# Supplementary material for: Venomics and Cellular Toxicity of Thai Pit Vipers (Trimeresurus macrops and T. hageni)
Source: Toxins (Basel). 2020 Jan 16;12(1):54. doi: 10.3390/toxins12010054 (PMC7020458; doi:10.3390/toxins12010054)
Supplement: Supplementary file 1 [file toxins-12-00054-s001.xlsx]

## Sheet: macrop
T. macrops venom proteins identified by proteomics
prot_hit_num	prot_acc	prot_desc	prot_score	prot_mass	prot_matches	prot_matches_sig	prot_sequences	prot_sequences_sig	prot_cover	prot_pi	pep_query	pep_rank	pep_isbold	pep_isunique	pep_exp_mz	pep_exp_mr	pep_exp_z	pep_calc_mr	pep_delta	pep_miss	pep_score	pep_expect	pep_res_before	pep_seq	pep_res_after	pep_var_mod	pep_var_mod_pos	pep_scan_title
1	gi|697351484	Chain A, Crystal Structure Of A Acidic Pla2 From Trimeresurus Stejnegeri Venom	443	13710	26	14	4	2	36.4	4.81	1734	1	1	0	404.712	807.409	2	807.406	0.0032	0	50.09	0.17	K	AAAICFR	D	Carbamidomethyl (C)	0.0000100.0	Cmpd 207, AutoMSn(404.7119), 15.7 min
1	gi|697351484	Chain A, Crystal Structure Of A Acidic Pla2 From Trimeresurus Stejnegeri Venom	443	13710	26	14	4	2	36.4	4.81	1735	1	1	0	404.712	807.41	2	807.406	0.0043	0	54.57	0.06	K	AAAICFR	D	Carbamidomethyl (C)	0.0000100.0	Cmpd 211, AutoMSn(404.7125), 15.8 min
1	gi|697351484	Chain A, Crystal Structure Of A Acidic Pla2 From Trimeresurus Stejnegeri Venom	443	13710	26	14	4	2	36.4	4.81	1736	1	1	0	404.714	807.413	2	807.406	0.0069	0	35.14	5.3	K	AAAICFR	D	Carbamidomethyl (C)	0.0000100.0	Cmpd 208, AutoMSn(404.7138), 15.7 min
1	gi|697351484	Chain A, Crystal Structure Of A Acidic Pla2 From Trimeresurus Stejnegeri Venom	443	13710	26	14	4	2	36.4	4.81	5055	1	1	0	871.891	1741.77	2	1741.76	0.0091	1	31.28	10	K	EICECDKAAAICFR	D	3 Carbamidomethyl (C)	0.00101000000100.0	Cmpd 272, AutoMSn(871.8911), 17.2 min
1	gi|697351484	Chain A, Crystal Structure Of A Acidic Pla2 From Trimeresurus Stejnegeri Venom	443	13710	26	14	4	2	36.4	4.81	5056	1	1	0	871.894	1741.77	2	1741.76	0.0138	1	66.9	0.0028	K	EICECDKAAAICFR	D	3 Carbamidomethyl (C)	0.00101000000100.0	Cmpd 269, AutoMSn(871.8935), 17.1 min
1	gi|697351484	Chain A, Crystal Structure Of A Acidic Pla2 From Trimeresurus Stejnegeri Venom	443	13710	26	14	4	2	36.4	4.81	5057	1	1	0	581.6	1741.78	3	1741.76	0.0186	1	68.34	0.002	K	EICECDKAAAICFR	D	3 Carbamidomethyl (C)	0.00101000000100.0	Cmpd 268, AutoMSn(581.5997), 17.1 min
1	gi|697351484	Chain A, Crystal Structure Of A Acidic Pla2 From Trimeresurus Stejnegeri Venom	443	13710	26	14	4	2	36.4	4.81	5058	1	1	0	581.6	1741.78	3	1741.76	0.0194	1	55.53	0.038	K	EICECDKAAAICFR	D	3 Carbamidomethyl (C)	0.00101000000100.0	Cmpd 271, AutoMSn(581.6000), 17.1 min
1	gi|697351484	Chain A, Crystal Structure Of A Acidic Pla2 From Trimeresurus Stejnegeri Venom	443	13710	26	14	4	2	36.4	4.81	5059	1	1	0	581.6	1741.78	3	1741.76	0.0207	1	61.07	0.011	K	EICECDKAAAICFR	D	3 Carbamidomethyl (C)	0.00101000000100.0	Cmpd 276, AutoMSn(581.6004), 17.2 min
1	gi|697351484	Chain A, Crystal Structure Of A Acidic Pla2 From Trimeresurus Stejnegeri Venom	443	13710	26	14	4	2	36.4	4.81	5276	1	1	0	899.885	1797.76	2	1797.75	0.006	0	35.61	4	R	SGIVWYSDYGCFCGK	G	2 Carbamidomethyl (C)	0.000000000010100.0	Cmpd 554, AutoMSn(899.8848), 22.6 min
1	gi|697351484	Chain A, Crystal Structure Of A Acidic Pla2 From Trimeresurus Stejnegeri Venom	443	13710	26	14	4	2	36.4	4.81	5277	1	1	0	899.885	1797.76	2	1797.75	0.0071	0	35.91	3.7	R	SGIVWYSDYGCFCGK	G	2 Carbamidomethyl (C)	0.000000000010100.0	Cmpd 384, AutoMSn(899.8854), 22.4 min
1	gi|697351484	Chain A, Crystal Structure Of A Acidic Pla2 From Trimeresurus Stejnegeri Venom	443	13710	26	14	4	2	36.4	4.81	5278	1	1	0	899.885	1797.76	2	1797.75	0.0073	0	67.67	0.0025	R	SGIVWYSDYGCFCGK	G	2 Carbamidomethyl (C)	0.000000000010100.0	Cmpd 501, AutoMSn(899.8855), 22.4 min
1	gi|697351484	Chain A, Crystal Structure Of A Acidic Pla2 From Trimeresurus Stejnegeri Venom	443	13710	26	14	4	2	36.4	4.81	5279	1	1	0	899.887	1797.76	2	1797.75	0.0096	0	36.45	3.3	R	SGIVWYSDYGCFCGK	G	2 Carbamidomethyl (C)	0.000000000010100.0	Cmpd 551, AutoMSn(899.8866), 22.5 min
1	gi|697351484	Chain A, Crystal Structure Of A Acidic Pla2 From Trimeresurus Stejnegeri Venom	443	13710	26	14	4	2	36.4	4.81	5280	1	1	0	899.887	1797.76	2	1797.75	0.0097	0	79.25	0.00017	R	SGIVWYSDYGCFCGK	G	2 Carbamidomethyl (C)	0.000000000010100.0	Cmpd 514, AutoMSn(899.8867), 22.7 min
1	gi|697351484	Chain A, Crystal Structure Of A Acidic Pla2 From Trimeresurus Stejnegeri Venom	443	13710	26	14	4	2	36.4	4.81	5281	1	1	0	899.887	1797.76	2	1797.75	0.01	0	18.36	210	R	SGIVWYSDYGCFCGK	G	2 Carbamidomethyl (C)	0.000000000010100.0	Cmpd 477, AutoMSn(899.8868), 22.4 min
1	gi|697351484	Chain A, Crystal Structure Of A Acidic Pla2 From Trimeresurus Stejnegeri Venom	443	13710	26	14	4	2	36.4	4.81	5282	1	1	0	899.887	1797.76	2	1797.75	0.0101	0	58.28	0.022	R	SGIVWYSDYGCFCGK	G	2 Carbamidomethyl (C)	0.000000000010100.0	Cmpd 547, AutoMSn(899.8869), 22.5 min
1	gi|697351484	Chain A, Crystal Structure Of A Acidic Pla2 From Trimeresurus Stejnegeri Venom	443	13710	26	14	4	2	36.4	4.81	5283	1	1	0	899.889	1797.76	2	1797.75	0.0135	0	50.95	0.12	R	SGIVWYSDYGCFCGK	G	2 Carbamidomethyl (C)	0.000000000010100.0	Cmpd 480, AutoMSn(899.8886), 22.5 min
1	gi|697351484	Chain A, Crystal Structure Of A Acidic Pla2 From Trimeresurus Stejnegeri Venom	443	13710	26	14	4	2	36.4	4.81	5285	3	1	0	899.889	1797.76	2	1797.75	0.0145	0	15.13	440	R	SGIVWYSDYGCFCGK	G	2 Carbamidomethyl (C)	0.000000000010100.0	Cmpd 552, AutoMSn(899.8891), 22.6 min
1	gi|697351484	Chain A, Crystal Structure Of A Acidic Pla2 From Trimeresurus Stejnegeri Venom	443	13710	26	14	4	2	36.4	4.81	5286	1	1	0	899.889	1797.76	2	1797.75	0.0152	0	54.99	0.045	R	SGIVWYSDYGCFCGK	G	2 Carbamidomethyl (C)	0.000000000010100.0	Cmpd 549, AutoMSn(899.8894), 22.5 min
1	gi|697351484	Chain A, Crystal Structure Of A Acidic Pla2 From Trimeresurus Stejnegeri Venom	443	13710	26	14	4	2	36.4	4.81	5287	1	1	0	600.263	1797.77	3	1797.75	0.0189	0	73.29	0.00066	R	SGIVWYSDYGCFCGK	G	2 Carbamidomethyl (C)	0.000000000010100.0	Cmpd 505, AutoMSn(600.2633), 22.5 min
1	gi|697351484	Chain A, Crystal Structure Of A Acidic Pla2 From Trimeresurus Stejnegeri Venom	443	13710	26	14	4	2	36.4	4.81	5288	1	1	0	600.264	1797.77	3	1797.75	0.02	0	60.74	0.012	R	SGIVWYSDYGCFCGK	G	2 Carbamidomethyl (C)	0.000000000010100.0	Cmpd 502, AutoMSn(600.2636), 22.4 min
1	gi|697351484	Chain A, Crystal Structure Of A Acidic Pla2 From Trimeresurus Stejnegeri Venom	443	13710	26	14	4	2	36.4	4.81	5289	1	1	0	600.264	1797.77	3	1797.75	0.0208	0	68.22	0.0021	R	SGIVWYSDYGCFCGK	G	2 Carbamidomethyl (C)	0.000000000010100.0	Cmpd 509, AutoMSn(600.2639), 22.6 min
1	gi|697351484	Chain A, Crystal Structure Of A Acidic Pla2 From Trimeresurus Stejnegeri Venom	443	13710	26	14	4	2	36.4	4.81	5290	1	1	0	900.096	1798.18	2	1797.75	0.4273	0	78.02	0.00038	R	SGIVWYSDYGCFCGK	G	2 Carbamidomethyl (C)	0.000000000010100.0	Cmpd 512, AutoMSn(900.0955), 22.6 min
1	gi|697351484	Chain A, Crystal Structure Of A Acidic Pla2 From Trimeresurus Stejnegeri Venom	443	13710	26	14	4	2	36.4	4.81	5291	1	1	0	900.098	1798.18	2	1797.75	0.4327	0	86.14	5.9e-05	R	SGIVWYSDYGCFCGK	G	2 Carbamidomethyl (C)	0.000000000010100.0	Cmpd 504, AutoMSn(900.0982), 22.5 min
1	gi|697351484	Chain A, Crystal Structure Of A Acidic Pla2 From Trimeresurus Stejnegeri Venom	443	13710	26	14	4	2	36.4	4.81	5292	1	1	0	900.122	1798.23	2	1797.75	0.4797	0	85.89	6.5e-05	R	SGIVWYSDYGCFCGK	G	2 Carbamidomethyl (C)	0.000000000010100.0	Cmpd 507, AutoMSn(900.1217), 22.5 min
1	gi|697351484	Chain A, Crystal Structure Of A Acidic Pla2 From Trimeresurus Stejnegeri Venom	443	13710	26	14	4	2	36.4	4.81	5293	1	1	0	900.177	1798.34	2	1797.75	0.5896	0	37.39	4.7	R	SGIVWYSDYGCFCGK	G	2 Carbamidomethyl (C)	0.000000000010100.0	Cmpd 519, AutoMSn(900.1766), 22.5 min
1	gi|697351484	Chain A, Crystal Structure Of A Acidic Pla2 From Trimeresurus Stejnegeri Venom	443	13710	26	14	4	2	36.4	4.81	5567	5	1	1	649.262	1944.76	3	1944.73	0.031	0	14.93	560	K	YWNIPMESCQESEPC	-	2 Carbamidomethyl (C); Oxidation (M)	0.000002001000001.0	Cmpd 440, AutoMSn(649.2619), 20.9 min	emPAI	2.03
2	gi|13959432	RecName: Full=Acidic phospholipase A2 5; Short=svPLA2; AltName: Full=PLA2-V; AltName: Full=Phosphatidylcholine 2-acylhydrolase [Trimeresurus stejnegeri]	442	13870	33	14	4	2	27.9	4.72	1502	1	1	0	731.315	730.308	1	730.311	-0.0033	0	25.64	68	K	MDFYR	Y			Cmpd 224, AutoMSn(731.3149), 16.1 min
2	gi|13959432	RecName: Full=Acidic phospholipase A2 5; Short=svPLA2; AltName: Full=PLA2-V; AltName: Full=Phosphatidylcholine 2-acylhydrolase [Trimeresurus stejnegeri]	442	13870	33	14	4	2	27.9	4.72	1503	1	1	0	731.315	730.308	1	730.311	-0.0029	0	9.6	2700	K	MDFYR	Y			Cmpd 226, AutoMSn(731.3152), 16.1 min
2	gi|13959432	RecName: Full=Acidic phospholipase A2 5; Short=svPLA2; AltName: Full=PLA2-V; AltName: Full=Phosphatidylcholine 2-acylhydrolase [Trimeresurus stejnegeri]	442	13870	33	14	4	2	27.9	4.72	1504	1	1	0	366.163	730.312	2	730.311	0.0013	0	15.59	690	K	MDFYR	Y			Cmpd 227, AutoMSn(366.1633), 16.1 min
2	gi|13959432	RecName: Full=Acidic phospholipase A2 5; Short=svPLA2; AltName: Full=PLA2-V; AltName: Full=Phosphatidylcholine 2-acylhydrolase [Trimeresurus stejnegeri]	442	13870	33	14	4	2	27.9	4.72	1505	3	1	0	366.165	730.315	2	730.311	0.0042	0	15.46	710	K	MDFYR	Y			Cmpd 223, AutoMSn(366.1648), 16.1 min
2	gi|13959432	RecName: Full=Acidic phospholipase A2 5; Short=svPLA2; AltName: Full=PLA2-V; AltName: Full=Phosphatidylcholine 2-acylhydrolase [Trimeresurus stejnegeri]	442	13870	33	14	4	2	27.9	4.72	1506	1	1	0	366.165	730.316	2	730.311	0.005	0	25.41	72	K	MDFYR	Y			Cmpd 222, AutoMSn(366.1652), 16.0 min
2	gi|13959432	RecName: Full=Acidic phospholipase A2 5; Short=svPLA2; AltName: Full=PLA2-V; AltName: Full=Phosphatidylcholine 2-acylhydrolase [Trimeresurus stejnegeri]	442	13870	33	14	4	2	27.9	4.72	1529	1	1	0	747.31	746.303	1	746.306	-0.0026	0	12	1500	K	MDFYR	Y	Oxidation (M)	0.20000.0	Cmpd 122, AutoMSn(747.3104), 13.8 min
2	gi|13959432	RecName: Full=Acidic phospholipase A2 5; Short=svPLA2; AltName: Full=PLA2-V; AltName: Full=Phosphatidylcholine 2-acylhydrolase [Trimeresurus stejnegeri]	442	13870	33	14	4	2	27.9	4.72	1530	1	1	0	374.163	746.312	2	746.306	0.0065	0	14.89	790	K	MDFYR	Y	Oxidation (M)	0.20000.0	Cmpd 121, AutoMSn(374.1634), 13.8 min
2	gi|13959432	RecName: Full=Acidic phospholipase A2 5; Short=svPLA2; AltName: Full=PLA2-V; AltName: Full=Phosphatidylcholine 2-acylhydrolase [Trimeresurus stejnegeri]	442	13870	33	14	4	2	27.9	4.72	1531	1	1	0	374.164	746.313	2	746.306	0.007	0	15.08	750	K	MDFYR	Y	Oxidation (M)	0.20000.0	Cmpd 119, AutoMSn(374.1636), 13.7 min
2	gi|13959432	RecName: Full=Acidic phospholipase A2 5; Short=svPLA2; AltName: Full=PLA2-V; AltName: Full=Phosphatidylcholine 2-acylhydrolase [Trimeresurus stejnegeri]	442	13870	33	14	4	2	27.9	4.72	1734	1	0	0	404.712	807.409	2	807.406	0.0032	0	50.09	0.17	K	AAAICFR	D	Carbamidomethyl (C)	0.0000100.0	Cmpd 207, AutoMSn(404.7119), 15.7 min
2	gi|13959432	RecName: Full=Acidic phospholipase A2 5; Short=svPLA2; AltName: Full=PLA2-V; AltName: Full=Phosphatidylcholine 2-acylhydrolase [Trimeresurus stejnegeri]	442	13870	33	14	4	2	27.9	4.72	1735	1	0	0	404.712	807.41	2	807.406	0.0043	0	54.57	0.06	K	AAAICFR	D	Carbamidomethyl (C)	0.0000100.0	Cmpd 211, AutoMSn(404.7125), 15.8 min
2	gi|13959432	RecName: Full=Acidic phospholipase A2 5; Short=svPLA2; AltName: Full=PLA2-V; AltName: Full=Phosphatidylcholine 2-acylhydrolase [Trimeresurus stejnegeri]	442	13870	33	14	4	2	27.9	4.72	1736	1	0	0	404.714	807.413	2	807.406	0.0069	0	35.14	5.3	K	AAAICFR	D	Carbamidomethyl (C)	0.0000100.0	Cmpd 208, AutoMSn(404.7138), 15.7 min
2	gi|13959432	RecName: Full=Acidic phospholipase A2 5; Short=svPLA2; AltName: Full=PLA2-V; AltName: Full=Phosphatidylcholine 2-acylhydrolase [Trimeresurus stejnegeri]	442	13870	33	14	4	2	27.9	4.72	5055	1	0	0	871.891	1741.77	2	1741.76	0.0091	1	31.28	10	K	EICECDKAAAICFR	D	3 Carbamidomethyl (C)	0.00101000000100.0	Cmpd 272, AutoMSn(871.8911), 17.2 min
2	gi|13959432	RecName: Full=Acidic phospholipase A2 5; Short=svPLA2; AltName: Full=PLA2-V; AltName: Full=Phosphatidylcholine 2-acylhydrolase [Trimeresurus stejnegeri]	442	13870	33	14	4	2	27.9	4.72	5056	1	0	0	871.894	1741.77	2	1741.76	0.0138	1	66.9	0.0028	K	EICECDKAAAICFR	D	3 Carbamidomethyl (C)	0.00101000000100.0	Cmpd 269, AutoMSn(871.8935), 17.1 min
2	gi|13959432	RecName: Full=Acidic phospholipase A2 5; Short=svPLA2; AltName: Full=PLA2-V; AltName: Full=Phosphatidylcholine 2-acylhydrolase [Trimeresurus stejnegeri]	442	13870	33	14	4	2	27.9	4.72	5057	1	0	0	581.6	1741.78	3	1741.76	0.0186	1	68.34	0.002	K	EICECDKAAAICFR	D	3 Carbamidomethyl (C)	0.00101000000100.0	Cmpd 268, AutoMSn(581.5997), 17.1 min
2	gi|13959432	RecName: Full=Acidic phospholipase A2 5; Short=svPLA2; AltName: Full=PLA2-V; AltName: Full=Phosphatidylcholine 2-acylhydrolase [Trimeresurus stejnegeri]	442	13870	33	14	4	2	27.9	4.72	5058	1	0	0	581.6	1741.78	3	1741.76	0.0194	1	55.53	0.038	K	EICECDKAAAICFR	D	3 Carbamidomethyl (C)	0.00101000000100.0	Cmpd 271, AutoMSn(581.6000), 17.1 min
2	gi|13959432	RecName: Full=Acidic phospholipase A2 5; Short=svPLA2; AltName: Full=PLA2-V; AltName: Full=Phosphatidylcholine 2-acylhydrolase [Trimeresurus stejnegeri]	442	13870	33	14	4	2	27.9	4.72	5059	1	0	0	581.6	1741.78	3	1741.76	0.0207	1	61.07	0.011	K	EICECDKAAAICFR	D	3 Carbamidomethyl (C)	0.00101000000100.0	Cmpd 276, AutoMSn(581.6004), 17.2 min
2	gi|13959432	RecName: Full=Acidic phospholipase A2 5; Short=svPLA2; AltName: Full=PLA2-V; AltName: Full=Phosphatidylcholine 2-acylhydrolase [Trimeresurus stejnegeri]	442	13870	33	14	4	2	27.9	4.72	5276	1	0	0	899.885	1797.76	2	1797.75	0.006	0	35.61	4	R	SGIVWYSDYGCFCGK	G	2 Carbamidomethyl (C)	0.000000000010100.0	Cmpd 554, AutoMSn(899.8848), 22.6 min
2	gi|13959432	RecName: Full=Acidic phospholipase A2 5; Short=svPLA2; AltName: Full=PLA2-V; AltName: Full=Phosphatidylcholine 2-acylhydrolase [Trimeresurus stejnegeri]	442	13870	33	14	4	2	27.9	4.72	5277	1	0	0	899.885	1797.76	2	1797.75	0.0071	0	35.91	3.7	R	SGIVWYSDYGCFCGK	G	2 Carbamidomethyl (C)	0.000000000010100.0	Cmpd 384, AutoMSn(899.8854), 22.4 min
2	gi|13959432	RecName: Full=Acidic phospholipase A2 5; Short=svPLA2; AltName: Full=PLA2-V; AltName: Full=Phosphatidylcholine 2-acylhydrolase [Trimeresurus stejnegeri]	442	13870	33	14	4	2	27.9	4.72	5278	1	0	0	899.885	1797.76	2	1797.75	0.0073	0	67.67	0.0025	R	SGIVWYSDYGCFCGK	G	2 Carbamidomethyl (C)	0.000000000010100.0	Cmpd 501, AutoMSn(899.8855), 22.4 min
2	gi|13959432	RecName: Full=Acidic phospholipase A2 5; Short=svPLA2; AltName: Full=PLA2-V; AltName: Full=Phosphatidylcholine 2-acylhydrolase [Trimeresurus stejnegeri]	442	13870	33	14	4	2	27.9	4.72	5279	1	0	0	899.887	1797.76	2	1797.75	0.0096	0	36.45	3.3	R	SGIVWYSDYGCFCGK	G	2 Carbamidomethyl (C)	0.000000000010100.0	Cmpd 551, AutoMSn(899.8866), 22.5 min
2	gi|13959432	RecName: Full=Acidic phospholipase A2 5; Short=svPLA2; AltName: Full=PLA2-V; AltName: Full=Phosphatidylcholine 2-acylhydrolase [Trimeresurus stejnegeri]	442	13870	33	14	4	2	27.9	4.72	5280	1	0	0	899.887	1797.76	2	1797.75	0.0097	0	79.25	0.00017	R	SGIVWYSDYGCFCGK	G	2 Carbamidomethyl (C)	0.000000000010100.0	Cmpd 514, AutoMSn(899.8867), 22.7 min
2	gi|13959432	RecName: Full=Acidic phospholipase A2 5; Short=svPLA2; AltName: Full=PLA2-V; AltName: Full=Phosphatidylcholine 2-acylhydrolase [Trimeresurus stejnegeri]	442	13870	33	14	4	2	27.9	4.72	5281	1	0	0	899.887	1797.76	2	1797.75	0.01	0	18.36	210	R	SGIVWYSDYGCFCGK	G	2 Carbamidomethyl (C)	0.000000000010100.0	Cmpd 477, AutoMSn(899.8868), 22.4 min
2	gi|13959432	RecName: Full=Acidic phospholipase A2 5; Short=svPLA2; AltName: Full=PLA2-V; AltName: Full=Phosphatidylcholine 2-acylhydrolase [Trimeresurus stejnegeri]	442	13870	33	14	4	2	27.9	4.72	5282	1	0	0	899.887	1797.76	2	1797.75	0.0101	0	58.28	0.022	R	SGIVWYSDYGCFCGK	G	2 Carbamidomethyl (C)	0.000000000010100.0	Cmpd 547, AutoMSn(899.8869), 22.5 min
2	gi|13959432	RecName: Full=Acidic phospholipase A2 5; Short=svPLA2; AltName: Full=PLA2-V; AltName: Full=Phosphatidylcholine 2-acylhydrolase [Trimeresurus stejnegeri]	442	13870	33	14	4	2	27.9	4.72	5283	1	0	0	899.889	1797.76	2	1797.75	0.0135	0	50.95	0.12	R	SGIVWYSDYGCFCGK	G	2 Carbamidomethyl (C)	0.000000000010100.0	Cmpd 480, AutoMSn(899.8886), 22.5 min
2	gi|13959432	RecName: Full=Acidic phospholipase A2 5; Short=svPLA2; AltName: Full=PLA2-V; AltName: Full=Phosphatidylcholine 2-acylhydrolase [Trimeresurus stejnegeri]	442	13870	33	14	4	2	27.9	4.72	5285	3	0	0	899.889	1797.76	2	1797.75	0.0145	0	15.13	440	R	SGIVWYSDYGCFCGK	G	2 Carbamidomethyl (C)	0.000000000010100.0	Cmpd 552, AutoMSn(899.8891), 22.6 min
2	gi|13959432	RecName: Full=Acidic phospholipase A2 5; Short=svPLA2; AltName: Full=PLA2-V; AltName: Full=Phosphatidylcholine 2-acylhydrolase [Trimeresurus stejnegeri]	442	13870	33	14	4	2	27.9	4.72	5286	1	0	0	899.889	1797.76	2	1797.75	0.0152	0	54.99	0.045	R	SGIVWYSDYGCFCGK	G	2 Carbamidomethyl (C)	0.000000000010100.0	Cmpd 549, AutoMSn(899.8894), 22.5 min
2	gi|13959432	RecName: Full=Acidic phospholipase A2 5; Short=svPLA2; AltName: Full=PLA2-V; AltName: Full=Phosphatidylcholine 2-acylhydrolase [Trimeresurus stejnegeri]	442	13870	33	14	4	2	27.9	4.72	5287	1	0	0	600.263	1797.77	3	1797.75	0.0189	0	73.29	0.00066	R	SGIVWYSDYGCFCGK	G	2 Carbamidomethyl (C)	0.000000000010100.0	Cmpd 505, AutoMSn(600.2633), 22.5 min
2	gi|13959432	RecName: Full=Acidic phospholipase A2 5; Short=svPLA2; AltName: Full=PLA2-V; AltName: Full=Phosphatidylcholine 2-acylhydrolase [Trimeresurus stejnegeri]	442	13870	33	14	4	2	27.9	4.72	5288	1	0	0	600.264	1797.77	3	1797.75	0.02	0	60.74	0.012	R	SGIVWYSDYGCFCGK	G	2 Carbamidomethyl (C)	0.000000000010100.0	Cmpd 502, AutoMSn(600.2636), 22.4 min
2	gi|13959432	RecName: Full=Acidic phospholipase A2 5; Short=svPLA2; AltName: Full=PLA2-V; AltName: Full=Phosphatidylcholine 2-acylhydrolase [Trimeresurus stejnegeri]	442	13870	33	14	4	2	27.9	4.72	5289	1	0	0	600.264	1797.77	3	1797.75	0.0208	0	68.22	0.0021	R	SGIVWYSDYGCFCGK	G	2 Carbamidomethyl (C)	0.000000000010100.0	Cmpd 509, AutoMSn(600.2639), 22.6 min
2	gi|13959432	RecName: Full=Acidic phospholipase A2 5; Short=svPLA2; AltName: Full=PLA2-V; AltName: Full=Phosphatidylcholine 2-acylhydrolase [Trimeresurus stejnegeri]	442	13870	33	14	4	2	27.9	4.72	5290	1	0	0	900.096	1798.18	2	1797.75	0.4273	0	78.02	0.00038	R	SGIVWYSDYGCFCGK	G	2 Carbamidomethyl (C)	0.000000000010100.0	Cmpd 512, AutoMSn(900.0955), 22.6 min
2	gi|13959432	RecName: Full=Acidic phospholipase A2 5; Short=svPLA2; AltName: Full=PLA2-V; AltName: Full=Phosphatidylcholine 2-acylhydrolase [Trimeresurus stejnegeri]	442	13870	33	14	4	2	27.9	4.72	5291	1	0	0	900.098	1798.18	2	1797.75	0.4327	0	86.14	5.9e-05	R	SGIVWYSDYGCFCGK	G	2 Carbamidomethyl (C)	0.000000000010100.0	Cmpd 504, AutoMSn(900.0982), 22.5 min
2	gi|13959432	RecName: Full=Acidic phospholipase A2 5; Short=svPLA2; AltName: Full=PLA2-V; AltName: Full=Phosphatidylcholine 2-acylhydrolase [Trimeresurus stejnegeri]	442	13870	33	14	4	2	27.9	4.72	5292	1	0	0	900.122	1798.23	2	1797.75	0.4797	0	85.89	6.5e-05	R	SGIVWYSDYGCFCGK	G	2 Carbamidomethyl (C)	0.000000000010100.0	Cmpd 507, AutoMSn(900.1217), 22.5 min
2	gi|13959432	RecName: Full=Acidic phospholipase A2 5; Short=svPLA2; AltName: Full=PLA2-V; AltName: Full=Phosphatidylcholine 2-acylhydrolase [Trimeresurus stejnegeri]	442	13870	33	14	4	2	27.9	4.72	5293	1	0	0	900.177	1798.34	2	1797.75	0.5896	0	37.39	4.7	R	SGIVWYSDYGCFCGK	G	2 Carbamidomethyl (C)	0.000000000010100.0	Cmpd 519, AutoMSn(900.1766), 22.5 min	emPAI	2.74
3	gi|123894851	RecName: Full=Zinc metalloproteinase-disintegrin-like TSV-DM; AltName: Full=Snake venom metalloproteinase; Short=SVMP; Flags: Precursor [Trimeresurus stejnegeri]	364	68673	25	7	7	4	12.2	6.4	1096	1	1	0	649.386	648.379	1	648.385	-0.0057	0	9.5	2200	R	EFLIK	N			Cmpd 298, AutoMSn(649.3862), 17.5 min
3	gi|123894851	RecName: Full=Zinc metalloproteinase-disintegrin-like TSV-DM; AltName: Full=Snake venom metalloproteinase; Short=SVMP; Flags: Precursor [Trimeresurus stejnegeri]	364	68673	25	7	7	4	12.2	6.4	1097	1	1	0	649.389	648.381	1	648.385	-0.0034	0	9.4	2300	R	EFLIK	N			Cmpd 295, AutoMSn(649.3885), 17.4 min
3	gi|123894851	RecName: Full=Zinc metalloproteinase-disintegrin-like TSV-DM; AltName: Full=Snake venom metalloproteinase; Short=SVMP; Flags: Precursor [Trimeresurus stejnegeri]	364	68673	25	7	7	4	12.2	6.4	3421	1	1	0	634.305	1266.6	2	1266.59	0.0046	0	31.51	11	R	LYCIDSSPANK	N	Carbamidomethyl (C)	0.00100000000.0	Cmpd 238, AutoMSn(634.3053), 16.2 min
3	gi|123894851	RecName: Full=Zinc metalloproteinase-disintegrin-like TSV-DM; AltName: Full=Snake venom metalloproteinase; Short=SVMP; Flags: Precursor [Trimeresurus stejnegeri]	364	68673	25	7	7	4	12.2	6.4	3424	1	1	1	634.405	1266.8	2	1266.79	0.0054	0	31.29	14	K	IIVQSVPAVTLK	L			Cmpd 439, AutoMSn(634.4055), 20.7 min
3	gi|123894851	RecName: Full=Zinc metalloproteinase-disintegrin-like TSV-DM; AltName: Full=Snake venom metalloproteinase; Short=SVMP; Flags: Precursor [Trimeresurus stejnegeri]	364	68673	25	7	7	4	12.2	6.4	3425	1	1	1	634.406	1266.8	2	1266.79	0.0072	0	28.11	30	K	IIVQSVPAVTLK	L			Cmpd 439, AutoMSn(634.4064), 20.7 min
3	gi|123894851	RecName: Full=Zinc metalloproteinase-disintegrin-like TSV-DM; AltName: Full=Snake venom metalloproteinase; Short=SVMP; Flags: Precursor [Trimeresurus stejnegeri]	364	68673	25	7	7	4	12.2	6.4	3436	8	1	0	635.289	1268.56	2	1268.56	0.0065	1	16.71	330	R	SAECTDRFQR	N	Carbamidomethyl (C)	0.0001000000.0	Cmpd 42, AutoMSn(635.2889), 11.9 min
3	gi|123894851	RecName: Full=Zinc metalloproteinase-disintegrin-like TSV-DM; AltName: Full=Snake venom metalloproteinase; Short=SVMP; Flags: Precursor [Trimeresurus stejnegeri]	364	68673	25	7	7	4	12.2	6.4	3441	1	1	0	423.863	1268.57	3	1268.56	0.0118	1	35.52	4.3	R	SAECTDRFQR	N	Carbamidomethyl (C)	0.0001000000.0	Cmpd 20, AutoMSn(423.8635), 11.8 min
3	gi|123894851	RecName: Full=Zinc metalloproteinase-disintegrin-like TSV-DM; AltName: Full=Snake venom metalloproteinase; Short=SVMP; Flags: Precursor [Trimeresurus stejnegeri]	364	68673	25	7	7	4	12.2	6.4	3442	1	1	0	423.864	1268.57	3	1268.56	0.0125	1	55.21	0.046	R	SAECTDRFQR	N	Carbamidomethyl (C)	0.0001000000.0	Cmpd 56, AutoMSn(423.8637), 12.1 min
3	gi|123894851	RecName: Full=Zinc metalloproteinase-disintegrin-like TSV-DM; AltName: Full=Snake venom metalloproteinase; Short=SVMP; Flags: Precursor [Trimeresurus stejnegeri]	364	68673	25	7	7	4	12.2	6.4	3444	1	1	0	423.864	1268.57	3	1268.56	0.014	1	51.94	0.098	R	SAECTDRFQR	N	Carbamidomethyl (C)	0.0001000000.0	Cmpd 48, AutoMSn(423.8642), 11.9 min
3	gi|123894851	RecName: Full=Zinc metalloproteinase-disintegrin-like TSV-DM; AltName: Full=Snake venom metalloproteinase; Short=SVMP; Flags: Precursor [Trimeresurus stejnegeri]	364	68673	25	7	7	4	12.2	6.4	3445	1	1	0	423.864	1268.57	3	1268.56	0.0144	1	27.59	27	R	SAECTDRFQR	N	Carbamidomethyl (C)	0.0001000000.0	Cmpd 41, AutoMSn(423.8643), 11.9 min
3	gi|123894851	RecName: Full=Zinc metalloproteinase-disintegrin-like TSV-DM; AltName: Full=Snake venom metalloproteinase; Short=SVMP; Flags: Precursor [Trimeresurus stejnegeri]	364	68673	25	7	7	4	12.2	6.4	3447	1	1	0	423.865	1268.57	3	1268.56	0.0156	1	38.25	2.3	R	SAECTDRFQR	N	Carbamidomethyl (C)	0.0001000000.0	Cmpd 17, AutoMSn(423.8647), 11.8 min
3	gi|123894851	RecName: Full=Zinc metalloproteinase-disintegrin-like TSV-DM; AltName: Full=Snake venom metalloproteinase; Short=SVMP; Flags: Precursor [Trimeresurus stejnegeri]	364	68673	25	7	7	4	12.2	6.4	3448	1	1	0	423.865	1268.57	3	1268.56	0.0159	1	29.21	18	R	SAECTDRFQR	N	Carbamidomethyl (C)	0.0001000000.0	Cmpd 94, AutoMSn(423.8648), 11.9 min
3	gi|123894851	RecName: Full=Zinc metalloproteinase-disintegrin-like TSV-DM; AltName: Full=Snake venom metalloproteinase; Short=SVMP; Flags: Precursor [Trimeresurus stejnegeri]	364	68673	25	7	7	4	12.2	6.4	3449	1	1	0	423.865	1268.57	3	1268.56	0.016	1	56.5	0.034	R	SAECTDRFQR	N	Carbamidomethyl (C)	0.0001000000.0	Cmpd 51, AutoMSn(423.8649), 12.0 min
3	gi|123894851	RecName: Full=Zinc metalloproteinase-disintegrin-like TSV-DM; AltName: Full=Snake venom metalloproteinase; Short=SVMP; Flags: Precursor [Trimeresurus stejnegeri]	364	68673	25	7	7	4	12.2	6.4	3450	1	1	0	423.868	1268.58	3	1268.56	0.0264	1	52	0.095	R	SAECTDRFQR	N	Carbamidomethyl (C)	0.0001000000.0	Cmpd 39, AutoMSn(423.8683), 11.9 min
3	gi|123894851	RecName: Full=Zinc metalloproteinase-disintegrin-like TSV-DM; AltName: Full=Snake venom metalloproteinase; Short=SVMP; Flags: Precursor [Trimeresurus stejnegeri]	364	68673	25	7	7	4	12.2	6.4	5321	1	1	0	906.852	1811.69	2	1811.68	0.0093	0	74.47	0.00067	R	QGAQCAEGLCCDQCR	F	4 Carbamidomethyl (C)	0.000010000110010.0	Cmpd 144, AutoMSn(906.8523), 14.1 min
3	gi|123894851	RecName: Full=Zinc metalloproteinase-disintegrin-like TSV-DM; AltName: Full=Snake venom metalloproteinase; Short=SVMP; Flags: Precursor [Trimeresurus stejnegeri]	364	68673	25	7	7	4	12.2	6.4	5322	1	1	0	906.854	1811.69	2	1811.68	0.012	0	42.49	1	R	QGAQCAEGLCCDQCR	F	4 Carbamidomethyl (C)	0.000010000110010.0	Cmpd 148, AutoMSn(906.8536), 14.1 min
3	gi|123894851	RecName: Full=Zinc metalloproteinase-disintegrin-like TSV-DM; AltName: Full=Snake venom metalloproteinase; Short=SVMP; Flags: Precursor [Trimeresurus stejnegeri]	364	68673	25	7	7	4	12.2	6.4	5325	1	1	0	604.908	1811.7	3	1811.68	0.0221	0	45.49	0.51	R	QGAQCAEGLCCDQCR	F	4 Carbamidomethyl (C)	0.000010000110010.0	Cmpd 149, AutoMSn(604.9082), 14.1 min
3	gi|123894851	RecName: Full=Zinc metalloproteinase-disintegrin-like TSV-DM; AltName: Full=Snake venom metalloproteinase; Short=SVMP; Flags: Precursor [Trimeresurus stejnegeri]	364	68673	25	7	7	4	12.2	6.4	5815	1	1	0	694.635	2080.88	3	2080.87	0.0186	1	85.74	3.6e-05	K	LRQGAQCAEGLCCDQCR	F	4 Carbamidomethyl (C)	0.00000010000110010.0	Cmpd 125, AutoMSn(694.6355), 13.6 min
3	gi|123894851	RecName: Full=Zinc metalloproteinase-disintegrin-like TSV-DM; AltName: Full=Snake venom metalloproteinase; Short=SVMP; Flags: Precursor [Trimeresurus stejnegeri]	364	68673	25	7	7	4	12.2	6.4	5816	1	1	0	694.637	2080.89	3	2080.87	0.0236	1	50.36	0.12	K	LRQGAQCAEGLCCDQCR	F	4 Carbamidomethyl (C)	0.00000010000110010.0	Cmpd 127, AutoMSn(694.6371), 13.7 min
3	gi|123894851	RecName: Full=Zinc metalloproteinase-disintegrin-like TSV-DM; AltName: Full=Snake venom metalloproteinase; Short=SVMP; Flags: Precursor [Trimeresurus stejnegeri]	364	68673	25	7	7	4	12.2	6.4	6224	1	1	1	1185.99	2369.97	2	2369.97	-0.0033	0	21.35	110	K	ACVMAGTISCDASYLFSDCSR	Q	3 Carbamidomethyl (C)	0.010000000100000000100.0	Cmpd 584, AutoMSn(1185.9931), 24.0 min
3	gi|123894851	RecName: Full=Zinc metalloproteinase-disintegrin-like TSV-DM; AltName: Full=Snake venom metalloproteinase; Short=SVMP; Flags: Precursor [Trimeresurus stejnegeri]	364	68673	25	7	7	4	12.2	6.4	6226	1	1	1	791.006	2370	3	2369.97	0.0216	0	66.47	0.0031	K	ACVMAGTISCDASYLFSDCSR	Q	3 Carbamidomethyl (C)	0.010000000100000000100.0	Cmpd 585, AutoMSn(791.0061), 24.1 min
3	gi|123894851	RecName: Full=Zinc metalloproteinase-disintegrin-like TSV-DM; AltName: Full=Snake venom metalloproteinase; Short=SVMP; Flags: Precursor [Trimeresurus stejnegeri]	364	68673	25	7	7	4	12.2	6.4	6227	1	1	1	791.008	2370	3	2369.97	0.0264	0	73.83	0.00057	K	ACVMAGTISCDASYLFSDCSR	Q	3 Carbamidomethyl (C)	0.010000000100000000100.0	Cmpd 582, AutoMSn(791.0077), 24.0 min
3	gi|123894851	RecName: Full=Zinc metalloproteinase-disintegrin-like TSV-DM; AltName: Full=Snake venom metalloproteinase; Short=SVMP; Flags: Precursor [Trimeresurus stejnegeri]	364	68673	25	7	7	4	12.2	6.4	6228	1	1	1	791.015	2370.02	3	2369.97	0.0479	0	71.03	0.001	K	ACVMAGTISCDASYLFSDCSR	Q	3 Carbamidomethyl (C)	0.010000000100000000100.0	Cmpd 580, AutoMSn(791.0149), 23.9 min
3	gi|123894851	RecName: Full=Zinc metalloproteinase-disintegrin-like TSV-DM; AltName: Full=Snake venom metalloproteinase; Short=SVMP; Flags: Precursor [Trimeresurus stejnegeri]	364	68673	25	7	7	4	12.2	6.4	6251	1	1	1	796.338	2385.99	3	2385.97	0.0222	0	52.81	0.074	K	ACVMAGTISCDASYLFSDCSR	Q	3 Carbamidomethyl (C); Oxidation (M)	0.010200000100000000100.0	Cmpd 524, AutoMSn(796.3379), 22.6 min
3	gi|123894851	RecName: Full=Zinc metalloproteinase-disintegrin-like TSV-DM; AltName: Full=Snake venom metalloproteinase; Short=SVMP; Flags: Precursor [Trimeresurus stejnegeri]	364	68673	25	7	7	4	12.2	6.4	6252	1	1	1	796.34	2386	3	2385.97	0.0289	0	51.37	0.1	K	ACVMAGTISCDASYLFSDCSR	Q	3 Carbamidomethyl (C); Oxidation (M)	0.010200000100000000100.0	Cmpd 523, AutoMSn(796.3402), 22.5 min	emPAI	0.39
4	gi|82217336	RecName: Full=Zinc metalloproteinase-disintegrin-like HV1; AltName: Full=Snake venom metalloproteinase; Short=SVMP; AltName: Full=Vascular apoptosis-inducing protein; Short=VAP; Flags: Precursor [Protobothrops flavoviridis]	360	68147	20	7	4	4	7.8	5.96	3436	8	0	0	635.289	1268.56	2	1268.56	0.0065	1	16.71	330	R	SAECTDRFQR	N	Carbamidomethyl (C)	0.0001000000.0	Cmpd 42, AutoMSn(635.2889), 11.9 min
4	gi|82217336	RecName: Full=Zinc metalloproteinase-disintegrin-like HV1; AltName: Full=Snake venom metalloproteinase; Short=SVMP; AltName: Full=Vascular apoptosis-inducing protein; Short=VAP; Flags: Precursor [Protobothrops flavoviridis]	360	68147	20	7	4	4	7.8	5.96	3441	1	0	0	423.863	1268.57	3	1268.56	0.0118	1	35.52	4.3	R	SAECTDRFQR	N	Carbamidomethyl (C)	0.0001000000.0	Cmpd 20, AutoMSn(423.8635), 11.8 min
4	gi|82217336	RecName: Full=Zinc metalloproteinase-disintegrin-like HV1; AltName: Full=Snake venom metalloproteinase; Short=SVMP; AltName: Full=Vascular apoptosis-inducing protein; Short=VAP; Flags: Precursor [Protobothrops flavoviridis]	360	68147	20	7	4	4	7.8	5.96	3442	1	0	0	423.864	1268.57	3	1268.56	0.0125	1	55.21	0.046	R	SAECTDRFQR	N	Carbamidomethyl (C)	0.0001000000.0	Cmpd 56, AutoMSn(423.8637), 12.1 min
4	gi|82217336	RecName: Full=Zinc metalloproteinase-disintegrin-like HV1; AltName: Full=Snake venom metalloproteinase; Short=SVMP; AltName: Full=Vascular apoptosis-inducing protein; Short=VAP; Flags: Precursor [Protobothrops flavoviridis]	360	68147	20	7	4	4	7.8	5.96	3444	1	0	0	423.864	1268.57	3	1268.56	0.014	1	51.94	0.098	R	SAECTDRFQR	N	Carbamidomethyl (C)	0.0001000000.0	Cmpd 48, AutoMSn(423.8642), 11.9 min
4	gi|82217336	RecName: Full=Zinc metalloproteinase-disintegrin-like HV1; AltName: Full=Snake venom metalloproteinase; Short=SVMP; AltName: Full=Vascular apoptosis-inducing protein; Short=VAP; Flags: Precursor [Protobothrops flavoviridis]	360	68147	20	7	4	4	7.8	5.96	3445	1	0	0	423.864	1268.57	3	1268.56	0.0144	1	27.59	27	R	SAECTDRFQR	N	Carbamidomethyl (C)	0.0001000000.0	Cmpd 41, AutoMSn(423.8643), 11.9 min
4	gi|82217336	RecName: Full=Zinc metalloproteinase-disintegrin-like HV1; AltName: Full=Snake venom metalloproteinase; Short=SVMP; AltName: Full=Vascular apoptosis-inducing protein; Short=VAP; Flags: Precursor [Protobothrops flavoviridis]	360	68147	20	7	4	4	7.8	5.96	3447	1	0	0	423.865	1268.57	3	1268.56	0.0156	1	38.25	2.3	R	SAECTDRFQR	N	Carbamidomethyl (C)	0.0001000000.0	Cmpd 17, AutoMSn(423.8647), 11.8 min
4	gi|82217336	RecName: Full=Zinc metalloproteinase-disintegrin-like HV1; AltName: Full=Snake venom metalloproteinase; Short=SVMP; AltName: Full=Vascular apoptosis-inducing protein; Short=VAP; Flags: Precursor [Protobothrops flavoviridis]	360	68147	20	7	4	4	7.8	5.96	3448	1	0	0	423.865	1268.57	3	1268.56	0.0159	1	29.21	18	R	SAECTDRFQR	N	Carbamidomethyl (C)	0.0001000000.0	Cmpd 94, AutoMSn(423.8648), 11.9 min
4	gi|82217336	RecName: Full=Zinc metalloproteinase-disintegrin-like HV1; AltName: Full=Snake venom metalloproteinase; Short=SVMP; AltName: Full=Vascular apoptosis-inducing protein; Short=VAP; Flags: Precursor [Protobothrops flavoviridis]	360	68147	20	7	4	4	7.8	5.96	3449	1	0	0	423.865	1268.57	3	1268.56	0.016	1	56.5	0.034	R	SAECTDRFQR	N	Carbamidomethyl (C)	0.0001000000.0	Cmpd 51, AutoMSn(423.8649), 12.0 min
4	gi|82217336	RecName: Full=Zinc metalloproteinase-disintegrin-like HV1; AltName: Full=Snake venom metalloproteinase; Short=SVMP; AltName: Full=Vascular apoptosis-inducing protein; Short=VAP; Flags: Precursor [Protobothrops flavoviridis]	360	68147	20	7	4	4	7.8	5.96	3450	1	0	0	423.868	1268.58	3	1268.56	0.0264	1	52	0.095	R	SAECTDRFQR	N	Carbamidomethyl (C)	0.0001000000.0	Cmpd 39, AutoMSn(423.8683), 11.9 min
4	gi|82217336	RecName: Full=Zinc metalloproteinase-disintegrin-like HV1; AltName: Full=Snake venom metalloproteinase; Short=SVMP; AltName: Full=Vascular apoptosis-inducing protein; Short=VAP; Flags: Precursor [Protobothrops flavoviridis]	360	68147	20	7	4	4	7.8	5.96	5321	1	0	0	906.852	1811.69	2	1811.68	0.0093	0	74.47	0.00067	R	QGAQCAEGLCCDQCR	F	4 Carbamidomethyl (C)	0.000010000110010.0	Cmpd 144, AutoMSn(906.8523), 14.1 min
4	gi|82217336	RecName: Full=Zinc metalloproteinase-disintegrin-like HV1; AltName: Full=Snake venom metalloproteinase; Short=SVMP; AltName: Full=Vascular apoptosis-inducing protein; Short=VAP; Flags: Precursor [Protobothrops flavoviridis]	360	68147	20	7	4	4	7.8	5.96	5322	1	0	0	906.854	1811.69	2	1811.68	0.012	0	42.49	1	R	QGAQCAEGLCCDQCR	F	4 Carbamidomethyl (C)	0.000010000110010.0	Cmpd 148, AutoMSn(906.8536), 14.1 min
4	gi|82217336	RecName: Full=Zinc metalloproteinase-disintegrin-like HV1; AltName: Full=Snake venom metalloproteinase; Short=SVMP; AltName: Full=Vascular apoptosis-inducing protein; Short=VAP; Flags: Precursor [Protobothrops flavoviridis]	360	68147	20	7	4	4	7.8	5.96	5325	1	0	0	604.908	1811.7	3	1811.68	0.0221	0	45.49	0.51	R	QGAQCAEGLCCDQCR	F	4 Carbamidomethyl (C)	0.000010000110010.0	Cmpd 149, AutoMSn(604.9082), 14.1 min
4	gi|82217336	RecName: Full=Zinc metalloproteinase-disintegrin-like HV1; AltName: Full=Snake venom metalloproteinase; Short=SVMP; AltName: Full=Vascular apoptosis-inducing protein; Short=VAP; Flags: Precursor [Protobothrops flavoviridis]	360	68147	20	7	4	4	7.8	5.96	5815	1	0	0	694.635	2080.88	3	2080.87	0.0186	1	85.74	3.6e-05	K	LRQGAQCAEGLCCDQCR	F	4 Carbamidomethyl (C)	0.00000010000110010.0	Cmpd 125, AutoMSn(694.6355), 13.6 min
4	gi|82217336	RecName: Full=Zinc metalloproteinase-disintegrin-like HV1; AltName: Full=Snake venom metalloproteinase; Short=SVMP; AltName: Full=Vascular apoptosis-inducing protein; Short=VAP; Flags: Precursor [Protobothrops flavoviridis]	360	68147	20	7	4	4	7.8	5.96	5816	1	0	0	694.637	2080.89	3	2080.87	0.0236	1	50.36	0.12	K	LRQGAQCAEGLCCDQCR	F	4 Carbamidomethyl (C)	0.00000010000110010.0	Cmpd 127, AutoMSn(694.6371), 13.7 min
4	gi|82217336	RecName: Full=Zinc metalloproteinase-disintegrin-like HV1; AltName: Full=Snake venom metalloproteinase; Short=SVMP; AltName: Full=Vascular apoptosis-inducing protein; Short=VAP; Flags: Precursor [Protobothrops flavoviridis]	360	68147	20	7	4	4	7.8	5.96	6224	1	0	0	1185.99	2369.97	2	2369.97	-0.0033	0	21.35	110	K	ACVMAGTLSCDASYLFSDCSR	Q	3 Carbamidomethyl (C)	0.010000000100000000100.0	Cmpd 584, AutoMSn(1185.9931), 24.0 min
4	gi|82217336	RecName: Full=Zinc metalloproteinase-disintegrin-like HV1; AltName: Full=Snake venom metalloproteinase; Short=SVMP; AltName: Full=Vascular apoptosis-inducing protein; Short=VAP; Flags: Precursor [Protobothrops flavoviridis]	360	68147	20	7	4	4	7.8	5.96	6226	1	0	0	791.006	2370	3	2369.97	0.0216	0	66.47	0.0031	K	ACVMAGTLSCDASYLFSDCSR	Q	3 Carbamidomethyl (C)	0.010000000100000000100.0	Cmpd 585, AutoMSn(791.0061), 24.1 min
4	gi|82217336	RecName: Full=Zinc metalloproteinase-disintegrin-like HV1; AltName: Full=Snake venom metalloproteinase; Short=SVMP; AltName: Full=Vascular apoptosis-inducing protein; Short=VAP; Flags: Precursor [Protobothrops flavoviridis]	360	68147	20	7	4	4	7.8	5.96	6227	1	0	0	791.008	2370	3	2369.97	0.0264	0	73.83	0.00057	K	ACVMAGTLSCDASYLFSDCSR	Q	3 Carbamidomethyl (C)	0.010000000100000000100.0	Cmpd 582, AutoMSn(791.0077), 24.0 min
4	gi|82217336	RecName: Full=Zinc metalloproteinase-disintegrin-like HV1; AltName: Full=Snake venom metalloproteinase; Short=SVMP; AltName: Full=Vascular apoptosis-inducing protein; Short=VAP; Flags: Precursor [Protobothrops flavoviridis]	360	68147	20	7	4	4	7.8	5.96	6228	1	0	0	791.015	2370.02	3	2369.97	0.0479	0	71.03	0.001	K	ACVMAGTLSCDASYLFSDCSR	Q	3 Carbamidomethyl (C)	0.010000000100000000100.0	Cmpd 580, AutoMSn(791.0149), 23.9 min
4	gi|82217336	RecName: Full=Zinc metalloproteinase-disintegrin-like HV1; AltName: Full=Snake venom metalloproteinase; Short=SVMP; AltName: Full=Vascular apoptosis-inducing protein; Short=VAP; Flags: Precursor [Protobothrops flavoviridis]	360	68147	20	7	4	4	7.8	5.96	6251	1	0	0	796.338	2385.99	3	2385.97	0.0222	0	52.81	0.074	K	ACVMAGTLSCDASYLFSDCSR	Q	3 Carbamidomethyl (C); Oxidation (M)	0.010200000100000000100.0	Cmpd 524, AutoMSn(796.3379), 22.6 min
4	gi|82217336	RecName: Full=Zinc metalloproteinase-disintegrin-like HV1; AltName: Full=Snake venom metalloproteinase; Short=SVMP; AltName: Full=Vascular apoptosis-inducing protein; Short=VAP; Flags: Precursor [Protobothrops flavoviridis]	360	68147	20	7	4	4	7.8	5.96	6252	1	0	0	796.34	2386	3	2385.97	0.0289	0	51.37	0.1	K	ACVMAGTLSCDASYLFSDCSR	Q	3 Carbamidomethyl (C); Oxidation (M)	0.010200000100000000100.0	Cmpd 523, AutoMSn(796.3402), 22.5 min	emPAI	0.33
5	gi|3318722	Chain E, Leech-Derived Tryptase InhibitorTRYPSIN COMPLEX	356	23457	58	40	3	3	8.1	8.26	1890	1	1	1	421.423	840.832	2	841.502	-0.6696	0	54.83	0.097	R	VATVSLPR	S			Cmpd 215, AutoMSn(421.4235), 16.2 min
5	gi|3318722	Chain E, Leech-Derived Tryptase InhibitorTRYPSIN COMPLEX	356	23457	58	40	3	3	8.1	8.26	1910	1	1	1	421.758	841.502	2	841.502	0.0001	0	54.72	0.051	R	VATVSLPR	S			Cmpd 51, AutoMSn(421.7584), 16.2 min
5	gi|3318722	Chain E, Leech-Derived Tryptase InhibitorTRYPSIN COMPLEX	356	23457	58	40	3	3	8.1	8.26	1911	1	1	1	421.759	841.504	2	841.502	0.0015	0	55.07	0.047	R	VATVSLPR	S			Cmpd 288, AutoMSn(421.7591), 16.3 min
5	gi|3318722	Chain E, Leech-Derived Tryptase InhibitorTRYPSIN COMPLEX	356	23457	58	40	3	3	8.1	8.26	1912	1	1	1	421.76	841.505	2	841.502	0.0032	0	54.96	0.048	R	VATVSLPR	S			Cmpd 243, AutoMSn(421.7599), 16.3 min
5	gi|3318722	Chain E, Leech-Derived Tryptase InhibitorTRYPSIN COMPLEX	356	23457	58	40	3	3	8.1	8.26	1913	1	1	1	421.76	841.506	2	841.502	0.0041	0	55.13	0.047	R	VATVSLPR	S			Cmpd 236, AutoMSn(421.7604), 16.3 min
5	gi|3318722	Chain E, Leech-Derived Tryptase InhibitorTRYPSIN COMPLEX	356	23457	58	40	3	3	8.1	8.26	1914	1	1	1	421.76	841.506	2	841.502	0.0041	0	55.16	0.046	R	VATVSLPR	S			Cmpd 246, AutoMSn(421.7604), 16.3 min
5	gi|3318722	Chain E, Leech-Derived Tryptase InhibitorTRYPSIN COMPLEX	356	23457	58	40	3	3	8.1	8.26	1915	1	1	1	421.76	841.506	2	841.502	0.0042	0	55.07	0.047	R	VATVSLPR	S			Cmpd 54, AutoMSn(421.7604), 16.3 min
5	gi|3318722	Chain E, Leech-Derived Tryptase InhibitorTRYPSIN COMPLEX	356	23457	58	40	3	3	8.1	8.26	1916	1	1	1	421.76	841.506	2	841.502	0.0043	0	54.93	0.049	R	VATVSLPR	S			Cmpd 234, AutoMSn(421.7605), 16.3 min
5	gi|3318722	Chain E, Leech-Derived Tryptase InhibitorTRYPSIN COMPLEX	356	23457	58	40	3	3	8.1	8.26	1917	1	1	1	421.761	841.507	2	841.502	0.0046	0	55.24	0.045	R	VATVSLPR	S			Cmpd 249, AutoMSn(421.7607), 16.4 min
5	gi|3318722	Chain E, Leech-Derived Tryptase InhibitorTRYPSIN COMPLEX	356	23457	58	40	3	3	8.1	8.26	1918	1	1	1	421.761	841.507	2	841.502	0.0049	0	54.99	0.048	R	VATVSLPR	S			Cmpd 172, AutoMSn(421.7608), 16.2 min
5	gi|3318722	Chain E, Leech-Derived Tryptase InhibitorTRYPSIN COMPLEX	356	23457	58	40	3	3	8.1	8.26	1919	1	1	1	421.761	841.507	2	841.502	0.005	0	55.04	0.048	R	VATVSLPR	S			Cmpd 178, AutoMSn(421.7608), 16.3 min
5	gi|3318722	Chain E, Leech-Derived Tryptase InhibitorTRYPSIN COMPLEX	356	23457	58	40	3	3	8.1	8.26	1920	1	1	1	421.761	841.507	2	841.502	0.005	0	55.15	0.046	R	VATVSLPR	S			Cmpd 175, AutoMSn(421.7609), 16.3 min
5	gi|3318722	Chain E, Leech-Derived Tryptase InhibitorTRYPSIN COMPLEX	356	23457	58	40	3	3	8.1	8.26	1921	1	1	1	421.761	841.507	2	841.502	0.0052	0	55.2	0.046	R	VATVSLPR	S			Cmpd 239, AutoMSn(421.7610), 16.3 min
5	gi|3318722	Chain E, Leech-Derived Tryptase InhibitorTRYPSIN COMPLEX	356	23457	58	40	3	3	8.1	8.26	1922	1	1	1	421.761	841.507	2	841.502	0.0052	0	55.06	0.047	R	VATVSLPR	S			Cmpd 137, AutoMSn(421.7610), 16.2 min
5	gi|3318722	Chain E, Leech-Derived Tryptase InhibitorTRYPSIN COMPLEX	356	23457	58	40	3	3	8.1	8.26	1923	1	1	1	421.761	841.508	2	841.502	0.0054	0	55.09	0.047	R	VATVSLPR	S			Cmpd 235, AutoMSn(421.7610), 16.3 min
5	gi|3318722	Chain E, Leech-Derived Tryptase InhibitorTRYPSIN COMPLEX	356	23457	58	40	3	3	8.1	8.26	1924	1	1	1	421.761	841.508	2	841.502	0.0055	0	41.8	1	R	VATVSLPR	S			Cmpd 216, AutoMSn(421.7611), 16.2 min
5	gi|3318722	Chain E, Leech-Derived Tryptase InhibitorTRYPSIN COMPLEX	356	23457	58	40	3	3	8.1	8.26	1925	1	1	1	421.761	841.508	2	841.502	0.006	0	54.95	0.049	R	VATVSLPR	S			Cmpd 57, AutoMSn(421.7613), 16.4 min
5	gi|3318722	Chain E, Leech-Derived Tryptase InhibitorTRYPSIN COMPLEX	356	23457	58	40	3	3	8.1	8.26	1926	1	1	1	421.761	841.508	2	841.502	0.006	0	55.17	0.046	R	VATVSLPR	S			Cmpd 294, AutoMSn(421.7613), 16.4 min
5	gi|3318722	Chain E, Leech-Derived Tryptase InhibitorTRYPSIN COMPLEX	356	23457	58	40	3	3	8.1	8.26	1927	1	1	1	421.761	841.508	2	841.502	0.006	0	55.04	0.048	R	VATVSLPR	S			Cmpd 140, AutoMSn(421.7613), 16.3 min
5	gi|3318722	Chain E, Leech-Derived Tryptase InhibitorTRYPSIN COMPLEX	356	23457	58	40	3	3	8.1	8.26	1928	1	1	1	421.761	841.508	2	841.502	0.0062	0	55.05	0.047	R	VATVSLPR	S			Cmpd 247, AutoMSn(421.7614), 16.3 min
5	gi|3318722	Chain E, Leech-Derived Tryptase InhibitorTRYPSIN COMPLEX	356	23457	58	40	3	3	8.1	8.26	1929	1	1	1	421.762	841.508	2	841.502	0.0062	0	55.13	0.047	R	VATVSLPR	S			Cmpd 291, AutoMSn(421.7615), 16.3 min
5	gi|3318722	Chain E, Leech-Derived Tryptase InhibitorTRYPSIN COMPLEX	356	23457	58	40	3	3	8.1	8.26	1930	1	1	1	421.762	841.508	2	841.502	0.0063	0	55.01	0.048	R	VATVSLPR	S			Cmpd 242, AutoMSn(421.7615), 16.4 min
5	gi|3318722	Chain E, Leech-Derived Tryptase InhibitorTRYPSIN COMPLEX	356	23457	58	40	3	3	8.1	8.26	1931	1	1	1	421.762	841.509	2	841.502	0.0063	0	55	0.048	R	VATVSLPR	S			Cmpd 277, AutoMSn(421.7615), 16.4 min
5	gi|3318722	Chain E, Leech-Derived Tryptase InhibitorTRYPSIN COMPLEX	356	23457	58	40	3	3	8.1	8.26	1932	1	1	1	421.762	841.509	2	841.502	0.0066	0	55.04	0.048	R	VATVSLPR	S			Cmpd 275, AutoMSn(421.7617), 16.4 min
5	gi|3318722	Chain E, Leech-Derived Tryptase InhibitorTRYPSIN COMPLEX	356	23457	58	40	3	3	8.1	8.26	1933	1	1	1	421.762	841.509	2	841.502	0.0069	0	55.03	0.048	R	VATVSLPR	S			Cmpd 244, AutoMSn(421.7618), 16.3 min
5	gi|3318722	Chain E, Leech-Derived Tryptase InhibitorTRYPSIN COMPLEX	356	23457	58	40	3	3	8.1	8.26	1934	1	1	1	421.762	841.509	2	841.502	0.0069	0	55.17	0.046	R	VATVSLPR	S			Cmpd 219, AutoMSn(421.7618), 16.3 min
5	gi|3318722	Chain E, Leech-Derived Tryptase InhibitorTRYPSIN COMPLEX	356	23457	58	40	3	3	8.1	8.26	1935	1	1	1	421.762	841.509	2	841.502	0.0071	0	54.9	0.049	R	VATVSLPR	S			Cmpd 240, AutoMSn(421.7619), 16.4 min
5	gi|3318722	Chain E, Leech-Derived Tryptase InhibitorTRYPSIN COMPLEX	356	23457	58	40	3	3	8.1	8.26	1936	1	1	1	421.762	841.51	2	841.502	0.0076	0	54.89	0.049	R	VATVSLPR	S			Cmpd 250, AutoMSn(421.7622), 16.4 min
5	gi|3318722	Chain E, Leech-Derived Tryptase InhibitorTRYPSIN COMPLEX	356	23457	58	40	3	3	8.1	8.26	2479	1	1	1	523.283	1044.55	2	1044.56	-0.0042	0	64.52	0.0064	K	LSSPATLNSR	V			Cmpd 105, AutoMSn(523.2834), 14.6 min
5	gi|3318722	Chain E, Leech-Derived Tryptase InhibitorTRYPSIN COMPLEX	356	23457	58	40	3	3	8.1	8.26	2481	1	1	1	523.287	1044.56	2	1044.56	0.0026	0	77.95	0.00029	K	LSSPATLNSR	V			Cmpd 160, AutoMSn(523.2867), 14.7 min
5	gi|3318722	Chain E, Leech-Derived Tryptase InhibitorTRYPSIN COMPLEX	356	23457	58	40	3	3	8.1	8.26	2482	1	1	1	523.287	1044.56	2	1044.56	0.0033	0	64.47	0.0064	K	LSSPATLNSR	V			Cmpd 218, AutoMSn(523.2871), 14.7 min
5	gi|3318722	Chain E, Leech-Derived Tryptase InhibitorTRYPSIN COMPLEX	356	23457	58	40	3	3	8.1	8.26	2483	1	1	1	523.287	1044.56	2	1044.56	0.0038	0	33.83	7.5	K	LSSPATLNSR	V			Cmpd 225, AutoMSn(523.2873), 14.8 min
5	gi|3318722	Chain E, Leech-Derived Tryptase InhibitorTRYPSIN COMPLEX	356	23457	58	40	3	3	8.1	8.26	2484	1	1	1	523.288	1044.56	2	1044.56	0.004	0	72.32	0.0011	K	LSSPATLNSR	V			Cmpd 14, AutoMSn(523.2874), 14.6 min
5	gi|3318722	Chain E, Leech-Derived Tryptase InhibitorTRYPSIN COMPLEX	356	23457	58	40	3	3	8.1	8.26	2485	1	1	1	523.288	1044.56	2	1044.56	0.0042	0	50.26	0.17	K	LSSPATLNSR	V			Cmpd 175, AutoMSn(523.2875), 14.7 min
5	gi|3318722	Chain E, Leech-Derived Tryptase InhibitorTRYPSIN COMPLEX	356	23457	58	40	3	3	8.1	8.26	2486	1	1	1	523.288	1044.56	2	1044.56	0.0043	0	64.89	0.0058	K	LSSPATLNSR	V			Cmpd 164, AutoMSn(523.2876), 14.7 min
5	gi|3318722	Chain E, Leech-Derived Tryptase InhibitorTRYPSIN COMPLEX	356	23457	58	40	3	3	8.1	8.26	2487	1	1	1	523.288	1044.56	2	1044.56	0.0044	0	60.66	0.015	K	LSSPATLNSR	V			Cmpd 179, AutoMSn(523.2877), 14.8 min
5	gi|3318722	Chain E, Leech-Derived Tryptase InhibitorTRYPSIN COMPLEX	356	23457	58	40	3	3	8.1	8.26	2488	1	1	1	523.288	1044.56	2	1044.56	0.0045	0	72.42	0.001	K	LSSPATLNSR	V			Cmpd 15, AutoMSn(523.2877), 14.7 min
5	gi|3318722	Chain E, Leech-Derived Tryptase InhibitorTRYPSIN COMPLEX	356	23457	58	40	3	3	8.1	8.26	2489	1	1	1	523.288	1044.56	2	1044.56	0.0051	0	78.22	0.00027	K	LSSPATLNSR	V			Cmpd 177, AutoMSn(523.2880), 14.8 min
5	gi|3318722	Chain E, Leech-Derived Tryptase InhibitorTRYPSIN COMPLEX	356	23457	58	40	3	3	8.1	8.26	2490	1	1	1	523.288	1044.56	2	1044.56	0.0052	0	58.57	0.025	K	LSSPATLNSR	V			Cmpd 16, AutoMSn(523.2880), 14.7 min
5	gi|3318722	Chain E, Leech-Derived Tryptase InhibitorTRYPSIN COMPLEX	356	23457	58	40	3	3	8.1	8.26	2491	1	1	1	523.288	1044.56	2	1044.56	0.0053	0	53.57	0.079	K	LSSPATLNSR	V			Cmpd 75, AutoMSn(523.2881), 14.6 min
5	gi|3318722	Chain E, Leech-Derived Tryptase InhibitorTRYPSIN COMPLEX	356	23457	58	40	3	3	8.1	8.26	2492	1	1	1	523.288	1044.56	2	1044.56	0.0056	0	51.5	0.13	K	LSSPATLNSR	V			Cmpd 74, AutoMSn(523.2882), 14.6 min
5	gi|3318722	Chain E, Leech-Derived Tryptase InhibitorTRYPSIN COMPLEX	356	23457	58	40	3	3	8.1	8.26	2493	1	1	1	523.288	1044.56	2	1044.56	0.0056	0	53.67	0.077	K	LSSPATLNSR	V			Cmpd 220, AutoMSn(523.2883), 14.7 min
5	gi|3318722	Chain E, Leech-Derived Tryptase InhibitorTRYPSIN COMPLEX	356	23457	58	40	3	3	8.1	8.26	2494	1	1	1	523.288	1044.56	2	1044.56	0.0056	0	64.58	0.0063	K	LSSPATLNSR	V			Cmpd 170, AutoMSn(523.2883), 14.8 min
5	gi|3318722	Chain E, Leech-Derived Tryptase InhibitorTRYPSIN COMPLEX	356	23457	58	40	3	3	8.1	8.26	2495	1	1	1	523.288	1044.56	2	1044.56	0.0059	0	45.42	0.52	K	LSSPATLNSR	V			Cmpd 107, AutoMSn(523.2884), 14.6 min
5	gi|3318722	Chain E, Leech-Derived Tryptase InhibitorTRYPSIN COMPLEX	356	23457	58	40	3	3	8.1	8.26	2496	1	1	1	523.288	1044.56	2	1044.56	0.0062	0	37.39	3.3	K	LSSPATLNSR	V			Cmpd 142, AutoMSn(523.2885), 14.6 min
5	gi|3318722	Chain E, Leech-Derived Tryptase InhibitorTRYPSIN COMPLEX	356	23457	58	40	3	3	8.1	8.26	2497	1	1	1	523.289	1044.56	2	1044.56	0.0066	0	64.5	0.0064	K	LSSPATLNSR	V			Cmpd 163, AutoMSn(523.2888), 14.7 min
5	gi|3318722	Chain E, Leech-Derived Tryptase InhibitorTRYPSIN COMPLEX	356	23457	58	40	3	3	8.1	8.26	2498	1	1	1	523.289	1044.56	2	1044.56	0.0066	0	51.68	0.12	K	LSSPATLNSR	V			Cmpd 13, AutoMSn(523.2888), 14.6 min
5	gi|3318722	Chain E, Leech-Derived Tryptase InhibitorTRYPSIN COMPLEX	356	23457	58	40	3	3	8.1	8.26	2499	1	1	1	523.289	1044.56	2	1044.56	0.0075	0	78.63	0.00025	K	LSSPATLNSR	V			Cmpd 144, AutoMSn(523.2892), 14.6 min
5	gi|3318722	Chain E, Leech-Derived Tryptase InhibitorTRYPSIN COMPLEX	356	23457	58	40	3	3	8.1	8.26	2500	1	1	1	523.289	1044.56	2	1044.56	0.0076	0	53.37	0.083	K	LSSPATLNSR	V			Cmpd 174, AutoMSn(523.2893), 14.7 min
5	gi|3318722	Chain E, Leech-Derived Tryptase InhibitorTRYPSIN COMPLEX	356	23457	58	40	3	3	8.1	8.26	2501	1	1	1	523.289	1044.56	2	1044.56	0.0078	0	44.98	0.57	K	LSSPATLNSR	V			Cmpd 204, AutoMSn(523.2894), 14.8 min
5	gi|3318722	Chain E, Leech-Derived Tryptase InhibitorTRYPSIN COMPLEX	356	23457	58	40	3	3	8.1	8.26	2502	1	1	1	523.289	1044.56	2	1044.56	0.0079	0	40.43	1.6	K	LSSPATLNSR	V			Cmpd 12, AutoMSn(523.2894), 14.6 min
5	gi|3318722	Chain E, Leech-Derived Tryptase InhibitorTRYPSIN COMPLEX	356	23457	58	40	3	3	8.1	8.26	2503	1	1	1	523.29	1044.56	2	1044.56	0.0083	0	64.54	0.0063	K	LSSPATLNSR	V			Cmpd 174, AutoMSn(523.2896), 14.7 min
5	gi|3318722	Chain E, Leech-Derived Tryptase InhibitorTRYPSIN COMPLEX	356	23457	58	40	3	3	8.1	8.26	2504	1	1	1	523.29	1044.56	2	1044.56	0.0085	0	51.11	0.14	K	LSSPATLNSR	V			Cmpd 167, AutoMSn(523.2897), 14.7 min
5	gi|3318722	Chain E, Leech-Derived Tryptase InhibitorTRYPSIN COMPLEX	356	23457	58	40	3	3	8.1	8.26	2505	1	1	1	523.29	1044.57	2	1044.56	0.0091	0	52.82	0.094	K	LSSPATLNSR	V			Cmpd 147, AutoMSn(523.2900), 14.7 min
5	gi|3318722	Chain E, Leech-Derived Tryptase InhibitorTRYPSIN COMPLEX	356	23457	58	40	3	3	8.1	8.26	2509	1	1	1	523.776	1045.54	2	1045.54	-0.0023	0	42.07	1.2	K	LSSPATLDSR	V			Cmpd 137, AutoMSn(523.7763), 15.4 min
5	gi|3318722	Chain E, Leech-Derived Tryptase InhibitorTRYPSIN COMPLEX	356	23457	58	40	3	3	8.1	8.26	2511	1	1	1	523.779	1045.54	2	1045.54	0.0037	0	28.25	28	K	LSSPATLDSR	V			Cmpd 33, AutoMSn(523.7793), 15.4 min
5	gi|3318722	Chain E, Leech-Derived Tryptase InhibitorTRYPSIN COMPLEX	356	23457	58	40	3	3	8.1	8.26	2512	1	1	1	523.781	1045.55	2	1045.54	0.0072	0	55.28	0.056	K	LSSPATLDSR	V			Cmpd 32, AutoMSn(523.7810), 15.3 min
5	gi|3318722	Chain E, Leech-Derived Tryptase InhibitorTRYPSIN COMPLEX	356	23457	58	40	3	3	8.1	8.26	2513	1	1	1	523.786	1045.56	2	1045.54	0.0169	0	40.08	1.9	K	LSSPATLDSR	V			Cmpd 103, AutoMSn(523.7859), 15.4 min	emPAI	0.49
6	gi|11935049	keratin 1 [Homo sapiens]	338	66027	52	15	13	7	22.7	8.16	2017	1	1	0	437.754	873.494	2	873.492	0.002	0	39.78	2.2	R	SLVNLGGSK	S			Cmpd 214, AutoMSn(437.7543), 16.2 min
6	gi|11935049	keratin 1 [Homo sapiens]	338	66027	52	15	13	7	22.7	8.16	2018	1	1	0	437.754	873.494	2	873.492	0.0022	0	34.71	7.1	R	SLVNLGGSK	S			Cmpd 242, AutoMSn(437.7544), 16.2 min
6	gi|11935049	keratin 1 [Homo sapiens]	338	66027	52	15	13	7	22.7	8.16	2426	1	1	0	517.262	1032.51	2	1032.51	0	0	40.19	1.8	R	TLLEGEESR	M			Cmpd 115, AutoMSn(517.2616), 14.8 min
6	gi|11935049	keratin 1 [Homo sapiens]	338	66027	52	15	13	7	22.7	8.16	2427	1	1	0	517.263	1032.51	2	1032.51	0.0031	0	30.45	17	R	TLLEGEESR	M			Cmpd 18, AutoMSn(517.2632), 14.8 min
6	gi|11935049	keratin 1 [Homo sapiens]	338	66027	52	15	13	7	22.7	8.16	2428	1	1	0	517.263	1032.51	2	1032.51	0.0032	0	59.02	0.024	R	TLLEGEESR	M			Cmpd 181, AutoMSn(517.2632), 14.9 min
6	gi|11935049	keratin 1 [Homo sapiens]	338	66027	52	15	13	7	22.7	8.16	2429	1	1	0	517.263	1032.51	2	1032.51	0.0034	0	55.38	0.055	R	TLLEGEESR	M			Cmpd 150, AutoMSn(517.2633), 14.8 min
6	gi|11935049	keratin 1 [Homo sapiens]	338	66027	52	15	13	7	22.7	8.16	2430	1	1	0	517.264	1032.51	2	1032.51	0.0047	0	58.91	0.024	R	TLLEGEESR	M			Cmpd 178, AutoMSn(517.2640), 14.8 min
6	gi|11935049	keratin 1 [Homo sapiens]	338	66027	52	15	13	7	22.7	8.16	2432	1	1	0	517.265	1032.52	2	1032.51	0.0077	0	33.81	7.8	R	TLLEGEESR	M			Cmpd 157, AutoMSn(517.2655), 14.9 min
6	gi|11935049	keratin 1 [Homo sapiens]	338	66027	52	15	13	7	22.7	8.16	2433	1	1	0	517.266	1032.52	2	1032.51	0.008	0	21.02	150	R	TLLEGEESR	M			Cmpd 80, AutoMSn(517.2656), 14.8 min
6	gi|11935049	keratin 1 [Homo sapiens]	338	66027	52	15	13	7	22.7	8.16	2612	1	1	0	533.268	1064.52	2	1064.51	0.0074	0	27.36	31	K	AQYEDIAQK	S			Cmpd 140, AutoMSn(533.2679), 13.9 min
6	gi|11935049	keratin 1 [Homo sapiens]	338	66027	52	15	13	7	22.7	8.16	2613	1	1	0	533.268	1064.52	2	1064.51	0.0075	0	29.82	17	K	AQYEDIAQK	S			Cmpd 109, AutoMSn(533.2679), 13.8 min
6	gi|11935049	keratin 1 [Homo sapiens]	338	66027	52	15	13	7	22.7	8.16	2614	1	1	0	533.269	1064.52	2	1064.51	0.0085	0	25.16	51	K	AQYEDIAQK	S			Cmpd 113, AutoMSn(533.2684), 13.9 min
6	gi|11935049	keratin 1 [Homo sapiens]	338	66027	52	15	13	7	22.7	8.16	2615	4	1	0	533.269	1064.52	2	1064.51	0.0102	0	12.78	870	K	AQYEDIAQK	S			Cmpd 55, AutoMSn(533.2693), 13.9 min
6	gi|11935049	keratin 1 [Homo sapiens]	338	66027	52	15	13	7	22.7	8.16	3087	1	1	0	590.305	1178.59	2	1178.59	0.0016	0	21.63	110	K	YEELQITAGR	H			Cmpd 273, AutoMSn(590.3046), 17.5 min
6	gi|11935049	keratin 1 [Homo sapiens]	338	66027	52	15	13	7	22.7	8.16	3089	1	1	0	590.307	1178.6	2	1178.59	0.0061	0	51.09	0.13	K	YEELQITAGR	H			Cmpd 302, AutoMSn(590.3069), 17.6 min
6	gi|11935049	keratin 1 [Homo sapiens]	338	66027	52	15	13	7	22.7	8.16	3517	1	1	0	651.862	1301.71	2	1301.71	0.0016	0	51.26	0.12	R	SLDLDSIIAEVK	A			Cmpd 597, AutoMSn(651.8620), 26.0 min
6	gi|11935049	keratin 1 [Homo sapiens]	338	66027	52	15	13	7	22.7	8.16	3520	1	1	0	651.864	1301.71	2	1301.71	0.0046	0	55.33	0.047	R	SLDLDSIIAEVK	A			Cmpd 416, AutoMSn(651.8635), 25.9 min
6	gi|11935049	keratin 1 [Homo sapiens]	338	66027	52	15	13	7	22.7	8.16	3522	1	1	0	651.864	1301.71	2	1301.71	0.0057	0	68.08	0.0025	R	SLDLDSIIAEVK	A			Cmpd 654, AutoMSn(651.8640), 26.0 min
6	gi|11935049	keratin 1 [Homo sapiens]	338	66027	52	15	13	7	22.7	8.16	3523	1	1	0	651.864	1301.71	2	1301.71	0.0059	0	33	8	R	SLDLDSIIAEVK	A			Cmpd 594, AutoMSn(651.8641), 25.9 min
6	gi|11935049	keratin 1 [Homo sapiens]	338	66027	52	15	13	7	22.7	8.16	3525	1	1	0	651.865	1301.71	2	1301.71	0.0068	0	73.31	0.00074	R	SLDLDSIIAEVK	A			Cmpd 651, AutoMSn(651.8646), 25.9 min
6	gi|11935049	keratin 1 [Homo sapiens]	338	66027	52	15	13	7	22.7	8.16	3528	1	1	0	651.866	1301.72	2	1301.71	0.0092	0	21.91	100	R	SLDLDSIIAEVK	A			Cmpd 658, AutoMSn(651.8658), 25.9 min
6	gi|11935049	keratin 1 [Homo sapiens]	338	66027	52	15	13	7	22.7	8.16	3529	1	1	0	651.866	1301.72	2	1301.71	0.0095	0	38.59	2.2	R	SLDLDSIIAEVK	A			Cmpd 591, AutoMSn(651.8659), 25.8 min
6	gi|11935049	keratin 1 [Homo sapiens]	338	66027	52	15	13	7	22.7	8.16	3531	4	1	0	651.868	1301.72	2	1301.71	0.0137	0	23.39	73	R	SLDLDSIIAEVK	A			Cmpd 648, AutoMSn(651.8680), 25.8 min
6	gi|11935049	keratin 1 [Homo sapiens]	338	66027	52	15	13	7	22.7	8.16	4095	1	1	0	465.254	1392.74	3	1392.72	0.0159	1	78.52	0.00022	R	TNAENEFVTIKK	D			Cmpd 198, AutoMSn(465.2542), 15.2 min
6	gi|11935049	keratin 1 [Homo sapiens]	338	66027	52	15	13	7	22.7	8.16	4096	3	1	0	465.255	1392.74	3	1392.72	0.0176	1	18.04	240	R	TNAENEFVTIKK	D			Cmpd 95, AutoMSn(465.2548), 15.2 min
6	gi|11935049	keratin 1 [Homo sapiens]	338	66027	52	15	13	7	22.7	8.16	4097	1	1	0	465.255	1392.74	3	1392.72	0.018	1	33.84	6.4	R	TNAENEFVTIKK	D			Cmpd 168, AutoMSn(465.2549), 15.2 min
6	gi|11935049	keratin 1 [Homo sapiens]	338	66027	52	15	13	7	22.7	8.16	4098	1	1	0	465.256	1392.75	3	1392.72	0.0217	1	30.37	14	R	TNAENEFVTIKK	D			Cmpd 201, AutoMSn(465.2561), 15.3 min
6	gi|11935049	keratin 1 [Homo sapiens]	338	66027	52	15	13	7	22.7	8.16	4274	2	1	0	738.374	1474.73	2	1474.74	-0.0076	0	19.35	170	K	WELLQQVDTSTR	T			Cmpd 297, AutoMSn(738.3743), 21.6 min
6	gi|11935049	keratin 1 [Homo sapiens]	338	66027	52	15	13	7	22.7	8.16	4276	1	1	0	738.378	1474.74	2	1474.74	0.0004	0	57.41	0.027	K	WELLQQVDTSTR	T			Cmpd 450, AutoMSn(738.3783), 21.6 min
6	gi|11935049	keratin 1 [Homo sapiens]	338	66027	52	15	13	7	22.7	8.16	4277	1	1	0	738.381	1474.75	2	1474.74	0.0063	0	53.21	0.072	K	WELLQQVDTSTR	T			Cmpd 484, AutoMSn(738.3812), 21.7 min
6	gi|11935049	keratin 1 [Homo sapiens]	338	66027	52	15	13	7	22.7	8.16	4279	1	1	0	738.383	1474.75	2	1474.74	0.0088	0	58.7	0.02	K	WELLQQVDTSTR	T			Cmpd 447, AutoMSn(738.3825), 21.5 min
6	gi|11935049	keratin 1 [Homo sapiens]	338	66027	52	15	13	7	22.7	8.16	4280	1	1	0	738.384	1474.75	2	1474.74	0.0119	0	65.08	0.0047	K	WELLQQVDTSTR	T			Cmpd 481, AutoMSn(738.3840), 21.6 min
6	gi|11935049	keratin 1 [Homo sapiens]	338	66027	52	15	13	7	22.7	8.16	4281	1	1	0	738.384	1474.75	2	1474.74	0.0123	0	32.24	9	K	WELLQQVDTSTR	T			Cmpd 478, AutoMSn(738.3842), 21.5 min
6	gi|11935049	keratin 1 [Homo sapiens]	338	66027	52	15	13	7	22.7	8.16	4283	1	1	0	738.398	1474.78	2	1474.78	0.0035	0	70.68	0.0013	R	FLEQQNQVLQTK	W			Cmpd 272, AutoMSn(738.3980), 17.5 min
6	gi|11935049	keratin 1 [Homo sapiens]	338	66027	52	15	13	7	22.7	8.16	4285	1	1	0	738.401	1474.79	2	1474.78	0.009	0	50.71	0.13	R	FLEQQNQVLQTK	W			Cmpd 275, AutoMSn(738.4008), 17.6 min
6	gi|11935049	keratin 1 [Homo sapiens]	338	66027	52	15	13	7	22.7	8.16	4286	1	1	0	738.401	1474.79	2	1474.78	0.0091	0	83.5	6.8e-05	R	FLEQQNQVLQTK	W			Cmpd 301, AutoMSn(738.4008), 17.6 min
6	gi|11935049	keratin 1 [Homo sapiens]	338	66027	52	15	13	7	22.7	8.16	4287	6	1	0	738.401	1474.79	2	1474.78	0.0093	0	16.59	340	R	FLEQQNQVLQTK	W			Cmpd 186, AutoMSn(738.4009), 17.5 min
6	gi|11935049	keratin 1 [Homo sapiens]	338	66027	52	15	13	7	22.7	8.16	4683	1	1	0	546.733	1637.18	3	1637.85	-0.6765	1	49.78	0.29	K	SLNNQFASFIDKVR	F			Cmpd 471, AutoMSn(546.7326), 21.4 min
6	gi|11935049	keratin 1 [Homo sapiens]	338	66027	52	15	13	7	22.7	8.16	4686	1	1	0	546.96	1637.86	3	1637.85	0.0056	1	39.25	1.7	K	SLNNQFASFIDKVR	F			Cmpd 472, AutoMSn(546.9600), 21.4 min
6	gi|11935049	keratin 1 [Homo sapiens]	338	66027	52	15	13	7	22.7	8.16	4687	2	1	0	546.961	1637.86	3	1637.85	0.0075	1	30.29	13	K	SLNNQFASFIDKVR	F			Cmpd 350, AutoMSn(546.9606), 21.4 min
6	gi|11935049	keratin 1 [Homo sapiens]	338	66027	52	15	13	7	22.7	8.16	4688	1	1	0	546.963	1637.87	3	1637.85	0.0152	1	82.08	8.8e-05	K	SLNNQFASFIDKVR	F			Cmpd 439, AutoMSn(546.9632), 21.3 min
6	gi|11935049	keratin 1 [Homo sapiens]	338	66027	52	15	13	7	22.7	8.16	4689	1	1	0	546.964	1637.87	3	1637.85	0.0185	1	36.51	3.2	K	SLNNQFASFIDKVR	F			Cmpd 477, AutoMSn(546.9643), 21.5 min
6	gi|11935049	keratin 1 [Homo sapiens]	338	66027	52	15	13	7	22.7	8.16	4693	1	1	0	546.966	1637.88	3	1637.85	0.0251	1	33.75	6	K	SLNNQFASFIDKVR	F			Cmpd 285, AutoMSn(546.9665), 21.3 min
6	gi|11935049	keratin 1 [Homo sapiens]	338	66027	52	15	13	7	22.7	8.16	4694	1	1	0	547.154	1638.44	3	1637.85	0.5866	1	57.91	0.043	K	SLNNQFASFIDKVR	F			Cmpd 442, AutoMSn(547.1536), 21.4 min
6	gi|11935049	keratin 1 [Homo sapiens]	338	66027	52	15	13	7	22.7	8.16	5653	1	1	0	665.335	1992.98	3	1992.97	0.0133	0	18.56	170	R	THNLEPYFESFINNLR	R			Cmpd 600, AutoMSn(665.3348), 24.5 min
6	gi|11935049	keratin 1 [Homo sapiens]	338	66027	52	15	13	7	22.7	8.16	5654	1	1	0	665.337	1992.99	3	1992.97	0.0185	0	70.69	0.001	R	THNLEPYFESFINNLR	R			Cmpd 596, AutoMSn(665.3366), 24.4 min
6	gi|11935049	keratin 1 [Homo sapiens]	338	66027	52	15	13	7	22.7	8.16	5655	1	1	0	665.348	1993.02	3	1992.97	0.0535	0	20.41	110	R	THNLEPYFESFINNLR	R			Cmpd 549, AutoMSn(665.3482), 24.4 min
6	gi|11935049	keratin 1 [Homo sapiens]	338	66027	52	15	13	7	22.7	8.16	6187	1	1	1	783.75	2348.23	3	2348.21	0.0176	1	33.61	5.1	R	SLDLDSIIAEVKAQYEDIAQK	S			Cmpd 731, AutoMSn(783.7502), 28.9 min
6	gi|11935049	keratin 1 [Homo sapiens]	338	66027	52	15	13	7	22.7	8.16	6189	4	1	1	783.752	2348.23	3	2348.21	0.0226	1	21.64	81	R	SLDLDSIIAEVKAQYEDIAQK	S			Cmpd 736, AutoMSn(783.7518), 29.1 min
6	gi|11935049	keratin 1 [Homo sapiens]	338	66027	52	15	13	7	22.7	8.16	6241	2	1	0	795.329	2382.96	3	2382.94	0.0203	0	29.49	18	R	GGGGGGYGSGGSSYGSGGGSYGSGGGGGGGR	G			Cmpd 104, AutoMSn(795.3289), 13.7 min
6	gi|11935049	keratin 1 [Homo sapiens]	338	66027	52	15	13	7	22.7	8.16	6244	5	1	0	795.331	2382.97	3	2382.94	0.0273	0	25.45	44	R	GGGGGGYGSGGSSYGSGGGSYGSGGGGGGGR	G			Cmpd 9, AutoMSn(795.3313), 13.7 min
6	gi|11935049	keratin 1 [Homo sapiens]	338	66027	52	15	13	7	22.7	8.16	6556	1	1	0	978.182	2931.52	3	2931.51	0.0153	1	32.94	5.1	R	FLEQQNQVLQTKWELLQQVDTSTR	T			Cmpd 557, AutoMSn(978.1820), 23.4 min	emPAI	0.55
7	gi|635065498	PREDICTED: keratin, type II cytoskeletal 1 [Chlorocebus sabaeus]	338	67394	46	15	11	7	20.6	8.43	2017	1	0	0	437.754	873.494	2	873.492	0.002	0	39.78	2.2	R	SLVNLGGSK	S			Cmpd 214, AutoMSn(437.7543), 16.2 min
7	gi|635065498	PREDICTED: keratin, type II cytoskeletal 1 [Chlorocebus sabaeus]	338	67394	46	15	11	7	20.6	8.43	2018	1	0	0	437.754	873.494	2	873.492	0.0022	0	34.71	7.1	R	SLVNLGGSK	S			Cmpd 242, AutoMSn(437.7544), 16.2 min
7	gi|635065498	PREDICTED: keratin, type II cytoskeletal 1 [Chlorocebus sabaeus]	338	67394	46	15	11	7	20.6	8.43	2426	1	0	0	517.262	1032.51	2	1032.51	0	0	40.19	1.8	R	TLLEGEESR	M			Cmpd 115, AutoMSn(517.2616), 14.8 min
7	gi|635065498	PREDICTED: keratin, type II cytoskeletal 1 [Chlorocebus sabaeus]	338	67394	46	15	11	7	20.6	8.43	2427	1	0	0	517.263	1032.51	2	1032.51	0.0031	0	30.45	17	R	TLLEGEESR	M			Cmpd 18, AutoMSn(517.2632), 14.8 min
7	gi|635065498	PREDICTED: keratin, type II cytoskeletal 1 [Chlorocebus sabaeus]	338	67394	46	15	11	7	20.6	8.43	2428	1	0	0	517.263	1032.51	2	1032.51	0.0032	0	59.02	0.024	R	TLLEGEESR	M			Cmpd 181, AutoMSn(517.2632), 14.9 min
7	gi|635065498	PREDICTED: keratin, type II cytoskeletal 1 [Chlorocebus sabaeus]	338	67394	46	15	11	7	20.6	8.43	2429	1	0	0	517.263	1032.51	2	1032.51	0.0034	0	55.38	0.055	R	TLLEGEESR	M			Cmpd 150, AutoMSn(517.2633), 14.8 min
7	gi|635065498	PREDICTED: keratin, type II cytoskeletal 1 [Chlorocebus sabaeus]	338	67394	46	15	11	7	20.6	8.43	2430	1	0	0	517.264	1032.51	2	1032.51	0.0047	0	58.91	0.024	R	TLLEGEESR	M			Cmpd 178, AutoMSn(517.2640), 14.8 min
7	gi|635065498	PREDICTED: keratin, type II cytoskeletal 1 [Chlorocebus sabaeus]	338	67394	46	15	11	7	20.6	8.43	2432	1	0	0	517.265	1032.52	2	1032.51	0.0077	0	33.81	7.8	R	TLLEGEESR	M			Cmpd 157, AutoMSn(517.2655), 14.9 min
7	gi|635065498	PREDICTED: keratin, type II cytoskeletal 1 [Chlorocebus sabaeus]	338	67394	46	15	11	7	20.6	8.43	2433	1	0	0	517.266	1032.52	2	1032.51	0.008	0	21.02	150	R	TLLEGEESR	M			Cmpd 80, AutoMSn(517.2656), 14.8 min
7	gi|635065498	PREDICTED: keratin, type II cytoskeletal 1 [Chlorocebus sabaeus]	338	67394	46	15	11	7	20.6	8.43	3087	1	0	0	590.305	1178.59	2	1178.59	0.0016	0	21.63	110	K	YEELQITAGR	H			Cmpd 273, AutoMSn(590.3046), 17.5 min
7	gi|635065498	PREDICTED: keratin, type II cytoskeletal 1 [Chlorocebus sabaeus]	338	67394	46	15	11	7	20.6	8.43	3089	1	0	0	590.307	1178.6	2	1178.59	0.0061	0	51.09	0.13	K	YEELQITAGR	H			Cmpd 302, AutoMSn(590.3069), 17.6 min
7	gi|635065498	PREDICTED: keratin, type II cytoskeletal 1 [Chlorocebus sabaeus]	338	67394	46	15	11	7	20.6	8.43	3517	1	0	0	651.862	1301.71	2	1301.71	0.0016	0	51.26	0.12	R	SLDLDSIIAEVK	A			Cmpd 597, AutoMSn(651.8620), 26.0 min
7	gi|635065498	PREDICTED: keratin, type II cytoskeletal 1 [Chlorocebus sabaeus]	338	67394	46	15	11	7	20.6	8.43	3520	1	0	0	651.864	1301.71	2	1301.71	0.0046	0	55.33	0.047	R	SLDLDSIIAEVK	A			Cmpd 416, AutoMSn(651.8635), 25.9 min
7	gi|635065498	PREDICTED: keratin, type II cytoskeletal 1 [Chlorocebus sabaeus]	338	67394	46	15	11	7	20.6	8.43	3522	1	0	0	651.864	1301.71	2	1301.71	0.0057	0	68.08	0.0025	R	SLDLDSIIAEVK	A			Cmpd 654, AutoMSn(651.8640), 26.0 min
7	gi|635065498	PREDICTED: keratin, type II cytoskeletal 1 [Chlorocebus sabaeus]	338	67394	46	15	11	7	20.6	8.43	3523	1	0	0	651.864	1301.71	2	1301.71	0.0059	0	33	8	R	SLDLDSIIAEVK	A			Cmpd 594, AutoMSn(651.8641), 25.9 min
7	gi|635065498	PREDICTED: keratin, type II cytoskeletal 1 [Chlorocebus sabaeus]	338	67394	46	15	11	7	20.6	8.43	3525	1	0	0	651.865	1301.71	2	1301.71	0.0068	0	73.31	0.00074	R	SLDLDSIIAEVK	A			Cmpd 651, AutoMSn(651.8646), 25.9 min
7	gi|635065498	PREDICTED: keratin, type II cytoskeletal 1 [Chlorocebus sabaeus]	338	67394	46	15	11	7	20.6	8.43	3528	1	0	0	651.866	1301.72	2	1301.71	0.0092	0	21.91	100	R	SLDLDSIIAEVK	A			Cmpd 658, AutoMSn(651.8658), 25.9 min
7	gi|635065498	PREDICTED: keratin, type II cytoskeletal 1 [Chlorocebus sabaeus]	338	67394	46	15	11	7	20.6	8.43	3529	1	0	0	651.866	1301.72	2	1301.71	0.0095	0	38.59	2.2	R	SLDLDSIIAEVK	A			Cmpd 591, AutoMSn(651.8659), 25.8 min
7	gi|635065498	PREDICTED: keratin, type II cytoskeletal 1 [Chlorocebus sabaeus]	338	67394	46	15	11	7	20.6	8.43	3531	4	0	0	651.868	1301.72	2	1301.71	0.0137	0	23.39	73	R	SLDLDSIIAEVK	A			Cmpd 648, AutoMSn(651.8680), 25.8 min
7	gi|635065498	PREDICTED: keratin, type II cytoskeletal 1 [Chlorocebus sabaeus]	338	67394	46	15	11	7	20.6	8.43	4095	1	0	0	465.254	1392.74	3	1392.72	0.0159	1	78.52	0.00022	R	TNAENEFVTIKK	D			Cmpd 198, AutoMSn(465.2542), 15.2 min
7	gi|635065498	PREDICTED: keratin, type II cytoskeletal 1 [Chlorocebus sabaeus]	338	67394	46	15	11	7	20.6	8.43	4096	3	0	0	465.255	1392.74	3	1392.72	0.0176	1	18.04	240	R	TNAENEFVTIKK	D			Cmpd 95, AutoMSn(465.2548), 15.2 min
7	gi|635065498	PREDICTED: keratin, type II cytoskeletal 1 [Chlorocebus sabaeus]	338	67394	46	15	11	7	20.6	8.43	4097	1	0	0	465.255	1392.74	3	1392.72	0.018	1	33.84	6.4	R	TNAENEFVTIKK	D			Cmpd 168, AutoMSn(465.2549), 15.2 min
7	gi|635065498	PREDICTED: keratin, type II cytoskeletal 1 [Chlorocebus sabaeus]	338	67394	46	15	11	7	20.6	8.43	4098	1	0	0	465.256	1392.75	3	1392.72	0.0217	1	30.37	14	R	TNAENEFVTIKK	D			Cmpd 201, AutoMSn(465.2561), 15.3 min
7	gi|635065498	PREDICTED: keratin, type II cytoskeletal 1 [Chlorocebus sabaeus]	338	67394	46	15	11	7	20.6	8.43	4274	2	0	0	738.374	1474.73	2	1474.74	-0.0076	0	19.35	170	K	WELLQQVDTSTR	T			Cmpd 297, AutoMSn(738.3743), 21.6 min
7	gi|635065498	PREDICTED: keratin, type II cytoskeletal 1 [Chlorocebus sabaeus]	338	67394	46	15	11	7	20.6	8.43	4276	1	0	0	738.378	1474.74	2	1474.74	0.0004	0	57.41	0.027	K	WELLQQVDTSTR	T			Cmpd 450, AutoMSn(738.3783), 21.6 min
7	gi|635065498	PREDICTED: keratin, type II cytoskeletal 1 [Chlorocebus sabaeus]	338	67394	46	15	11	7	20.6	8.43	4277	1	0	0	738.381	1474.75	2	1474.74	0.0063	0	53.21	0.072	K	WELLQQVDTSTR	T			Cmpd 484, AutoMSn(738.3812), 21.7 min
7	gi|635065498	PREDICTED: keratin, type II cytoskeletal 1 [Chlorocebus sabaeus]	338	67394	46	15	11	7	20.6	8.43	4279	1	0	0	738.383	1474.75	2	1474.74	0.0088	0	58.7	0.02	K	WELLQQVDTSTR	T			Cmpd 447, AutoMSn(738.3825), 21.5 min
7	gi|635065498	PREDICTED: keratin, type II cytoskeletal 1 [Chlorocebus sabaeus]	338	67394	46	15	11	7	20.6	8.43	4280	1	0	0	738.384	1474.75	2	1474.74	0.0119	0	65.08	0.0047	K	WELLQQVDTSTR	T			Cmpd 481, AutoMSn(738.3840), 21.6 min
7	gi|635065498	PREDICTED: keratin, type II cytoskeletal 1 [Chlorocebus sabaeus]	338	67394	46	15	11	7	20.6	8.43	4281	1	0	0	738.384	1474.75	2	1474.74	0.0123	0	32.24	9	K	WELLQQVDTSTR	T			Cmpd 478, AutoMSn(738.3842), 21.5 min
7	gi|635065498	PREDICTED: keratin, type II cytoskeletal 1 [Chlorocebus sabaeus]	338	67394	46	15	11	7	20.6	8.43	4283	1	0	0	738.398	1474.78	2	1474.78	0.0035	0	70.68	0.0013	R	FLEQQNQVLQTK	W			Cmpd 272, AutoMSn(738.3980), 17.5 min
7	gi|635065498	PREDICTED: keratin, type II cytoskeletal 1 [Chlorocebus sabaeus]	338	67394	46	15	11	7	20.6	8.43	4285	1	0	0	738.401	1474.79	2	1474.78	0.009	0	50.71	0.13	R	FLEQQNQVLQTK	W			Cmpd 275, AutoMSn(738.4008), 17.6 min
7	gi|635065498	PREDICTED: keratin, type II cytoskeletal 1 [Chlorocebus sabaeus]	338	67394	46	15	11	7	20.6	8.43	4286	1	0	0	738.401	1474.79	2	1474.78	0.0091	0	83.5	6.8e-05	R	FLEQQNQVLQTK	W			Cmpd 301, AutoMSn(738.4008), 17.6 min
7	gi|635065498	PREDICTED: keratin, type II cytoskeletal 1 [Chlorocebus sabaeus]	338	67394	46	15	11	7	20.6	8.43	4287	6	0	0	738.401	1474.79	2	1474.78	0.0093	0	16.59	340	R	FLEQQNQVLQTK	W			Cmpd 186, AutoMSn(738.4009), 17.5 min
7	gi|635065498	PREDICTED: keratin, type II cytoskeletal 1 [Chlorocebus sabaeus]	338	67394	46	15	11	7	20.6	8.43	4683	1	0	0	546.733	1637.18	3	1637.85	-0.6765	1	49.78	0.29	K	SLNNQFASFIDKVR	F			Cmpd 471, AutoMSn(546.7326), 21.4 min
7	gi|635065498	PREDICTED: keratin, type II cytoskeletal 1 [Chlorocebus sabaeus]	338	67394	46	15	11	7	20.6	8.43	4686	1	0	0	546.96	1637.86	3	1637.85	0.0056	1	39.25	1.7	K	SLNNQFASFIDKVR	F			Cmpd 472, AutoMSn(546.9600), 21.4 min
7	gi|635065498	PREDICTED: keratin, type II cytoskeletal 1 [Chlorocebus sabaeus]	338	67394	46	15	11	7	20.6	8.43	4687	2	0	0	546.961	1637.86	3	1637.85	0.0075	1	30.29	13	K	SLNNQFASFIDKVR	F			Cmpd 350, AutoMSn(546.9606), 21.4 min
7	gi|635065498	PREDICTED: keratin, type II cytoskeletal 1 [Chlorocebus sabaeus]	338	67394	46	15	11	7	20.6	8.43	4688	1	0	0	546.963	1637.87	3	1637.85	0.0152	1	82.08	8.8e-05	K	SLNNQFASFIDKVR	F			Cmpd 439, AutoMSn(546.9632), 21.3 min
7	gi|635065498	PREDICTED: keratin, type II cytoskeletal 1 [Chlorocebus sabaeus]	338	67394	46	15	11	7	20.6	8.43	4689	1	0	0	546.964	1637.87	3	1637.85	0.0185	1	36.51	3.2	K	SLNNQFASFIDKVR	F			Cmpd 477, AutoMSn(546.9643), 21.5 min
7	gi|635065498	PREDICTED: keratin, type II cytoskeletal 1 [Chlorocebus sabaeus]	338	67394	46	15	11	7	20.6	8.43	4693	1	0	0	546.966	1637.88	3	1637.85	0.0251	1	33.75	6	K	SLNNQFASFIDKVR	F			Cmpd 285, AutoMSn(546.9665), 21.3 min
7	gi|635065498	PREDICTED: keratin, type II cytoskeletal 1 [Chlorocebus sabaeus]	338	67394	46	15	11	7	20.6	8.43	4694	1	0	0	547.154	1638.44	3	1637.85	0.5866	1	57.91	0.043	K	SLNNQFASFIDKVR	F			Cmpd 442, AutoMSn(547.1536), 21.4 min
7	gi|635065498	PREDICTED: keratin, type II cytoskeletal 1 [Chlorocebus sabaeus]	338	67394	46	15	11	7	20.6	8.43	5653	1	0	0	665.335	1992.98	3	1992.97	0.0133	0	18.56	170	R	THNLEPYFESFINNLR	R			Cmpd 600, AutoMSn(665.3348), 24.5 min
7	gi|635065498	PREDICTED: keratin, type II cytoskeletal 1 [Chlorocebus sabaeus]	338	67394	46	15	11	7	20.6	8.43	5654	1	0	0	665.337	1992.99	3	1992.97	0.0185	0	70.69	0.001	R	THNLEPYFESFINNLR	R			Cmpd 596, AutoMSn(665.3366), 24.4 min
7	gi|635065498	PREDICTED: keratin, type II cytoskeletal 1 [Chlorocebus sabaeus]	338	67394	46	15	11	7	20.6	8.43	5655	1	0	0	665.348	1993.02	3	1992.97	0.0535	0	20.41	110	R	THNLEPYFESFINNLR	R			Cmpd 549, AutoMSn(665.3482), 24.4 min
7	gi|635065498	PREDICTED: keratin, type II cytoskeletal 1 [Chlorocebus sabaeus]	338	67394	46	15	11	7	20.6	8.43	6241	2	0	1	795.329	2382.96	3	2382.94	0.0203	0	29.49	18	R	GGGGGGYSSGGGSYGSGGGSYGSGGGGGGGR	G			Cmpd 104, AutoMSn(795.3289), 13.7 min
7	gi|635065498	PREDICTED: keratin, type II cytoskeletal 1 [Chlorocebus sabaeus]	338	67394	46	15	11	7	20.6	8.43	6244	5	0	1	795.331	2382.97	3	2382.94	0.0273	0	25.45	44	R	GGGGGGYSSGGGSYGSGGGSYGSGGGGGGGR	G			Cmpd 9, AutoMSn(795.3313), 13.7 min
7	gi|635065498	PREDICTED: keratin, type II cytoskeletal 1 [Chlorocebus sabaeus]	338	67394	46	15	11	7	20.6	8.43	6556	1	0	0	978.182	2931.52	3	2931.51	0.0153	1	32.94	5.1	R	FLEQQNQVLQTKWELLQQVDTSTR	T			Cmpd 557, AutoMSn(978.1820), 23.4 min	emPAI	0.53
8	gi|375314779	keratin 1 [Homo sapiens]	314	66026	44	12	12	6	22.7	8.15	2017	1	0	0	437.754	873.494	2	873.492	0.002	0	39.78	2.2	R	SLVNLGGSK	S			Cmpd 214, AutoMSn(437.7543), 16.2 min
8	gi|375314779	keratin 1 [Homo sapiens]	314	66026	44	12	12	6	22.7	8.15	2018	1	0	0	437.754	873.494	2	873.492	0.0022	0	34.71	7.1	R	SLVNLGGSK	S			Cmpd 242, AutoMSn(437.7544), 16.2 min
8	gi|375314779	keratin 1 [Homo sapiens]	314	66026	44	12	12	6	22.7	8.15	2426	1	0	0	517.262	1032.51	2	1032.51	0	0	40.19	1.8	R	TLLEGEESR	M			Cmpd 115, AutoMSn(517.2616), 14.8 min
8	gi|375314779	keratin 1 [Homo sapiens]	314	66026	44	12	12	6	22.7	8.15	2427	1	0	0	517.263	1032.51	2	1032.51	0.0031	0	30.45	17	R	TLLEGEESR	M			Cmpd 18, AutoMSn(517.2632), 14.8 min
8	gi|375314779	keratin 1 [Homo sapiens]	314	66026	44	12	12	6	22.7	8.15	2428	1	0	0	517.263	1032.51	2	1032.51	0.0032	0	59.02	0.024	R	TLLEGEESR	M			Cmpd 181, AutoMSn(517.2632), 14.9 min
8	gi|375314779	keratin 1 [Homo sapiens]	314	66026	44	12	12	6	22.7	8.15	2429	1	0	0	517.263	1032.51	2	1032.51	0.0034	0	55.38	0.055	R	TLLEGEESR	M			Cmpd 150, AutoMSn(517.2633), 14.8 min
8	gi|375314779	keratin 1 [Homo sapiens]	314	66026	44	12	12	6	22.7	8.15	2430	1	0	0	517.264	1032.51	2	1032.51	0.0047	0	58.91	0.024	R	TLLEGEESR	M			Cmpd 178, AutoMSn(517.2640), 14.8 min
8	gi|375314779	keratin 1 [Homo sapiens]	314	66026	44	12	12	6	22.7	8.15	2432	1	0	0	517.265	1032.52	2	1032.51	0.0077	0	33.81	7.8	R	TLLEGEESR	M			Cmpd 157, AutoMSn(517.2655), 14.9 min
8	gi|375314779	keratin 1 [Homo sapiens]	314	66026	44	12	12	6	22.7	8.15	2433	1	0	0	517.266	1032.52	2	1032.51	0.008	0	21.02	150	R	TLLEGEESR	M			Cmpd 80, AutoMSn(517.2656), 14.8 min
8	gi|375314779	keratin 1 [Homo sapiens]	314	66026	44	12	12	6	22.7	8.15	2612	1	0	0	533.268	1064.52	2	1064.51	0.0074	0	27.36	31	K	AQYEDIAQK	S			Cmpd 140, AutoMSn(533.2679), 13.9 min
8	gi|375314779	keratin 1 [Homo sapiens]	314	66026	44	12	12	6	22.7	8.15	2613	1	0	0	533.268	1064.52	2	1064.51	0.0075	0	29.82	17	K	AQYEDIAQK	S			Cmpd 109, AutoMSn(533.2679), 13.8 min
8	gi|375314779	keratin 1 [Homo sapiens]	314	66026	44	12	12	6	22.7	8.15	2614	1	0	0	533.269	1064.52	2	1064.51	0.0085	0	25.16	51	K	AQYEDIAQK	S			Cmpd 113, AutoMSn(533.2684), 13.9 min
8	gi|375314779	keratin 1 [Homo sapiens]	314	66026	44	12	12	6	22.7	8.15	2615	4	0	0	533.269	1064.52	2	1064.51	0.0102	0	12.78	870	K	AQYEDIAQK	S			Cmpd 55, AutoMSn(533.2693), 13.9 min
8	gi|375314779	keratin 1 [Homo sapiens]	314	66026	44	12	12	6	22.7	8.15	3087	1	0	0	590.305	1178.59	2	1178.59	0.0016	0	21.63	110	K	YEELQITAGR	H			Cmpd 273, AutoMSn(590.3046), 17.5 min
8	gi|375314779	keratin 1 [Homo sapiens]	314	66026	44	12	12	6	22.7	8.15	3089	1	0	0	590.307	1178.6	2	1178.59	0.0061	0	51.09	0.13	K	YEELQITAGR	H			Cmpd 302, AutoMSn(590.3069), 17.6 min
8	gi|375314779	keratin 1 [Homo sapiens]	314	66026	44	12	12	6	22.7	8.15	3709	1	1	0	665.368	1328.72	2	1328.72	0.0021	0	46.62	0.36	R	NLDLDSIIAEVK	A			Cmpd 652, AutoMSn(665.3677), 25.9 min
8	gi|375314779	keratin 1 [Homo sapiens]	314	66026	44	12	12	6	22.7	8.15	3710	1	1	0	665.37	1328.73	2	1328.72	0.0068	0	46.17	0.4	R	NLDLDSIIAEVK	A			Cmpd 656, AutoMSn(665.3700), 26.0 min
8	gi|375314779	keratin 1 [Homo sapiens]	314	66026	44	12	12	6	22.7	8.15	4095	1	0	0	465.254	1392.74	3	1392.72	0.0159	1	78.52	0.00022	R	TNAENEFVTIKK	D			Cmpd 198, AutoMSn(465.2542), 15.2 min
8	gi|375314779	keratin 1 [Homo sapiens]	314	66026	44	12	12	6	22.7	8.15	4096	3	0	0	465.255	1392.74	3	1392.72	0.0176	1	18.04	240	R	TNAENEFVTIKK	D			Cmpd 95, AutoMSn(465.2548), 15.2 min
8	gi|375314779	keratin 1 [Homo sapiens]	314	66026	44	12	12	6	22.7	8.15	4097	1	0	0	465.255	1392.74	3	1392.72	0.018	1	33.84	6.4	R	TNAENEFVTIKK	D			Cmpd 168, AutoMSn(465.2549), 15.2 min
8	gi|375314779	keratin 1 [Homo sapiens]	314	66026	44	12	12	6	22.7	8.15	4098	1	0	0	465.256	1392.75	3	1392.72	0.0217	1	30.37	14	R	TNAENEFVTIKK	D			Cmpd 201, AutoMSn(465.2561), 15.3 min
8	gi|375314779	keratin 1 [Homo sapiens]	314	66026	44	12	12	6	22.7	8.15	4274	2	0	0	738.374	1474.73	2	1474.74	-0.0076	0	19.35	170	K	WELLQQVDTSTR	T			Cmpd 297, AutoMSn(738.3743), 21.6 min
8	gi|375314779	keratin 1 [Homo sapiens]	314	66026	44	12	12	6	22.7	8.15	4276	1	0	0	738.378	1474.74	2	1474.74	0.0004	0	57.41	0.027	K	WELLQQVDTSTR	T			Cmpd 450, AutoMSn(738.3783), 21.6 min
8	gi|375314779	keratin 1 [Homo sapiens]	314	66026	44	12	12	6	22.7	8.15	4277	1	0	0	738.381	1474.75	2	1474.74	0.0063	0	53.21	0.072	K	WELLQQVDTSTR	T			Cmpd 484, AutoMSn(738.3812), 21.7 min
8	gi|375314779	keratin 1 [Homo sapiens]	314	66026	44	12	12	6	22.7	8.15	4279	1	0	0	738.383	1474.75	2	1474.74	0.0088	0	58.7	0.02	K	WELLQQVDTSTR	T			Cmpd 447, AutoMSn(738.3825), 21.5 min
8	gi|375314779	keratin 1 [Homo sapiens]	314	66026	44	12	12	6	22.7	8.15	4280	1	0	0	738.384	1474.75	2	1474.74	0.0119	0	65.08	0.0047	K	WELLQQVDTSTR	T			Cmpd 481, AutoMSn(738.3840), 21.6 min
8	gi|375314779	keratin 1 [Homo sapiens]	314	66026	44	12	12	6	22.7	8.15	4281	1	0	0	738.384	1474.75	2	1474.74	0.0123	0	32.24	9	K	WELLQQVDTSTR	T			Cmpd 478, AutoMSn(738.3842), 21.5 min
8	gi|375314779	keratin 1 [Homo sapiens]	314	66026	44	12	12	6	22.7	8.15	4283	1	0	0	738.398	1474.78	2	1474.78	0.0035	0	70.68	0.0013	R	FLEQQNQVLQTK	W			Cmpd 272, AutoMSn(738.3980), 17.5 min
8	gi|375314779	keratin 1 [Homo sapiens]	314	66026	44	12	12	6	22.7	8.15	4285	1	0	0	738.401	1474.79	2	1474.78	0.009	0	50.71	0.13	R	FLEQQNQVLQTK	W			Cmpd 275, AutoMSn(738.4008), 17.6 min
8	gi|375314779	keratin 1 [Homo sapiens]	314	66026	44	12	12	6	22.7	8.15	4286	1	0	0	738.401	1474.79	2	1474.78	0.0091	0	83.5	6.8e-05	R	FLEQQNQVLQTK	W			Cmpd 301, AutoMSn(738.4008), 17.6 min
8	gi|375314779	keratin 1 [Homo sapiens]	314	66026	44	12	12	6	22.7	8.15	4287	6	0	0	738.401	1474.79	2	1474.78	0.0093	0	16.59	340	R	FLEQQNQVLQTK	W			Cmpd 186, AutoMSn(738.4009), 17.5 min
8	gi|375314779	keratin 1 [Homo sapiens]	314	66026	44	12	12	6	22.7	8.15	4683	1	0	0	546.733	1637.18	3	1637.85	-0.6765	1	49.78	0.29	K	SLNNQFASFIDKVR	F			Cmpd 471, AutoMSn(546.7326), 21.4 min
8	gi|375314779	keratin 1 [Homo sapiens]	314	66026	44	12	12	6	22.7	8.15	4686	1	0	0	546.96	1637.86	3	1637.85	0.0056	1	39.25	1.7	K	SLNNQFASFIDKVR	F			Cmpd 472, AutoMSn(546.9600), 21.4 min
8	gi|375314779	keratin 1 [Homo sapiens]	314	66026	44	12	12	6	22.7	8.15	4687	2	0	0	546.961	1637.86	3	1637.85	0.0075	1	30.29	13	K	SLNNQFASFIDKVR	F			Cmpd 350, AutoMSn(546.9606), 21.4 min
8	gi|375314779	keratin 1 [Homo sapiens]	314	66026	44	12	12	6	22.7	8.15	4688	1	0	0	546.963	1637.87	3	1637.85	0.0152	1	82.08	8.8e-05	K	SLNNQFASFIDKVR	F			Cmpd 439, AutoMSn(546.9632), 21.3 min
8	gi|375314779	keratin 1 [Homo sapiens]	314	66026	44	12	12	6	22.7	8.15	4689	1	0	0	546.964	1637.87	3	1637.85	0.0185	1	36.51	3.2	K	SLNNQFASFIDKVR	F			Cmpd 477, AutoMSn(546.9643), 21.5 min
8	gi|375314779	keratin 1 [Homo sapiens]	314	66026	44	12	12	6	22.7	8.15	4693	1	0	0	546.966	1637.88	3	1637.85	0.0251	1	33.75	6	K	SLNNQFASFIDKVR	F			Cmpd 285, AutoMSn(546.9665), 21.3 min
8	gi|375314779	keratin 1 [Homo sapiens]	314	66026	44	12	12	6	22.7	8.15	4694	1	0	0	547.154	1638.44	3	1637.85	0.5866	1	57.91	0.043	K	SLNNQFASFIDKVR	F			Cmpd 442, AutoMSn(547.1536), 21.4 min
8	gi|375314779	keratin 1 [Homo sapiens]	314	66026	44	12	12	6	22.7	8.15	5653	1	0	0	665.335	1992.98	3	1992.97	0.0133	0	18.56	170	R	THNLEPYFESFINNLR	R			Cmpd 600, AutoMSn(665.3348), 24.5 min
8	gi|375314779	keratin 1 [Homo sapiens]	314	66026	44	12	12	6	22.7	8.15	5654	1	0	0	665.337	1992.99	3	1992.97	0.0185	0	70.69	0.001	R	THNLEPYFESFINNLR	R			Cmpd 596, AutoMSn(665.3366), 24.4 min
8	gi|375314779	keratin 1 [Homo sapiens]	314	66026	44	12	12	6	22.7	8.15	5655	1	0	0	665.348	1993.02	3	1992.97	0.0535	0	20.41	110	R	THNLEPYFESFINNLR	R			Cmpd 549, AutoMSn(665.3482), 24.4 min
8	gi|375314779	keratin 1 [Homo sapiens]	314	66026	44	12	12	6	22.7	8.15	6241	2	0	0	795.329	2382.96	3	2382.94	0.0203	0	29.49	18	R	GGGGGGYGSGGSSYGSGGGSYGSGGGGGGGR	G			Cmpd 104, AutoMSn(795.3289), 13.7 min
8	gi|375314779	keratin 1 [Homo sapiens]	314	66026	44	12	12	6	22.7	8.15	6244	5	0	0	795.331	2382.97	3	2382.94	0.0273	0	25.45	44	R	GGGGGGYGSGGSSYGSGGGSYGSGGGGGGGR	G			Cmpd 9, AutoMSn(795.3313), 13.7 min
8	gi|375314779	keratin 1 [Homo sapiens]	314	66026	44	12	12	6	22.7	8.15	6556	1	0	0	978.182	2931.52	3	2931.51	0.0153	1	32.94	5.1	R	FLEQQNQVLQTKWELLQQVDTSTR	T			Cmpd 557, AutoMSn(978.1820), 23.4 min	emPAI	0.55
9	gi|28317	unnamed protein product [Homo sapiens]	299	59492	23	5	7	3	13.8	5.17	1730	1	1	0	404.21	806.406	2	806.392	0.0136	0	35.76	4.9	R	LAADDFR	L			Cmpd 188, AutoMSn(404.2102), 15.6 min
9	gi|28317	unnamed protein product [Homo sapiens]	299	59492	23	5	7	3	13.8	5.17	2417	1	1	0	516.307	1030.6	2	1030.59	0.0077	0	34.97	5.9	R	VLDELTLTK	A			Cmpd 392, AutoMSn(516.3066), 19.6 min
9	gi|28317	unnamed protein product [Homo sapiens]	299	59492	23	5	7	3	13.8	5.17	2419	2	1	0	516.308	1030.6	2	1030.59	0.0096	0	28.31	27	R	VLDELTLTK	A			Cmpd 395, AutoMSn(516.3076), 19.6 min
9	gi|28317	unnamed protein product [Homo sapiens]	299	59492	23	5	7	3	13.8	5.17	2787	1	1	0	1109.48	1108.48	1	1108.48	-0.006	0	18.34	240	K	DAEAWFNEK	S			Cmpd 393, AutoMSn(1109.4838), 19.6 min
9	gi|28317	unnamed protein product [Homo sapiens]	299	59492	23	5	7	3	13.8	5.17	2788	1	1	0	1109.48	1108.48	1	1108.48	-0.0053	0	17.63	280	K	DAEAWFNEK	S			Cmpd 396, AutoMSn(1109.4845), 19.7 min
9	gi|28317	unnamed protein product [Homo sapiens]	299	59492	23	5	7	3	13.8	5.17	2789	1	1	0	555.252	1108.49	2	1108.48	0.0065	0	37.93	2.6	K	DAEAWFNEK	S			Cmpd 391, AutoMSn(555.2518), 19.6 min
9	gi|28317	unnamed protein product [Homo sapiens]	299	59492	23	5	7	3	13.8	5.17	2790	1	1	0	555.252	1108.49	2	1108.48	0.007	0	38.12	2.5	K	DAEAWFNEK	S			Cmpd 394, AutoMSn(555.2520), 19.6 min
9	gi|28317	unnamed protein product [Homo sapiens]	299	59492	23	5	7	3	13.8	5.17	2791	1	1	0	555.253	1108.49	2	1108.48	0.0079	0	44.99	0.51	K	DAEAWFNEK	S			Cmpd 389, AutoMSn(555.2525), 19.5 min
9	gi|28317	unnamed protein product [Homo sapiens]	299	59492	23	5	7	3	13.8	5.17	2792	1	1	0	555.254	1108.49	2	1108.48	0.0106	0	44.9	0.52	K	DAEAWFNEK	S			Cmpd 363, AutoMSn(555.2538), 19.6 min
9	gi|28317	unnamed protein product [Homo sapiens]	299	59492	23	5	7	3	13.8	5.17	2794	1	1	0	555.254	1108.49	2	1108.48	0.0108	0	33.65	6.9	K	DAEAWFNEK	S			Cmpd 361, AutoMSn(555.2539), 19.5 min
9	gi|28317	unnamed protein product [Homo sapiens]	299	59492	23	5	7	3	13.8	5.17	3396	4	1	1	631.806	1261.6	2	1261.59	0.007	0	15.87	430	R	SLLEGEGSSGGGGR	G			Cmpd 143, AutoMSn(631.8057), 14.6 min
9	gi|28317	unnamed protein product [Homo sapiens]	299	59492	23	5	7	3	13.8	5.17	4012	1	1	0	691.329	1380.64	2	1380.64	0.0027	0	25.13	48	R	ALEESNYELEGK	I			Cmpd 253, AutoMSn(691.3291), 16.5 min
9	gi|28317	unnamed protein product [Homo sapiens]	299	59492	23	5	7	3	13.8	5.17	4013	1	1	0	691.33	1380.65	2	1380.64	0.005	0	79.19	0.00019	R	ALEESNYELEGK	I			Cmpd 252, AutoMSn(691.3302), 16.4 min
9	gi|28317	unnamed protein product [Homo sapiens]	299	59492	23	5	7	3	13.8	5.17	4317	1	1	1	498.587	1492.74	3	1492.73	0.0133	1	41.35	1.1	R	SQYEQLAEQNRK	D			Cmpd 76, AutoMSn(498.5874), 13.1 min
9	gi|28317	unnamed protein product [Homo sapiens]	299	59492	23	5	7	3	13.8	5.17	4318	1	1	1	498.588	1492.74	3	1492.73	0.0158	1	71.67	0.00099	R	SQYEQLAEQNRK	D			Cmpd 106, AutoMSn(498.5882), 13.2 min
9	gi|28317	unnamed protein product [Homo sapiens]	299	59492	23	5	7	3	13.8	5.17	4893	3	1	1	854.391	1706.77	2	1706.76	0.0029	0	14.41	540	K	GSLGGGFSSGGFSGGSFSR	G			Cmpd 255, AutoMSn(854.3912), 20.0 min
9	gi|28317	unnamed protein product [Homo sapiens]	299	59492	23	5	7	3	13.8	5.17	4894	1	1	1	854.392	1706.77	2	1706.76	0.0052	0	20.2	140	K	GSLGGGFSSGGFSGGSFSR	G			Cmpd 385, AutoMSn(854.3923), 20.0 min
9	gi|28317	unnamed protein product [Homo sapiens]	299	59492	23	5	7	3	13.8	5.17	4895	1	1	1	854.393	1706.77	2	1706.76	0.006	0	97.8	2.5e-06	K	GSLGGGFSSGGFSGGSFSR	G			Cmpd 412, AutoMSn(854.3927), 20.0 min
9	gi|28317	unnamed protein product [Homo sapiens]	299	59492	23	5	7	3	13.8	5.17	4896	1	1	1	854.394	1706.77	2	1706.76	0.0095	0	32.23	8.9	K	GSLGGGFSSGGFSGGSFSR	G			Cmpd 377, AutoMSn(854.3945), 19.9 min
9	gi|28317	unnamed protein product [Homo sapiens]	299	59492	23	5	7	3	13.8	5.17	4897	1	1	1	854.395	1706.78	2	1706.76	0.0105	0	61.3	0.011	K	GSLGGGFSSGGFSGGSFSR	G			Cmpd 380, AutoMSn(854.3950), 20.0 min
9	gi|28317	unnamed protein product [Homo sapiens]	299	59492	23	5	7	3	13.8	5.17	4898	1	1	1	854.396	1706.78	2	1706.76	0.0117	0	131.59	1e-09	K	GSLGGGFSSGGFSGGSFSR	G			Cmpd 409, AutoMSn(854.3956), 20.0 min
9	gi|28317	unnamed protein product [Homo sapiens]	299	59492	23	5	7	3	13.8	5.17	4899	1	1	1	854.396	1706.78	2	1706.76	0.0128	0	27.4	27	K	GSLGGGFSSGGFSGGSFSR	G			Cmpd 104, AutoMSn(854.3962), 20.0 min
9	gi|28317	unnamed protein product [Homo sapiens]	299	59492	23	5	7	3	13.8	5.17	4900	2	1	1	854.398	1706.78	2	1706.76	0.0168	0	19.76	160	K	GSLGGGFSSGGFSGGSFSR	G			Cmpd 106, AutoMSn(854.3981), 20.0 min	emPAI	0.24
10	gi|472350744	PREDICTED: keratin, type I cytoskeletal 10 [Odobenus rosmarus divergens]	274	57291	20	4	5	2	9.9	5.17	1730	1	0	0	404.21	806.406	2	806.392	0.0136	0	35.76	4.9	R	LAADDFR	L			Cmpd 188, AutoMSn(404.2102), 15.6 min
10	gi|472350744	PREDICTED: keratin, type I cytoskeletal 10 [Odobenus rosmarus divergens]	274	57291	20	4	5	2	9.9	5.17	2417	1	0	0	516.307	1030.6	2	1030.59	0.0077	0	34.97	5.9	R	VLDELTLTK	A			Cmpd 392, AutoMSn(516.3066), 19.6 min
10	gi|472350744	PREDICTED: keratin, type I cytoskeletal 10 [Odobenus rosmarus divergens]	274	57291	20	4	5	2	9.9	5.17	2419	2	0	0	516.308	1030.6	2	1030.59	0.0096	0	28.31	27	R	VLDELTLTK	A			Cmpd 395, AutoMSn(516.3076), 19.6 min
10	gi|472350744	PREDICTED: keratin, type I cytoskeletal 10 [Odobenus rosmarus divergens]	274	57291	20	4	5	2	9.9	5.17	2787	1	0	0	1109.48	1108.48	1	1108.48	-0.006	0	18.34	240	K	DAEAWFNEK	S			Cmpd 393, AutoMSn(1109.4838), 19.6 min
10	gi|472350744	PREDICTED: keratin, type I cytoskeletal 10 [Odobenus rosmarus divergens]	274	57291	20	4	5	2	9.9	5.17	2788	1	0	0	1109.48	1108.48	1	1108.48	-0.0053	0	17.63	280	K	DAEAWFNEK	S			Cmpd 396, AutoMSn(1109.4845), 19.7 min
10	gi|472350744	PREDICTED: keratin, type I cytoskeletal 10 [Odobenus rosmarus divergens]	274	57291	20	4	5	2	9.9	5.17	2789	1	0	0	555.252	1108.49	2	1108.48	0.0065	0	37.93	2.6	K	DAEAWFNEK	S			Cmpd 391, AutoMSn(555.2518), 19.6 min
10	gi|472350744	PREDICTED: keratin, type I cytoskeletal 10 [Odobenus rosmarus divergens]	274	57291	20	4	5	2	9.9	5.17	2790	1	0	0	555.252	1108.49	2	1108.48	0.007	0	38.12	2.5	K	DAEAWFNEK	S			Cmpd 394, AutoMSn(555.2520), 19.6 min
10	gi|472350744	PREDICTED: keratin, type I cytoskeletal 10 [Odobenus rosmarus divergens]	274	57291	20	4	5	2	9.9	5.17	2791	1	0	0	555.253	1108.49	2	1108.48	0.0079	0	44.99	0.51	K	DAEAWFNEK	S			Cmpd 389, AutoMSn(555.2525), 19.5 min
10	gi|472350744	PREDICTED: keratin, type I cytoskeletal 10 [Odobenus rosmarus divergens]	274	57291	20	4	5	2	9.9	5.17	2792	1	0	0	555.254	1108.49	2	1108.48	0.0106	0	44.9	0.52	K	DAEAWFNEK	S			Cmpd 363, AutoMSn(555.2538), 19.6 min
10	gi|472350744	PREDICTED: keratin, type I cytoskeletal 10 [Odobenus rosmarus divergens]	274	57291	20	4	5	2	9.9	5.17	2794	1	0	0	555.254	1108.49	2	1108.48	0.0108	0	33.65	6.9	K	DAEAWFNEK	S			Cmpd 361, AutoMSn(555.2539), 19.5 min
10	gi|472350744	PREDICTED: keratin, type I cytoskeletal 10 [Odobenus rosmarus divergens]	274	57291	20	4	5	2	9.9	5.17	4012	1	0	0	691.329	1380.64	2	1380.64	0.0027	0	25.13	48	R	ALEESNYELEGK	I			Cmpd 253, AutoMSn(691.3291), 16.5 min
10	gi|472350744	PREDICTED: keratin, type I cytoskeletal 10 [Odobenus rosmarus divergens]	274	57291	20	4	5	2	9.9	5.17	4013	1	0	0	691.33	1380.65	2	1380.64	0.005	0	79.19	0.00019	R	ALEESNYELEGK	I			Cmpd 252, AutoMSn(691.3302), 16.4 min
10	gi|472350744	PREDICTED: keratin, type I cytoskeletal 10 [Odobenus rosmarus divergens]	274	57291	20	4	5	2	9.9	5.17	4893	3	0	1	854.391	1706.77	2	1706.76	0.0029	0	14.41	540	K	GSIGGGFSSGGFSGGSFSR	G			Cmpd 255, AutoMSn(854.3912), 20.0 min
10	gi|472350744	PREDICTED: keratin, type I cytoskeletal 10 [Odobenus rosmarus divergens]	274	57291	20	4	5	2	9.9	5.17	4894	1	0	1	854.392	1706.77	2	1706.76	0.0052	0	20.2	140	K	GSIGGGFSSGGFSGGSFSR	G			Cmpd 385, AutoMSn(854.3923), 20.0 min
10	gi|472350744	PREDICTED: keratin, type I cytoskeletal 10 [Odobenus rosmarus divergens]	274	57291	20	4	5	2	9.9	5.17	4895	1	0	1	854.393	1706.77	2	1706.76	0.006	0	97.8	2.5e-06	K	GSIGGGFSSGGFSGGSFSR	G			Cmpd 412, AutoMSn(854.3927), 20.0 min
10	gi|472350744	PREDICTED: keratin, type I cytoskeletal 10 [Odobenus rosmarus divergens]	274	57291	20	4	5	2	9.9	5.17	4896	1	0	1	854.394	1706.77	2	1706.76	0.0095	0	32.23	8.9	K	GSIGGGFSSGGFSGGSFSR	G			Cmpd 377, AutoMSn(854.3945), 19.9 min
10	gi|472350744	PREDICTED: keratin, type I cytoskeletal 10 [Odobenus rosmarus divergens]	274	57291	20	4	5	2	9.9	5.17	4897	1	0	1	854.395	1706.78	2	1706.76	0.0105	0	61.3	0.011	K	GSIGGGFSSGGFSGGSFSR	G			Cmpd 380, AutoMSn(854.3950), 20.0 min
10	gi|472350744	PREDICTED: keratin, type I cytoskeletal 10 [Odobenus rosmarus divergens]	274	57291	20	4	5	2	9.9	5.17	4898	1	0	1	854.396	1706.78	2	1706.76	0.0117	0	131.59	1e-09	K	GSIGGGFSSGGFSGGSFSR	G			Cmpd 409, AutoMSn(854.3956), 20.0 min
10	gi|472350744	PREDICTED: keratin, type I cytoskeletal 10 [Odobenus rosmarus divergens]	274	57291	20	4	5	2	9.9	5.17	4899	1	0	1	854.396	1706.78	2	1706.76	0.0128	0	27.4	27	K	GSIGGGFSSGGFSGGSFSR	G			Cmpd 104, AutoMSn(854.3962), 20.0 min
10	gi|472350744	PREDICTED: keratin, type I cytoskeletal 10 [Odobenus rosmarus divergens]	274	57291	20	4	5	2	9.9	5.17	4900	2	0	1	854.398	1706.78	2	1706.76	0.0168	0	19.76	160	K	GSIGGGFSSGGFSGGSFSR	G			Cmpd 106, AutoMSn(854.3981), 20.0 min	emPAI	0.18
11	gi|507554877	PREDICTED: anionic trypsin-2-like [Jaculus jaculus]	272	26064	26	13	1	1	4.1	4.91	2479	1	0	1	523.283	1044.55	2	1044.56	-0.0042	0	64.52	0.0064	K	LSSPATINSR	V			Cmpd 105, AutoMSn(523.2834), 14.6 min
11	gi|507554877	PREDICTED: anionic trypsin-2-like [Jaculus jaculus]	272	26064	26	13	1	1	4.1	4.91	2481	1	0	1	523.287	1044.56	2	1044.56	0.0026	0	77.95	0.00029	K	LSSPATINSR	V			Cmpd 160, AutoMSn(523.2867), 14.7 min
11	gi|507554877	PREDICTED: anionic trypsin-2-like [Jaculus jaculus]	272	26064	26	13	1	1	4.1	4.91	2482	1	0	1	523.287	1044.56	2	1044.56	0.0033	0	64.47	0.0064	K	LSSPATINSR	V			Cmpd 218, AutoMSn(523.2871), 14.7 min
11	gi|507554877	PREDICTED: anionic trypsin-2-like [Jaculus jaculus]	272	26064	26	13	1	1	4.1	4.91	2483	1	0	1	523.287	1044.56	2	1044.56	0.0038	0	33.83	7.5	K	LSSPATINSR	V			Cmpd 225, AutoMSn(523.2873), 14.8 min
11	gi|507554877	PREDICTED: anionic trypsin-2-like [Jaculus jaculus]	272	26064	26	13	1	1	4.1	4.91	2484	1	0	1	523.288	1044.56	2	1044.56	0.004	0	72.32	0.0011	K	LSSPATINSR	V			Cmpd 14, AutoMSn(523.2874), 14.6 min
11	gi|507554877	PREDICTED: anionic trypsin-2-like [Jaculus jaculus]	272	26064	26	13	1	1	4.1	4.91	2485	1	0	1	523.288	1044.56	2	1044.56	0.0042	0	50.26	0.17	K	LSSPATINSR	V			Cmpd 175, AutoMSn(523.2875), 14.7 min
11	gi|507554877	PREDICTED: anionic trypsin-2-like [Jaculus jaculus]	272	26064	26	13	1	1	4.1	4.91	2486	1	0	1	523.288	1044.56	2	1044.56	0.0043	0	64.89	0.0058	K	LSSPATINSR	V			Cmpd 164, AutoMSn(523.2876), 14.7 min
11	gi|507554877	PREDICTED: anionic trypsin-2-like [Jaculus jaculus]	272	26064	26	13	1	1	4.1	4.91	2487	1	0	1	523.288	1044.56	2	1044.56	0.0044	0	60.66	0.015	K	LSSPATINSR	V			Cmpd 179, AutoMSn(523.2877), 14.8 min
11	gi|507554877	PREDICTED: anionic trypsin-2-like [Jaculus jaculus]	272	26064	26	13	1	1	4.1	4.91	2488	1	0	1	523.288	1044.56	2	1044.56	0.0045	0	72.42	0.001	K	LSSPATINSR	V			Cmpd 15, AutoMSn(523.2877), 14.7 min
11	gi|507554877	PREDICTED: anionic trypsin-2-like [Jaculus jaculus]	272	26064	26	13	1	1	4.1	4.91	2489	1	0	1	523.288	1044.56	2	1044.56	0.0051	0	78.22	0.00027	K	LSSPATINSR	V			Cmpd 177, AutoMSn(523.2880), 14.8 min
11	gi|507554877	PREDICTED: anionic trypsin-2-like [Jaculus jaculus]	272	26064	26	13	1	1	4.1	4.91	2490	1	0	1	523.288	1044.56	2	1044.56	0.0052	0	58.57	0.025	K	LSSPATINSR	V			Cmpd 16, AutoMSn(523.2880), 14.7 min
11	gi|507554877	PREDICTED: anionic trypsin-2-like [Jaculus jaculus]	272	26064	26	13	1	1	4.1	4.91	2491	1	0	1	523.288	1044.56	2	1044.56	0.0053	0	53.57	0.079	K	LSSPATINSR	V			Cmpd 75, AutoMSn(523.2881), 14.6 min
11	gi|507554877	PREDICTED: anionic trypsin-2-like [Jaculus jaculus]	272	26064	26	13	1	1	4.1	4.91	2492	1	0	1	523.288	1044.56	2	1044.56	0.0056	0	51.5	0.13	K	LSSPATINSR	V			Cmpd 74, AutoMSn(523.2882), 14.6 min
11	gi|507554877	PREDICTED: anionic trypsin-2-like [Jaculus jaculus]	272	26064	26	13	1	1	4.1	4.91	2493	1	0	1	523.288	1044.56	2	1044.56	0.0056	0	53.67	0.077	K	LSSPATINSR	V			Cmpd 220, AutoMSn(523.2883), 14.7 min
11	gi|507554877	PREDICTED: anionic trypsin-2-like [Jaculus jaculus]	272	26064	26	13	1	1	4.1	4.91	2494	1	0	1	523.288	1044.56	2	1044.56	0.0056	0	64.58	0.0063	K	LSSPATINSR	V			Cmpd 170, AutoMSn(523.2883), 14.8 min
11	gi|507554877	PREDICTED: anionic trypsin-2-like [Jaculus jaculus]	272	26064	26	13	1	1	4.1	4.91	2495	1	0	1	523.288	1044.56	2	1044.56	0.0059	0	45.42	0.52	K	LSSPATINSR	V			Cmpd 107, AutoMSn(523.2884), 14.6 min
11	gi|507554877	PREDICTED: anionic trypsin-2-like [Jaculus jaculus]	272	26064	26	13	1	1	4.1	4.91	2496	1	0	1	523.288	1044.56	2	1044.56	0.0062	0	37.39	3.3	K	LSSPATINSR	V			Cmpd 142, AutoMSn(523.2885), 14.6 min
11	gi|507554877	PREDICTED: anionic trypsin-2-like [Jaculus jaculus]	272	26064	26	13	1	1	4.1	4.91	2497	1	0	1	523.289	1044.56	2	1044.56	0.0066	0	64.5	0.0064	K	LSSPATINSR	V			Cmpd 163, AutoMSn(523.2888), 14.7 min
11	gi|507554877	PREDICTED: anionic trypsin-2-like [Jaculus jaculus]	272	26064	26	13	1	1	4.1	4.91	2498	1	0	1	523.289	1044.56	2	1044.56	0.0066	0	51.68	0.12	K	LSSPATINSR	V			Cmpd 13, AutoMSn(523.2888), 14.6 min
11	gi|507554877	PREDICTED: anionic trypsin-2-like [Jaculus jaculus]	272	26064	26	13	1	1	4.1	4.91	2499	1	0	1	523.289	1044.56	2	1044.56	0.0075	0	78.63	0.00025	K	LSSPATINSR	V			Cmpd 144, AutoMSn(523.2892), 14.6 min
11	gi|507554877	PREDICTED: anionic trypsin-2-like [Jaculus jaculus]	272	26064	26	13	1	1	4.1	4.91	2500	1	0	1	523.289	1044.56	2	1044.56	0.0076	0	53.37	0.083	K	LSSPATINSR	V			Cmpd 174, AutoMSn(523.2893), 14.7 min
11	gi|507554877	PREDICTED: anionic trypsin-2-like [Jaculus jaculus]	272	26064	26	13	1	1	4.1	4.91	2501	1	0	1	523.289	1044.56	2	1044.56	0.0078	0	44.98	0.57	K	LSSPATINSR	V			Cmpd 204, AutoMSn(523.2894), 14.8 min
11	gi|507554877	PREDICTED: anionic trypsin-2-like [Jaculus jaculus]	272	26064	26	13	1	1	4.1	4.91	2502	1	0	1	523.289	1044.56	2	1044.56	0.0079	0	40.43	1.6	K	LSSPATINSR	V			Cmpd 12, AutoMSn(523.2894), 14.6 min
11	gi|507554877	PREDICTED: anionic trypsin-2-like [Jaculus jaculus]	272	26064	26	13	1	1	4.1	4.91	2503	1	0	1	523.29	1044.56	2	1044.56	0.0083	0	64.54	0.0063	K	LSSPATINSR	V			Cmpd 174, AutoMSn(523.2896), 14.7 min
11	gi|507554877	PREDICTED: anionic trypsin-2-like [Jaculus jaculus]	272	26064	26	13	1	1	4.1	4.91	2504	1	0	1	523.29	1044.56	2	1044.56	0.0085	0	51.11	0.14	K	LSSPATINSR	V			Cmpd 167, AutoMSn(523.2897), 14.7 min
11	gi|507554877	PREDICTED: anionic trypsin-2-like [Jaculus jaculus]	272	26064	26	13	1	1	4.1	4.91	2505	1	0	1	523.29	1044.57	2	1044.56	0.0091	0	52.82	0.094	K	LSSPATINSR	V			Cmpd 147, AutoMSn(523.2900), 14.7 min	emPAI	0.13
12	gi|676264984	Keratin, type II cytoskeletal 1 [Fukomys damarensis]	259	158304	30	12	6	5	4.7	5.32	2426	1	0	0	517.262	1032.51	2	1032.51	0	0	40.19	1.8	R	TLLEGEESR	M			Cmpd 115, AutoMSn(517.2616), 14.8 min
12	gi|676264984	Keratin, type II cytoskeletal 1 [Fukomys damarensis]	259	158304	30	12	6	5	4.7	5.32	2427	1	0	0	517.263	1032.51	2	1032.51	0.0031	0	30.45	17	R	TLLEGEESR	M			Cmpd 18, AutoMSn(517.2632), 14.8 min
12	gi|676264984	Keratin, type II cytoskeletal 1 [Fukomys damarensis]	259	158304	30	12	6	5	4.7	5.32	2428	1	0	0	517.263	1032.51	2	1032.51	0.0032	0	59.02	0.024	R	TLLEGEESR	M			Cmpd 181, AutoMSn(517.2632), 14.9 min
12	gi|676264984	Keratin, type II cytoskeletal 1 [Fukomys damarensis]	259	158304	30	12	6	5	4.7	5.32	2429	1	0	0	517.263	1032.51	2	1032.51	0.0034	0	55.38	0.055	R	TLLEGEESR	M			Cmpd 150, AutoMSn(517.2633), 14.8 min
12	gi|676264984	Keratin, type II cytoskeletal 1 [Fukomys damarensis]	259	158304	30	12	6	5	4.7	5.32	2430	1	0	0	517.264	1032.51	2	1032.51	0.0047	0	58.91	0.024	R	TLLEGEESR	M			Cmpd 178, AutoMSn(517.2640), 14.8 min
12	gi|676264984	Keratin, type II cytoskeletal 1 [Fukomys damarensis]	259	158304	30	12	6	5	4.7	5.32	2432	1	0	0	517.265	1032.52	2	1032.51	0.0077	0	33.81	7.8	R	TLLEGEESR	M			Cmpd 157, AutoMSn(517.2655), 14.9 min
12	gi|676264984	Keratin, type II cytoskeletal 1 [Fukomys damarensis]	259	158304	30	12	6	5	4.7	5.32	2433	1	0	0	517.266	1032.52	2	1032.51	0.008	0	21.02	150	R	TLLEGEESR	M			Cmpd 80, AutoMSn(517.2656), 14.8 min
12	gi|676264984	Keratin, type II cytoskeletal 1 [Fukomys damarensis]	259	158304	30	12	6	5	4.7	5.32	3517	1	0	0	651.862	1301.71	2	1301.71	0.0016	0	51.26	0.12	R	SLDLDSIIAEVK	A			Cmpd 597, AutoMSn(651.8620), 26.0 min
12	gi|676264984	Keratin, type II cytoskeletal 1 [Fukomys damarensis]	259	158304	30	12	6	5	4.7	5.32	3520	1	0	0	651.864	1301.71	2	1301.71	0.0046	0	55.33	0.047	R	SLDLDSIIAEVK	A			Cmpd 416, AutoMSn(651.8635), 25.9 min
12	gi|676264984	Keratin, type II cytoskeletal 1 [Fukomys damarensis]	259	158304	30	12	6	5	4.7	5.32	3522	1	0	0	651.864	1301.71	2	1301.71	0.0057	0	68.08	0.0025	R	SLDLDSIIAEVK	A			Cmpd 654, AutoMSn(651.8640), 26.0 min
12	gi|676264984	Keratin, type II cytoskeletal 1 [Fukomys damarensis]	259	158304	30	12	6	5	4.7	5.32	3523	1	0	0	651.864	1301.71	2	1301.71	0.0059	0	33	8	R	SLDLDSIIAEVK	A			Cmpd 594, AutoMSn(651.8641), 25.9 min
12	gi|676264984	Keratin, type II cytoskeletal 1 [Fukomys damarensis]	259	158304	30	12	6	5	4.7	5.32	3525	1	0	0	651.865	1301.71	2	1301.71	0.0068	0	73.31	0.00074	R	SLDLDSIIAEVK	A			Cmpd 651, AutoMSn(651.8646), 25.9 min
12	gi|676264984	Keratin, type II cytoskeletal 1 [Fukomys damarensis]	259	158304	30	12	6	5	4.7	5.32	3528	1	0	0	651.866	1301.72	2	1301.71	0.0092	0	21.91	100	R	SLDLDSIIAEVK	A			Cmpd 658, AutoMSn(651.8658), 25.9 min
12	gi|676264984	Keratin, type II cytoskeletal 1 [Fukomys damarensis]	259	158304	30	12	6	5	4.7	5.32	3529	1	0	0	651.866	1301.72	2	1301.71	0.0095	0	38.59	2.2	R	SLDLDSIIAEVK	A			Cmpd 591, AutoMSn(651.8659), 25.8 min
12	gi|676264984	Keratin, type II cytoskeletal 1 [Fukomys damarensis]	259	158304	30	12	6	5	4.7	5.32	3531	4	0	0	651.868	1301.72	2	1301.71	0.0137	0	23.39	73	R	SLDLDSIIAEVK	A			Cmpd 648, AutoMSn(651.8680), 25.8 min
12	gi|676264984	Keratin, type II cytoskeletal 1 [Fukomys damarensis]	259	158304	30	12	6	5	4.7	5.32	4095	1	0	0	465.254	1392.74	3	1392.72	0.0159	1	78.52	0.00022	R	TNAENEFVTIKK	D			Cmpd 198, AutoMSn(465.2542), 15.2 min
12	gi|676264984	Keratin, type II cytoskeletal 1 [Fukomys damarensis]	259	158304	30	12	6	5	4.7	5.32	4096	3	0	0	465.255	1392.74	3	1392.72	0.0176	1	18.04	240	R	TNAENEFVTIKK	D			Cmpd 95, AutoMSn(465.2548), 15.2 min
12	gi|676264984	Keratin, type II cytoskeletal 1 [Fukomys damarensis]	259	158304	30	12	6	5	4.7	5.32	4097	1	0	0	465.255	1392.74	3	1392.72	0.018	1	33.84	6.4	R	TNAENEFVTIKK	D			Cmpd 168, AutoMSn(465.2549), 15.2 min
12	gi|676264984	Keratin, type II cytoskeletal 1 [Fukomys damarensis]	259	158304	30	12	6	5	4.7	5.32	4098	1	0	0	465.256	1392.75	3	1392.72	0.0217	1	30.37	14	R	TNAENEFVTIKK	D			Cmpd 201, AutoMSn(465.2561), 15.3 min
12	gi|676264984	Keratin, type II cytoskeletal 1 [Fukomys damarensis]	259	158304	30	12	6	5	4.7	5.32	4274	2	0	0	738.374	1474.73	2	1474.74	-0.0076	0	19.35	170	K	WELLQQVDTSTR	S			Cmpd 297, AutoMSn(738.3743), 21.6 min
12	gi|676264984	Keratin, type II cytoskeletal 1 [Fukomys damarensis]	259	158304	30	12	6	5	4.7	5.32	4276	1	0	0	738.378	1474.74	2	1474.74	0.0004	0	57.41	0.027	K	WELLQQVDTSTR	S			Cmpd 450, AutoMSn(738.3783), 21.6 min
12	gi|676264984	Keratin, type II cytoskeletal 1 [Fukomys damarensis]	259	158304	30	12	6	5	4.7	5.32	4277	1	0	0	738.381	1474.75	2	1474.74	0.0063	0	53.21	0.072	K	WELLQQVDTSTR	S			Cmpd 484, AutoMSn(738.3812), 21.7 min
12	gi|676264984	Keratin, type II cytoskeletal 1 [Fukomys damarensis]	259	158304	30	12	6	5	4.7	5.32	4279	1	0	0	738.383	1474.75	2	1474.74	0.0088	0	58.7	0.02	K	WELLQQVDTSTR	S			Cmpd 447, AutoMSn(738.3825), 21.5 min
12	gi|676264984	Keratin, type II cytoskeletal 1 [Fukomys damarensis]	259	158304	30	12	6	5	4.7	5.32	4280	1	0	0	738.384	1474.75	2	1474.74	0.0119	0	65.08	0.0047	K	WELLQQVDTSTR	S			Cmpd 481, AutoMSn(738.3840), 21.6 min
12	gi|676264984	Keratin, type II cytoskeletal 1 [Fukomys damarensis]	259	158304	30	12	6	5	4.7	5.32	4281	1	0	0	738.384	1474.75	2	1474.74	0.0123	0	32.24	9	K	WELLQQVDTSTR	S			Cmpd 478, AutoMSn(738.3842), 21.5 min
12	gi|676264984	Keratin, type II cytoskeletal 1 [Fukomys damarensis]	259	158304	30	12	6	5	4.7	5.32	4283	1	0	0	738.398	1474.78	2	1474.81	-0.0328	1	70.68	0.0013	R	FLEQQNQVLKTK	W			Cmpd 272, AutoMSn(738.3980), 17.5 min
12	gi|676264984	Keratin, type II cytoskeletal 1 [Fukomys damarensis]	259	158304	30	12	6	5	4.7	5.32	4285	1	0	0	738.401	1474.79	2	1474.81	-0.0273	1	50.71	0.13	R	FLEQQNQVLKTK	W			Cmpd 275, AutoMSn(738.4008), 17.6 min
12	gi|676264984	Keratin, type II cytoskeletal 1 [Fukomys damarensis]	259	158304	30	12	6	5	4.7	5.32	4286	1	0	0	738.401	1474.79	2	1474.81	-0.0273	1	83.5	6.8e-05	R	FLEQQNQVLKTK	W			Cmpd 301, AutoMSn(738.4008), 17.6 min
12	gi|676264984	Keratin, type II cytoskeletal 1 [Fukomys damarensis]	259	158304	30	12	6	5	4.7	5.32	4287	6	0	0	738.401	1474.79	2	1474.81	-0.027	1	16.59	340	R	FLEQQNQVLKTK	W			Cmpd 186, AutoMSn(738.4009), 17.5 min
12	gi|676264984	Keratin, type II cytoskeletal 1 [Fukomys damarensis]	259	158304	30	12	6	5	4.7	5.32	6556	1	0	0	978.182	2931.52	3	2931.51	0.0153	1	32.94	5.1	R	FLEQQNQVLQTKWELLQQVDTSTR	S			Cmpd 557, AutoMSn(978.1820), 23.4 min	emPAI	0.11
13	gi|431921648	Keratin, type II cytoskeletal 1 [Pteropus alecto]	249	138067	23	6	8	4	7.1	4.89	1854	1	1	0	416.252	830.489	2	830.486	0.0025	0	30.27	20	R	SLVGLGGTK	S			Cmpd 239, AutoMSn(416.2516), 16.2 min
13	gi|431921648	Keratin, type II cytoskeletal 1 [Pteropus alecto]	249	138067	23	6	8	4	7.1	4.89	2017	1	0	0	437.754	873.494	2	873.492	0.002	0	39.78	2.2	R	SLVNLGGSK	S			Cmpd 214, AutoMSn(437.7543), 16.2 min
13	gi|431921648	Keratin, type II cytoskeletal 1 [Pteropus alecto]	249	138067	23	6	8	4	7.1	4.89	2018	1	0	0	437.754	873.494	2	873.492	0.0022	0	34.71	7.1	R	SLVNLGGSK	S			Cmpd 242, AutoMSn(437.7544), 16.2 min
13	gi|431921648	Keratin, type II cytoskeletal 1 [Pteropus alecto]	249	138067	23	6	8	4	7.1	4.89	2785	1	1	0	554.276	1106.54	2	1106.54	0.0022	0	27.05	35	K	AQYEEIAQR	S			Cmpd 131, AutoMSn(554.2762), 14.3 min
13	gi|431921648	Keratin, type II cytoskeletal 1 [Pteropus alecto]	249	138067	23	6	8	4	7.1	4.89	2786	1	1	0	554.277	1106.54	2	1106.54	0.0038	0	41.08	1.4	K	AQYEEIAQR	S			Cmpd 157, AutoMSn(554.2770), 14.3 min
13	gi|431921648	Keratin, type II cytoskeletal 1 [Pteropus alecto]	249	138067	23	6	8	4	7.1	4.89	3373	1	1	0	627.81	1253.61	2	1253.6	0.0058	0	84.05	5.9e-05	R	GFSSGSAVVSGGSR	R			Cmpd 180, AutoMSn(627.8102), 14.8 min
13	gi|431921648	Keratin, type II cytoskeletal 1 [Pteropus alecto]	249	138067	23	6	8	4	7.1	4.89	3709	1	0	0	665.368	1328.72	2	1328.72	0.0021	0	46.62	0.36	R	NLDLDSIIAEVK	A			Cmpd 652, AutoMSn(665.3677), 25.9 min
13	gi|431921648	Keratin, type II cytoskeletal 1 [Pteropus alecto]	249	138067	23	6	8	4	7.1	4.89	3710	1	0	0	665.37	1328.73	2	1328.72	0.0068	0	46.17	0.4	R	NLDLDSIIAEVK	A			Cmpd 656, AutoMSn(665.3700), 26.0 min
13	gi|431921648	Keratin, type II cytoskeletal 1 [Pteropus alecto]	249	138067	23	6	8	4	7.1	4.89	4095	1	0	0	465.254	1392.74	3	1392.72	0.0159	1	78.52	0.00022	R	TNAENEFVTIKK	E			Cmpd 198, AutoMSn(465.2542), 15.2 min
13	gi|431921648	Keratin, type II cytoskeletal 1 [Pteropus alecto]	249	138067	23	6	8	4	7.1	4.89	4096	3	0	0	465.255	1392.74	3	1392.72	0.0176	1	18.04	240	R	TNAENEFVTIKK	E			Cmpd 95, AutoMSn(465.2548), 15.2 min
13	gi|431921648	Keratin, type II cytoskeletal 1 [Pteropus alecto]	249	138067	23	6	8	4	7.1	4.89	4097	1	0	0	465.255	1392.74	3	1392.72	0.018	1	33.84	6.4	R	TNAENEFVTIKK	E			Cmpd 168, AutoMSn(465.2549), 15.2 min
13	gi|431921648	Keratin, type II cytoskeletal 1 [Pteropus alecto]	249	138067	23	6	8	4	7.1	4.89	4098	1	0	0	465.256	1392.75	3	1392.72	0.0217	1	30.37	14	R	TNAENEFVTIKK	E			Cmpd 201, AutoMSn(465.2561), 15.3 min
13	gi|431921648	Keratin, type II cytoskeletal 1 [Pteropus alecto]	249	138067	23	6	8	4	7.1	4.89	4283	1	0	0	738.398	1474.78	2	1474.78	0.0035	0	70.68	0.0013	R	FLEQQNQVLQTK	W			Cmpd 272, AutoMSn(738.3980), 17.5 min
13	gi|431921648	Keratin, type II cytoskeletal 1 [Pteropus alecto]	249	138067	23	6	8	4	7.1	4.89	4285	1	0	0	738.401	1474.79	2	1474.78	0.009	0	50.71	0.13	R	FLEQQNQVLQTK	W			Cmpd 275, AutoMSn(738.4008), 17.6 min
13	gi|431921648	Keratin, type II cytoskeletal 1 [Pteropus alecto]	249	138067	23	6	8	4	7.1	4.89	4286	1	0	0	738.401	1474.79	2	1474.78	0.0091	0	83.5	6.8e-05	R	FLEQQNQVLQTK	W			Cmpd 301, AutoMSn(738.4008), 17.6 min
13	gi|431921648	Keratin, type II cytoskeletal 1 [Pteropus alecto]	249	138067	23	6	8	4	7.1	4.89	4287	6	0	0	738.401	1474.79	2	1474.78	0.0093	0	16.59	340	R	FLEQQNQVLQTK	W			Cmpd 186, AutoMSn(738.4009), 17.5 min
13	gi|431921648	Keratin, type II cytoskeletal 1 [Pteropus alecto]	249	138067	23	6	8	4	7.1	4.89	4683	1	0	0	546.733	1637.18	3	1637.85	-0.6765	1	49.78	0.29	K	SLNNQFASFIDKVR	F			Cmpd 471, AutoMSn(546.7326), 21.4 min
13	gi|431921648	Keratin, type II cytoskeletal 1 [Pteropus alecto]	249	138067	23	6	8	4	7.1	4.89	4686	1	0	0	546.96	1637.86	3	1637.85	0.0056	1	39.25	1.7	K	SLNNQFASFIDKVR	F			Cmpd 472, AutoMSn(546.9600), 21.4 min
13	gi|431921648	Keratin, type II cytoskeletal 1 [Pteropus alecto]	249	138067	23	6	8	4	7.1	4.89	4687	2	0	0	546.961	1637.86	3	1637.85	0.0075	1	30.29	13	K	SLNNQFASFIDKVR	F			Cmpd 350, AutoMSn(546.9606), 21.4 min
13	gi|431921648	Keratin, type II cytoskeletal 1 [Pteropus alecto]	249	138067	23	6	8	4	7.1	4.89	4688	1	0	0	546.963	1637.87	3	1637.85	0.0152	1	82.08	8.8e-05	K	SLNNQFASFIDKVR	F			Cmpd 439, AutoMSn(546.9632), 21.3 min
13	gi|431921648	Keratin, type II cytoskeletal 1 [Pteropus alecto]	249	138067	23	6	8	4	7.1	4.89	4689	1	0	0	546.964	1637.87	3	1637.85	0.0185	1	36.51	3.2	K	SLNNQFASFIDKVR	F			Cmpd 477, AutoMSn(546.9643), 21.5 min
13	gi|431921648	Keratin, type II cytoskeletal 1 [Pteropus alecto]	249	138067	23	6	8	4	7.1	4.89	4693	1	0	0	546.966	1637.88	3	1637.85	0.0251	1	33.75	6	K	SLNNQFASFIDKVR	F			Cmpd 285, AutoMSn(546.9665), 21.3 min
13	gi|431921648	Keratin, type II cytoskeletal 1 [Pteropus alecto]	249	138067	23	6	8	4	7.1	4.89	4694	1	0	0	547.154	1638.44	3	1637.85	0.5866	1	57.91	0.043	K	SLNNQFASFIDKVR	F			Cmpd 442, AutoMSn(547.1536), 21.4 min	emPAI	0.18
14	gi|60593434	Chain A, Crystal Structure Of Stecrisp, A Member Of Crisp Family From Trimeresurus Stejnegeri Refined At 1.6 Angstroms Resolution: Structual Relationship Of The Two Domains	238	25112	22	5	4	1	18.1	5.53	1131	1	1	1	658.409	657.401	1	657.406	-0.0047	0	31.22	16	R	VIEGIK	C			Cmpd 129, AutoMSn(658.4086), 13.7 min
14	gi|60593434	Chain A, Crystal Structure Of Stecrisp, A Member Of Crisp Family From Trimeresurus Stejnegeri Refined At 1.6 Angstroms Resolution: Structual Relationship Of The Two Domains	238	25112	22	5	4	1	18.1	5.53	1132	1	1	1	658.409	657.402	1	657.406	-0.0039	0	27.76	35	R	VIEGIK	C			Cmpd 133, AutoMSn(658.4095), 13.8 min
14	gi|60593434	Chain A, Crystal Structure Of Stecrisp, A Member Of Crisp Family From Trimeresurus Stejnegeri Refined At 1.6 Angstroms Resolution: Structual Relationship Of The Two Domains	238	25112	22	5	4	1	18.1	5.53	1133	1	1	1	658.41	657.403	1	657.406	-0.0032	0	32.26	12	R	VIEGIK	C			Cmpd 130, AutoMSn(658.4102), 13.7 min
14	gi|60593434	Chain A, Crystal Structure Of Stecrisp, A Member Of Crisp Family From Trimeresurus Stejnegeri Refined At 1.6 Angstroms Resolution: Structual Relationship Of The Two Domains	238	25112	22	5	4	1	18.1	5.53	1135	1	1	1	329.712	657.41	2	657.406	0.0037	0	21.59	150	R	VIEGIK	C			Cmpd 132, AutoMSn(329.7122), 13.7 min
14	gi|60593434	Chain A, Crystal Structure Of Stecrisp, A Member Of Crisp Family From Trimeresurus Stejnegeri Refined At 1.6 Angstroms Resolution: Structual Relationship Of The Two Domains	238	25112	22	5	4	1	18.1	5.53	3025	1	1	1	583.263	1164.51	2	1164.5	0.0073	0	36.77	3.5	-	NVDFDSESPR	K			Cmpd 209, AutoMSn(583.2633), 15.5 min
14	gi|60593434	Chain A, Crystal Structure Of Stecrisp, A Member Of Crisp Family From Trimeresurus Stejnegeri Refined At 1.6 Angstroms Resolution: Structual Relationship Of The Two Domains	238	25112	22	5	4	1	18.1	5.53	3026	1	1	1	583.267	1164.52	2	1164.5	0.0149	0	21.97	110	-	NVDFDSESPR	K			Cmpd 213, AutoMSn(583.2671), 15.6 min
14	gi|60593434	Chain A, Crystal Structure Of Stecrisp, A Member Of Crisp Family From Trimeresurus Stejnegeri Refined At 1.6 Angstroms Resolution: Structual Relationship Of The Two Domains	238	25112	22	5	4	1	18.1	5.53	3149	1	1	1	595.307	1188.6	2	1188.59	0.0073	0	33.73	7.4	R	SVNPTASNMLR	M			Cmpd 238, AutoMSn(595.3070), 16.1 min
14	gi|60593434	Chain A, Crystal Structure Of Stecrisp, A Member Of Crisp Family From Trimeresurus Stejnegeri Refined At 1.6 Angstroms Resolution: Structual Relationship Of The Two Domains	238	25112	22	5	4	1	18.1	5.53	3150	1	1	1	595.307	1188.6	2	1188.59	0.0075	0	45.49	0.49	R	SVNPTASNMLR	M			Cmpd 241, AutoMSn(595.3071), 16.2 min
14	gi|60593434	Chain A, Crystal Structure Of Stecrisp, A Member Of Crisp Family From Trimeresurus Stejnegeri Refined At 1.6 Angstroms Resolution: Structual Relationship Of The Two Domains	238	25112	22	5	4	1	18.1	5.53	3151	1	1	1	595.307	1188.6	2	1188.59	0.0079	0	44.92	0.56	R	SVNPTASNMLR	M			Cmpd 245, AutoMSn(595.3073), 16.3 min
14	gi|60593434	Chain A, Crystal Structure Of Stecrisp, A Member Of Crisp Family From Trimeresurus Stejnegeri Refined At 1.6 Angstroms Resolution: Structual Relationship Of The Two Domains	238	25112	22	5	4	1	18.1	5.53	3224	1	1	1	603.303	1204.59	2	1204.59	0.0046	0	50.74	0.14	R	SVNPTASNMLR	M	Oxidation (M)	0.00000000200.0	Cmpd 141, AutoMSn(603.3031), 13.9 min
14	gi|60593434	Chain A, Crystal Structure Of Stecrisp, A Member Of Crisp Family From Trimeresurus Stejnegeri Refined At 1.6 Angstroms Resolution: Structual Relationship Of The Two Domains	238	25112	22	5	4	1	18.1	5.53	3225	1	1	1	603.304	1204.59	2	1204.59	0.0068	0	26.23	40	R	SVNPTASNMLR	M	Oxidation (M)	0.00000000200.0	Cmpd 145, AutoMSn(603.3042), 14.1 min
14	gi|60593434	Chain A, Crystal Structure Of Stecrisp, A Member Of Crisp Family From Trimeresurus Stejnegeri Refined At 1.6 Angstroms Resolution: Structual Relationship Of The Two Domains	238	25112	22	5	4	1	18.1	5.53	3226	1	1	1	603.304	1204.59	2	1204.59	0.0075	0	51.71	0.11	R	SVNPTASNMLR	M	Oxidation (M)	0.00000000200.0	Cmpd 142, AutoMSn(603.3045), 14.0 min
14	gi|60593434	Chain A, Crystal Structure Of Stecrisp, A Member Of Crisp Family From Trimeresurus Stejnegeri Refined At 1.6 Angstroms Resolution: Structual Relationship Of The Two Domains	238	25112	22	5	4	1	18.1	5.53	4560	1	1	1	791.34	1580.67	2	1580.66	0.0096	0	58.45	0.022	R	MEWYPEAADNAER	W			Cmpd 385, AutoMSn(791.3403), 19.4 min
14	gi|60593434	Chain A, Crystal Structure Of Stecrisp, A Member Of Crisp Family From Trimeresurus Stejnegeri Refined At 1.6 Angstroms Resolution: Structual Relationship Of The Two Domains	238	25112	22	5	4	1	18.1	5.53	4561	1	1	1	791.34	1580.67	2	1580.66	0.0098	0	61.24	0.012	R	MEWYPEAADNAER	W			Cmpd 379, AutoMSn(791.3404), 19.3 min
14	gi|60593434	Chain A, Crystal Structure Of Stecrisp, A Member Of Crisp Family From Trimeresurus Stejnegeri Refined At 1.6 Angstroms Resolution: Structual Relationship Of The Two Domains	238	25112	22	5	4	1	18.1	5.53	4562	1	1	1	791.341	1580.67	2	1580.66	0.01	0	16.79	330	R	MEWYPEAADNAER	W			Cmpd 285, AutoMSn(791.3405), 19.3 min
14	gi|60593434	Chain A, Crystal Structure Of Stecrisp, A Member Of Crisp Family From Trimeresurus Stejnegeri Refined At 1.6 Angstroms Resolution: Structual Relationship Of The Two Domains	238	25112	22	5	4	1	18.1	5.53	4563	1	1	1	791.341	1580.67	2	1580.66	0.0114	0	63.82	0.0065	R	MEWYPEAADNAER	W			Cmpd 382, AutoMSn(791.3412), 19.4 min
14	gi|60593434	Chain A, Crystal Structure Of Stecrisp, A Member Of Crisp Family From Trimeresurus Stejnegeri Refined At 1.6 Angstroms Resolution: Structual Relationship Of The Two Domains	238	25112	22	5	4	1	18.1	5.53	4564	8	1	1	791.343	1580.67	2	1580.66	0.0149	0	12.85	800	R	MEWYPEAADNAER	W			Cmpd 287, AutoMSn(791.3430), 19.3 min
14	gi|60593434	Chain A, Crystal Structure Of Stecrisp, A Member Of Crisp Family From Trimeresurus Stejnegeri Refined At 1.6 Angstroms Resolution: Structual Relationship Of The Two Domains	238	25112	22	5	4	1	18.1	5.53	4565	1	1	1	527.898	1580.67	3	1580.66	0.0162	0	45.55	0.43	R	MEWYPEAADNAER	W			Cmpd 383, AutoMSn(527.8982), 19.4 min
14	gi|60593434	Chain A, Crystal Structure Of Stecrisp, A Member Of Crisp Family From Trimeresurus Stejnegeri Refined At 1.6 Angstroms Resolution: Structual Relationship Of The Two Domains	238	25112	22	5	4	1	18.1	5.53	4595	1	1	1	798.934	1595.85	2	1596.65	-0.7973	0	66.46	0.0033	R	MEWYPEAADNAER	W	Oxidation (M)	0.2000000000000.0	Cmpd 315, AutoMSn(798.9343), 17.8 min
14	gi|60593434	Chain A, Crystal Structure Of Stecrisp, A Member Of Crisp Family From Trimeresurus Stejnegeri Refined At 1.6 Angstroms Resolution: Structual Relationship Of The Two Domains	238	25112	22	5	4	1	18.1	5.53	4597	1	1	1	799.338	1596.66	2	1596.65	0.0107	0	50.95	0.12	R	MEWYPEAADNAER	W	Oxidation (M)	0.2000000000000.0	Cmpd 319, AutoMSn(799.3383), 18.0 min
14	gi|60593434	Chain A, Crystal Structure Of Stecrisp, A Member Of Crisp Family From Trimeresurus Stejnegeri Refined At 1.6 Angstroms Resolution: Structual Relationship Of The Two Domains	238	25112	22	5	4	1	18.1	5.53	4598	1	1	1	799.338	1596.66	2	1596.65	0.0107	0	52.93	0.077	R	MEWYPEAADNAER	W	Oxidation (M)	0.2000000000000.0	Cmpd 316, AutoMSn(799.3384), 17.9 min
14	gi|60593434	Chain A, Crystal Structure Of Stecrisp, A Member Of Crisp Family From Trimeresurus Stejnegeri Refined At 1.6 Angstroms Resolution: Structual Relationship Of The Two Domains	238	25112	22	5	4	1	18.1	5.53	4599	1	1	1	533.234	1596.68	3	1596.65	0.0272	0	58.29	0.022	R	MEWYPEAADNAER	W	Oxidation (M)	0.2000000000000.0	Cmpd 317, AutoMSn(533.2335), 17.9 min	emPAI	1.12
15	gi|82211845	RecName: Full=Zinc metalloproteinase-disintegrin-like halysase; AltName: Full=Snake venom metalloproteinase; Short=SVMP; AltName: Full=Vascular apoptosis-inducing protein; Short=VAP; Flags: Precursor [Gloydius halys]	233	67607	17	4	5	3	9.7	5.71	3421	1	0	0	634.305	1266.6	2	1266.59	0.0046	0	31.51	11	R	LYCIDSSPANK	N	Carbamidomethyl (C)	0.00100000000.0	Cmpd 238, AutoMSn(634.3053), 16.2 min
15	gi|82211845	RecName: Full=Zinc metalloproteinase-disintegrin-like halysase; AltName: Full=Snake venom metalloproteinase; Short=SVMP; AltName: Full=Vascular apoptosis-inducing protein; Short=VAP; Flags: Precursor [Gloydius halys]	233	67607	17	4	5	3	9.7	5.71	3436	8	0	0	635.289	1268.56	2	1268.56	0.0065	1	16.71	330	R	SAECTDRFQR	N	Carbamidomethyl (C)	0.0001000000.0	Cmpd 42, AutoMSn(635.2889), 11.9 min
15	gi|82211845	RecName: Full=Zinc metalloproteinase-disintegrin-like halysase; AltName: Full=Snake venom metalloproteinase; Short=SVMP; AltName: Full=Vascular apoptosis-inducing protein; Short=VAP; Flags: Precursor [Gloydius halys]	233	67607	17	4	5	3	9.7	5.71	3441	1	0	0	423.863	1268.57	3	1268.56	0.0118	1	35.52	4.3	R	SAECTDRFQR	N	Carbamidomethyl (C)	0.0001000000.0	Cmpd 20, AutoMSn(423.8635), 11.8 min
15	gi|82211845	RecName: Full=Zinc metalloproteinase-disintegrin-like halysase; AltName: Full=Snake venom metalloproteinase; Short=SVMP; AltName: Full=Vascular apoptosis-inducing protein; Short=VAP; Flags: Precursor [Gloydius halys]	233	67607	17	4	5	3	9.7	5.71	3442	1	0	0	423.864	1268.57	3	1268.56	0.0125	1	55.21	0.046	R	SAECTDRFQR	N	Carbamidomethyl (C)	0.0001000000.0	Cmpd 56, AutoMSn(423.8637), 12.1 min
15	gi|82211845	RecName: Full=Zinc metalloproteinase-disintegrin-like halysase; AltName: Full=Snake venom metalloproteinase; Short=SVMP; AltName: Full=Vascular apoptosis-inducing protein; Short=VAP; Flags: Precursor [Gloydius halys]	233	67607	17	4	5	3	9.7	5.71	3444	1	0	0	423.864	1268.57	3	1268.56	0.014	1	51.94	0.098	R	SAECTDRFQR	N	Carbamidomethyl (C)	0.0001000000.0	Cmpd 48, AutoMSn(423.8642), 11.9 min
15	gi|82211845	RecName: Full=Zinc metalloproteinase-disintegrin-like halysase; AltName: Full=Snake venom metalloproteinase; Short=SVMP; AltName: Full=Vascular apoptosis-inducing protein; Short=VAP; Flags: Precursor [Gloydius halys]	233	67607	17	4	5	3	9.7	5.71	3445	1	0	0	423.864	1268.57	3	1268.56	0.0144	1	27.59	27	R	SAECTDRFQR	N	Carbamidomethyl (C)	0.0001000000.0	Cmpd 41, AutoMSn(423.8643), 11.9 min
15	gi|82211845	RecName: Full=Zinc metalloproteinase-disintegrin-like halysase; AltName: Full=Snake venom metalloproteinase; Short=SVMP; AltName: Full=Vascular apoptosis-inducing protein; Short=VAP; Flags: Precursor [Gloydius halys]	233	67607	17	4	5	3	9.7	5.71	3447	1	0	0	423.865	1268.57	3	1268.56	0.0156	1	38.25	2.3	R	SAECTDRFQR	N	Carbamidomethyl (C)	0.0001000000.0	Cmpd 17, AutoMSn(423.8647), 11.8 min
15	gi|82211845	RecName: Full=Zinc metalloproteinase-disintegrin-like halysase; AltName: Full=Snake venom metalloproteinase; Short=SVMP; AltName: Full=Vascular apoptosis-inducing protein; Short=VAP; Flags: Precursor [Gloydius halys]	233	67607	17	4	5	3	9.7	5.71	3448	1	0	0	423.865	1268.57	3	1268.56	0.0159	1	29.21	18	R	SAECTDRFQR	N	Carbamidomethyl (C)	0.0001000000.0	Cmpd 94, AutoMSn(423.8648), 11.9 min
15	gi|82211845	RecName: Full=Zinc metalloproteinase-disintegrin-like halysase; AltName: Full=Snake venom metalloproteinase; Short=SVMP; AltName: Full=Vascular apoptosis-inducing protein; Short=VAP; Flags: Precursor [Gloydius halys]	233	67607	17	4	5	3	9.7	5.71	3449	1	0	0	423.865	1268.57	3	1268.56	0.016	1	56.5	0.034	R	SAECTDRFQR	N	Carbamidomethyl (C)	0.0001000000.0	Cmpd 51, AutoMSn(423.8649), 12.0 min
15	gi|82211845	RecName: Full=Zinc metalloproteinase-disintegrin-like halysase; AltName: Full=Snake venom metalloproteinase; Short=SVMP; AltName: Full=Vascular apoptosis-inducing protein; Short=VAP; Flags: Precursor [Gloydius halys]	233	67607	17	4	5	3	9.7	5.71	3450	1	0	0	423.868	1268.58	3	1268.56	0.0264	1	52	0.095	R	SAECTDRFQR	N	Carbamidomethyl (C)	0.0001000000.0	Cmpd 39, AutoMSn(423.8683), 11.9 min
15	gi|82211845	RecName: Full=Zinc metalloproteinase-disintegrin-like halysase; AltName: Full=Snake venom metalloproteinase; Short=SVMP; AltName: Full=Vascular apoptosis-inducing protein; Short=VAP; Flags: Precursor [Gloydius halys]	233	67607	17	4	5	3	9.7	5.71	5321	1	0	0	906.852	1811.69	2	1811.68	0.0093	0	74.47	0.00067	R	QGAQCAEGLCCDQCR	F	4 Carbamidomethyl (C)	0.000010000110010.0	Cmpd 144, AutoMSn(906.8523), 14.1 min
15	gi|82211845	RecName: Full=Zinc metalloproteinase-disintegrin-like halysase; AltName: Full=Snake venom metalloproteinase; Short=SVMP; AltName: Full=Vascular apoptosis-inducing protein; Short=VAP; Flags: Precursor [Gloydius halys]	233	67607	17	4	5	3	9.7	5.71	5322	1	0	0	906.854	1811.69	2	1811.68	0.012	0	42.49	1	R	QGAQCAEGLCCDQCR	F	4 Carbamidomethyl (C)	0.000010000110010.0	Cmpd 148, AutoMSn(906.8536), 14.1 min
15	gi|82211845	RecName: Full=Zinc metalloproteinase-disintegrin-like halysase; AltName: Full=Snake venom metalloproteinase; Short=SVMP; AltName: Full=Vascular apoptosis-inducing protein; Short=VAP; Flags: Precursor [Gloydius halys]	233	67607	17	4	5	3	9.7	5.71	5325	1	0	0	604.908	1811.7	3	1811.68	0.0221	0	45.49	0.51	R	QGAQCAEGLCCDQCR	F	4 Carbamidomethyl (C)	0.000010000110010.0	Cmpd 149, AutoMSn(604.9082), 14.1 min
15	gi|82211845	RecName: Full=Zinc metalloproteinase-disintegrin-like halysase; AltName: Full=Snake venom metalloproteinase; Short=SVMP; AltName: Full=Vascular apoptosis-inducing protein; Short=VAP; Flags: Precursor [Gloydius halys]	233	67607	17	4	5	3	9.7	5.71	5815	1	0	0	694.635	2080.88	3	2080.87	0.0186	1	85.74	3.6e-05	K	LRQGAQCAEGLCCDQCR	F	4 Carbamidomethyl (C)	0.00000010000110010.0	Cmpd 125, AutoMSn(694.6355), 13.6 min
15	gi|82211845	RecName: Full=Zinc metalloproteinase-disintegrin-like halysase; AltName: Full=Snake venom metalloproteinase; Short=SVMP; AltName: Full=Vascular apoptosis-inducing protein; Short=VAP; Flags: Precursor [Gloydius halys]	233	67607	17	4	5	3	9.7	5.71	5816	1	0	0	694.637	2080.89	3	2080.87	0.0236	1	50.36	0.12	K	LRQGAQCAEGLCCDQCR	F	4 Carbamidomethyl (C)	0.00000010000110010.0	Cmpd 127, AutoMSn(694.6371), 13.7 min
15	gi|82211845	RecName: Full=Zinc metalloproteinase-disintegrin-like halysase; AltName: Full=Snake venom metalloproteinase; Short=SVMP; AltName: Full=Vascular apoptosis-inducing protein; Short=VAP; Flags: Precursor [Gloydius halys]	233	67607	17	4	5	3	9.7	5.71	6271	1	1	1	801.009	2400	3	2399.99	0.0183	0	39.32	1.6	K	SCVMAGTLSCEASYLFSDCSR	K	3 Carbamidomethyl (C)	0.010000000100000000100.0	Cmpd 525, AutoMSn(801.0085), 22.6 min
15	gi|82211845	RecName: Full=Zinc metalloproteinase-disintegrin-like halysase; AltName: Full=Snake venom metalloproteinase; Short=SVMP; AltName: Full=Vascular apoptosis-inducing protein; Short=VAP; Flags: Precursor [Gloydius halys]	233	67607	17	4	5	3	9.7	5.71	6272	1	1	1	801.014	2400.02	3	2399.99	0.0332	0	35.32	3.7	K	SCVMAGTLSCEASYLFSDCSR	K	3 Carbamidomethyl (C)	0.010000000100000000100.0	Cmpd 528, AutoMSn(801.0135), 22.6 min	emPAI	0.33
16	gi|444731089	Keratin, type II cytoskeletal 1 [Tupaia chinensis]	232	126035	25	9	5	4	4.7	5.08	2426	1	0	0	517.262	1032.51	2	1032.51	0	0	40.19	1.8	R	TLLEGEESR	M			Cmpd 115, AutoMSn(517.2616), 14.8 min
16	gi|444731089	Keratin, type II cytoskeletal 1 [Tupaia chinensis]	232	126035	25	9	5	4	4.7	5.08	2427	1	0	0	517.263	1032.51	2	1032.51	0.0031	0	30.45	17	R	TLLEGEESR	M			Cmpd 18, AutoMSn(517.2632), 14.8 min
16	gi|444731089	Keratin, type II cytoskeletal 1 [Tupaia chinensis]	232	126035	25	9	5	4	4.7	5.08	2428	1	0	0	517.263	1032.51	2	1032.51	0.0032	0	59.02	0.024	R	TLLEGEESR	M			Cmpd 181, AutoMSn(517.2632), 14.9 min
16	gi|444731089	Keratin, type II cytoskeletal 1 [Tupaia chinensis]	232	126035	25	9	5	4	4.7	5.08	2429	1	0	0	517.263	1032.51	2	1032.51	0.0034	0	55.38	0.055	R	TLLEGEESR	M			Cmpd 150, AutoMSn(517.2633), 14.8 min
16	gi|444731089	Keratin, type II cytoskeletal 1 [Tupaia chinensis]	232	126035	25	9	5	4	4.7	5.08	2430	1	0	0	517.264	1032.51	2	1032.51	0.0047	0	58.91	0.024	R	TLLEGEESR	M			Cmpd 178, AutoMSn(517.2640), 14.8 min
16	gi|444731089	Keratin, type II cytoskeletal 1 [Tupaia chinensis]	232	126035	25	9	5	4	4.7	5.08	2432	1	0	0	517.265	1032.52	2	1032.51	0.0077	0	33.81	7.8	R	TLLEGEESR	M			Cmpd 157, AutoMSn(517.2655), 14.9 min
16	gi|444731089	Keratin, type II cytoskeletal 1 [Tupaia chinensis]	232	126035	25	9	5	4	4.7	5.08	2433	1	0	0	517.266	1032.52	2	1032.51	0.008	0	21.02	150	R	TLLEGEESR	M			Cmpd 80, AutoMSn(517.2656), 14.8 min
16	gi|444731089	Keratin, type II cytoskeletal 1 [Tupaia chinensis]	232	126035	25	9	5	4	4.7	5.08	2470	1	1	0	521.283	1040.55	2	1040.55	0.0018	0	21.41	110	K	VDPEIQNVK	S			Cmpd 186, AutoMSn(521.2833), 14.9 min
16	gi|444731089	Keratin, type II cytoskeletal 1 [Tupaia chinensis]	232	126035	25	9	5	4	4.7	5.08	2471	1	1	0	521.287	1040.56	2	1040.55	0.0093	0	21.59	100	K	VDPEIQNVK	S			Cmpd 189, AutoMSn(521.2870), 15.0 min
16	gi|444731089	Keratin, type II cytoskeletal 1 [Tupaia chinensis]	232	126035	25	9	5	4	4.7	5.08	3517	1	0	0	651.862	1301.71	2	1301.71	0.0016	0	51.26	0.12	R	SLDLDSIIAEVK	A			Cmpd 597, AutoMSn(651.8620), 26.0 min
16	gi|444731089	Keratin, type II cytoskeletal 1 [Tupaia chinensis]	232	126035	25	9	5	4	4.7	5.08	3520	1	0	0	651.864	1301.71	2	1301.71	0.0046	0	55.33	0.047	R	SLDLDSIIAEVK	A			Cmpd 416, AutoMSn(651.8635), 25.9 min
16	gi|444731089	Keratin, type II cytoskeletal 1 [Tupaia chinensis]	232	126035	25	9	5	4	4.7	5.08	3522	1	0	0	651.864	1301.71	2	1301.71	0.0057	0	68.08	0.0025	R	SLDLDSIIAEVK	A			Cmpd 654, AutoMSn(651.8640), 26.0 min
16	gi|444731089	Keratin, type II cytoskeletal 1 [Tupaia chinensis]	232	126035	25	9	5	4	4.7	5.08	3523	1	0	0	651.864	1301.71	2	1301.71	0.0059	0	33	8	R	SLDLDSIIAEVK	A			Cmpd 594, AutoMSn(651.8641), 25.9 min
16	gi|444731089	Keratin, type II cytoskeletal 1 [Tupaia chinensis]	232	126035	25	9	5	4	4.7	5.08	3525	1	0	0	651.865	1301.71	2	1301.71	0.0068	0	73.31	0.00074	R	SLDLDSIIAEVK	A			Cmpd 651, AutoMSn(651.8646), 25.9 min
16	gi|444731089	Keratin, type II cytoskeletal 1 [Tupaia chinensis]	232	126035	25	9	5	4	4.7	5.08	3528	1	0	0	651.866	1301.72	2	1301.71	0.0092	0	21.91	100	R	SLDLDSIIAEVK	A			Cmpd 658, AutoMSn(651.8658), 25.9 min
16	gi|444731089	Keratin, type II cytoskeletal 1 [Tupaia chinensis]	232	126035	25	9	5	4	4.7	5.08	3529	1	0	0	651.866	1301.72	2	1301.71	0.0095	0	38.59	2.2	R	SLDLDSIIAEVK	A			Cmpd 591, AutoMSn(651.8659), 25.8 min
16	gi|444731089	Keratin, type II cytoskeletal 1 [Tupaia chinensis]	232	126035	25	9	5	4	4.7	5.08	3531	4	0	0	651.868	1301.72	2	1301.71	0.0137	0	23.39	73	R	SLDLDSIIAEVK	A			Cmpd 648, AutoMSn(651.8680), 25.8 min
16	gi|444731089	Keratin, type II cytoskeletal 1 [Tupaia chinensis]	232	126035	25	9	5	4	4.7	5.08	4095	1	0	0	465.254	1392.74	3	1392.72	0.0159	1	78.52	0.00022	R	TNAENEFVTIKK	D			Cmpd 198, AutoMSn(465.2542), 15.2 min
16	gi|444731089	Keratin, type II cytoskeletal 1 [Tupaia chinensis]	232	126035	25	9	5	4	4.7	5.08	4096	3	0	0	465.255	1392.74	3	1392.72	0.0176	1	18.04	240	R	TNAENEFVTIKK	D			Cmpd 95, AutoMSn(465.2548), 15.2 min
16	gi|444731089	Keratin, type II cytoskeletal 1 [Tupaia chinensis]	232	126035	25	9	5	4	4.7	5.08	4097	1	0	0	465.255	1392.74	3	1392.72	0.018	1	33.84	6.4	R	TNAENEFVTIKK	D			Cmpd 168, AutoMSn(465.2549), 15.2 min
16	gi|444731089	Keratin, type II cytoskeletal 1 [Tupaia chinensis]	232	126035	25	9	5	4	4.7	5.08	4098	1	0	0	465.256	1392.75	3	1392.72	0.0217	1	30.37	14	R	TNAENEFVTIKK	D			Cmpd 201, AutoMSn(465.2561), 15.3 min
16	gi|444731089	Keratin, type II cytoskeletal 1 [Tupaia chinensis]	232	126035	25	9	5	4	4.7	5.08	4283	1	0	0	738.398	1474.78	2	1474.78	0.0035	0	70.68	0.0013	R	FLEQQNQVLQTK	W			Cmpd 272, AutoMSn(738.3980), 17.5 min
16	gi|444731089	Keratin, type II cytoskeletal 1 [Tupaia chinensis]	232	126035	25	9	5	4	4.7	5.08	4285	1	0	0	738.401	1474.79	2	1474.78	0.009	0	50.71	0.13	R	FLEQQNQVLQTK	W			Cmpd 275, AutoMSn(738.4008), 17.6 min
16	gi|444731089	Keratin, type II cytoskeletal 1 [Tupaia chinensis]	232	126035	25	9	5	4	4.7	5.08	4286	1	0	0	738.401	1474.79	2	1474.78	0.0091	0	83.5	6.8e-05	R	FLEQQNQVLQTK	W			Cmpd 301, AutoMSn(738.4008), 17.6 min
16	gi|444731089	Keratin, type II cytoskeletal 1 [Tupaia chinensis]	232	126035	25	9	5	4	4.7	5.08	4287	6	0	0	738.401	1474.79	2	1474.78	0.0093	0	16.59	340	R	FLEQQNQVLQTK	W			Cmpd 186, AutoMSn(738.4009), 17.5 min	emPAI	0.11
17	gi|395455158	RecName: Full=Zinc metalloproteinase-disintegrin-like lachestatin-1; AltName: Full=Snake venom metalloprotease; Short=SVMP; AltName: Full=Vascular apoptosis-inducing protein-like; Short=VAP-like [Lachesis muta rhombeata]	224	46768	16	4	4	3	11.4	7.44	3436	8	0	0	635.289	1268.56	2	1268.56	0.0065	1	16.71	330	R	SAECTDRFQR	N	Carbamidomethyl (C)	0.0001000000.0	Cmpd 42, AutoMSn(635.2889), 11.9 min
17	gi|395455158	RecName: Full=Zinc metalloproteinase-disintegrin-like lachestatin-1; AltName: Full=Snake venom metalloprotease; Short=SVMP; AltName: Full=Vascular apoptosis-inducing protein-like; Short=VAP-like [Lachesis muta rhombeata]	224	46768	16	4	4	3	11.4	7.44	3441	1	0	0	423.863	1268.57	3	1268.56	0.0118	1	35.52	4.3	R	SAECTDRFQR	N	Carbamidomethyl (C)	0.0001000000.0	Cmpd 20, AutoMSn(423.8635), 11.8 min
17	gi|395455158	RecName: Full=Zinc metalloproteinase-disintegrin-like lachestatin-1; AltName: Full=Snake venom metalloprotease; Short=SVMP; AltName: Full=Vascular apoptosis-inducing protein-like; Short=VAP-like [Lachesis muta rhombeata]	224	46768	16	4	4	3	11.4	7.44	3442	1	0	0	423.864	1268.57	3	1268.56	0.0125	1	55.21	0.046	R	SAECTDRFQR	N	Carbamidomethyl (C)	0.0001000000.0	Cmpd 56, AutoMSn(423.8637), 12.1 min
17	gi|395455158	RecName: Full=Zinc metalloproteinase-disintegrin-like lachestatin-1; AltName: Full=Snake venom metalloprotease; Short=SVMP; AltName: Full=Vascular apoptosis-inducing protein-like; Short=VAP-like [Lachesis muta rhombeata]	224	46768	16	4	4	3	11.4	7.44	3444	1	0	0	423.864	1268.57	3	1268.56	0.014	1	51.94	0.098	R	SAECTDRFQR	N	Carbamidomethyl (C)	0.0001000000.0	Cmpd 48, AutoMSn(423.8642), 11.9 min
17	gi|395455158	RecName: Full=Zinc metalloproteinase-disintegrin-like lachestatin-1; AltName: Full=Snake venom metalloprotease; Short=SVMP; AltName: Full=Vascular apoptosis-inducing protein-like; Short=VAP-like [Lachesis muta rhombeata]	224	46768	16	4	4	3	11.4	7.44	3445	1	0	0	423.864	1268.57	3	1268.56	0.0144	1	27.59	27	R	SAECTDRFQR	N	Carbamidomethyl (C)	0.0001000000.0	Cmpd 41, AutoMSn(423.8643), 11.9 min
17	gi|395455158	RecName: Full=Zinc metalloproteinase-disintegrin-like lachestatin-1; AltName: Full=Snake venom metalloprotease; Short=SVMP; AltName: Full=Vascular apoptosis-inducing protein-like; Short=VAP-like [Lachesis muta rhombeata]	224	46768	16	4	4	3	11.4	7.44	3447	1	0	0	423.865	1268.57	3	1268.56	0.0156	1	38.25	2.3	R	SAECTDRFQR	N	Carbamidomethyl (C)	0.0001000000.0	Cmpd 17, AutoMSn(423.8647), 11.8 min
17	gi|395455158	RecName: Full=Zinc metalloproteinase-disintegrin-like lachestatin-1; AltName: Full=Snake venom metalloprotease; Short=SVMP; AltName: Full=Vascular apoptosis-inducing protein-like; Short=VAP-like [Lachesis muta rhombeata]	224	46768	16	4	4	3	11.4	7.44	3448	1	0	0	423.865	1268.57	3	1268.56	0.0159	1	29.21	18	R	SAECTDRFQR	N	Carbamidomethyl (C)	0.0001000000.0	Cmpd 94, AutoMSn(423.8648), 11.9 min
17	gi|395455158	RecName: Full=Zinc metalloproteinase-disintegrin-like lachestatin-1; AltName: Full=Snake venom metalloprotease; Short=SVMP; AltName: Full=Vascular apoptosis-inducing protein-like; Short=VAP-like [Lachesis muta rhombeata]	224	46768	16	4	4	3	11.4	7.44	3449	1	0	0	423.865	1268.57	3	1268.56	0.016	1	56.5	0.034	R	SAECTDRFQR	N	Carbamidomethyl (C)	0.0001000000.0	Cmpd 51, AutoMSn(423.8649), 12.0 min
17	gi|395455158	RecName: Full=Zinc metalloproteinase-disintegrin-like lachestatin-1; AltName: Full=Snake venom metalloprotease; Short=SVMP; AltName: Full=Vascular apoptosis-inducing protein-like; Short=VAP-like [Lachesis muta rhombeata]	224	46768	16	4	4	3	11.4	7.44	3450	1	0	0	423.868	1268.58	3	1268.56	0.0264	1	52	0.095	R	SAECTDRFQR	N	Carbamidomethyl (C)	0.0001000000.0	Cmpd 39, AutoMSn(423.8683), 11.9 min
17	gi|395455158	RecName: Full=Zinc metalloproteinase-disintegrin-like lachestatin-1; AltName: Full=Snake venom metalloprotease; Short=SVMP; AltName: Full=Vascular apoptosis-inducing protein-like; Short=VAP-like [Lachesis muta rhombeata]	224	46768	16	4	4	3	11.4	7.44	5321	1	0	0	906.852	1811.69	2	1811.68	0.0093	0	74.47	0.00067	R	QGAQCAEGLCCDQCR	F	4 Carbamidomethyl (C)	0.000010000110010.0	Cmpd 144, AutoMSn(906.8523), 14.1 min
17	gi|395455158	RecName: Full=Zinc metalloproteinase-disintegrin-like lachestatin-1; AltName: Full=Snake venom metalloprotease; Short=SVMP; AltName: Full=Vascular apoptosis-inducing protein-like; Short=VAP-like [Lachesis muta rhombeata]	224	46768	16	4	4	3	11.4	7.44	5322	1	0	0	906.854	1811.69	2	1811.68	0.012	0	42.49	1	R	QGAQCAEGLCCDQCR	F	4 Carbamidomethyl (C)	0.000010000110010.0	Cmpd 148, AutoMSn(906.8536), 14.1 min
17	gi|395455158	RecName: Full=Zinc metalloproteinase-disintegrin-like lachestatin-1; AltName: Full=Snake venom metalloprotease; Short=SVMP; AltName: Full=Vascular apoptosis-inducing protein-like; Short=VAP-like [Lachesis muta rhombeata]	224	46768	16	4	4	3	11.4	7.44	5325	1	0	0	604.908	1811.7	3	1811.68	0.0221	0	45.49	0.51	R	QGAQCAEGLCCDQCR	F	4 Carbamidomethyl (C)	0.000010000110010.0	Cmpd 149, AutoMSn(604.9082), 14.1 min
17	gi|395455158	RecName: Full=Zinc metalloproteinase-disintegrin-like lachestatin-1; AltName: Full=Snake venom metalloprotease; Short=SVMP; AltName: Full=Vascular apoptosis-inducing protein-like; Short=VAP-like [Lachesis muta rhombeata]	224	46768	16	4	4	3	11.4	7.44	5815	1	0	0	694.635	2080.88	3	2080.87	0.0186	1	85.74	3.6e-05	K	LRQGAQCAEGLCCDQCR	F	4 Carbamidomethyl (C)	0.00000010000110010.0	Cmpd 125, AutoMSn(694.6355), 13.6 min
17	gi|395455158	RecName: Full=Zinc metalloproteinase-disintegrin-like lachestatin-1; AltName: Full=Snake venom metalloprotease; Short=SVMP; AltName: Full=Vascular apoptosis-inducing protein-like; Short=VAP-like [Lachesis muta rhombeata]	224	46768	16	4	4	3	11.4	7.44	5816	1	0	0	694.637	2080.89	3	2080.87	0.0236	1	50.36	0.12	K	LRQGAQCAEGLCCDQCR	F	4 Carbamidomethyl (C)	0.00000010000110010.0	Cmpd 127, AutoMSn(694.6371), 13.7 min
17	gi|395455158	RecName: Full=Zinc metalloproteinase-disintegrin-like lachestatin-1; AltName: Full=Snake venom metalloprotease; Short=SVMP; AltName: Full=Vascular apoptosis-inducing protein-like; Short=VAP-like [Lachesis muta rhombeata]	224	46768	16	4	4	3	11.4	7.44	6250	2	1	1	796.01	2385.01	3	2384.97	0.0335	0	23.22	61	R	SCVMAGTLSCEPSYLFSDCSR	R	2 Carbamidomethyl (C); Oxidation (M)	0.010200000000000000100.0	Cmpd 589, AutoMSn(796.0100), 24.1 min
17	gi|395455158	RecName: Full=Zinc metalloproteinase-disintegrin-like lachestatin-1; AltName: Full=Snake venom metalloprotease; Short=SVMP; AltName: Full=Vascular apoptosis-inducing protein-like; Short=VAP-like [Lachesis muta rhombeata]	224	46768	16	4	4	3	11.4	7.44	6294	4	1	1	809.658	2425.95	3	2426	-0.0478	0	19.81	160	R	SCVMAGTLSCEPSYLFSDCSR	R	3 Carbamidomethyl (C)	0.010000000100000000100.0	Cmpd 376, AutoMSn(809.6584), 19.8 min	emPAI	0.31
18	gi|538259847	5~ nucleotidase, partial [Protobothrops flavoviridis]	203	57055	13	7	7	3	15.1	8.27	1956	1	1	1	430.25	858.486	2	858.481	0.0046	0	53.36	0.098	K	IINVGSEK	V			Cmpd 105, AutoMSn(430.2501), 13.8 min
18	gi|538259847	5~ nucleotidase, partial [Protobothrops flavoviridis]	203	57055	13	7	7	3	15.1	8.27	1957	1	1	1	430.251	858.487	2	858.481	0.0057	0	36.23	5.1	K	IINVGSEK	V			Cmpd 103, AutoMSn(430.2506), 13.7 min
18	gi|538259847	5~ nucleotidase, partial [Protobothrops flavoviridis]	203	57055	13	7	7	3	15.1	8.27	2095	1	1	0	445.744	889.473	2	889.466	0.0075	0	24.79	66	K	VYPAVEGR	V			Cmpd 117, AutoMSn(445.7439), 14.0 min
18	gi|538259847	5~ nucleotidase, partial [Protobothrops flavoviridis]	203	57055	13	7	7	3	15.1	8.27	2274	1	1	0	476.281	950.547	2	950.544	0.0034	0	66.38	0.0041	K	VGIIGYTTK	E			Cmpd 271, AutoMSn(476.2808), 17.5 min
18	gi|538259847	5~ nucleotidase, partial [Protobothrops flavoviridis]	203	57055	13	7	7	3	15.1	8.27	2275	1	1	0	476.281	950.548	2	950.544	0.0038	0	66.71	0.0038	K	VGIIGYTTK	E			Cmpd 266, AutoMSn(476.2810), 17.4 min
18	gi|538259847	5~ nucleotidase, partial [Protobothrops flavoviridis]	203	57055	13	7	7	3	15.1	8.27	2276	1	1	0	476.282	950.549	2	950.544	0.0056	0	66.55	0.0039	K	VGIIGYTTK	E			Cmpd 268, AutoMSn(476.2819), 17.4 min
18	gi|538259847	5~ nucleotidase, partial [Protobothrops flavoviridis]	203	57055	13	7	7	3	15.1	8.27	2412	1	1	0	513.801	1025.59	2	1025.59	0.0005	0	21.45	110	K	ASGNPILLNK	D			Cmpd 225, AutoMSn(513.8010), 16.4 min
18	gi|538259847	5~ nucleotidase, partial [Protobothrops flavoviridis]	203	57055	13	7	7	3	15.1	8.27	3535	1	1	0	653.864	1305.71	2	1305.71	0.0048	0	29.65	17	R	QVPVVQAYAFGK	Y			Cmpd 383, AutoMSn(653.8638), 20.0 min
18	gi|538259847	5~ nucleotidase, partial [Protobothrops flavoviridis]	203	57055	13	7	7	3	15.1	8.27	3536	1	1	0	653.865	1305.72	2	1305.71	0.0075	0	56.67	0.034	R	QVPVVQAYAFGK	Y			Cmpd 386, AutoMSn(653.8651), 20.1 min
18	gi|538259847	5~ nucleotidase, partial [Protobothrops flavoviridis]	203	57055	13	7	7	3	15.1	8.27	3537	1	1	0	653.866	1305.72	2	1305.71	0.0094	0	63.63	0.0068	R	QVPVVQAYAFGK	Y			Cmpd 389, AutoMSn(653.8661), 20.2 min
18	gi|538259847	5~ nucleotidase, partial [Protobothrops flavoviridis]	203	57055	13	7	7	3	15.1	8.27	4489	1	1	1	519.284	1554.83	3	1554.82	0.0148	0	65.05	0.0046	K	IIALGHSGFLEDQR	I			Cmpd 339, AutoMSn(519.2840), 19.0 min
18	gi|538259847	5~ nucleotidase, partial [Protobothrops flavoviridis]	203	57055	13	7	7	3	15.1	8.27	4490	1	1	1	519.284	1554.83	3	1554.82	0.0163	0	94.3	5.5e-06	K	IIALGHSGFLEDQR	I			Cmpd 342, AutoMSn(519.2845), 19.1 min
18	gi|538259847	5~ nucleotidase, partial [Protobothrops flavoviridis]	203	57055	13	7	7	3	15.1	8.27	5589	1	1	1	657.697	1970.07	3	1970.05	0.0163	1	39.28	1.6	K	YLGYLNVIFDDKGNVIK	A			Cmpd 540, AutoMSn(657.6965), 24.1 min	emPAI	0.32
19	gi|146741296	keratin 1 [Sus scrofa]	198	65160	22	7	5	3	8.4	8.17	2017	1	0	0	437.754	873.494	2	873.492	0.002	0	39.78	2.2	R	SLVNLGGSK	S			Cmpd 214, AutoMSn(437.7543), 16.2 min
19	gi|146741296	keratin 1 [Sus scrofa]	198	65160	22	7	5	3	8.4	8.17	2018	1	0	0	437.754	873.494	2	873.492	0.0022	0	34.71	7.1	R	SLVNLGGSK	S			Cmpd 242, AutoMSn(437.7544), 16.2 min
19	gi|146741296	keratin 1 [Sus scrofa]	198	65160	22	7	5	3	8.4	8.17	2426	1	0	0	517.262	1032.51	2	1032.51	0	0	40.19	1.8	R	TLLEGEESR	M			Cmpd 115, AutoMSn(517.2616), 14.8 min
19	gi|146741296	keratin 1 [Sus scrofa]	198	65160	22	7	5	3	8.4	8.17	2427	1	0	0	517.263	1032.51	2	1032.51	0.0031	0	30.45	17	R	TLLEGEESR	M			Cmpd 18, AutoMSn(517.2632), 14.8 min
19	gi|146741296	keratin 1 [Sus scrofa]	198	65160	22	7	5	3	8.4	8.17	2428	1	0	0	517.263	1032.51	2	1032.51	0.0032	0	59.02	0.024	R	TLLEGEESR	M			Cmpd 181, AutoMSn(517.2632), 14.9 min
19	gi|146741296	keratin 1 [Sus scrofa]	198	65160	22	7	5	3	8.4	8.17	2429	1	0	0	517.263	1032.51	2	1032.51	0.0034	0	55.38	0.055	R	TLLEGEESR	M			Cmpd 150, AutoMSn(517.2633), 14.8 min
19	gi|146741296	keratin 1 [Sus scrofa]	198	65160	22	7	5	3	8.4	8.17	2430	1	0	0	517.264	1032.51	2	1032.51	0.0047	0	58.91	0.024	R	TLLEGEESR	M			Cmpd 178, AutoMSn(517.2640), 14.8 min
19	gi|146741296	keratin 1 [Sus scrofa]	198	65160	22	7	5	3	8.4	8.17	2432	1	0	0	517.265	1032.52	2	1032.51	0.0077	0	33.81	7.8	R	TLLEGEESR	M			Cmpd 157, AutoMSn(517.2655), 14.9 min
19	gi|146741296	keratin 1 [Sus scrofa]	198	65160	22	7	5	3	8.4	8.17	2433	1	0	0	517.266	1032.52	2	1032.51	0.008	0	21.02	150	R	TLLEGEESR	M			Cmpd 80, AutoMSn(517.2656), 14.8 min
19	gi|146741296	keratin 1 [Sus scrofa]	198	65160	22	7	5	3	8.4	8.17	2785	1	0	0	554.276	1106.54	2	1106.54	0.0022	0	27.05	35	K	AQYEEIAQR	S			Cmpd 131, AutoMSn(554.2762), 14.3 min
19	gi|146741296	keratin 1 [Sus scrofa]	198	65160	22	7	5	3	8.4	8.17	2786	1	0	0	554.277	1106.54	2	1106.54	0.0038	0	41.08	1.4	K	AQYEEIAQR	S			Cmpd 157, AutoMSn(554.2770), 14.3 min
19	gi|146741296	keratin 1 [Sus scrofa]	198	65160	22	7	5	3	8.4	8.17	4283	1	0	0	738.398	1474.78	2	1474.78	0.0035	0	70.68	0.0013	R	FLEQQNQVLQTK	W			Cmpd 272, AutoMSn(738.3980), 17.5 min
19	gi|146741296	keratin 1 [Sus scrofa]	198	65160	22	7	5	3	8.4	8.17	4285	1	0	0	738.401	1474.79	2	1474.78	0.009	0	50.71	0.13	R	FLEQQNQVLQTK	W			Cmpd 275, AutoMSn(738.4008), 17.6 min
19	gi|146741296	keratin 1 [Sus scrofa]	198	65160	22	7	5	3	8.4	8.17	4286	1	0	0	738.401	1474.79	2	1474.78	0.0091	0	83.5	6.8e-05	R	FLEQQNQVLQTK	W			Cmpd 301, AutoMSn(738.4008), 17.6 min
19	gi|146741296	keratin 1 [Sus scrofa]	198	65160	22	7	5	3	8.4	8.17	4287	6	0	0	738.401	1474.79	2	1474.78	0.0093	0	16.59	340	R	FLEQQNQVLQTK	W			Cmpd 186, AutoMSn(738.4009), 17.5 min
19	gi|146741296	keratin 1 [Sus scrofa]	198	65160	22	7	5	3	8.4	8.17	4683	1	0	0	546.733	1637.18	3	1637.85	-0.6765	1	49.78	0.29	K	SLNNQFASFIDKVR	F			Cmpd 471, AutoMSn(546.7326), 21.4 min
19	gi|146741296	keratin 1 [Sus scrofa]	198	65160	22	7	5	3	8.4	8.17	4686	1	0	0	546.96	1637.86	3	1637.85	0.0056	1	39.25	1.7	K	SLNNQFASFIDKVR	F			Cmpd 472, AutoMSn(546.9600), 21.4 min
19	gi|146741296	keratin 1 [Sus scrofa]	198	65160	22	7	5	3	8.4	8.17	4687	2	0	0	546.961	1637.86	3	1637.85	0.0075	1	30.29	13	K	SLNNQFASFIDKVR	F			Cmpd 350, AutoMSn(546.9606), 21.4 min
19	gi|146741296	keratin 1 [Sus scrofa]	198	65160	22	7	5	3	8.4	8.17	4688	1	0	0	546.963	1637.87	3	1637.85	0.0152	1	82.08	8.8e-05	K	SLNNQFASFIDKVR	F			Cmpd 439, AutoMSn(546.9632), 21.3 min
19	gi|146741296	keratin 1 [Sus scrofa]	198	65160	22	7	5	3	8.4	8.17	4689	1	0	0	546.964	1637.87	3	1637.85	0.0185	1	36.51	3.2	K	SLNNQFASFIDKVR	F			Cmpd 477, AutoMSn(546.9643), 21.5 min
19	gi|146741296	keratin 1 [Sus scrofa]	198	65160	22	7	5	3	8.4	8.17	4693	1	0	0	546.966	1637.88	3	1637.85	0.0251	1	33.75	6	K	SLNNQFASFIDKVR	F			Cmpd 285, AutoMSn(546.9665), 21.3 min
19	gi|146741296	keratin 1 [Sus scrofa]	198	65160	22	7	5	3	8.4	8.17	4694	1	0	0	547.154	1638.44	3	1637.85	0.5866	1	57.91	0.043	K	SLNNQFASFIDKVR	F			Cmpd 442, AutoMSn(547.1536), 21.4 min	emPAI	0.28
20	gi|528763338	hypothetical protein CB1_000606063 [Camelus ferus]	192	116723	17	6	5	3	5.3	5.98	2785	1	0	0	554.276	1106.54	2	1106.54	0.0022	0	27.05	35	K	AQYEEIAQR	S			Cmpd 131, AutoMSn(554.2762), 14.3 min
20	gi|528763338	hypothetical protein CB1_000606063 [Camelus ferus]	192	116723	17	6	5	3	5.3	5.98	2786	1	0	0	554.277	1106.54	2	1106.54	0.0038	0	41.08	1.4	K	AQYEEIAQR	S			Cmpd 157, AutoMSn(554.2770), 14.3 min
20	gi|528763338	hypothetical protein CB1_000606063 [Camelus ferus]	192	116723	17	6	5	3	5.3	5.98	3087	1	0	0	590.305	1178.59	2	1178.59	0.0016	0	21.63	110	K	YEELQITAGR	Q			Cmpd 273, AutoMSn(590.3046), 17.5 min
20	gi|528763338	hypothetical protein CB1_000606063 [Camelus ferus]	192	116723	17	6	5	3	5.3	5.98	3089	1	0	0	590.307	1178.6	2	1178.59	0.0061	0	51.09	0.13	K	YEELQITAGR	Q			Cmpd 302, AutoMSn(590.3069), 17.6 min
20	gi|528763338	hypothetical protein CB1_000606063 [Camelus ferus]	192	116723	17	6	5	3	5.3	5.98	3373	1	0	0	627.81	1253.61	2	1253.6	0.0058	0	84.05	5.9e-05	R	GFSSGSAVVSGGSR	R			Cmpd 180, AutoMSn(627.8102), 14.8 min
20	gi|528763338	hypothetical protein CB1_000606063 [Camelus ferus]	192	116723	17	6	5	3	5.3	5.98	3517	1	0	0	651.862	1301.71	2	1301.71	0.0016	0	51.26	0.12	R	SLDLDSIIAEVK	A			Cmpd 597, AutoMSn(651.8620), 26.0 min
20	gi|528763338	hypothetical protein CB1_000606063 [Camelus ferus]	192	116723	17	6	5	3	5.3	5.98	3520	1	0	0	651.864	1301.71	2	1301.71	0.0046	0	55.33	0.047	R	SLDLDSIIAEVK	A			Cmpd 416, AutoMSn(651.8635), 25.9 min
20	gi|528763338	hypothetical protein CB1_000606063 [Camelus ferus]	192	116723	17	6	5	3	5.3	5.98	3522	1	0	0	651.864	1301.71	2	1301.71	0.0057	0	68.08	0.0025	R	SLDLDSIIAEVK	A			Cmpd 654, AutoMSn(651.8640), 26.0 min
20	gi|528763338	hypothetical protein CB1_000606063 [Camelus ferus]	192	116723	17	6	5	3	5.3	5.98	3523	1	0	0	651.864	1301.71	2	1301.71	0.0059	0	33	8	R	SLDLDSIIAEVK	A			Cmpd 594, AutoMSn(651.8641), 25.9 min
20	gi|528763338	hypothetical protein CB1_000606063 [Camelus ferus]	192	116723	17	6	5	3	5.3	5.98	3525	1	0	0	651.865	1301.71	2	1301.71	0.0068	0	73.31	0.00074	R	SLDLDSIIAEVK	A			Cmpd 651, AutoMSn(651.8646), 25.9 min
20	gi|528763338	hypothetical protein CB1_000606063 [Camelus ferus]	192	116723	17	6	5	3	5.3	5.98	3528	1	0	0	651.866	1301.72	2	1301.71	0.0092	0	21.91	100	R	SLDLDSIIAEVK	A			Cmpd 658, AutoMSn(651.8658), 25.9 min
20	gi|528763338	hypothetical protein CB1_000606063 [Camelus ferus]	192	116723	17	6	5	3	5.3	5.98	3529	1	0	0	651.866	1301.72	2	1301.71	0.0095	0	38.59	2.2	R	SLDLDSIIAEVK	A			Cmpd 591, AutoMSn(651.8659), 25.8 min
20	gi|528763338	hypothetical protein CB1_000606063 [Camelus ferus]	192	116723	17	6	5	3	5.3	5.98	3531	4	0	0	651.868	1301.72	2	1301.71	0.0137	0	23.39	73	R	SLDLDSIIAEVK	A			Cmpd 648, AutoMSn(651.8680), 25.8 min
20	gi|528763338	hypothetical protein CB1_000606063 [Camelus ferus]	192	116723	17	6	5	3	5.3	5.98	4283	1	0	0	738.398	1474.78	2	1474.78	0.0035	0	70.68	0.0013	R	FLEQQNQVLQTK	W			Cmpd 272, AutoMSn(738.3980), 17.5 min
20	gi|528763338	hypothetical protein CB1_000606063 [Camelus ferus]	192	116723	17	6	5	3	5.3	5.98	4285	1	0	0	738.401	1474.79	2	1474.78	0.009	0	50.71	0.13	R	FLEQQNQVLQTK	W			Cmpd 275, AutoMSn(738.4008), 17.6 min
20	gi|528763338	hypothetical protein CB1_000606063 [Camelus ferus]	192	116723	17	6	5	3	5.3	5.98	4286	1	0	0	738.401	1474.79	2	1474.78	0.0091	0	83.5	6.8e-05	R	FLEQQNQVLQTK	W			Cmpd 301, AutoMSn(738.4008), 17.6 min
20	gi|528763338	hypothetical protein CB1_000606063 [Camelus ferus]	192	116723	17	6	5	3	5.3	5.98	4287	6	0	0	738.401	1474.79	2	1474.78	0.0093	0	16.59	340	R	FLEQQNQVLQTK	W			Cmpd 186, AutoMSn(738.4009), 17.5 min	emPAI	0.15
21	gi|338726100	PREDICTED: keratin, type II cytoskeletal 1 isoform X1 [Equus caballus]	190	64748	20	6	5	3	8.8	7.63	2426	1	0	0	517.262	1032.51	2	1032.51	0	0	40.19	1.8	R	TLLEGEESR	M			Cmpd 115, AutoMSn(517.2616), 14.8 min
21	gi|338726100	PREDICTED: keratin, type II cytoskeletal 1 isoform X1 [Equus caballus]	190	64748	20	6	5	3	8.8	7.63	2427	1	0	0	517.263	1032.51	2	1032.51	0.0031	0	30.45	17	R	TLLEGEESR	M			Cmpd 18, AutoMSn(517.2632), 14.8 min
21	gi|338726100	PREDICTED: keratin, type II cytoskeletal 1 isoform X1 [Equus caballus]	190	64748	20	6	5	3	8.8	7.63	2428	1	0	0	517.263	1032.51	2	1032.51	0.0032	0	59.02	0.024	R	TLLEGEESR	M			Cmpd 181, AutoMSn(517.2632), 14.9 min
21	gi|338726100	PREDICTED: keratin, type II cytoskeletal 1 isoform X1 [Equus caballus]	190	64748	20	6	5	3	8.8	7.63	2429	1	0	0	517.263	1032.51	2	1032.51	0.0034	0	55.38	0.055	R	TLLEGEESR	M			Cmpd 150, AutoMSn(517.2633), 14.8 min
21	gi|338726100	PREDICTED: keratin, type II cytoskeletal 1 isoform X1 [Equus caballus]	190	64748	20	6	5	3	8.8	7.63	2430	1	0	0	517.264	1032.51	2	1032.51	0.0047	0	58.91	0.024	R	TLLEGEESR	M			Cmpd 178, AutoMSn(517.2640), 14.8 min
21	gi|338726100	PREDICTED: keratin, type II cytoskeletal 1 isoform X1 [Equus caballus]	190	64748	20	6	5	3	8.8	7.63	2432	1	0	0	517.265	1032.52	2	1032.51	0.0077	0	33.81	7.8	R	TLLEGEESR	M			Cmpd 157, AutoMSn(517.2655), 14.9 min
21	gi|338726100	PREDICTED: keratin, type II cytoskeletal 1 isoform X1 [Equus caballus]	190	64748	20	6	5	3	8.8	7.63	2433	1	0	0	517.266	1032.52	2	1032.51	0.008	0	21.02	150	R	TLLEGEESR	M			Cmpd 80, AutoMSn(517.2656), 14.8 min
21	gi|338726100	PREDICTED: keratin, type II cytoskeletal 1 isoform X1 [Equus caballus]	190	64748	20	6	5	3	8.8	7.63	2612	1	0	0	533.268	1064.52	2	1064.51	0.0074	0	27.36	31	R	AQYEDIAQK	S			Cmpd 140, AutoMSn(533.2679), 13.9 min
21	gi|338726100	PREDICTED: keratin, type II cytoskeletal 1 isoform X1 [Equus caballus]	190	64748	20	6	5	3	8.8	7.63	2613	1	0	0	533.268	1064.52	2	1064.51	0.0075	0	29.82	17	R	AQYEDIAQK	S			Cmpd 109, AutoMSn(533.2679), 13.8 min
21	gi|338726100	PREDICTED: keratin, type II cytoskeletal 1 isoform X1 [Equus caballus]	190	64748	20	6	5	3	8.8	7.63	2614	1	0	0	533.269	1064.52	2	1064.51	0.0085	0	25.16	51	R	AQYEDIAQK	S			Cmpd 113, AutoMSn(533.2684), 13.9 min
21	gi|338726100	PREDICTED: keratin, type II cytoskeletal 1 isoform X1 [Equus caballus]	190	64748	20	6	5	3	8.8	7.63	2615	4	0	0	533.269	1064.52	2	1064.51	0.0102	0	12.78	870	R	AQYEDIAQK	S			Cmpd 55, AutoMSn(533.2693), 13.9 min
21	gi|338726100	PREDICTED: keratin, type II cytoskeletal 1 isoform X1 [Equus caballus]	190	64748	20	6	5	3	8.8	7.63	3012	3	1	1	580.227	1158.44	2	1158.49	-0.0486	0	11.2	1600	R	YGAGCAGGGFGSR	S			Cmpd 74, AutoMSn(580.2268), 12.7 min
21	gi|338726100	PREDICTED: keratin, type II cytoskeletal 1 isoform X1 [Equus caballus]	190	64748	20	6	5	3	8.8	7.63	4095	1	0	0	465.254	1392.74	3	1392.72	0.0159	1	78.52	0.00022	R	TNAENEFVTIKK	D			Cmpd 198, AutoMSn(465.2542), 15.2 min
21	gi|338726100	PREDICTED: keratin, type II cytoskeletal 1 isoform X1 [Equus caballus]	190	64748	20	6	5	3	8.8	7.63	4096	3	0	0	465.255	1392.74	3	1392.72	0.0176	1	18.04	240	R	TNAENEFVTIKK	D			Cmpd 95, AutoMSn(465.2548), 15.2 min
21	gi|338726100	PREDICTED: keratin, type II cytoskeletal 1 isoform X1 [Equus caballus]	190	64748	20	6	5	3	8.8	7.63	4097	1	0	0	465.255	1392.74	3	1392.72	0.018	1	33.84	6.4	R	TNAENEFVTIKK	D			Cmpd 168, AutoMSn(465.2549), 15.2 min
21	gi|338726100	PREDICTED: keratin, type II cytoskeletal 1 isoform X1 [Equus caballus]	190	64748	20	6	5	3	8.8	7.63	4098	1	0	0	465.256	1392.75	3	1392.72	0.0217	1	30.37	14	R	TNAENEFVTIKK	D			Cmpd 201, AutoMSn(465.2561), 15.3 min
21	gi|338726100	PREDICTED: keratin, type II cytoskeletal 1 isoform X1 [Equus caballus]	190	64748	20	6	5	3	8.8	7.63	4283	1	0	0	738.398	1474.78	2	1474.78	0.0035	0	70.68	0.0013	R	FLEQQNQVLQTK	W			Cmpd 272, AutoMSn(738.3980), 17.5 min
21	gi|338726100	PREDICTED: keratin, type II cytoskeletal 1 isoform X1 [Equus caballus]	190	64748	20	6	5	3	8.8	7.63	4285	1	0	0	738.401	1474.79	2	1474.78	0.009	0	50.71	0.13	R	FLEQQNQVLQTK	W			Cmpd 275, AutoMSn(738.4008), 17.6 min
21	gi|338726100	PREDICTED: keratin, type II cytoskeletal 1 isoform X1 [Equus caballus]	190	64748	20	6	5	3	8.8	7.63	4286	1	0	0	738.401	1474.79	2	1474.78	0.0091	0	83.5	6.8e-05	R	FLEQQNQVLQTK	W			Cmpd 301, AutoMSn(738.4008), 17.6 min
21	gi|338726100	PREDICTED: keratin, type II cytoskeletal 1 isoform X1 [Equus caballus]	190	64748	20	6	5	3	8.8	7.63	4287	6	0	0	738.401	1474.79	2	1474.78	0.0093	0	16.59	340	R	FLEQQNQVLQTK	W			Cmpd 186, AutoMSn(738.4009), 17.5 min	emPAI	0.16
22	gi|537228400	Intermediate filament protein containing protein [Cricetulus griseus]	185	126742	11	4	4	3	3.9	4.64	2470	1	0	0	521.283	1040.55	2	1040.55	0.0018	0	21.41	110	K	VDPEIQNVK	S			Cmpd 186, AutoMSn(521.2833), 14.9 min
22	gi|537228400	Intermediate filament protein containing protein [Cricetulus griseus]	185	126742	11	4	4	3	3.9	4.64	2471	1	0	0	521.287	1040.56	2	1040.55	0.0093	0	21.59	100	K	VDPEIQNVK	S			Cmpd 189, AutoMSn(521.2870), 15.0 min
22	gi|537228400	Intermediate filament protein containing protein [Cricetulus griseus]	185	126742	11	4	4	3	3.9	4.64	3373	1	0	0	627.81	1253.61	2	1253.6	0.0058	0	84.05	5.9e-05	R	GFSSGSAVVSGGSR	R			Cmpd 180, AutoMSn(627.8102), 14.8 min
22	gi|537228400	Intermediate filament protein containing protein [Cricetulus griseus]	185	126742	11	4	4	3	3.9	4.64	4095	1	0	0	465.254	1392.74	3	1392.72	0.0159	1	78.52	0.00022	R	TNAENEFVTIKK	D			Cmpd 198, AutoMSn(465.2542), 15.2 min
22	gi|537228400	Intermediate filament protein containing protein [Cricetulus griseus]	185	126742	11	4	4	3	3.9	4.64	4096	3	0	0	465.255	1392.74	3	1392.72	0.0176	1	18.04	240	R	TNAENEFVTIKK	D			Cmpd 95, AutoMSn(465.2548), 15.2 min
22	gi|537228400	Intermediate filament protein containing protein [Cricetulus griseus]	185	126742	11	4	4	3	3.9	4.64	4097	1	0	0	465.255	1392.74	3	1392.72	0.018	1	33.84	6.4	R	TNAENEFVTIKK	D			Cmpd 168, AutoMSn(465.2549), 15.2 min
22	gi|537228400	Intermediate filament protein containing protein [Cricetulus griseus]	185	126742	11	4	4	3	3.9	4.64	4098	1	0	0	465.256	1392.75	3	1392.72	0.0217	1	30.37	14	R	TNAENEFVTIKK	D			Cmpd 201, AutoMSn(465.2561), 15.3 min
22	gi|537228400	Intermediate filament protein containing protein [Cricetulus griseus]	185	126742	11	4	4	3	3.9	4.64	4283	1	0	0	738.398	1474.78	2	1474.78	0.0035	0	70.68	0.0013	R	FLEQQNQVLQTK	W			Cmpd 272, AutoMSn(738.3980), 17.5 min
22	gi|537228400	Intermediate filament protein containing protein [Cricetulus griseus]	185	126742	11	4	4	3	3.9	4.64	4285	1	0	0	738.401	1474.79	2	1474.78	0.009	0	50.71	0.13	R	FLEQQNQVLQTK	W			Cmpd 275, AutoMSn(738.4008), 17.6 min
22	gi|537228400	Intermediate filament protein containing protein [Cricetulus griseus]	185	126742	11	4	4	3	3.9	4.64	4286	1	0	0	738.401	1474.79	2	1474.78	0.0091	0	83.5	6.8e-05	R	FLEQQNQVLQTK	W			Cmpd 301, AutoMSn(738.4008), 17.6 min
22	gi|537228400	Intermediate filament protein containing protein [Cricetulus griseus]	185	126742	11	4	4	3	3.9	4.64	4287	6	0	0	738.401	1474.79	2	1474.78	0.0093	0	16.59	340	R	FLEQQNQVLQTK	W			Cmpd 186, AutoMSn(738.4009), 17.5 min	emPAI	0.08
23	gi|478509715	PREDICTED: keratin, type II cytoskeletal 1 [Ceratotherium simum simum]	180	64061	19	6	6	3	8.8	8.15	2017	1	0	0	437.754	873.494	2	873.492	0.002	0	39.78	2.2	R	SLVNLGGSK	S			Cmpd 214, AutoMSn(437.7543), 16.2 min
23	gi|478509715	PREDICTED: keratin, type II cytoskeletal 1 [Ceratotherium simum simum]	180	64061	19	6	6	3	8.8	8.15	2018	1	0	0	437.754	873.494	2	873.492	0.0022	0	34.71	7.1	R	SLVNLGGSK	S			Cmpd 242, AutoMSn(437.7544), 16.2 min
23	gi|478509715	PREDICTED: keratin, type II cytoskeletal 1 [Ceratotherium simum simum]	180	64061	19	6	6	3	8.8	8.15	2785	1	0	0	554.276	1106.54	2	1106.54	0.0022	0	27.05	35	K	AQYEEIAQR	S			Cmpd 131, AutoMSn(554.2762), 14.3 min
23	gi|478509715	PREDICTED: keratin, type II cytoskeletal 1 [Ceratotherium simum simum]	180	64061	19	6	6	3	8.8	8.15	2786	1	0	0	554.277	1106.54	2	1106.54	0.0038	0	41.08	1.4	K	AQYEEIAQR	S			Cmpd 157, AutoMSn(554.2770), 14.3 min
23	gi|478509715	PREDICTED: keratin, type II cytoskeletal 1 [Ceratotherium simum simum]	180	64061	19	6	6	3	8.8	8.15	4095	1	0	0	465.254	1392.74	3	1392.72	0.0159	1	78.52	0.00022	R	TNAENEFVTIKK	D			Cmpd 198, AutoMSn(465.2542), 15.2 min
23	gi|478509715	PREDICTED: keratin, type II cytoskeletal 1 [Ceratotherium simum simum]	180	64061	19	6	6	3	8.8	8.15	4096	3	0	0	465.255	1392.74	3	1392.72	0.0176	1	18.04	240	R	TNAENEFVTIKK	D			Cmpd 95, AutoMSn(465.2548), 15.2 min
23	gi|478509715	PREDICTED: keratin, type II cytoskeletal 1 [Ceratotherium simum simum]	180	64061	19	6	6	3	8.8	8.15	4097	1	0	0	465.255	1392.74	3	1392.72	0.018	1	33.84	6.4	R	TNAENEFVTIKK	D			Cmpd 168, AutoMSn(465.2549), 15.2 min
23	gi|478509715	PREDICTED: keratin, type II cytoskeletal 1 [Ceratotherium simum simum]	180	64061	19	6	6	3	8.8	8.15	4098	1	0	0	465.256	1392.75	3	1392.72	0.0217	1	30.37	14	R	TNAENEFVTIKK	D			Cmpd 201, AutoMSn(465.2561), 15.3 min
23	gi|478509715	PREDICTED: keratin, type II cytoskeletal 1 [Ceratotherium simum simum]	180	64061	19	6	6	3	8.8	8.15	4274	2	0	0	738.374	1474.73	2	1474.74	-0.0076	0	19.35	170	K	WELLQQVDTSTR	T			Cmpd 297, AutoMSn(738.3743), 21.6 min
23	gi|478509715	PREDICTED: keratin, type II cytoskeletal 1 [Ceratotherium simum simum]	180	64061	19	6	6	3	8.8	8.15	4276	1	0	0	738.378	1474.74	2	1474.74	0.0004	0	57.41	0.027	K	WELLQQVDTSTR	T			Cmpd 450, AutoMSn(738.3783), 21.6 min
23	gi|478509715	PREDICTED: keratin, type II cytoskeletal 1 [Ceratotherium simum simum]	180	64061	19	6	6	3	8.8	8.15	4277	1	0	0	738.381	1474.75	2	1474.74	0.0063	0	53.21	0.072	K	WELLQQVDTSTR	T			Cmpd 484, AutoMSn(738.3812), 21.7 min
23	gi|478509715	PREDICTED: keratin, type II cytoskeletal 1 [Ceratotherium simum simum]	180	64061	19	6	6	3	8.8	8.15	4279	1	0	0	738.383	1474.75	2	1474.74	0.0088	0	58.7	0.02	K	WELLQQVDTSTR	T			Cmpd 447, AutoMSn(738.3825), 21.5 min
23	gi|478509715	PREDICTED: keratin, type II cytoskeletal 1 [Ceratotherium simum simum]	180	64061	19	6	6	3	8.8	8.15	4280	1	0	0	738.384	1474.75	2	1474.74	0.0119	0	65.08	0.0047	K	WELLQQVDTSTR	T			Cmpd 481, AutoMSn(738.3840), 21.6 min
23	gi|478509715	PREDICTED: keratin, type II cytoskeletal 1 [Ceratotherium simum simum]	180	64061	19	6	6	3	8.8	8.15	4281	1	0	0	738.384	1474.75	2	1474.74	0.0123	0	32.24	9	K	WELLQQVDTSTR	T			Cmpd 478, AutoMSn(738.3842), 21.5 min
23	gi|478509715	PREDICTED: keratin, type II cytoskeletal 1 [Ceratotherium simum simum]	180	64061	19	6	6	3	8.8	8.15	4283	1	0	0	738.398	1474.78	2	1474.78	0.0035	0	70.68	0.0013	R	FLEQQNQVLQTK	W			Cmpd 272, AutoMSn(738.3980), 17.5 min
23	gi|478509715	PREDICTED: keratin, type II cytoskeletal 1 [Ceratotherium simum simum]	180	64061	19	6	6	3	8.8	8.15	4285	1	0	0	738.401	1474.79	2	1474.78	0.009	0	50.71	0.13	R	FLEQQNQVLQTK	W			Cmpd 275, AutoMSn(738.4008), 17.6 min
23	gi|478509715	PREDICTED: keratin, type II cytoskeletal 1 [Ceratotherium simum simum]	180	64061	19	6	6	3	8.8	8.15	4286	1	0	0	738.401	1474.79	2	1474.78	0.0091	0	83.5	6.8e-05	R	FLEQQNQVLQTK	W			Cmpd 301, AutoMSn(738.4008), 17.6 min
23	gi|478509715	PREDICTED: keratin, type II cytoskeletal 1 [Ceratotherium simum simum]	180	64061	19	6	6	3	8.8	8.15	4287	6	0	0	738.401	1474.79	2	1474.78	0.0093	0	16.59	340	R	FLEQQNQVLQTK	W			Cmpd 186, AutoMSn(738.4009), 17.5 min
23	gi|478509715	PREDICTED: keratin, type II cytoskeletal 1 [Ceratotherium simum simum]	180	64061	19	6	6	3	8.8	8.15	6556	1	0	0	978.182	2931.52	3	2931.51	0.0153	1	32.94	5.1	R	FLEQQNQVLQTKWELLQQVDTSTR	T			Cmpd 557, AutoMSn(978.1820), 23.4 min	emPAI	0.28
24	gi|348581121	PREDICTED: keratin, type II cytoskeletal 1 [Cavia porcellus]	179	63766	16	6	4	3	7.3	7.03	2017	1	0	0	437.754	873.494	2	873.492	0.002	0	39.78	2.2	R	SLVNLGGSK	S			Cmpd 214, AutoMSn(437.7543), 16.2 min
24	gi|348581121	PREDICTED: keratin, type II cytoskeletal 1 [Cavia porcellus]	179	63766	16	6	4	3	7.3	7.03	2018	1	0	0	437.754	873.494	2	873.492	0.0022	0	34.71	7.1	R	SLVNLGGSK	S			Cmpd 242, AutoMSn(437.7544), 16.2 min
24	gi|348581121	PREDICTED: keratin, type II cytoskeletal 1 [Cavia porcellus]	179	63766	16	6	4	3	7.3	7.03	4095	1	0	0	465.254	1392.74	3	1392.72	0.0159	1	78.52	0.00022	R	TNAENEFVTIKK	D			Cmpd 198, AutoMSn(465.2542), 15.2 min
24	gi|348581121	PREDICTED: keratin, type II cytoskeletal 1 [Cavia porcellus]	179	63766	16	6	4	3	7.3	7.03	4096	3	0	0	465.255	1392.74	3	1392.72	0.0176	1	18.04	240	R	TNAENEFVTIKK	D			Cmpd 95, AutoMSn(465.2548), 15.2 min
24	gi|348581121	PREDICTED: keratin, type II cytoskeletal 1 [Cavia porcellus]	179	63766	16	6	4	3	7.3	7.03	4097	1	0	0	465.255	1392.74	3	1392.72	0.018	1	33.84	6.4	R	TNAENEFVTIKK	D			Cmpd 168, AutoMSn(465.2549), 15.2 min
24	gi|348581121	PREDICTED: keratin, type II cytoskeletal 1 [Cavia porcellus]	179	63766	16	6	4	3	7.3	7.03	4098	1	0	0	465.256	1392.75	3	1392.72	0.0217	1	30.37	14	R	TNAENEFVTIKK	D			Cmpd 201, AutoMSn(465.2561), 15.3 min
24	gi|348581121	PREDICTED: keratin, type II cytoskeletal 1 [Cavia porcellus]	179	63766	16	6	4	3	7.3	7.03	4274	2	0	0	738.374	1474.73	2	1474.74	-0.0076	0	19.35	170	K	WELLQQVDTSTR	T			Cmpd 297, AutoMSn(738.3743), 21.6 min
24	gi|348581121	PREDICTED: keratin, type II cytoskeletal 1 [Cavia porcellus]	179	63766	16	6	4	3	7.3	7.03	4276	1	0	0	738.378	1474.74	2	1474.74	0.0004	0	57.41	0.027	K	WELLQQVDTSTR	T			Cmpd 450, AutoMSn(738.3783), 21.6 min
24	gi|348581121	PREDICTED: keratin, type II cytoskeletal 1 [Cavia porcellus]	179	63766	16	6	4	3	7.3	7.03	4277	1	0	0	738.381	1474.75	2	1474.74	0.0063	0	53.21	0.072	K	WELLQQVDTSTR	T			Cmpd 484, AutoMSn(738.3812), 21.7 min
24	gi|348581121	PREDICTED: keratin, type II cytoskeletal 1 [Cavia porcellus]	179	63766	16	6	4	3	7.3	7.03	4279	1	0	0	738.383	1474.75	2	1474.74	0.0088	0	58.7	0.02	K	WELLQQVDTSTR	T			Cmpd 447, AutoMSn(738.3825), 21.5 min
24	gi|348581121	PREDICTED: keratin, type II cytoskeletal 1 [Cavia porcellus]	179	63766	16	6	4	3	7.3	7.03	4280	1	0	0	738.384	1474.75	2	1474.74	0.0119	0	65.08	0.0047	K	WELLQQVDTSTR	T			Cmpd 481, AutoMSn(738.3840), 21.6 min
24	gi|348581121	PREDICTED: keratin, type II cytoskeletal 1 [Cavia porcellus]	179	63766	16	6	4	3	7.3	7.03	4281	1	0	0	738.384	1474.75	2	1474.74	0.0123	0	32.24	9	K	WELLQQVDTSTR	T			Cmpd 478, AutoMSn(738.3842), 21.5 min
24	gi|348581121	PREDICTED: keratin, type II cytoskeletal 1 [Cavia porcellus]	179	63766	16	6	4	3	7.3	7.03	4283	1	0	0	738.398	1474.78	2	1474.81	-0.0328	1	70.68	0.0013	R	FLEQQNQVLKTK	W			Cmpd 272, AutoMSn(738.3980), 17.5 min
24	gi|348581121	PREDICTED: keratin, type II cytoskeletal 1 [Cavia porcellus]	179	63766	16	6	4	3	7.3	7.03	4285	1	0	0	738.401	1474.79	2	1474.81	-0.0273	1	50.71	0.13	R	FLEQQNQVLKTK	W			Cmpd 275, AutoMSn(738.4008), 17.6 min
24	gi|348581121	PREDICTED: keratin, type II cytoskeletal 1 [Cavia porcellus]	179	63766	16	6	4	3	7.3	7.03	4286	1	0	0	738.401	1474.79	2	1474.81	-0.0273	1	83.5	6.8e-05	R	FLEQQNQVLKTK	W			Cmpd 301, AutoMSn(738.4008), 17.6 min
24	gi|348581121	PREDICTED: keratin, type II cytoskeletal 1 [Cavia porcellus]	179	63766	16	6	4	3	7.3	7.03	4287	6	0	0	738.401	1474.79	2	1474.81	-0.027	1	16.59	340	R	FLEQQNQVLKTK	W			Cmpd 186, AutoMSn(738.4009), 17.5 min	emPAI	0.22
25	gi|538259829	P-III metalloprotease, partial [Protobothrops flavoviridis]	172	28321	8	3	2	1	10.3	7.7	1096	1	0	0	649.386	648.379	1	648.385	-0.0057	0	9.5	2200	R	EFLIK	N			Cmpd 298, AutoMSn(649.3862), 17.5 min
25	gi|538259829	P-III metalloprotease, partial [Protobothrops flavoviridis]	172	28321	8	3	2	1	10.3	7.7	1097	1	0	0	649.389	648.381	1	648.385	-0.0034	0	9.4	2300	R	EFLIK	N			Cmpd 295, AutoMSn(649.3885), 17.4 min
25	gi|538259829	P-III metalloprotease, partial [Protobothrops flavoviridis]	172	28321	8	3	2	1	10.3	7.7	6224	1	0	0	1185.99	2369.97	2	2369.97	-0.0033	0	21.35	110	K	ACVMAGTLSCDASYLFSDCSR	Q	3 Carbamidomethyl (C)	0.010000000100000000100.0	Cmpd 584, AutoMSn(1185.9931), 24.0 min
25	gi|538259829	P-III metalloprotease, partial [Protobothrops flavoviridis]	172	28321	8	3	2	1	10.3	7.7	6226	1	0	0	791.006	2370	3	2369.97	0.0216	0	66.47	0.0031	K	ACVMAGTLSCDASYLFSDCSR	Q	3 Carbamidomethyl (C)	0.010000000100000000100.0	Cmpd 585, AutoMSn(791.0061), 24.1 min
25	gi|538259829	P-III metalloprotease, partial [Protobothrops flavoviridis]	172	28321	8	3	2	1	10.3	7.7	6227	1	0	0	791.008	2370	3	2369.97	0.0264	0	73.83	0.00057	K	ACVMAGTLSCDASYLFSDCSR	Q	3 Carbamidomethyl (C)	0.010000000100000000100.0	Cmpd 582, AutoMSn(791.0077), 24.0 min
25	gi|538259829	P-III metalloprotease, partial [Protobothrops flavoviridis]	172	28321	8	3	2	1	10.3	7.7	6228	1	0	0	791.015	2370.02	3	2369.97	0.0479	0	71.03	0.001	K	ACVMAGTLSCDASYLFSDCSR	Q	3 Carbamidomethyl (C)	0.010000000100000000100.0	Cmpd 580, AutoMSn(791.0149), 23.9 min
25	gi|538259829	P-III metalloprotease, partial [Protobothrops flavoviridis]	172	28321	8	3	2	1	10.3	7.7	6251	1	0	0	796.338	2385.99	3	2385.97	0.0222	0	52.81	0.074	K	ACVMAGTLSCDASYLFSDCSR	Q	3 Carbamidomethyl (C); Oxidation (M)	0.010200000100000000100.0	Cmpd 524, AutoMSn(796.3379), 22.6 min
25	gi|538259829	P-III metalloprotease, partial [Protobothrops flavoviridis]	172	28321	8	3	2	1	10.3	7.7	6252	1	0	0	796.34	2386	3	2385.97	0.0289	0	51.37	0.1	K	ACVMAGTLSCDASYLFSDCSR	Q	3 Carbamidomethyl (C); Oxidation (M)	0.010200000100000000100.0	Cmpd 523, AutoMSn(796.3402), 22.5 min	emPAI	0.25
26	gi|181402	epidermal cytokeratin 2 [Homo sapiens]	165	65825	14	3	7	2	11.9	8.07	1854	1	0	0	416.252	830.489	2	830.486	0.0025	0	30.27	20	R	SLVGLGGTK	S			Cmpd 239, AutoMSn(416.2516), 16.2 min
26	gi|181402	epidermal cytokeratin 2 [Homo sapiens]	165	65825	14	3	7	2	11.9	8.07	2470	1	0	0	521.283	1040.55	2	1040.55	0.0018	0	21.41	110	K	VDPEIQNVK	A			Cmpd 186, AutoMSn(521.2833), 14.9 min
26	gi|181402	epidermal cytokeratin 2 [Homo sapiens]	165	65825	14	3	7	2	11.9	8.07	2471	1	0	0	521.287	1040.56	2	1040.55	0.0093	0	21.59	100	K	VDPEIQNVK	A			Cmpd 189, AutoMSn(521.2870), 15.0 min
26	gi|181402	epidermal cytokeratin 2 [Homo sapiens]	165	65825	14	3	7	2	11.9	8.07	2785	1	0	0	554.276	1106.54	2	1106.54	0.0022	0	27.05	35	K	AQYEEIAQR	S			Cmpd 131, AutoMSn(554.2762), 14.3 min
26	gi|181402	epidermal cytokeratin 2 [Homo sapiens]	165	65825	14	3	7	2	11.9	8.07	2786	1	0	0	554.277	1106.54	2	1106.54	0.0038	0	41.08	1.4	K	AQYEEIAQR	S			Cmpd 157, AutoMSn(554.2770), 14.3 min
26	gi|181402	epidermal cytokeratin 2 [Homo sapiens]	165	65825	14	3	7	2	11.9	8.07	3373	1	0	0	627.81	1253.61	2	1253.6	0.0058	0	84.05	5.9e-05	R	GFSSGSAVVSGGSR	R			Cmpd 180, AutoMSn(627.8102), 14.8 min
26	gi|181402	epidermal cytokeratin 2 [Homo sapiens]	165	65825	14	3	7	2	11.9	8.07	3709	1	0	0	665.368	1328.72	2	1328.72	0.0021	0	46.62	0.36	R	NLDLDSIIAEVK	A			Cmpd 652, AutoMSn(665.3677), 25.9 min
26	gi|181402	epidermal cytokeratin 2 [Homo sapiens]	165	65825	14	3	7	2	11.9	8.07	3710	1	0	0	665.37	1328.73	2	1328.72	0.0068	0	46.17	0.4	R	NLDLDSIIAEVK	A			Cmpd 656, AutoMSn(665.3700), 26.0 min
26	gi|181402	epidermal cytokeratin 2 [Homo sapiens]	165	65825	14	3	7	2	11.9	8.07	4238	1	1	0	730.906	1459.8	2	1459.79	0.0055	0	40.57	1.4	K	VDLLNQEIEFLK	V			Cmpd 627, AutoMSn(730.9061), 25.3 min
26	gi|181402	epidermal cytokeratin 2 [Homo sapiens]	165	65825	14	3	7	2	11.9	8.07	4239	1	1	0	730.907	1459.8	2	1459.79	0.0063	0	21.6	110	K	VDLLNQEIEFLK	V			Cmpd 624, AutoMSn(730.9065), 25.2 min
26	gi|181402	epidermal cytokeratin 2 [Homo sapiens]	165	65825	14	3	7	2	11.9	8.07	4283	1	0	0	738.398	1474.78	2	1474.78	0.0035	0	70.68	0.0013	R	FLEQQNQVLQTK	W			Cmpd 272, AutoMSn(738.3980), 17.5 min
26	gi|181402	epidermal cytokeratin 2 [Homo sapiens]	165	65825	14	3	7	2	11.9	8.07	4285	1	0	0	738.401	1474.79	2	1474.78	0.009	0	50.71	0.13	R	FLEQQNQVLQTK	W			Cmpd 275, AutoMSn(738.4008), 17.6 min
26	gi|181402	epidermal cytokeratin 2 [Homo sapiens]	165	65825	14	3	7	2	11.9	8.07	4286	1	0	0	738.401	1474.79	2	1474.78	0.0091	0	83.5	6.8e-05	R	FLEQQNQVLQTK	W			Cmpd 301, AutoMSn(738.4008), 17.6 min
26	gi|181402	epidermal cytokeratin 2 [Homo sapiens]	165	65825	14	3	7	2	11.9	8.07	4287	6	0	0	738.401	1474.79	2	1474.78	0.0093	0	16.59	340	R	FLEQQNQVLQTK	W			Cmpd 186, AutoMSn(738.4009), 17.5 min	emPAI	0.28
27	gi|403296723	PREDICTED: keratin, type II cytoskeletal 2 epidermal [Saimiri boliviensis boliviensis]	157	65925	18	5	5	2	8.4	8.35	2470	1	0	0	521.283	1040.55	2	1040.55	0.0018	0	21.41	110	K	VDPEIQNVK	A			Cmpd 186, AutoMSn(521.2833), 14.9 min
27	gi|403296723	PREDICTED: keratin, type II cytoskeletal 2 epidermal [Saimiri boliviensis boliviensis]	157	65925	18	5	5	2	8.4	8.35	2471	1	0	0	521.287	1040.56	2	1040.55	0.0093	0	21.59	100	K	VDPEIQNVK	A			Cmpd 189, AutoMSn(521.2870), 15.0 min
27	gi|403296723	PREDICTED: keratin, type II cytoskeletal 2 epidermal [Saimiri boliviensis boliviensis]	157	65925	18	5	5	2	8.4	8.35	2785	1	0	0	554.276	1106.54	2	1106.54	0.0022	0	27.05	35	K	AQYEEIAQR	S			Cmpd 131, AutoMSn(554.2762), 14.3 min
27	gi|403296723	PREDICTED: keratin, type II cytoskeletal 2 epidermal [Saimiri boliviensis boliviensis]	157	65925	18	5	5	2	8.4	8.35	2786	1	0	0	554.277	1106.54	2	1106.54	0.0038	0	41.08	1.4	K	AQYEEIAQR	S			Cmpd 157, AutoMSn(554.2770), 14.3 min
27	gi|403296723	PREDICTED: keratin, type II cytoskeletal 2 epidermal [Saimiri boliviensis boliviensis]	157	65925	18	5	5	2	8.4	8.35	3517	1	0	0	651.862	1301.71	2	1301.71	0.0016	0	51.26	0.12	R	SLDLDSIIAEVK	A			Cmpd 597, AutoMSn(651.8620), 26.0 min
27	gi|403296723	PREDICTED: keratin, type II cytoskeletal 2 epidermal [Saimiri boliviensis boliviensis]	157	65925	18	5	5	2	8.4	8.35	3520	1	0	0	651.864	1301.71	2	1301.71	0.0046	0	55.33	0.047	R	SLDLDSIIAEVK	A			Cmpd 416, AutoMSn(651.8635), 25.9 min
27	gi|403296723	PREDICTED: keratin, type II cytoskeletal 2 epidermal [Saimiri boliviensis boliviensis]	157	65925	18	5	5	2	8.4	8.35	3522	1	0	0	651.864	1301.71	2	1301.71	0.0057	0	68.08	0.0025	R	SLDLDSIIAEVK	A			Cmpd 654, AutoMSn(651.8640), 26.0 min
27	gi|403296723	PREDICTED: keratin, type II cytoskeletal 2 epidermal [Saimiri boliviensis boliviensis]	157	65925	18	5	5	2	8.4	8.35	3523	1	0	0	651.864	1301.71	2	1301.71	0.0059	0	33	8	R	SLDLDSIIAEVK	A			Cmpd 594, AutoMSn(651.8641), 25.9 min
27	gi|403296723	PREDICTED: keratin, type II cytoskeletal 2 epidermal [Saimiri boliviensis boliviensis]	157	65925	18	5	5	2	8.4	8.35	3525	1	0	0	651.865	1301.71	2	1301.71	0.0068	0	73.31	0.00074	R	SLDLDSIIAEVK	A			Cmpd 651, AutoMSn(651.8646), 25.9 min
27	gi|403296723	PREDICTED: keratin, type II cytoskeletal 2 epidermal [Saimiri boliviensis boliviensis]	157	65925	18	5	5	2	8.4	8.35	3528	1	0	0	651.866	1301.72	2	1301.71	0.0092	0	21.91	100	R	SLDLDSIIAEVK	A			Cmpd 658, AutoMSn(651.8658), 25.9 min
27	gi|403296723	PREDICTED: keratin, type II cytoskeletal 2 epidermal [Saimiri boliviensis boliviensis]	157	65925	18	5	5	2	8.4	8.35	3529	1	0	0	651.866	1301.72	2	1301.71	0.0095	0	38.59	2.2	R	SLDLDSIIAEVK	A			Cmpd 591, AutoMSn(651.8659), 25.8 min
27	gi|403296723	PREDICTED: keratin, type II cytoskeletal 2 epidermal [Saimiri boliviensis boliviensis]	157	65925	18	5	5	2	8.4	8.35	3531	4	0	0	651.868	1301.72	2	1301.71	0.0137	0	23.39	73	R	SLDLDSIIAEVK	A			Cmpd 648, AutoMSn(651.8680), 25.8 min
27	gi|403296723	PREDICTED: keratin, type II cytoskeletal 2 epidermal [Saimiri boliviensis boliviensis]	157	65925	18	5	5	2	8.4	8.35	4238	1	0	0	730.906	1459.8	2	1459.79	0.0055	0	40.57	1.4	K	VDLLNQEIEFLK	V			Cmpd 627, AutoMSn(730.9061), 25.3 min
27	gi|403296723	PREDICTED: keratin, type II cytoskeletal 2 epidermal [Saimiri boliviensis boliviensis]	157	65925	18	5	5	2	8.4	8.35	4239	1	0	0	730.907	1459.8	2	1459.79	0.0063	0	21.6	110	K	VDLLNQEIEFLK	V			Cmpd 624, AutoMSn(730.9065), 25.2 min
27	gi|403296723	PREDICTED: keratin, type II cytoskeletal 2 epidermal [Saimiri boliviensis boliviensis]	157	65925	18	5	5	2	8.4	8.35	4283	1	0	0	738.398	1474.78	2	1474.78	0.0035	0	70.68	0.0013	R	FLEQQNQVLQTK	W			Cmpd 272, AutoMSn(738.3980), 17.5 min
27	gi|403296723	PREDICTED: keratin, type II cytoskeletal 2 epidermal [Saimiri boliviensis boliviensis]	157	65925	18	5	5	2	8.4	8.35	4285	1	0	0	738.401	1474.79	2	1474.78	0.009	0	50.71	0.13	R	FLEQQNQVLQTK	W			Cmpd 275, AutoMSn(738.4008), 17.6 min
27	gi|403296723	PREDICTED: keratin, type II cytoskeletal 2 epidermal [Saimiri boliviensis boliviensis]	157	65925	18	5	5	2	8.4	8.35	4286	1	0	0	738.401	1474.79	2	1474.78	0.0091	0	83.5	6.8e-05	R	FLEQQNQVLQTK	W			Cmpd 301, AutoMSn(738.4008), 17.6 min
27	gi|403296723	PREDICTED: keratin, type II cytoskeletal 2 epidermal [Saimiri boliviensis boliviensis]	157	65925	18	5	5	2	8.4	8.35	4287	6	0	0	738.401	1474.79	2	1474.78	0.0093	0	16.59	340	R	FLEQQNQVLQTK	W			Cmpd 186, AutoMSn(738.4009), 17.5 min	emPAI	0.21
28	gi|560961277	PREDICTED: LOW QUALITY PROTEIN: keratin, type II cytoskeletal 1 [Vicugna pacos]	156	62717	14	5	3	2	5.7	8.45	3087	1	0	0	590.305	1178.59	2	1178.59	0.0016	0	21.63	110	K	YEELQLTAGR	Q			Cmpd 273, AutoMSn(590.3046), 17.5 min
28	gi|560961277	PREDICTED: LOW QUALITY PROTEIN: keratin, type II cytoskeletal 1 [Vicugna pacos]	156	62717	14	5	3	2	5.7	8.45	3089	1	0	0	590.307	1178.6	2	1178.59	0.0061	0	51.09	0.13	K	YEELQLTAGR	Q			Cmpd 302, AutoMSn(590.3069), 17.6 min
28	gi|560961277	PREDICTED: LOW QUALITY PROTEIN: keratin, type II cytoskeletal 1 [Vicugna pacos]	156	62717	14	5	3	2	5.7	8.45	3517	1	0	0	651.862	1301.71	2	1301.71	0.0016	0	51.26	0.12	R	SLDLDSIIAEVK	A			Cmpd 597, AutoMSn(651.8620), 26.0 min
28	gi|560961277	PREDICTED: LOW QUALITY PROTEIN: keratin, type II cytoskeletal 1 [Vicugna pacos]	156	62717	14	5	3	2	5.7	8.45	3520	1	0	0	651.864	1301.71	2	1301.71	0.0046	0	55.33	0.047	R	SLDLDSIIAEVK	A			Cmpd 416, AutoMSn(651.8635), 25.9 min
28	gi|560961277	PREDICTED: LOW QUALITY PROTEIN: keratin, type II cytoskeletal 1 [Vicugna pacos]	156	62717	14	5	3	2	5.7	8.45	3522	1	0	0	651.864	1301.71	2	1301.71	0.0057	0	68.08	0.0025	R	SLDLDSIIAEVK	A			Cmpd 654, AutoMSn(651.8640), 26.0 min
28	gi|560961277	PREDICTED: LOW QUALITY PROTEIN: keratin, type II cytoskeletal 1 [Vicugna pacos]	156	62717	14	5	3	2	5.7	8.45	3523	1	0	0	651.864	1301.71	2	1301.71	0.0059	0	33	8	R	SLDLDSIIAEVK	A			Cmpd 594, AutoMSn(651.8641), 25.9 min
28	gi|560961277	PREDICTED: LOW QUALITY PROTEIN: keratin, type II cytoskeletal 1 [Vicugna pacos]	156	62717	14	5	3	2	5.7	8.45	3525	1	0	0	651.865	1301.71	2	1301.71	0.0068	0	73.31	0.00074	R	SLDLDSIIAEVK	A			Cmpd 651, AutoMSn(651.8646), 25.9 min
28	gi|560961277	PREDICTED: LOW QUALITY PROTEIN: keratin, type II cytoskeletal 1 [Vicugna pacos]	156	62717	14	5	3	2	5.7	8.45	3528	1	0	0	651.866	1301.72	2	1301.71	0.0092	0	21.91	100	R	SLDLDSIIAEVK	A			Cmpd 658, AutoMSn(651.8658), 25.9 min
28	gi|560961277	PREDICTED: LOW QUALITY PROTEIN: keratin, type II cytoskeletal 1 [Vicugna pacos]	156	62717	14	5	3	2	5.7	8.45	3529	1	0	0	651.866	1301.72	2	1301.71	0.0095	0	38.59	2.2	R	SLDLDSIIAEVK	A			Cmpd 591, AutoMSn(651.8659), 25.8 min
28	gi|560961277	PREDICTED: LOW QUALITY PROTEIN: keratin, type II cytoskeletal 1 [Vicugna pacos]	156	62717	14	5	3	2	5.7	8.45	3531	4	0	0	651.868	1301.72	2	1301.71	0.0137	0	23.39	73	R	SLDLDSIIAEVK	A			Cmpd 648, AutoMSn(651.8680), 25.8 min
28	gi|560961277	PREDICTED: LOW QUALITY PROTEIN: keratin, type II cytoskeletal 1 [Vicugna pacos]	156	62717	14	5	3	2	5.7	8.45	4283	1	0	0	738.398	1474.78	2	1474.78	0.0035	0	70.68	0.0013	R	FLEQQNQVLQTK	W			Cmpd 272, AutoMSn(738.3980), 17.5 min
28	gi|560961277	PREDICTED: LOW QUALITY PROTEIN: keratin, type II cytoskeletal 1 [Vicugna pacos]	156	62717	14	5	3	2	5.7	8.45	4285	1	0	0	738.401	1474.79	2	1474.78	0.009	0	50.71	0.13	R	FLEQQNQVLQTK	W			Cmpd 275, AutoMSn(738.4008), 17.6 min
28	gi|560961277	PREDICTED: LOW QUALITY PROTEIN: keratin, type II cytoskeletal 1 [Vicugna pacos]	156	62717	14	5	3	2	5.7	8.45	4286	1	0	0	738.401	1474.79	2	1474.78	0.0091	0	83.5	6.8e-05	R	FLEQQNQVLQTK	W			Cmpd 301, AutoMSn(738.4008), 17.6 min
28	gi|560961277	PREDICTED: LOW QUALITY PROTEIN: keratin, type II cytoskeletal 1 [Vicugna pacos]	156	62717	14	5	3	2	5.7	8.45	4287	6	0	0	738.401	1474.79	2	1474.78	0.0093	0	16.59	340	R	FLEQQNQVLQTK	W			Cmpd 186, AutoMSn(738.4009), 17.5 min	emPAI	0.17
29	gi|3552036	pallase [Gloydius halys]	151	26162	8	4	3	2	19.4	5.89	2807	1	1	0	559.803	1117.59	2	1117.58	0.0113	0	54.06	0.069	R	TLCAGILEGGK	D	Carbamidomethyl (C)	0.00100000000.0	Cmpd 319, AutoMSn(559.8030), 18.1 min
29	gi|3552036	pallase [Gloydius halys]	151	26162	8	4	3	2	19.4	5.89	4365	1	1	0	756.852	1511.69	2	1511.68	0.0117	0	60.34	0.013	M	VIGGDECNINEHR	F	Carbamidomethyl (C)	0.0000001000000.0	Cmpd 88, AutoMSn(756.8524), 13.4 min
29	gi|3552036	pallase [Gloydius halys]	151	26162	8	4	3	2	19.4	5.89	4366	2	1	0	504.904	1511.69	3	1511.68	0.0127	0	21.12	110	M	VIGGDECNINEHR	F	Carbamidomethyl (C)	0.0000001000000.0	Cmpd 97, AutoMSn(504.9044), 13.0 min
29	gi|3552036	pallase [Gloydius halys]	151	26162	8	4	3	2	19.4	5.89	4367	1	1	0	504.906	1511.7	3	1511.68	0.0168	0	84.65	4.8e-05	M	VIGGDECNINEHR	F	Carbamidomethyl (C)	0.0000001000000.0	Cmpd 87, AutoMSn(504.9058), 13.4 min
29	gi|3552036	pallase [Gloydius halys]	151	26162	8	4	3	2	19.4	5.89	4368	1	1	0	504.906	1511.7	3	1511.68	0.0179	0	27.12	27	M	VIGGDECNINEHR	F	Carbamidomethyl (C)	0.0000001000000.0	Cmpd 91, AutoMSn(504.9061), 13.4 min
29	gi|3552036	pallase [Gloydius halys]	151	26162	8	4	3	2	19.4	5.89	6045	1	1	1	745.058	2232.15	3	2232.13	0.0194	0	68.67	0.0016	K	NSAHIAPLSLPSSPPSVGSVCR	T	Carbamidomethyl (C)	0.0000000000000000000010.0	Cmpd 417, AutoMSn(745.0578), 20.2 min
29	gi|3552036	pallase [Gloydius halys]	151	26162	8	4	3	2	19.4	5.89	6046	1	1	1	745.058	2232.15	3	2232.13	0.021	0	44.64	0.4	K	NSAHIAPLSLPSSPPSVGSVCR	T	Carbamidomethyl (C)	0.0000000000000000000010.0	Cmpd 414, AutoMSn(745.0583), 20.1 min
29	gi|3552036	pallase [Gloydius halys]	151	26162	8	4	3	2	19.4	5.89	6047	1	1	1	745.062	2232.16	3	2232.13	0.0327	0	53.84	0.049	K	NSAHIAPLSLPSSPPSVGSVCR	T	Carbamidomethyl (C)	0.0000000000000000000010.0	Cmpd 420, AutoMSn(745.0622), 20.2 min	emPAI	0.62
30	gi|395835411	PREDICTED: keratin, type II cytoskeletal 1 [Otolemur garnettii]	150	66504	10	3	3	2	5.1	6.65	2017	1	0	0	437.754	873.494	2	873.492	0.002	0	39.78	2.2	R	SLVNLGGSK	S			Cmpd 214, AutoMSn(437.7543), 16.2 min
30	gi|395835411	PREDICTED: keratin, type II cytoskeletal 1 [Otolemur garnettii]	150	66504	10	3	3	2	5.1	6.65	2018	1	0	0	437.754	873.494	2	873.492	0.0022	0	34.71	7.1	R	SLVNLGGSK	S			Cmpd 242, AutoMSn(437.7544), 16.2 min
30	gi|395835411	PREDICTED: keratin, type II cytoskeletal 1 [Otolemur garnettii]	150	66504	10	3	3	2	5.1	6.65	4095	1	0	1	465.254	1392.74	3	1392.72	0.0159	1	78.52	0.00022	R	TNAENEFVTLKK	D			Cmpd 198, AutoMSn(465.2542), 15.2 min
30	gi|395835411	PREDICTED: keratin, type II cytoskeletal 1 [Otolemur garnettii]	150	66504	10	3	3	2	5.1	6.65	4096	3	0	1	465.255	1392.74	3	1392.72	0.0176	1	18.04	240	R	TNAENEFVTLKK	D			Cmpd 95, AutoMSn(465.2548), 15.2 min
30	gi|395835411	PREDICTED: keratin, type II cytoskeletal 1 [Otolemur garnettii]	150	66504	10	3	3	2	5.1	6.65	4097	1	0	1	465.255	1392.74	3	1392.72	0.018	1	33.84	6.4	R	TNAENEFVTLKK	D			Cmpd 168, AutoMSn(465.2549), 15.2 min
30	gi|395835411	PREDICTED: keratin, type II cytoskeletal 1 [Otolemur garnettii]	150	66504	10	3	3	2	5.1	6.65	4098	1	0	1	465.256	1392.75	3	1392.72	0.0217	1	30.37	14	R	TNAENEFVTLKK	D			Cmpd 201, AutoMSn(465.2561), 15.3 min
30	gi|395835411	PREDICTED: keratin, type II cytoskeletal 1 [Otolemur garnettii]	150	66504	10	3	3	2	5.1	6.65	4283	1	0	0	738.398	1474.78	2	1474.78	0.0035	0	70.68	0.0013	R	FLEQQNQVLQTK	W			Cmpd 272, AutoMSn(738.3980), 17.5 min
30	gi|395835411	PREDICTED: keratin, type II cytoskeletal 1 [Otolemur garnettii]	150	66504	10	3	3	2	5.1	6.65	4285	1	0	0	738.401	1474.79	2	1474.78	0.009	0	50.71	0.13	R	FLEQQNQVLQTK	W			Cmpd 275, AutoMSn(738.4008), 17.6 min
30	gi|395835411	PREDICTED: keratin, type II cytoskeletal 1 [Otolemur garnettii]	150	66504	10	3	3	2	5.1	6.65	4286	1	0	0	738.401	1474.79	2	1474.78	0.0091	0	83.5	6.8e-05	R	FLEQQNQVLQTK	W			Cmpd 301, AutoMSn(738.4008), 17.6 min
30	gi|395835411	PREDICTED: keratin, type II cytoskeletal 1 [Otolemur garnettii]	150	66504	10	3	3	2	5.1	6.65	4287	6	0	0	738.401	1474.79	2	1474.78	0.0093	0	16.59	340	R	FLEQQNQVLQTK	W			Cmpd 186, AutoMSn(738.4009), 17.5 min	emPAI	0.16
31	gi|4159806	type II keratin subunit protein [Mus musculus]	149	65183	8	3	2	2	3.8	8.97	4095	1	0	0	465.254	1392.74	3	1392.72	0.0159	1	78.52	0.00022	R	TNAENEFVTIKK	D			Cmpd 198, AutoMSn(465.2542), 15.2 min
31	gi|4159806	type II keratin subunit protein [Mus musculus]	149	65183	8	3	2	2	3.8	8.97	4096	3	0	0	465.255	1392.74	3	1392.72	0.0176	1	18.04	240	R	TNAENEFVTIKK	D			Cmpd 95, AutoMSn(465.2548), 15.2 min
31	gi|4159806	type II keratin subunit protein [Mus musculus]	149	65183	8	3	2	2	3.8	8.97	4097	1	0	0	465.255	1392.74	3	1392.72	0.018	1	33.84	6.4	R	TNAENEFVTIKK	D			Cmpd 168, AutoMSn(465.2549), 15.2 min
31	gi|4159806	type II keratin subunit protein [Mus musculus]	149	65183	8	3	2	2	3.8	8.97	4098	1	0	0	465.256	1392.75	3	1392.72	0.0217	1	30.37	14	R	TNAENEFVTIKK	D			Cmpd 201, AutoMSn(465.2561), 15.3 min
31	gi|4159806	type II keratin subunit protein [Mus musculus]	149	65183	8	3	2	2	3.8	8.97	4283	1	0	0	738.398	1474.78	2	1474.81	-0.0328	1	70.68	0.0013	R	FLEQQNKVLQTK	W			Cmpd 272, AutoMSn(738.3980), 17.5 min
31	gi|4159806	type II keratin subunit protein [Mus musculus]	149	65183	8	3	2	2	3.8	8.97	4285	1	0	0	738.401	1474.79	2	1474.81	-0.0273	1	50.71	0.13	R	FLEQQNKVLQTK	W			Cmpd 275, AutoMSn(738.4008), 17.6 min
31	gi|4159806	type II keratin subunit protein [Mus musculus]	149	65183	8	3	2	2	3.8	8.97	4286	1	0	0	738.401	1474.79	2	1474.81	-0.0273	1	83.5	6.8e-05	R	FLEQQNKVLQTK	W			Cmpd 301, AutoMSn(738.4008), 17.6 min
31	gi|4159806	type II keratin subunit protein [Mus musculus]	149	65183	8	3	2	2	3.8	8.97	4287	6	0	0	738.401	1474.79	2	1474.81	-0.027	1	16.59	340	R	FLEQQNKVLQTK	W			Cmpd 186, AutoMSn(738.4009), 17.5 min	emPAI	0.1
32	gi|671024020	PREDICTED: LOW QUALITY PROTEIN: keratin, type II cytoskeletal 2 epidermal [Ursus maritimus]	148	66490	10	3	5	2	8.2	6.99	1854	1	0	0	416.252	830.489	2	830.486	0.0025	0	30.27	20	R	SLVGLGGTK	S			Cmpd 239, AutoMSn(416.2516), 16.2 min
32	gi|671024020	PREDICTED: LOW QUALITY PROTEIN: keratin, type II cytoskeletal 2 epidermal [Ursus maritimus]	148	66490	10	3	5	2	8.2	6.99	2470	1	0	0	521.283	1040.55	2	1040.55	0.0018	0	21.41	110	K	VDPEIQNVK	A			Cmpd 186, AutoMSn(521.2833), 14.9 min
32	gi|671024020	PREDICTED: LOW QUALITY PROTEIN: keratin, type II cytoskeletal 2 epidermal [Ursus maritimus]	148	66490	10	3	5	2	8.2	6.99	2471	1	0	0	521.287	1040.56	2	1040.55	0.0093	0	21.59	100	K	VDPEIQNVK	A			Cmpd 189, AutoMSn(521.2870), 15.0 min
32	gi|671024020	PREDICTED: LOW QUALITY PROTEIN: keratin, type II cytoskeletal 2 epidermal [Ursus maritimus]	148	66490	10	3	5	2	8.2	6.99	2785	1	0	1	554.276	1106.54	2	1106.57	-0.0341	1	27.05	35	R	AQYEEIARK	S			Cmpd 131, AutoMSn(554.2762), 14.3 min
32	gi|671024020	PREDICTED: LOW QUALITY PROTEIN: keratin, type II cytoskeletal 2 epidermal [Ursus maritimus]	148	66490	10	3	5	2	8.2	6.99	2786	1	0	1	554.277	1106.54	2	1106.57	-0.0326	1	41.08	1.4	R	AQYEEIARK	S			Cmpd 157, AutoMSn(554.2770), 14.3 min
32	gi|671024020	PREDICTED: LOW QUALITY PROTEIN: keratin, type II cytoskeletal 2 epidermal [Ursus maritimus]	148	66490	10	3	5	2	8.2	6.99	3373	1	0	0	627.81	1253.61	2	1253.6	0.0058	0	84.05	5.9e-05	R	GFSSGSAVVSGGSR	R			Cmpd 180, AutoMSn(627.8102), 14.8 min
32	gi|671024020	PREDICTED: LOW QUALITY PROTEIN: keratin, type II cytoskeletal 2 epidermal [Ursus maritimus]	148	66490	10	3	5	2	8.2	6.99	4283	1	0	0	738.398	1474.78	2	1474.78	0.0035	0	70.68	0.0013	R	FLEQQNQVLQTK	W			Cmpd 272, AutoMSn(738.3980), 17.5 min
32	gi|671024020	PREDICTED: LOW QUALITY PROTEIN: keratin, type II cytoskeletal 2 epidermal [Ursus maritimus]	148	66490	10	3	5	2	8.2	6.99	4285	1	0	0	738.401	1474.79	2	1474.78	0.009	0	50.71	0.13	R	FLEQQNQVLQTK	W			Cmpd 275, AutoMSn(738.4008), 17.6 min
32	gi|671024020	PREDICTED: LOW QUALITY PROTEIN: keratin, type II cytoskeletal 2 epidermal [Ursus maritimus]	148	66490	10	3	5	2	8.2	6.99	4286	1	0	0	738.401	1474.79	2	1474.78	0.0091	0	83.5	6.8e-05	R	FLEQQNQVLQTK	W			Cmpd 301, AutoMSn(738.4008), 17.6 min
32	gi|671024020	PREDICTED: LOW QUALITY PROTEIN: keratin, type II cytoskeletal 2 epidermal [Ursus maritimus]	148	66490	10	3	5	2	8.2	6.99	4287	6	0	0	738.401	1474.79	2	1474.78	0.0093	0	16.59	340	R	FLEQQNQVLQTK	W			Cmpd 186, AutoMSn(738.4009), 17.5 min	emPAI	0.16
33	gi|585651794	PREDICTED: keratin, type II cytoskeletal 2 epidermal [Elephantulus edwardii]	147	65874	12	3	5	2	7.4	6.75	3087	1	0	0	590.305	1178.59	2	1178.62	-0.0236	0	21.63	110	K	YEELQVTAVK	H			Cmpd 273, AutoMSn(590.3046), 17.5 min
33	gi|585651794	PREDICTED: keratin, type II cytoskeletal 2 epidermal [Elephantulus edwardii]	147	65874	12	3	5	2	7.4	6.75	3089	4	0	0	590.307	1178.6	2	1178.62	-0.0191	0	35.4	4.7	K	YEELQVTAVK	H			Cmpd 302, AutoMSn(590.3069), 17.6 min
33	gi|585651794	PREDICTED: keratin, type II cytoskeletal 2 epidermal [Elephantulus edwardii]	147	65874	12	3	5	2	7.4	6.75	3373	1	0	0	627.81	1253.61	2	1253.6	0.0058	0	84.05	5.9e-05	R	GFSSGSAVVSGGSR	R			Cmpd 180, AutoMSn(627.8102), 14.8 min
33	gi|585651794	PREDICTED: keratin, type II cytoskeletal 2 epidermal [Elephantulus edwardii]	147	65874	12	3	5	2	7.4	6.75	4276	2	0	1	738.378	1474.74	2	1474.72	0.0181	0	33.72	6.4	K	WELLQQMDVGTR	T			Cmpd 450, AutoMSn(738.3783), 21.6 min
33	gi|585651794	PREDICTED: keratin, type II cytoskeletal 2 epidermal [Elephantulus edwardii]	147	65874	12	3	5	2	7.4	6.75	4277	2	0	1	738.381	1474.75	2	1474.72	0.024	0	37.64	2.6	K	WELLQQMDVGTR	T			Cmpd 484, AutoMSn(738.3812), 21.7 min
33	gi|585651794	PREDICTED: keratin, type II cytoskeletal 2 epidermal [Elephantulus edwardii]	147	65874	12	3	5	2	7.4	6.75	4279	2	0	1	738.383	1474.75	2	1474.72	0.0266	0	37.35	2.8	K	WELLQQMDVGTR	T			Cmpd 447, AutoMSn(738.3825), 21.5 min
33	gi|585651794	PREDICTED: keratin, type II cytoskeletal 2 epidermal [Elephantulus edwardii]	147	65874	12	3	5	2	7.4	6.75	4280	2	0	1	738.384	1474.75	2	1474.72	0.0296	0	48.23	0.23	K	WELLQQMDVGTR	T			Cmpd 481, AutoMSn(738.3840), 21.6 min
33	gi|585651794	PREDICTED: keratin, type II cytoskeletal 2 epidermal [Elephantulus edwardii]	147	65874	12	3	5	2	7.4	6.75	4283	1	0	0	738.398	1474.78	2	1474.78	0.0035	0	70.68	0.0013	R	FLEQQNQVLQTK	W			Cmpd 272, AutoMSn(738.3980), 17.5 min
33	gi|585651794	PREDICTED: keratin, type II cytoskeletal 2 epidermal [Elephantulus edwardii]	147	65874	12	3	5	2	7.4	6.75	4285	1	0	0	738.401	1474.79	2	1474.78	0.009	0	50.71	0.13	R	FLEQQNQVLQTK	W			Cmpd 275, AutoMSn(738.4008), 17.6 min
33	gi|585651794	PREDICTED: keratin, type II cytoskeletal 2 epidermal [Elephantulus edwardii]	147	65874	12	3	5	2	7.4	6.75	4286	1	0	0	738.401	1474.79	2	1474.78	0.0091	0	83.5	6.8e-05	R	FLEQQNQVLQTK	W			Cmpd 301, AutoMSn(738.4008), 17.6 min
33	gi|585651794	PREDICTED: keratin, type II cytoskeletal 2 epidermal [Elephantulus edwardii]	147	65874	12	3	5	2	7.4	6.75	4287	6	0	0	738.401	1474.79	2	1474.78	0.0093	0	16.59	340	R	FLEQQNQVLQTK	W			Cmpd 186, AutoMSn(738.4009), 17.5 min
33	gi|585651794	PREDICTED: keratin, type II cytoskeletal 2 epidermal [Elephantulus edwardii]	147	65874	12	3	5	2	7.4	6.75	6556	10	0	1	978.182	2931.52	3	2931.49	0.033	1	16.33	230	R	FLEQQNQVLQTKWELLQQMDVGTR	T			Cmpd 557, AutoMSn(978.1820), 23.4 min	emPAI	0.1
34	gi|148747492	keratin, type II cytoskeletal 2 epidermal [Sus scrofa]	147	65826	6	3	3	2	5.5	7.47	1854	1	0	0	416.252	830.489	2	830.486	0.0025	0	30.27	20	R	SLVGLGGTK	S			Cmpd 239, AutoMSn(416.2516), 16.2 min
34	gi|148747492	keratin, type II cytoskeletal 2 epidermal [Sus scrofa]	147	65826	6	3	3	2	5.5	7.47	3373	1	0	0	627.81	1253.61	2	1253.6	0.0058	0	84.05	5.9e-05	R	GFSSGSAVVSGGSR	G			Cmpd 180, AutoMSn(627.8102), 14.8 min
34	gi|148747492	keratin, type II cytoskeletal 2 epidermal [Sus scrofa]	147	65826	6	3	3	2	5.5	7.47	4283	1	0	0	738.398	1474.78	2	1474.81	-0.0328	1	70.68	0.0013	R	FLEQQNQVLKTK	W			Cmpd 272, AutoMSn(738.3980), 17.5 min
34	gi|148747492	keratin, type II cytoskeletal 2 epidermal [Sus scrofa]	147	65826	6	3	3	2	5.5	7.47	4285	1	0	0	738.401	1474.79	2	1474.81	-0.0273	1	50.71	0.13	R	FLEQQNQVLKTK	W			Cmpd 275, AutoMSn(738.4008), 17.6 min
34	gi|148747492	keratin, type II cytoskeletal 2 epidermal [Sus scrofa]	147	65826	6	3	3	2	5.5	7.47	4286	1	0	0	738.401	1474.79	2	1474.81	-0.0273	1	83.5	6.8e-05	R	FLEQQNQVLKTK	W			Cmpd 301, AutoMSn(738.4008), 17.6 min
34	gi|148747492	keratin, type II cytoskeletal 2 epidermal [Sus scrofa]	147	65826	6	3	3	2	5.5	7.47	4287	6	0	0	738.401	1474.79	2	1474.81	-0.027	1	16.59	340	R	FLEQQNQVLKTK	W			Cmpd 186, AutoMSn(738.4009), 17.5 min	emPAI	0.1
35	gi|338855324	metalloproteinase 8 [Crotalus adamanteus]	146	54579	24	2	2	1	5.4	5.07	2545	1	1	0	1056.46	1055.45	1	1055.46	-0.0058	0	28.68	23	R	QCVDVTTAY	-	Carbamidomethyl (C)	0.010000000.0	Cmpd 339, AutoMSn(1056.4608), 18.4 min
35	gi|338855324	metalloproteinase 8 [Crotalus adamanteus]	146	54579	24	2	2	1	5.4	5.07	2546	1	1	0	1056.46	1055.45	1	1055.46	-0.0057	0	33.37	7.9	R	QCVDVTTAY	-	Carbamidomethyl (C)	0.010000000.0	Cmpd 342, AutoMSn(1056.4610), 18.5 min
35	gi|338855324	metalloproteinase 8 [Crotalus adamanteus]	146	54579	24	2	2	1	5.4	5.07	2547	1	1	0	1056.46	1055.45	1	1055.46	-0.005	0	28.83	22	R	QCVDVTTAY	-	Carbamidomethyl (C)	0.010000000.0	Cmpd 334, AutoMSn(1056.4617), 18.4 min
35	gi|338855324	metalloproteinase 8 [Crotalus adamanteus]	146	54579	24	2	2	1	5.4	5.07	2549	1	1	0	1056.46	1055.45	1	1055.46	-0.0049	0	32.52	9.6	R	QCVDVTTAY	-	Carbamidomethyl (C)	0.010000000.0	Cmpd 349, AutoMSn(1056.4618), 18.6 min
35	gi|338855324	metalloproteinase 8 [Crotalus adamanteus]	146	54579	24	2	2	1	5.4	5.07	2550	1	1	0	1056.46	1055.45	1	1055.46	-0.0047	0	36.63	3.7	R	QCVDVTTAY	-	Carbamidomethyl (C)	0.010000000.0	Cmpd 345, AutoMSn(1056.4619), 18.6 min
35	gi|338855324	metalloproteinase 8 [Crotalus adamanteus]	146	54579	24	2	2	1	5.4	5.07	2552	1	1	0	1056.46	1055.46	1	1055.46	-0.004	0	28.35	25	R	QCVDVTTAY	-	Carbamidomethyl (C)	0.010000000.0	Cmpd 388, AutoMSn(1056.4626), 18.5 min
35	gi|338855324	metalloproteinase 8 [Crotalus adamanteus]	146	54579	24	2	2	1	5.4	5.07	2555	1	1	0	1056.46	1055.46	1	1055.46	-0.0021	0	30.06	17	R	QCVDVTTAY	-	Carbamidomethyl (C)	0.010000000.0	Cmpd 391, AutoMSn(1056.4645), 18.6 min
35	gi|338855324	metalloproteinase 8 [Crotalus adamanteus]	146	54579	24	2	2	1	5.4	5.07	2556	1	1	0	1056.46	1055.46	1	1055.46	-0.002	0	31.31	13	R	QCVDVTTAY	-	Carbamidomethyl (C)	0.010000000.0	Cmpd 335, AutoMSn(1056.4646), 18.5 min
35	gi|338855324	metalloproteinase 8 [Crotalus adamanteus]	146	54579	24	2	2	1	5.4	5.07	2557	1	1	0	1056.46	1055.46	1	1055.46	-0.0019	0	36.08	4.2	R	QCVDVTTAY	-	Carbamidomethyl (C)	0.010000000.0	Cmpd 338, AutoMSn(1056.4647), 18.6 min
35	gi|338855324	metalloproteinase 8 [Crotalus adamanteus]	146	54579	24	2	2	1	5.4	5.07	2558	1	1	0	1056.47	1055.46	1	1055.46	-0.0009	0	21.7	120	R	QCVDVTTAY	-	Carbamidomethyl (C)	0.010000000.0	Cmpd 346, AutoMSn(1056.4658), 18.6 min
35	gi|338855324	metalloproteinase 8 [Crotalus adamanteus]	146	54579	24	2	2	1	5.4	5.07	2559	7	1	0	528.737	1055.46	2	1055.46	-0.0003	0	11.31	1300	R	QCVDVTTAY	-	Carbamidomethyl (C)	0.010000000.0	Cmpd 314, AutoMSn(528.7368), 18.4 min
35	gi|338855324	metalloproteinase 8 [Crotalus adamanteus]	146	54579	24	2	2	1	5.4	5.07	2562	1	1	0	528.738	1055.46	2	1055.46	0.0025	0	13.63	740	R	QCVDVTTAY	-	Carbamidomethyl (C)	0.010000000.0	Cmpd 389, AutoMSn(528.7382), 18.5 min
35	gi|338855324	metalloproteinase 8 [Crotalus adamanteus]	146	54579	24	2	2	1	5.4	5.07	2564	3	1	0	528.739	1055.46	2	1055.46	0.004	0	12.67	920	R	QCVDVTTAY	-	Carbamidomethyl (C)	0.010000000.0	Cmpd 347, AutoMSn(528.7390), 18.6 min
35	gi|338855324	metalloproteinase 8 [Crotalus adamanteus]	146	54579	24	2	2	1	5.4	5.07	2567	1	1	0	528.739	1055.46	2	1055.46	0.0046	0	19.89	170	R	QCVDVTTAY	-	Carbamidomethyl (C)	0.010000000.0	Cmpd 339, AutoMSn(528.7393), 18.6 min
35	gi|338855324	metalloproteinase 8 [Crotalus adamanteus]	146	54579	24	2	2	1	5.4	5.07	2569	1	1	0	528.74	1055.46	2	1055.46	0.0056	0	19.76	180	R	QCVDVTTAY	-	Carbamidomethyl (C)	0.010000000.0	Cmpd 346, AutoMSn(528.7398), 18.6 min
35	gi|338855324	metalloproteinase 8 [Crotalus adamanteus]	146	54579	24	2	2	1	5.4	5.07	2574	1	1	0	528.74	1055.47	2	1055.46	0.0068	0	16.37	390	R	QCVDVTTAY	-	Carbamidomethyl (C)	0.010000000.0	Cmpd 336, AutoMSn(528.7404), 18.5 min
35	gi|338855324	metalloproteinase 8 [Crotalus adamanteus]	146	54579	24	2	2	1	5.4	5.07	2575	1	1	0	528.74	1055.47	2	1055.46	0.0068	0	35.03	5.3	R	QCVDVTTAY	-	Carbamidomethyl (C)	0.010000000.0	Cmpd 343, AutoMSn(528.7404), 18.5 min
35	gi|338855324	metalloproteinase 8 [Crotalus adamanteus]	146	54579	24	2	2	1	5.4	5.07	2576	7	1	0	528.741	1055.47	2	1055.46	0.0072	0	12.03	1100	R	QCVDVTTAY	-	Carbamidomethyl (C)	0.010000000.0	Cmpd 386, AutoMSn(528.7406), 18.5 min
35	gi|338855324	metalloproteinase 8 [Crotalus adamanteus]	146	54579	24	2	2	1	5.4	5.07	2578	4	1	0	528.744	1055.47	2	1055.46	0.0149	0	13.41	770	R	QCVDVTTAY	-	Carbamidomethyl (C)	0.010000000.0	Cmpd 315, AutoMSn(528.7444), 18.5 min
35	gi|338855324	metalloproteinase 8 [Crotalus adamanteus]	146	54579	24	2	2	1	5.4	5.07	6012	1	1	1	742.299	2223.87	3	2223.86	0.019	0	58.61	0.023	K	LHSWVECESGECCQQCR	F	4 Carbamidomethyl (C)	0.00000010000110010.0	Cmpd 193, AutoMSn(742.2988), 15.1 min
35	gi|338855324	metalloproteinase 8 [Crotalus adamanteus]	146	54579	24	2	2	1	5.4	5.07	6013	1	1	1	742.3	2223.88	3	2223.86	0.0238	0	47.81	0.27	K	LHSWVECESGECCQQCR	F	4 Carbamidomethyl (C)	0.00000010000110010.0	Cmpd 188, AutoMSn(742.3003), 15.2 min
35	gi|338855324	metalloproteinase 8 [Crotalus adamanteus]	146	54579	24	2	2	1	5.4	5.07	6014	1	1	1	742.3	2223.88	3	2223.86	0.024	0	25.33	48	K	LHSWVECESGECCQQCR	F	4 Carbamidomethyl (C)	0.00000010000110010.0	Cmpd 241, AutoMSn(742.3004), 15.2 min
35	gi|338855324	metalloproteinase 8 [Crotalus adamanteus]	146	54579	24	2	2	1	5.4	5.07	6015	1	1	1	742.301	2223.88	3	2223.86	0.0247	0	59.33	0.019	K	LHSWVECESGECCQQCR	F	4 Carbamidomethyl (C)	0.00000010000110010.0	Cmpd 185, AutoMSn(742.3006), 15.1 min
35	gi|338855324	metalloproteinase 8 [Crotalus adamanteus]	146	54579	24	2	2	1	5.4	5.07	6016	1	1	1	742.301	2223.88	3	2223.86	0.025	0	54.37	0.059	K	LHSWVECESGECCQQCR	F	4 Carbamidomethyl (C)	0.00000010000110010.0	Cmpd 184, AutoMSn(742.3007), 15.1 min	emPAI	0.19
36	gi|20177994	RecName: Full=Acidic phospholipase A2 6; Short=svPLA2; AltName: Full=Phosphatidylcholine 2-acylhydrolase; AltName: Full=Phospholipase A2 isozyme VI; Short=PLA2-VI; Flags: Precursor [Trimeresurus gramineus]	146	15712	9	4	3	1	21	4.72	1734	1	0	0	404.712	807.409	2	807.406	0.0032	0	50.09	0.17	K	AAAICFR	D	Carbamidomethyl (C)	0.0000100.0	Cmpd 207, AutoMSn(404.7119), 15.7 min
36	gi|20177994	RecName: Full=Acidic phospholipase A2 6; Short=svPLA2; AltName: Full=Phosphatidylcholine 2-acylhydrolase; AltName: Full=Phospholipase A2 isozyme VI; Short=PLA2-VI; Flags: Precursor [Trimeresurus gramineus]	146	15712	9	4	3	1	21	4.72	1735	1	0	0	404.712	807.41	2	807.406	0.0043	0	54.57	0.06	K	AAAICFR	D	Carbamidomethyl (C)	0.0000100.0	Cmpd 211, AutoMSn(404.7125), 15.8 min
36	gi|20177994	RecName: Full=Acidic phospholipase A2 6; Short=svPLA2; AltName: Full=Phosphatidylcholine 2-acylhydrolase; AltName: Full=Phospholipase A2 isozyme VI; Short=PLA2-VI; Flags: Precursor [Trimeresurus gramineus]	146	15712	9	4	3	1	21	4.72	1736	1	0	0	404.714	807.413	2	807.406	0.0069	0	35.14	5.3	K	AAAICFR	D	Carbamidomethyl (C)	0.0000100.0	Cmpd 208, AutoMSn(404.7138), 15.7 min
36	gi|20177994	RecName: Full=Acidic phospholipase A2 6; Short=svPLA2; AltName: Full=Phosphatidylcholine 2-acylhydrolase; AltName: Full=Phospholipase A2 isozyme VI; Short=PLA2-VI; Flags: Precursor [Trimeresurus gramineus]	146	15712	9	4	3	1	21	4.72	5055	1	0	0	871.891	1741.77	2	1741.76	0.0091	1	31.28	10	K	EICECDKAAAICFR	D	3 Carbamidomethyl (C)	0.00101000000100.0	Cmpd 272, AutoMSn(871.8911), 17.2 min
36	gi|20177994	RecName: Full=Acidic phospholipase A2 6; Short=svPLA2; AltName: Full=Phosphatidylcholine 2-acylhydrolase; AltName: Full=Phospholipase A2 isozyme VI; Short=PLA2-VI; Flags: Precursor [Trimeresurus gramineus]	146	15712	9	4	3	1	21	4.72	5056	1	0	0	871.894	1741.77	2	1741.76	0.0138	1	66.9	0.0028	K	EICECDKAAAICFR	D	3 Carbamidomethyl (C)	0.00101000000100.0	Cmpd 269, AutoMSn(871.8935), 17.1 min
36	gi|20177994	RecName: Full=Acidic phospholipase A2 6; Short=svPLA2; AltName: Full=Phosphatidylcholine 2-acylhydrolase; AltName: Full=Phospholipase A2 isozyme VI; Short=PLA2-VI; Flags: Precursor [Trimeresurus gramineus]	146	15712	9	4	3	1	21	4.72	5057	1	0	0	581.6	1741.78	3	1741.76	0.0186	1	68.34	0.002	K	EICECDKAAAICFR	D	3 Carbamidomethyl (C)	0.00101000000100.0	Cmpd 268, AutoMSn(581.5997), 17.1 min
36	gi|20177994	RecName: Full=Acidic phospholipase A2 6; Short=svPLA2; AltName: Full=Phosphatidylcholine 2-acylhydrolase; AltName: Full=Phospholipase A2 isozyme VI; Short=PLA2-VI; Flags: Precursor [Trimeresurus gramineus]	146	15712	9	4	3	1	21	4.72	5058	1	0	0	581.6	1741.78	3	1741.76	0.0194	1	55.53	0.038	K	EICECDKAAAICFR	D	3 Carbamidomethyl (C)	0.00101000000100.0	Cmpd 271, AutoMSn(581.6000), 17.1 min
36	gi|20177994	RecName: Full=Acidic phospholipase A2 6; Short=svPLA2; AltName: Full=Phosphatidylcholine 2-acylhydrolase; AltName: Full=Phospholipase A2 isozyme VI; Short=PLA2-VI; Flags: Precursor [Trimeresurus gramineus]	146	15712	9	4	3	1	21	4.72	5059	1	0	0	581.6	1741.78	3	1741.76	0.0207	1	61.07	0.011	K	EICECDKAAAICFR	D	3 Carbamidomethyl (C)	0.00101000000100.0	Cmpd 276, AutoMSn(581.6004), 17.2 min
36	gi|20177994	RecName: Full=Acidic phospholipase A2 6; Short=svPLA2; AltName: Full=Phosphatidylcholine 2-acylhydrolase; AltName: Full=Phospholipase A2 isozyme VI; Short=PLA2-VI; Flags: Precursor [Trimeresurus gramineus]	146	15712	9	4	3	1	21	4.72	5384	2	1	1	922.383	1842.75	2	1842.75	0.0027	0	22.16	98	R	SGIWWYGSYGCYCGK	G	2 Carbamidomethyl (C)	0.000000000010100.0	Cmpd 516, AutoMSn(922.3833), 22.7 min	emPAI	0.79
37	gi|585651800	PREDICTED: keratin, type II cytoskeletal 1b [Elephantulus edwardii]	138	63054	12	5	2	2	4.1	8.16	3517	1	0	1	651.862	1301.71	2	1301.71	0.0016	0	51.26	0.12	R	SLDLDSIIEAVK	T			Cmpd 597, AutoMSn(651.8620), 26.0 min
37	gi|585651800	PREDICTED: keratin, type II cytoskeletal 1b [Elephantulus edwardii]	138	63054	12	5	2	2	4.1	8.16	3520	1	0	1	651.864	1301.71	2	1301.71	0.0046	0	55.33	0.047	R	SLDLDSIIEAVK	T			Cmpd 416, AutoMSn(651.8635), 25.9 min
37	gi|585651800	PREDICTED: keratin, type II cytoskeletal 1b [Elephantulus edwardii]	138	63054	12	5	2	2	4.1	8.16	3522	1	0	1	651.864	1301.71	2	1301.71	0.0057	0	68.08	0.0025	R	SLDLDSIIEAVK	T			Cmpd 654, AutoMSn(651.8640), 26.0 min
37	gi|585651800	PREDICTED: keratin, type II cytoskeletal 1b [Elephantulus edwardii]	138	63054	12	5	2	2	4.1	8.16	3523	1	0	1	651.864	1301.71	2	1301.71	0.0059	0	33	8	R	SLDLDSIIEAVK	T			Cmpd 594, AutoMSn(651.8641), 25.9 min
37	gi|585651800	PREDICTED: keratin, type II cytoskeletal 1b [Elephantulus edwardii]	138	63054	12	5	2	2	4.1	8.16	3525	2	0	1	651.865	1301.71	2	1301.71	0.0068	0	57.17	0.031	R	SLDLDSIIEAVK	T			Cmpd 651, AutoMSn(651.8646), 25.9 min
37	gi|585651800	PREDICTED: keratin, type II cytoskeletal 1b [Elephantulus edwardii]	138	63054	12	5	2	2	4.1	8.16	3528	1	0	1	651.866	1301.72	2	1301.71	0.0092	0	21.91	100	R	SLDLDSIIEAVK	T			Cmpd 658, AutoMSn(651.8658), 25.9 min
37	gi|585651800	PREDICTED: keratin, type II cytoskeletal 1b [Elephantulus edwardii]	138	63054	12	5	2	2	4.1	8.16	3529	1	0	1	651.866	1301.72	2	1301.71	0.0095	0	38.59	2.2	R	SLDLDSIIEAVK	T			Cmpd 591, AutoMSn(651.8659), 25.8 min
37	gi|585651800	PREDICTED: keratin, type II cytoskeletal 1b [Elephantulus edwardii]	138	63054	12	5	2	2	4.1	8.16	3531	4	0	1	651.868	1301.72	2	1301.71	0.0137	0	23.39	73	R	SLDLDSIIEAVK	T			Cmpd 648, AutoMSn(651.8680), 25.8 min
37	gi|585651800	PREDICTED: keratin, type II cytoskeletal 1b [Elephantulus edwardii]	138	63054	12	5	2	2	4.1	8.16	4283	1	0	0	738.398	1474.78	2	1474.78	0.0035	0	70.68	0.0013	R	FLEQQNQVLQTK	W			Cmpd 272, AutoMSn(738.3980), 17.5 min
37	gi|585651800	PREDICTED: keratin, type II cytoskeletal 1b [Elephantulus edwardii]	138	63054	12	5	2	2	4.1	8.16	4285	1	0	0	738.401	1474.79	2	1474.78	0.009	0	50.71	0.13	R	FLEQQNQVLQTK	W			Cmpd 275, AutoMSn(738.4008), 17.6 min
37	gi|585651800	PREDICTED: keratin, type II cytoskeletal 1b [Elephantulus edwardii]	138	63054	12	5	2	2	4.1	8.16	4286	1	0	0	738.401	1474.79	2	1474.78	0.0091	0	83.5	6.8e-05	R	FLEQQNQVLQTK	W			Cmpd 301, AutoMSn(738.4008), 17.6 min
37	gi|585651800	PREDICTED: keratin, type II cytoskeletal 1b [Elephantulus edwardii]	138	63054	12	5	2	2	4.1	8.16	4287	6	0	0	738.401	1474.79	2	1474.78	0.0093	0	16.59	340	R	FLEQQNQVLQTK	W			Cmpd 186, AutoMSn(738.4009), 17.5 min	emPAI	0.11
38	gi|13959429	RecName: Full=Basic phospholipase A2 2; Short=svPLA2; AltName: Full=PLA2-II; AltName: Full=Phosphatidylcholine 2-acylhydrolase, partial [Trimeresurus stejnegeri]	130	7813	6	2	1	1	14.3	8.49	2929	1	1	1	573.221	1144.43	2	1144.42	0.0061	0	51.49	0.15	K	YGCNCGMAGR	G	2 Carbamidomethyl (C)	0.0010100000.0	Cmpd 62, AutoMSn(573.2209), 12.5 min
38	gi|13959429	RecName: Full=Basic phospholipase A2 2; Short=svPLA2; AltName: Full=PLA2-II; AltName: Full=Phosphatidylcholine 2-acylhydrolase, partial [Trimeresurus stejnegeri]	130	7813	6	2	1	1	14.3	8.49	2930	1	1	1	573.223	1144.43	2	1144.42	0.0097	0	43.39	0.96	K	YGCNCGMAGR	G	2 Carbamidomethyl (C)	0.0010100000.0	Cmpd 64, AutoMSn(573.2227), 12.5 min
38	gi|13959429	RecName: Full=Basic phospholipase A2 2; Short=svPLA2; AltName: Full=PLA2-II; AltName: Full=Phosphatidylcholine 2-acylhydrolase, partial [Trimeresurus stejnegeri]	130	7813	6	2	1	1	14.3	8.49	2931	1	1	1	573.223	1144.43	2	1144.42	0.0113	0	49.06	0.26	K	YGCNCGMAGR	G	2 Carbamidomethyl (C)	0.0010100000.0	Cmpd 101, AutoMSn(573.2235), 12.5 min
38	gi|13959429	RecName: Full=Basic phospholipase A2 2; Short=svPLA2; AltName: Full=PLA2-II; AltName: Full=Phosphatidylcholine 2-acylhydrolase, partial [Trimeresurus stejnegeri]	130	7813	6	2	1	1	14.3	8.49	2932	1	1	1	573.224	1144.43	2	1144.42	0.0128	0	58.92	0.027	K	YGCNCGMAGR	G	2 Carbamidomethyl (C)	0.0010100000.0	Cmpd 103, AutoMSn(573.2243), 12.5 min
38	gi|13959429	RecName: Full=Basic phospholipase A2 2; Short=svPLA2; AltName: Full=PLA2-II; AltName: Full=Phosphatidylcholine 2-acylhydrolase, partial [Trimeresurus stejnegeri]	130	7813	6	2	1	1	14.3	8.49	2933	1	1	1	573.225	1144.43	2	1144.42	0.0134	0	56.08	0.051	K	YGCNCGMAGR	G	2 Carbamidomethyl (C)	0.0010100000.0	Cmpd 106, AutoMSn(573.2246), 12.6 min
38	gi|13959429	RecName: Full=Basic phospholipase A2 2; Short=svPLA2; AltName: Full=PLA2-II; AltName: Full=Phosphatidylcholine 2-acylhydrolase, partial [Trimeresurus stejnegeri]	130	7813	6	2	1	1	14.3	8.49	3019	1	1	1	581.22	1160.43	2	1160.42	0.0093	0	26.79	46	K	YGCNCGMAGR	G	2 Carbamidomethyl (C); Oxidation (M)	0.0010102000.0	Cmpd 53, AutoMSn(581.2200), 11.3 min	emPAI	0.45
39	gi|156485582	PLA2(IIA)-Aze2 [Azemiops feae]	130	17073	8	2	2	1	11.9	8.86	1734	1	0	0	404.712	807.409	2	807.406	0.0032	0	50.09	0.17	K	AAAICFR	R	Carbamidomethyl (C)	0.0000100.0	Cmpd 207, AutoMSn(404.7119), 15.7 min
39	gi|156485582	PLA2(IIA)-Aze2 [Azemiops feae]	130	17073	8	2	2	1	11.9	8.86	1735	1	0	0	404.712	807.41	2	807.406	0.0043	0	54.57	0.06	K	AAAICFR	R	Carbamidomethyl (C)	0.0000100.0	Cmpd 211, AutoMSn(404.7125), 15.8 min
39	gi|156485582	PLA2(IIA)-Aze2 [Azemiops feae]	130	17073	8	2	2	1	11.9	8.86	1736	1	0	0	404.714	807.413	2	807.406	0.0069	0	35.14	5.3	K	AAAICFR	R	Carbamidomethyl (C)	0.0000100.0	Cmpd 208, AutoMSn(404.7138), 15.7 min
39	gi|156485582	PLA2(IIA)-Aze2 [Azemiops feae]	130	17073	8	2	2	1	11.9	8.86	4433	1	1	1	767.282	1532.55	2	1532.54	0.0081	0	44.02	0.88	R	CCFVHDCCYGR	V	4 Carbamidomethyl (C)	0.11000011000.0	Cmpd 140, AutoMSn(767.2822), 14.2 min
39	gi|156485582	PLA2(IIA)-Aze2 [Azemiops feae]	130	17073	8	2	2	1	11.9	8.86	4434	1	1	1	767.283	1532.55	2	1532.54	0.009	0	43.62	0.97	R	CCFVHDCCYGR	V	4 Carbamidomethyl (C)	0.11000011000.0	Cmpd 143, AutoMSn(767.2827), 14.3 min
39	gi|156485582	PLA2(IIA)-Aze2 [Azemiops feae]	130	17073	8	2	2	1	11.9	8.86	4436	1	1	1	511.861	1532.56	3	1532.54	0.0204	0	72.8	0.0011	R	CCFVHDCCYGR	V	4 Carbamidomethyl (C)	0.11000011000.0	Cmpd 139, AutoMSn(511.8613), 14.2 min
39	gi|156485582	PLA2(IIA)-Aze2 [Azemiops feae]	130	17073	8	2	2	1	11.9	8.86	4437	1	1	1	511.861	1532.56	3	1532.54	0.0207	0	72.83	0.0011	R	CCFVHDCCYGR	V	4 Carbamidomethyl (C)	0.11000011000.0	Cmpd 142, AutoMSn(511.8614), 14.3 min
39	gi|156485582	PLA2(IIA)-Aze2 [Azemiops feae]	130	17073	8	2	2	1	11.9	8.86	4438	1	1	1	511.863	1532.57	3	1532.54	0.025	0	55.4	0.06	R	CCFVHDCCYGR	V	4 Carbamidomethyl (C)	0.11000011000.0	Cmpd 137, AutoMSn(511.8629), 14.1 min	emPAI	0.72
40	gi|686740899	PREDICTED: keratin, type II cytoskeletal 1 [Pongo abelii]	127	38939	18	4	5	2	13.8	5.01	2426	1	0	0	517.262	1032.51	2	1032.51	0	0	40.19	1.8	R	TLLEGEESR	M			Cmpd 115, AutoMSn(517.2616), 14.8 min
40	gi|686740899	PREDICTED: keratin, type II cytoskeletal 1 [Pongo abelii]	127	38939	18	4	5	2	13.8	5.01	2427	1	0	0	517.263	1032.51	2	1032.51	0.0031	0	30.45	17	R	TLLEGEESR	M			Cmpd 18, AutoMSn(517.2632), 14.8 min
40	gi|686740899	PREDICTED: keratin, type II cytoskeletal 1 [Pongo abelii]	127	38939	18	4	5	2	13.8	5.01	2428	1	0	0	517.263	1032.51	2	1032.51	0.0032	0	59.02	0.024	R	TLLEGEESR	M			Cmpd 181, AutoMSn(517.2632), 14.9 min
40	gi|686740899	PREDICTED: keratin, type II cytoskeletal 1 [Pongo abelii]	127	38939	18	4	5	2	13.8	5.01	2429	1	0	0	517.263	1032.51	2	1032.51	0.0034	0	55.38	0.055	R	TLLEGEESR	M			Cmpd 150, AutoMSn(517.2633), 14.8 min
40	gi|686740899	PREDICTED: keratin, type II cytoskeletal 1 [Pongo abelii]	127	38939	18	4	5	2	13.8	5.01	2430	1	0	0	517.264	1032.51	2	1032.51	0.0047	0	58.91	0.024	R	TLLEGEESR	M			Cmpd 178, AutoMSn(517.2640), 14.8 min
40	gi|686740899	PREDICTED: keratin, type II cytoskeletal 1 [Pongo abelii]	127	38939	18	4	5	2	13.8	5.01	2432	1	0	0	517.265	1032.52	2	1032.51	0.0077	0	33.81	7.8	R	TLLEGEESR	M			Cmpd 157, AutoMSn(517.2655), 14.9 min
40	gi|686740899	PREDICTED: keratin, type II cytoskeletal 1 [Pongo abelii]	127	38939	18	4	5	2	13.8	5.01	2433	1	0	0	517.266	1032.52	2	1032.51	0.008	0	21.02	150	R	TLLEGEESR	M			Cmpd 80, AutoMSn(517.2656), 14.8 min
40	gi|686740899	PREDICTED: keratin, type II cytoskeletal 1 [Pongo abelii]	127	38939	18	4	5	2	13.8	5.01	2612	1	0	0	533.268	1064.52	2	1064.51	0.0074	0	27.36	31	K	AQYEDIAQK	S			Cmpd 140, AutoMSn(533.2679), 13.9 min
40	gi|686740899	PREDICTED: keratin, type II cytoskeletal 1 [Pongo abelii]	127	38939	18	4	5	2	13.8	5.01	2613	1	0	0	533.268	1064.52	2	1064.51	0.0075	0	29.82	17	K	AQYEDIAQK	S			Cmpd 109, AutoMSn(533.2679), 13.8 min
40	gi|686740899	PREDICTED: keratin, type II cytoskeletal 1 [Pongo abelii]	127	38939	18	4	5	2	13.8	5.01	2614	1	0	0	533.269	1064.52	2	1064.51	0.0085	0	25.16	51	K	AQYEDIAQK	S			Cmpd 113, AutoMSn(533.2684), 13.9 min
40	gi|686740899	PREDICTED: keratin, type II cytoskeletal 1 [Pongo abelii]	127	38939	18	4	5	2	13.8	5.01	2615	4	0	0	533.269	1064.52	2	1064.51	0.0102	0	12.78	870	K	AQYEDIAQK	S			Cmpd 55, AutoMSn(533.2693), 13.9 min
40	gi|686740899	PREDICTED: keratin, type II cytoskeletal 1 [Pongo abelii]	127	38939	18	4	5	2	13.8	5.01	3087	1	0	0	590.305	1178.59	2	1178.59	0.0016	0	21.63	110	K	YEELQITAGR	H			Cmpd 273, AutoMSn(590.3046), 17.5 min
40	gi|686740899	PREDICTED: keratin, type II cytoskeletal 1 [Pongo abelii]	127	38939	18	4	5	2	13.8	5.01	3089	1	0	0	590.307	1178.6	2	1178.59	0.0061	0	51.09	0.13	K	YEELQITAGR	H			Cmpd 302, AutoMSn(590.3069), 17.6 min
40	gi|686740899	PREDICTED: keratin, type II cytoskeletal 1 [Pongo abelii]	127	38939	18	4	5	2	13.8	5.01	4095	1	0	0	465.254	1392.74	3	1392.72	0.0159	1	78.52	0.00022	R	TNAENEFVTIKK	D			Cmpd 198, AutoMSn(465.2542), 15.2 min
40	gi|686740899	PREDICTED: keratin, type II cytoskeletal 1 [Pongo abelii]	127	38939	18	4	5	2	13.8	5.01	4096	3	0	0	465.255	1392.74	3	1392.72	0.0176	1	18.04	240	R	TNAENEFVTIKK	D			Cmpd 95, AutoMSn(465.2548), 15.2 min
40	gi|686740899	PREDICTED: keratin, type II cytoskeletal 1 [Pongo abelii]	127	38939	18	4	5	2	13.8	5.01	4097	1	0	0	465.255	1392.74	3	1392.72	0.018	1	33.84	6.4	R	TNAENEFVTIKK	D			Cmpd 168, AutoMSn(465.2549), 15.2 min
40	gi|686740899	PREDICTED: keratin, type II cytoskeletal 1 [Pongo abelii]	127	38939	18	4	5	2	13.8	5.01	4098	1	0	0	465.256	1392.75	3	1392.72	0.0217	1	30.37	14	R	TNAENEFVTIKK	D			Cmpd 201, AutoMSn(465.2561), 15.3 min
40	gi|686740899	PREDICTED: keratin, type II cytoskeletal 1 [Pongo abelii]	127	38939	18	4	5	2	13.8	5.01	6182	1	1	1	783.156	2346.45	3	2347.23	-0.78	1	39.25	2.3	R	SLDLNSIIAEVKAQYEDIAQK	S			Cmpd 733, AutoMSn(783.1563), 29.0 min	emPAI	0.39
41	gi|586829529	5~-nucleotidase, partial [Macrovipera lebetina]	125	45002	10	5	4	2	10.5	6.45	2274	1	0	0	476.281	950.547	2	950.544	0.0034	0	66.38	0.0041	K	VGIIGYTTK	E			Cmpd 271, AutoMSn(476.2808), 17.5 min
41	gi|586829529	5~-nucleotidase, partial [Macrovipera lebetina]	125	45002	10	5	4	2	10.5	6.45	2275	1	0	0	476.281	950.548	2	950.544	0.0038	0	66.71	0.0038	K	VGIIGYTTK	E			Cmpd 266, AutoMSn(476.2810), 17.4 min
41	gi|586829529	5~-nucleotidase, partial [Macrovipera lebetina]	125	45002	10	5	4	2	10.5	6.45	2276	1	0	0	476.282	950.549	2	950.544	0.0056	0	66.55	0.0039	K	VGIIGYTTK	E			Cmpd 268, AutoMSn(476.2819), 17.4 min
41	gi|586829529	5~-nucleotidase, partial [Macrovipera lebetina]	125	45002	10	5	4	2	10.5	6.45	2412	1	0	0	513.801	1025.59	2	1025.59	0.0005	0	21.45	110	K	ASGNPILLNK	D			Cmpd 225, AutoMSn(513.8010), 16.4 min
41	gi|586829529	5~-nucleotidase, partial [Macrovipera lebetina]	125	45002	10	5	4	2	10.5	6.45	3535	1	0	0	653.864	1305.71	2	1305.71	0.0048	0	29.65	17	R	QVPVVQAYAFGK	Y			Cmpd 383, AutoMSn(653.8638), 20.0 min
41	gi|586829529	5~-nucleotidase, partial [Macrovipera lebetina]	125	45002	10	5	4	2	10.5	6.45	3536	1	0	0	653.865	1305.72	2	1305.71	0.0075	0	56.67	0.034	R	QVPVVQAYAFGK	Y			Cmpd 386, AutoMSn(653.8651), 20.1 min
41	gi|586829529	5~-nucleotidase, partial [Macrovipera lebetina]	125	45002	10	5	4	2	10.5	6.45	3537	1	0	0	653.866	1305.72	2	1305.71	0.0094	0	63.63	0.0068	R	QVPVVQAYAFGK	Y			Cmpd 389, AutoMSn(653.8661), 20.2 min
41	gi|586829529	5~-nucleotidase, partial [Macrovipera lebetina]	125	45002	10	5	4	2	10.5	6.45	4197	1	1	1	724.873	1447.73	2	1447.76	-0.0333	1	23.14	73	R	VVSLNVLCTKCR	V	2 Carbamidomethyl (C)	0.000000010010.0	Cmpd 387, AutoMSn(724.8726), 20.1 min
41	gi|586829529	5~-nucleotidase, partial [Macrovipera lebetina]	125	45002	10	5	4	2	10.5	6.45	4198	1	1	1	724.874	1447.73	2	1447.76	-0.0313	1	27.12	29	R	VVSLNVLCTKCR	V	2 Carbamidomethyl (C)	0.000000010010.0	Cmpd 384, AutoMSn(724.8736), 20.0 min
41	gi|586829529	5~-nucleotidase, partial [Macrovipera lebetina]	125	45002	10	5	4	2	10.5	6.45	4199	4	1	1	724.874	1447.73	2	1447.76	-0.0302	1	12.4	860	R	VVSLNVLCTKCR	V	2 Carbamidomethyl (C)	0.000000010010.0	Cmpd 381, AutoMSn(724.8741), 20.0 min	emPAI	0.15
42	gi|435476	cytokeratin 9 [Homo sapiens]	123	62092	27	2	6	1	16.7	5.19	2587	1	1	0	530.785	1059.56	2	1059.56	0	0	34.34	7	K	TLLDIDNTR	M			Cmpd 331, AutoMSn(530.7853), 18.8 min
42	gi|435476	cytokeratin 9 [Homo sapiens]	123	62092	27	2	6	1	16.7	5.19	2588	1	1	0	530.787	1059.56	2	1059.56	0.0038	0	30.76	40	K	TLLDIDNTR	M			Cmpd 368, AutoMSn(530.7872), 19.0 min
42	gi|435476	cytokeratin 9 [Homo sapiens]	123	62092	27	2	6	1	16.7	5.19	2589	1	1	0	530.787	1059.56	2	1059.56	0.0042	0	51.42	0.14	K	TLLDIDNTR	M			Cmpd 334, AutoMSn(530.7874), 18.9 min
42	gi|435476	cytokeratin 9 [Homo sapiens]	123	62092	27	2	6	1	16.7	5.19	2590	1	1	0	530.788	1059.56	2	1059.56	0.0047	0	58.94	0.06	K	TLLDIDNTR	M			Cmpd 366, AutoMSn(530.7876), 19.0 min
42	gi|435476	cytokeratin 9 [Homo sapiens]	123	62092	27	2	6	1	16.7	5.19	2593	1	1	0	530.789	1059.56	2	1059.56	0.0076	0	27.64	33	K	TLLDIDNTR	M			Cmpd 337, AutoMSn(530.7891), 19.0 min
42	gi|435476	cytokeratin 9 [Homo sapiens]	123	62092	27	2	6	1	16.7	5.19	2595	1	1	0	530.79	1059.56	2	1059.56	0.0087	0	39.42	2.2	K	TLLDIDNTR	M			Cmpd 222, AutoMSn(530.7896), 18.9 min
42	gi|435476	cytokeratin 9 [Homo sapiens]	123	62092	27	2	6	1	16.7	5.19	2596	1	1	0	530.79	1059.57	2	1059.56	0.0103	0	34.06	7.5	K	TLLDIDNTR	M			Cmpd 372, AutoMSn(530.7904), 19.1 min
42	gi|435476	cytokeratin 9 [Homo sapiens]	123	62092	27	2	6	1	16.7	5.19	2984	1	1	0	579.301	1156.59	2	1156.58	0.0032	0	50.68	0.14	R	QGVDADINGLR	Q			Cmpd 297, AutoMSn(579.3007), 17.4 min
42	gi|435476	cytokeratin 9 [Homo sapiens]	123	62092	27	2	6	1	16.7	5.19	2985	2	1	0	579.303	1156.59	2	1156.58	0.0075	0	32.26	9.9	R	QGVDADINGLR	Q			Cmpd 300, AutoMSn(579.3028), 17.5 min
42	gi|435476	cytokeratin 9 [Homo sapiens]	123	62092	27	2	6	1	16.7	5.19	3309	2	1	1	616.804	1231.59	2	1231.59	0.0024	0	30.52	15	R	SGGGGGGGLGSGGSIR	S			Cmpd 4, AutoMSn(616.8037), 13.2 min
42	gi|435476	cytokeratin 9 [Homo sapiens]	123	62092	27	2	6	1	16.7	5.19	3310	1	1	1	616.807	1231.6	2	1231.59	0.0092	0	30.81	14	R	SGGGGGGGLGSGGSIR	S			Cmpd 29, AutoMSn(616.8071), 13.3 min
42	gi|435476	cytokeratin 9 [Homo sapiens]	123	62092	27	2	6	1	16.7	5.19	3311	1	1	1	616.808	1231.6	2	1231.59	0.0098	0	52.29	0.099	R	SGGGGGGGLGSGGSIR	S			Cmpd 5, AutoMSn(616.8075), 13.3 min
42	gi|435476	cytokeratin 9 [Homo sapiens]	123	62092	27	2	6	1	16.7	5.19	3312	7	1	1	616.808	1231.6	2	1231.59	0.0118	0	23.29	78	R	SGGGGGGGLGSGGSIR	S			Cmpd 6, AutoMSn(616.8084), 13.3 min
42	gi|435476	cytokeratin 9 [Homo sapiens]	123	62092	27	2	6	1	16.7	5.19	3314	2	1	1	616.81	1231.61	2	1231.59	0.0147	0	25.44	48	R	SGGGGGGGLGSGGSIR	S			Cmpd 28, AutoMSn(616.8099), 13.2 min
42	gi|435476	cytokeratin 9 [Homo sapiens]	123	62092	27	2	6	1	16.7	5.19	3317	5	1	0	618.275	1234.53	2	1234.52	0.0133	0	14.34	600	R	FSSSSGYGGGSSR	V			Cmpd 44, AutoMSn(618.2747), 12.4 min
42	gi|435476	cytokeratin 9 [Homo sapiens]	123	62092	27	2	6	1	16.7	5.19	6398	4	1	1	837.387	2509.14	3	2509.12	0.0139	0	21.36	77	K	EIETYHNLLEGGQEDFESSGAGK	I			Cmpd 388, AutoMSn(837.3867), 20.1 min
42	gi|435476	cytokeratin 9 [Homo sapiens]	123	62092	27	2	6	1	16.7	5.19	6461	1	1	1	902.39	2704.15	3	2704.15	-0.0065	0	36.51	2.7	R	GGGGSFGYSYGGGSGGGFSASSLGGGFGGGSR	G			Cmpd 371, AutoMSn(902.3897), 21.9 min
42	gi|435476	cytokeratin 9 [Homo sapiens]	123	62092	27	2	6	1	16.7	5.19	6463	1	1	1	902.396	2704.17	3	2704.15	0.0123	0	67.85	0.0019	R	GGGGSFGYSYGGGSGGGFSASSLGGGFGGGSR	G			Cmpd 463, AutoMSn(902.3960), 21.9 min
42	gi|435476	cytokeratin 9 [Homo sapiens]	123	62092	27	2	6	1	16.7	5.19	6465	1	1	1	902.398	2704.17	3	2704.15	0.0183	0	48.44	0.17	R	GGGGSFGYSYGGGSGGGFSASSLGGGFGGGSR	G			Cmpd 497, AutoMSn(902.3980), 22.0 min
42	gi|435476	cytokeratin 9 [Homo sapiens]	123	62092	27	2	6	1	16.7	5.19	6466	1	1	1	902.399	2704.17	3	2704.15	0.0209	0	63.48	0.0052	R	GGGGSFGYSYGGGSGGGFSASSLGGGFGGGSR	G			Cmpd 464, AutoMSn(902.3989), 21.9 min
42	gi|435476	cytokeratin 9 [Homo sapiens]	123	62092	27	2	6	1	16.7	5.19	6467	1	1	1	902.4	2704.18	3	2704.15	0.0236	0	51.65	0.078	R	GGGGSFGYSYGGGSGGGFSASSLGGGFGGGSR	G			Cmpd 499, AutoMSn(902.3998), 22.0 min
42	gi|435476	cytokeratin 9 [Homo sapiens]	123	62092	27	2	6	1	16.7	5.19	6468	1	1	1	902.4	2704.18	3	2704.15	0.0245	0	45.01	0.36	R	GGGGSFGYSYGGGSGGGFSASSLGGGFGGGSR	G			Cmpd 504, AutoMSn(902.4001), 22.1 min
42	gi|435476	cytokeratin 9 [Homo sapiens]	123	62092	27	2	6	1	16.7	5.19	6470	7	1	1	902.403	2704.19	3	2704.15	0.034	0	17.78	190	R	GGGGSFGYSYGGGSGGGFSASSLGGGFGGGSR	G			Cmpd 372, AutoMSn(902.4032), 21.9 min
42	gi|435476	cytokeratin 9 [Homo sapiens]	123	62092	27	2	6	1	16.7	5.19	6471	1	1	1	902.404	2704.19	3	2704.15	0.0355	0	24.26	42	R	GGGGSFGYSYGGGSGGGFSASSLGGGFGGGSR	G			Cmpd 307, AutoMSn(902.4038), 22.0 min
42	gi|435476	cytokeratin 9 [Homo sapiens]	123	62092	27	2	6	1	16.7	5.19	6473	1	1	1	902.406	2704.2	3	2704.15	0.0432	0	35.85	2.9	R	GGGGSFGYSYGGGSGGGFSASSLGGGFGGGSR	G			Cmpd 309, AutoMSn(902.4063), 22.0 min
42	gi|435476	cytokeratin 9 [Homo sapiens]	123	62092	27	2	6	1	16.7	5.19	6474	5	1	1	902.407	2704.2	3	2704.15	0.0465	0	21.83	72	R	GGGGSFGYSYGGGSGGGFSASSLGGGFGGGSR	G			Cmpd 145, AutoMSn(902.4074), 22.0 min
42	gi|435476	cytokeratin 9 [Homo sapiens]	123	62092	27	2	6	1	16.7	5.19	6475	1	1	1	902.409	2704.21	3	2704.15	0.0512	0	33.91	4.4	R	GGGGSFGYSYGGGSGGGFSASSLGGGFGGGSR	G			Cmpd 306, AutoMSn(902.4090), 21.9 min	emPAI	0.23
43	gi|403304671	PREDICTED: keratin, type I cytoskeletal 9 [Saimiri boliviensis boliviensis]	112	62408	21	2	4	1	10.4	4.96	2587	1	0	0	530.785	1059.56	2	1059.56	0	0	34.34	7	K	TLLDIDNTR	M			Cmpd 331, AutoMSn(530.7853), 18.8 min
43	gi|403304671	PREDICTED: keratin, type I cytoskeletal 9 [Saimiri boliviensis boliviensis]	112	62408	21	2	4	1	10.4	4.96	2588	1	0	0	530.787	1059.56	2	1059.56	0.0038	0	30.76	40	K	TLLDIDNTR	M			Cmpd 368, AutoMSn(530.7872), 19.0 min
43	gi|403304671	PREDICTED: keratin, type I cytoskeletal 9 [Saimiri boliviensis boliviensis]	112	62408	21	2	4	1	10.4	4.96	2589	1	0	0	530.787	1059.56	2	1059.56	0.0042	0	51.42	0.14	K	TLLDIDNTR	M			Cmpd 334, AutoMSn(530.7874), 18.9 min
43	gi|403304671	PREDICTED: keratin, type I cytoskeletal 9 [Saimiri boliviensis boliviensis]	112	62408	21	2	4	1	10.4	4.96	2590	1	0	0	530.788	1059.56	2	1059.56	0.0047	0	58.94	0.06	K	TLLDIDNTR	M			Cmpd 366, AutoMSn(530.7876), 19.0 min
43	gi|403304671	PREDICTED: keratin, type I cytoskeletal 9 [Saimiri boliviensis boliviensis]	112	62408	21	2	4	1	10.4	4.96	2593	1	0	0	530.789	1059.56	2	1059.56	0.0076	0	27.64	33	K	TLLDIDNTR	M			Cmpd 337, AutoMSn(530.7891), 19.0 min
43	gi|403304671	PREDICTED: keratin, type I cytoskeletal 9 [Saimiri boliviensis boliviensis]	112	62408	21	2	4	1	10.4	4.96	2595	1	0	0	530.79	1059.56	2	1059.56	0.0087	0	39.42	2.2	K	TLLDIDNTR	M			Cmpd 222, AutoMSn(530.7896), 18.9 min
43	gi|403304671	PREDICTED: keratin, type I cytoskeletal 9 [Saimiri boliviensis boliviensis]	112	62408	21	2	4	1	10.4	4.96	2596	1	0	0	530.79	1059.57	2	1059.56	0.0103	0	34.06	7.5	K	TLLDIDNTR	M			Cmpd 372, AutoMSn(530.7904), 19.1 min
43	gi|403304671	PREDICTED: keratin, type I cytoskeletal 9 [Saimiri boliviensis boliviensis]	112	62408	21	2	4	1	10.4	4.96	2984	1	0	0	579.301	1156.59	2	1156.58	0.0032	0	50.68	0.14	R	QGVDADINGLR	Q			Cmpd 297, AutoMSn(579.3007), 17.4 min
43	gi|403304671	PREDICTED: keratin, type I cytoskeletal 9 [Saimiri boliviensis boliviensis]	112	62408	21	2	4	1	10.4	4.96	2985	2	0	0	579.303	1156.59	2	1156.58	0.0075	0	32.26	9.9	R	QGVDADINGLR	Q			Cmpd 300, AutoMSn(579.3028), 17.5 min
43	gi|403304671	PREDICTED: keratin, type I cytoskeletal 9 [Saimiri boliviensis boliviensis]	112	62408	21	2	4	1	10.4	4.96	3317	5	0	0	618.275	1234.53	2	1234.52	0.0133	0	14.34	600	R	FSSSSGYGGGSSR	V			Cmpd 44, AutoMSn(618.2747), 12.4 min
43	gi|403304671	PREDICTED: keratin, type I cytoskeletal 9 [Saimiri boliviensis boliviensis]	112	62408	21	2	4	1	10.4	4.96	6461	1	0	1	902.39	2704.15	3	2704.15	-0.0065	0	36.51	2.7	R	GGGGSFGYSYGGGSGGGFSASSIGGGFGGGSR	S			Cmpd 371, AutoMSn(902.3897), 21.9 min
43	gi|403304671	PREDICTED: keratin, type I cytoskeletal 9 [Saimiri boliviensis boliviensis]	112	62408	21	2	4	1	10.4	4.96	6463	1	0	1	902.396	2704.17	3	2704.15	0.0123	0	67.85	0.0019	R	GGGGSFGYSYGGGSGGGFSASSIGGGFGGGSR	S			Cmpd 463, AutoMSn(902.3960), 21.9 min
43	gi|403304671	PREDICTED: keratin, type I cytoskeletal 9 [Saimiri boliviensis boliviensis]	112	62408	21	2	4	1	10.4	4.96	6465	1	0	1	902.398	2704.17	3	2704.15	0.0183	0	48.44	0.17	R	GGGGSFGYSYGGGSGGGFSASSIGGGFGGGSR	S			Cmpd 497, AutoMSn(902.3980), 22.0 min
43	gi|403304671	PREDICTED: keratin, type I cytoskeletal 9 [Saimiri boliviensis boliviensis]	112	62408	21	2	4	1	10.4	4.96	6466	1	0	1	902.399	2704.17	3	2704.15	0.0209	0	63.48	0.0052	R	GGGGSFGYSYGGGSGGGFSASSIGGGFGGGSR	S			Cmpd 464, AutoMSn(902.3989), 21.9 min
43	gi|403304671	PREDICTED: keratin, type I cytoskeletal 9 [Saimiri boliviensis boliviensis]	112	62408	21	2	4	1	10.4	4.96	6467	1	0	1	902.4	2704.18	3	2704.15	0.0236	0	51.65	0.078	R	GGGGSFGYSYGGGSGGGFSASSIGGGFGGGSR	S			Cmpd 499, AutoMSn(902.3998), 22.0 min
43	gi|403304671	PREDICTED: keratin, type I cytoskeletal 9 [Saimiri boliviensis boliviensis]	112	62408	21	2	4	1	10.4	4.96	6468	1	0	1	902.4	2704.18	3	2704.15	0.0245	0	45.01	0.36	R	GGGGSFGYSYGGGSGGGFSASSIGGGFGGGSR	S			Cmpd 504, AutoMSn(902.4001), 22.1 min
43	gi|403304671	PREDICTED: keratin, type I cytoskeletal 9 [Saimiri boliviensis boliviensis]	112	62408	21	2	4	1	10.4	4.96	6470	7	0	1	902.403	2704.19	3	2704.15	0.034	0	17.78	190	R	GGGGSFGYSYGGGSGGGFSASSIGGGFGGGSR	S			Cmpd 372, AutoMSn(902.4032), 21.9 min
43	gi|403304671	PREDICTED: keratin, type I cytoskeletal 9 [Saimiri boliviensis boliviensis]	112	62408	21	2	4	1	10.4	4.96	6471	1	0	1	902.404	2704.19	3	2704.15	0.0355	0	24.26	42	R	GGGGSFGYSYGGGSGGGFSASSIGGGFGGGSR	S			Cmpd 307, AutoMSn(902.4038), 22.0 min
43	gi|403304671	PREDICTED: keratin, type I cytoskeletal 9 [Saimiri boliviensis boliviensis]	112	62408	21	2	4	1	10.4	4.96	6473	1	0	1	902.406	2704.2	3	2704.15	0.0432	0	35.85	2.9	R	GGGGSFGYSYGGGSGGGFSASSIGGGFGGGSR	S			Cmpd 309, AutoMSn(902.4063), 22.0 min
43	gi|403304671	PREDICTED: keratin, type I cytoskeletal 9 [Saimiri boliviensis boliviensis]	112	62408	21	2	4	1	10.4	4.96	6474	5	0	1	902.407	2704.2	3	2704.15	0.0465	0	21.83	72	R	GGGGSFGYSYGGGSGGGFSASSIGGGFGGGSR	S			Cmpd 145, AutoMSn(902.4074), 22.0 min
43	gi|403304671	PREDICTED: keratin, type I cytoskeletal 9 [Saimiri boliviensis boliviensis]	112	62408	21	2	4	1	10.4	4.96	6475	1	0	1	902.409	2704.21	3	2704.15	0.0512	0	33.91	4.4	R	GGGGSFGYSYGGGSGGGFSASSIGGGFGGGSR	S			Cmpd 306, AutoMSn(902.4090), 21.9 min	emPAI	0.17
44	gi|119892108	PREDICTED: keratin, type II cytoskeletal 2 epidermal isoform X1 [Bos taurus]	112	64271	9	2	4	1	6.5	8.57	2470	1	0	0	521.283	1040.55	2	1040.55	0.0018	0	21.41	110	K	VDPEIQNVK	S			Cmpd 186, AutoMSn(521.2833), 14.9 min
44	gi|119892108	PREDICTED: keratin, type II cytoskeletal 2 epidermal isoform X1 [Bos taurus]	112	64271	9	2	4	1	6.5	8.57	2471	1	0	0	521.287	1040.56	2	1040.55	0.0093	0	21.59	100	K	VDPEIQNVK	S			Cmpd 189, AutoMSn(521.2870), 15.0 min
44	gi|119892108	PREDICTED: keratin, type II cytoskeletal 2 epidermal isoform X1 [Bos taurus]	112	64271	9	2	4	1	6.5	8.57	2785	1	0	0	554.276	1106.54	2	1106.54	0.0022	0	27.05	35	R	AQYEEIAQR	S			Cmpd 131, AutoMSn(554.2762), 14.3 min
44	gi|119892108	PREDICTED: keratin, type II cytoskeletal 2 epidermal isoform X1 [Bos taurus]	112	64271	9	2	4	1	6.5	8.57	2786	1	0	0	554.277	1106.54	2	1106.54	0.0038	0	41.08	1.4	R	AQYEEIAQR	S			Cmpd 157, AutoMSn(554.2770), 14.3 min
44	gi|119892108	PREDICTED: keratin, type II cytoskeletal 2 epidermal isoform X1 [Bos taurus]	112	64271	9	2	4	1	6.5	8.57	3089	6	0	1	590.307	1178.6	2	1178.63	-0.0303	1	22.54	91	K	YEELRITAGK	H			Cmpd 302, AutoMSn(590.3069), 17.6 min
44	gi|119892108	PREDICTED: keratin, type II cytoskeletal 2 epidermal isoform X1 [Bos taurus]	112	64271	9	2	4	1	6.5	8.57	4283	1	0	0	738.398	1474.78	2	1474.78	0.0035	0	70.68	0.0013	R	FLEQQNQVLQTK	W			Cmpd 272, AutoMSn(738.3980), 17.5 min
44	gi|119892108	PREDICTED: keratin, type II cytoskeletal 2 epidermal isoform X1 [Bos taurus]	112	64271	9	2	4	1	6.5	8.57	4285	1	0	0	738.401	1474.79	2	1474.78	0.009	0	50.71	0.13	R	FLEQQNQVLQTK	W			Cmpd 275, AutoMSn(738.4008), 17.6 min
44	gi|119892108	PREDICTED: keratin, type II cytoskeletal 2 epidermal isoform X1 [Bos taurus]	112	64271	9	2	4	1	6.5	8.57	4286	1	0	0	738.401	1474.79	2	1474.78	0.0091	0	83.5	6.8e-05	R	FLEQQNQVLQTK	W			Cmpd 301, AutoMSn(738.4008), 17.6 min
44	gi|119892108	PREDICTED: keratin, type II cytoskeletal 2 epidermal isoform X1 [Bos taurus]	112	64271	9	2	4	1	6.5	8.57	4287	6	0	0	738.401	1474.79	2	1474.78	0.0093	0	16.59	340	R	FLEQQNQVLQTK	W			Cmpd 186, AutoMSn(738.4009), 17.5 min	emPAI	0.1
45	gi|471413767	PREDICTED: LOW QUALITY PROTEIN: keratin 2 [Trichechus manatus latirostris]	112	64693	10	2	4	1	4.2	5.9	4283	1	0	0	738.398	1474.78	2	1474.78	0.0035	0	70.68	0.0013	R	FLEQQNQVLQTK	W			Cmpd 272, AutoMSn(738.3980), 17.5 min
45	gi|471413767	PREDICTED: LOW QUALITY PROTEIN: keratin 2 [Trichechus manatus latirostris]	112	64693	10	2	4	1	4.2	5.9	4285	1	0	0	738.401	1474.79	2	1474.78	0.009	0	50.71	0.13	R	FLEQQNQVLQTK	W			Cmpd 275, AutoMSn(738.4008), 17.6 min
45	gi|471413767	PREDICTED: LOW QUALITY PROTEIN: keratin 2 [Trichechus manatus latirostris]	112	64693	10	2	4	1	4.2	5.9	4286	1	0	0	738.401	1474.79	2	1474.78	0.0091	0	83.5	6.8e-05	R	FLEQQNQVLQTK	W			Cmpd 301, AutoMSn(738.4008), 17.6 min
45	gi|471413767	PREDICTED: LOW QUALITY PROTEIN: keratin 2 [Trichechus manatus latirostris]	112	64693	10	2	4	1	4.2	5.9	4287	6	0	0	738.401	1474.79	2	1474.78	0.0093	0	16.59	340	R	FLEQQNQVLQTK	W			Cmpd 186, AutoMSn(738.4009), 17.5 min
45	gi|471413767	PREDICTED: LOW QUALITY PROTEIN: keratin 2 [Trichechus manatus latirostris]	112	64693	10	2	4	1	4.2	5.9	4683	2	0	1	546.733	1637.18	3	1636.89	0.2824	1	22.56	150	K	TLNNIFASFIDKVR	F			Cmpd 471, AutoMSn(546.7326), 21.4 min
45	gi|471413767	PREDICTED: LOW QUALITY PROTEIN: keratin 2 [Trichechus manatus latirostris]	112	64693	10	2	4	1	4.2	5.9	4686	2	0	1	546.96	1637.86	3	1637.85	0.0056	1	23.17	68	K	TLNNNFASFIDKVR	F			Cmpd 472, AutoMSn(546.9600), 21.4 min
45	gi|471413767	PREDICTED: LOW QUALITY PROTEIN: keratin 2 [Trichechus manatus latirostris]	112	64693	10	2	4	1	4.2	5.9	4688	2	0	1	546.963	1637.87	3	1637.85	0.0152	1	34.46	5.1	K	TLNNNFASFIDKVR	F			Cmpd 439, AutoMSn(546.9632), 21.3 min
45	gi|471413767	PREDICTED: LOW QUALITY PROTEIN: keratin 2 [Trichechus manatus latirostris]	112	64693	10	2	4	1	4.2	5.9	4689	3	0	1	546.964	1637.87	3	1637.85	0.0185	1	16.64	310	K	TLNNNFASFIDKVR	F			Cmpd 477, AutoMSn(546.9643), 21.5 min
45	gi|471413767	PREDICTED: LOW QUALITY PROTEIN: keratin 2 [Trichechus manatus latirostris]	112	64693	10	2	4	1	4.2	5.9	4693	9	0	1	546.966	1637.88	3	1637.85	0.0251	1	17.72	240	K	TLNNNFASFIDKVR	F			Cmpd 285, AutoMSn(546.9665), 21.3 min
45	gi|471413767	PREDICTED: LOW QUALITY PROTEIN: keratin 2 [Trichechus manatus latirostris]	112	64693	10	2	4	1	4.2	5.9	4694	3	0	1	547.154	1638.44	3	1638.84	-0.3974	1	31.56	19	K	TLNNDFASFIDKVR	F			Cmpd 442, AutoMSn(547.1536), 21.4 min	emPAI	0.05
46	gi|532078558	PREDICTED: keratin, type II cytoskeletal 2 epidermal isoform X1 [Ictidomys tridecemlineatus]	112	70352	8	2	4	1	7	7.07	1854	1	0	0	416.252	830.489	2	830.486	0.0025	0	30.27	20	R	SLVGLGGTK	S			Cmpd 239, AutoMSn(416.2516), 16.2 min
46	gi|532078558	PREDICTED: keratin, type II cytoskeletal 2 epidermal isoform X1 [Ictidomys tridecemlineatus]	112	70352	8	2	4	1	7	7.07	2470	1	0	0	521.283	1040.55	2	1040.55	0.0018	0	21.41	110	K	VDPEIQNVK	S			Cmpd 186, AutoMSn(521.2833), 14.9 min
46	gi|532078558	PREDICTED: keratin, type II cytoskeletal 2 epidermal isoform X1 [Ictidomys tridecemlineatus]	112	70352	8	2	4	1	7	7.07	2471	1	0	0	521.287	1040.56	2	1040.55	0.0093	0	21.59	100	K	VDPEIQNVK	S			Cmpd 189, AutoMSn(521.2870), 15.0 min
46	gi|532078558	PREDICTED: keratin, type II cytoskeletal 2 epidermal isoform X1 [Ictidomys tridecemlineatus]	112	70352	8	2	4	1	7	7.07	4283	1	0	0	738.398	1474.78	2	1474.78	0.0035	0	70.68	0.0013	R	FLEQQNQVLQTK	W			Cmpd 272, AutoMSn(738.3980), 17.5 min
46	gi|532078558	PREDICTED: keratin, type II cytoskeletal 2 epidermal isoform X1 [Ictidomys tridecemlineatus]	112	70352	8	2	4	1	7	7.07	4285	1	0	0	738.401	1474.79	2	1474.78	0.009	0	50.71	0.13	R	FLEQQNQVLQTK	W			Cmpd 275, AutoMSn(738.4008), 17.6 min
46	gi|532078558	PREDICTED: keratin, type II cytoskeletal 2 epidermal isoform X1 [Ictidomys tridecemlineatus]	112	70352	8	2	4	1	7	7.07	4286	1	0	0	738.401	1474.79	2	1474.78	0.0091	0	83.5	6.8e-05	R	FLEQQNQVLQTK	W			Cmpd 301, AutoMSn(738.4008), 17.6 min
46	gi|532078558	PREDICTED: keratin, type II cytoskeletal 2 epidermal isoform X1 [Ictidomys tridecemlineatus]	112	70352	8	2	4	1	7	7.07	4287	6	0	0	738.401	1474.79	2	1474.78	0.0093	0	16.59	340	R	FLEQQNQVLQTK	W			Cmpd 186, AutoMSn(738.4009), 17.5 min
46	gi|532078558	PREDICTED: keratin, type II cytoskeletal 2 epidermal isoform X1 [Ictidomys tridecemlineatus]	112	70352	8	2	4	1	7	7.07	6071	3	1	1	752.69	2255.05	3	2255.04	0.0106	1	25.64	31	R	TSQNSELNNMQDLVEDFKK	K	Oxidation (M)	0.0000000002000000000.0	Cmpd 401, AutoMSn(752.6900), 19.8 min	emPAI	0.05
47	gi|505774290	PREDICTED: keratin, type II cytoskeletal 2 epidermal [Sorex araneus]	112	58008	8	2	3	1	5.6	5.56	2470	1	0	0	521.283	1040.55	2	1040.55	0.0018	0	21.41	110	K	VDPEIQNVK	S			Cmpd 186, AutoMSn(521.2833), 14.9 min
47	gi|505774290	PREDICTED: keratin, type II cytoskeletal 2 epidermal [Sorex araneus]	112	58008	8	2	3	1	5.6	5.56	2471	1	0	0	521.287	1040.56	2	1040.55	0.0093	0	21.59	100	K	VDPEIQNVK	S			Cmpd 189, AutoMSn(521.2870), 15.0 min
47	gi|505774290	PREDICTED: keratin, type II cytoskeletal 2 epidermal [Sorex araneus]	112	58008	8	2	3	1	5.6	5.56	3087	1	0	0	590.305	1178.59	2	1178.62	-0.0236	0	21.63	110	K	YEELQVTAVK	H			Cmpd 273, AutoMSn(590.3046), 17.5 min
47	gi|505774290	PREDICTED: keratin, type II cytoskeletal 2 epidermal [Sorex araneus]	112	58008	8	2	3	1	5.6	5.56	3089	4	0	0	590.307	1178.6	2	1178.62	-0.0191	0	35.4	4.7	K	YEELQVTAVK	H			Cmpd 302, AutoMSn(590.3069), 17.6 min
47	gi|505774290	PREDICTED: keratin, type II cytoskeletal 2 epidermal [Sorex araneus]	112	58008	8	2	3	1	5.6	5.56	4283	1	0	0	738.398	1474.78	2	1474.78	0.0035	0	70.68	0.0013	R	FLEQQNQVLQTK	W			Cmpd 272, AutoMSn(738.3980), 17.5 min
47	gi|505774290	PREDICTED: keratin, type II cytoskeletal 2 epidermal [Sorex araneus]	112	58008	8	2	3	1	5.6	5.56	4285	1	0	0	738.401	1474.79	2	1474.78	0.009	0	50.71	0.13	R	FLEQQNQVLQTK	W			Cmpd 275, AutoMSn(738.4008), 17.6 min
47	gi|505774290	PREDICTED: keratin, type II cytoskeletal 2 epidermal [Sorex araneus]	112	58008	8	2	3	1	5.6	5.56	4286	1	0	0	738.401	1474.79	2	1474.78	0.0091	0	83.5	6.8e-05	R	FLEQQNQVLQTK	W			Cmpd 301, AutoMSn(738.4008), 17.6 min
47	gi|505774290	PREDICTED: keratin, type II cytoskeletal 2 epidermal [Sorex araneus]	112	58008	8	2	3	1	5.6	5.56	4287	6	0	0	738.401	1474.79	2	1474.78	0.0093	0	16.59	340	R	FLEQQNQVLQTK	W			Cmpd 186, AutoMSn(738.4009), 17.5 min	emPAI	0.06
48	gi|565315186	Keratin, type II cytoskeletal 1, partial [Ophiophagus hannah]	112	240496	10	2	3	1	1.3	6.24	2612	1	0	0	533.268	1064.52	2	1064.51	0.0074	0	27.36	31	K	AQYEDIAQK	S			Cmpd 140, AutoMSn(533.2679), 13.9 min
48	gi|565315186	Keratin, type II cytoskeletal 1, partial [Ophiophagus hannah]	112	240496	10	2	3	1	1.3	6.24	2613	1	0	0	533.268	1064.52	2	1064.51	0.0075	0	29.82	17	K	AQYEDIAQK	S			Cmpd 109, AutoMSn(533.2679), 13.8 min
48	gi|565315186	Keratin, type II cytoskeletal 1, partial [Ophiophagus hannah]	112	240496	10	2	3	1	1.3	6.24	2614	1	0	0	533.269	1064.52	2	1064.51	0.0085	0	25.16	51	K	AQYEDIAQK	S			Cmpd 113, AutoMSn(533.2684), 13.9 min
48	gi|565315186	Keratin, type II cytoskeletal 1, partial [Ophiophagus hannah]	112	240496	10	2	3	1	1.3	6.24	2615	4	0	0	533.269	1064.52	2	1064.51	0.0102	0	12.78	870	K	AQYEDIAQK	S			Cmpd 55, AutoMSn(533.2693), 13.9 min
48	gi|565315186	Keratin, type II cytoskeletal 1, partial [Ophiophagus hannah]	112	240496	10	2	3	1	1.3	6.24	3173	4	1	1	398.878	1193.61	3	1193.57	0.0436	1	16.91	320	R	KYEDEINQR	T			Cmpd 4, AutoMSn(398.8777), 10.8 min
48	gi|565315186	Keratin, type II cytoskeletal 1, partial [Ophiophagus hannah]	112	240496	10	2	3	1	1.3	6.24	3174	1	1	1	398.879	1193.61	3	1193.57	0.0472	1	26.64	34	R	KYEDEINQR	T			Cmpd 3, AutoMSn(398.8789), 10.7 min
48	gi|565315186	Keratin, type II cytoskeletal 1, partial [Ophiophagus hannah]	112	240496	10	2	3	1	1.3	6.24	4283	1	0	0	738.398	1474.78	2	1474.81	-0.0328	1	70.68	0.0013	R	FLEQQNKVLQTK	W			Cmpd 272, AutoMSn(738.3980), 17.5 min
48	gi|565315186	Keratin, type II cytoskeletal 1, partial [Ophiophagus hannah]	112	240496	10	2	3	1	1.3	6.24	4285	1	0	0	738.401	1474.79	2	1474.81	-0.0273	1	50.71	0.13	R	FLEQQNKVLQTK	W			Cmpd 275, AutoMSn(738.4008), 17.6 min
48	gi|565315186	Keratin, type II cytoskeletal 1, partial [Ophiophagus hannah]	112	240496	10	2	3	1	1.3	6.24	4286	1	0	0	738.401	1474.79	2	1474.81	-0.0273	1	83.5	6.8e-05	R	FLEQQNKVLQTK	W			Cmpd 301, AutoMSn(738.4008), 17.6 min
48	gi|565315186	Keratin, type II cytoskeletal 1, partial [Ophiophagus hannah]	112	240496	10	2	3	1	1.3	6.24	4287	6	0	0	738.401	1474.79	2	1474.81	-0.027	1	16.59	340	R	FLEQQNKVLQTK	W			Cmpd 186, AutoMSn(738.4009), 17.5 min	emPAI	0.01
49	gi|545825417	PREDICTED: keratin, type II cytoskeletal 78 [Sus scrofa]	112	44531	8	2	2	1	5.8	9.34	4283	1	0	0	738.398	1474.78	2	1474.78	0.0035	0	70.68	0.0013	R	FLEQQNQVLQTK	W			Cmpd 272, AutoMSn(738.3980), 17.5 min
49	gi|545825417	PREDICTED: keratin, type II cytoskeletal 78 [Sus scrofa]	112	44531	8	2	2	1	5.8	9.34	4285	1	0	0	738.401	1474.79	2	1474.78	0.009	0	50.71	0.13	R	FLEQQNQVLQTK	W			Cmpd 275, AutoMSn(738.4008), 17.6 min
49	gi|545825417	PREDICTED: keratin, type II cytoskeletal 78 [Sus scrofa]	112	44531	8	2	2	1	5.8	9.34	4286	1	0	0	738.401	1474.79	2	1474.78	0.0091	0	83.5	6.8e-05	R	FLEQQNQVLQTK	W			Cmpd 301, AutoMSn(738.4008), 17.6 min
49	gi|545825417	PREDICTED: keratin, type II cytoskeletal 78 [Sus scrofa]	112	44531	8	2	2	1	5.8	9.34	4287	6	0	0	738.401	1474.79	2	1474.78	0.0093	0	16.59	340	R	FLEQQNQVLQTK	W			Cmpd 186, AutoMSn(738.4009), 17.5 min
49	gi|545825417	PREDICTED: keratin, type II cytoskeletal 78 [Sus scrofa]	112	44531	8	2	2	1	5.8	9.34	4371	7	1	0	757.856	1513.7	2	1513.64	0.062	1	13.71	600	K	SCQDQEEEYKAK	Y	Carbamidomethyl (C)	0.010000000000.0	Cmpd 623, AutoMSn(757.8560), 24.3 min
49	gi|545825417	PREDICTED: keratin, type II cytoskeletal 78 [Sus scrofa]	112	44531	8	2	2	1	5.8	9.34	4372	9	1	0	757.856	1513.7	2	1513.64	0.0629	1	16.05	350	K	SCQDQEEEYKAK	Y	Carbamidomethyl (C)	0.010000000000.0	Cmpd 592, AutoMSn(757.8564), 24.3 min
49	gi|545825417	PREDICTED: keratin, type II cytoskeletal 78 [Sus scrofa]	112	44531	8	2	2	1	5.8	9.34	4374	4	1	0	757.858	1513.7	2	1513.64	0.0657	1	22.7	75	K	SCQDQEEEYKAK	Y	Carbamidomethyl (C)	0.010000000000.0	Cmpd 592, AutoMSn(757.8579), 24.3 min
49	gi|545825417	PREDICTED: keratin, type II cytoskeletal 78 [Sus scrofa]	112	44531	8	2	2	1	5.8	9.34	4375	2	1	0	757.859	1513.7	2	1513.64	0.0682	1	27.22	27	K	SCQDQEEEYKAK	Y	Carbamidomethyl (C)	0.010000000000.0	Cmpd 545, AutoMSn(757.8591), 24.3 min	emPAI	0.07
50	gi|348581125	PREDICTED: keratin, type II cytoskeletal 73 [Cavia porcellus]	112	58949	5	2	2	1	6.1	6.97	4283	1	0	0	738.398	1474.78	2	1474.78	0.0035	0	70.68	0.0013	R	FLEQQNQVLQTK	W			Cmpd 272, AutoMSn(738.3980), 17.5 min
50	gi|348581125	PREDICTED: keratin, type II cytoskeletal 73 [Cavia porcellus]	112	58949	5	2	2	1	6.1	6.97	4285	1	0	0	738.401	1474.79	2	1474.78	0.009	0	50.71	0.13	R	FLEQQNQVLQTK	W			Cmpd 275, AutoMSn(738.4008), 17.6 min
50	gi|348581125	PREDICTED: keratin, type II cytoskeletal 73 [Cavia porcellus]	112	58949	5	2	2	1	6.1	6.97	4286	1	0	0	738.401	1474.79	2	1474.78	0.0091	0	83.5	6.8e-05	R	FLEQQNQVLQTK	W			Cmpd 301, AutoMSn(738.4008), 17.6 min
50	gi|348581125	PREDICTED: keratin, type II cytoskeletal 73 [Cavia porcellus]	112	58949	5	2	2	1	6.1	6.97	4287	6	0	0	738.401	1474.79	2	1474.78	0.0093	0	16.59	340	R	FLEQQNQVLQTK	W			Cmpd 186, AutoMSn(738.4009), 17.5 min
50	gi|348581125	PREDICTED: keratin, type II cytoskeletal 73 [Cavia porcellus]	112	58949	5	2	2	1	6.1	6.97	6288	9	1	1	807.098	2418.27	3	2418.26	0.0087	1	22.18	70	R	NLDLDSIITEVRAQYEDIALK	S			Cmpd 744, AutoMSn(807.0983), 29.7 min	emPAI	0.06
51	gi|586479054	PREDICTED: keratin, type II cytoskeletal 2 epidermal [Chrysochloris asiatica]	112	66655	6	2	2	1	3.2	6.71	2470	1	0	0	521.283	1040.55	2	1040.55	0.0018	0	21.41	110	K	VDPEIQNVK	S			Cmpd 186, AutoMSn(521.2833), 14.9 min
51	gi|586479054	PREDICTED: keratin, type II cytoskeletal 2 epidermal [Chrysochloris asiatica]	112	66655	6	2	2	1	3.2	6.71	2471	1	0	0	521.287	1040.56	2	1040.55	0.0093	0	21.59	100	K	VDPEIQNVK	S			Cmpd 189, AutoMSn(521.2870), 15.0 min
51	gi|586479054	PREDICTED: keratin, type II cytoskeletal 2 epidermal [Chrysochloris asiatica]	112	66655	6	2	2	1	3.2	6.71	4283	1	0	0	738.398	1474.78	2	1474.81	-0.0328	1	70.68	0.0013	R	FLEQQNQVLKTK	W			Cmpd 272, AutoMSn(738.3980), 17.5 min
51	gi|586479054	PREDICTED: keratin, type II cytoskeletal 2 epidermal [Chrysochloris asiatica]	112	66655	6	2	2	1	3.2	6.71	4285	1	0	0	738.401	1474.79	2	1474.81	-0.0273	1	50.71	0.13	R	FLEQQNQVLKTK	W			Cmpd 275, AutoMSn(738.4008), 17.6 min
51	gi|586479054	PREDICTED: keratin, type II cytoskeletal 2 epidermal [Chrysochloris asiatica]	112	66655	6	2	2	1	3.2	6.71	4286	1	0	0	738.401	1474.79	2	1474.81	-0.0273	1	83.5	6.8e-05	R	FLEQQNQVLKTK	W			Cmpd 301, AutoMSn(738.4008), 17.6 min
51	gi|586479054	PREDICTED: keratin, type II cytoskeletal 2 epidermal [Chrysochloris asiatica]	112	66655	6	2	2	1	3.2	6.71	4287	6	0	0	738.401	1474.79	2	1474.81	-0.027	1	16.59	340	R	FLEQQNQVLKTK	W			Cmpd 186, AutoMSn(738.4009), 17.5 min	emPAI	0.05
52	gi|558160607	PREDICTED: keratin, type II cytoskeletal 8-like [Pelodiscus sinensis]	112	38116	3	2	1	1	3.6	6.69	4283	1	0	1	738.398	1474.78	2	1474.78	0.0002	1	70.68	0.0013	R	MLEQQNQVLKTK	W	Oxidation (M)	0.200000000000.0	Cmpd 272, AutoMSn(738.3980), 17.5 min
52	gi|558160607	PREDICTED: keratin, type II cytoskeletal 8-like [Pelodiscus sinensis]	112	38116	3	2	1	1	3.6	6.69	4285	1	0	1	738.401	1474.79	2	1474.78	0.0057	1	50.71	0.13	R	MLEQQNQVLKTK	W	Oxidation (M)	0.200000000000.0	Cmpd 275, AutoMSn(738.4008), 17.6 min
52	gi|558160607	PREDICTED: keratin, type II cytoskeletal 8-like [Pelodiscus sinensis]	112	38116	3	2	1	1	3.6	6.69	4286	1	0	1	738.401	1474.79	2	1474.78	0.0057	1	83.5	6.8e-05	R	MLEQQNQVLKTK	W	Oxidation (M)	0.200000000000.0	Cmpd 301, AutoMSn(738.4008), 17.6 min	emPAI	0.09
53	gi|67462321	RecName: Full=Disintegrin trigramin-gamma; AltName: Full=Platelet aggregation activation inhibitor [Trimeresurus gramineus]	111	7568	7	2	2	1	28.8	4.61	6158	1	1	1	1165.99	2329.97	2	2329.96	0.0106	0	22.61	74	K	LLPGAQCGEGLCCDQCSFMK	K	4 Carbamidomethyl (C)	0.00000010000110010000.0	Cmpd 470, AutoMSn(1165.9937), 20.7 min
53	gi|67462321	RecName: Full=Disintegrin trigramin-gamma; AltName: Full=Platelet aggregation activation inhibitor [Trimeresurus gramineus]	111	7568	7	2	2	1	28.8	4.61	6159	1	1	1	1166	2329.98	2	2329.96	0.0145	0	31.39	9.7	K	LLPGAQCGEGLCCDQCSFMK	K	4 Carbamidomethyl (C)	0.00000010000110010000.0	Cmpd 468, AutoMSn(1165.9956), 20.7 min
53	gi|67462321	RecName: Full=Disintegrin trigramin-gamma; AltName: Full=Platelet aggregation activation inhibitor [Trimeresurus gramineus]	111	7568	7	2	2	1	28.8	4.61	6160	1	1	1	777.671	2329.99	3	2329.96	0.0287	0	75.62	0.00035	K	LLPGAQCGEGLCCDQCSFMK	K	4 Carbamidomethyl (C)	0.00000010000110010000.0	Cmpd 469, AutoMSn(777.6709), 20.7 min
53	gi|67462321	RecName: Full=Disintegrin trigramin-gamma; AltName: Full=Platelet aggregation activation inhibitor [Trimeresurus gramineus]	111	7568	7	2	2	1	28.8	4.61	6161	1	1	1	777.671	2329.99	3	2329.96	0.0298	0	61.91	0.0082	K	LLPGAQCGEGLCCDQCSFMK	K	4 Carbamidomethyl (C)	0.00000010000110010000.0	Cmpd 467, AutoMSn(777.6713), 20.7 min
53	gi|67462321	RecName: Full=Disintegrin trigramin-gamma; AltName: Full=Platelet aggregation activation inhibitor [Trimeresurus gramineus]	111	7568	7	2	2	1	28.8	4.61	6176	1	1	1	782.342	2344	3	2344.01	-0.01	1	13.91	510	K	LLPGAQCGEGLCCDQCSFMKK	G	2 Carbamidomethyl (C)	0.000000100001000000000.0	Cmpd 472, AutoMSn(782.3420), 20.8 min
53	gi|67462321	RecName: Full=Disintegrin trigramin-gamma; AltName: Full=Platelet aggregation activation inhibitor [Trimeresurus gramineus]	111	7568	7	2	2	1	28.8	4.61	6178	4	1	1	782.345	2344.01	3	2344.01	0.0002	1	15.5	340	K	LLPGAQCGEGLCCDQCSFMKK	G	2 Carbamidomethyl (C)	0.000000100001000000000.0	Cmpd 475, AutoMSn(782.3454), 20.8 min
53	gi|67462321	RecName: Full=Disintegrin trigramin-gamma; AltName: Full=Platelet aggregation activation inhibitor [Trimeresurus gramineus]	111	7568	7	2	2	1	28.8	4.61	6181	1	1	1	783.004	2345.99	3	2345.96	0.0344	0	46	0.33	K	LLPGAQCGEGLCCDQCSFMK	K	4 Carbamidomethyl (C); Oxidation (M)	0.00000010000110010020.0	Cmpd 401, AutoMSn(783.0044), 19.2 min	emPAI	2.17
54	gi|675402288	metalloprotease P-IIIc, partial [Protobothrops elegans]	107	19473	10	2	2	1	11.7	5.4	3421	1	0	1	634.305	1266.6	2	1266.59	0.0046	0	31.51	11	R	LYCLDSSPANK	N	Carbamidomethyl (C)	0.00100000000.0	Cmpd 238, AutoMSn(634.3053), 16.2 min
54	gi|675402288	metalloprotease P-IIIc, partial [Protobothrops elegans]	107	19473	10	2	2	1	11.7	5.4	3436	8	0	0	635.289	1268.56	2	1268.56	0.0065	1	16.71	330	R	SAECTDRFQR	N	Carbamidomethyl (C)	0.0001000000.0	Cmpd 42, AutoMSn(635.2889), 11.9 min
54	gi|675402288	metalloprotease P-IIIc, partial [Protobothrops elegans]	107	19473	10	2	2	1	11.7	5.4	3441	1	0	0	423.863	1268.57	3	1268.56	0.0118	1	35.52	4.3	R	SAECTDRFQR	N	Carbamidomethyl (C)	0.0001000000.0	Cmpd 20, AutoMSn(423.8635), 11.8 min
54	gi|675402288	metalloprotease P-IIIc, partial [Protobothrops elegans]	107	19473	10	2	2	1	11.7	5.4	3442	1	0	0	423.864	1268.57	3	1268.56	0.0125	1	55.21	0.046	R	SAECTDRFQR	N	Carbamidomethyl (C)	0.0001000000.0	Cmpd 56, AutoMSn(423.8637), 12.1 min
54	gi|675402288	metalloprotease P-IIIc, partial [Protobothrops elegans]	107	19473	10	2	2	1	11.7	5.4	3444	1	0	0	423.864	1268.57	3	1268.56	0.014	1	51.94	0.098	R	SAECTDRFQR	N	Carbamidomethyl (C)	0.0001000000.0	Cmpd 48, AutoMSn(423.8642), 11.9 min
54	gi|675402288	metalloprotease P-IIIc, partial [Protobothrops elegans]	107	19473	10	2	2	1	11.7	5.4	3445	1	0	0	423.864	1268.57	3	1268.56	0.0144	1	27.59	27	R	SAECTDRFQR	N	Carbamidomethyl (C)	0.0001000000.0	Cmpd 41, AutoMSn(423.8643), 11.9 min
54	gi|675402288	metalloprotease P-IIIc, partial [Protobothrops elegans]	107	19473	10	2	2	1	11.7	5.4	3447	1	0	0	423.865	1268.57	3	1268.56	0.0156	1	38.25	2.3	R	SAECTDRFQR	N	Carbamidomethyl (C)	0.0001000000.0	Cmpd 17, AutoMSn(423.8647), 11.8 min
54	gi|675402288	metalloprotease P-IIIc, partial [Protobothrops elegans]	107	19473	10	2	2	1	11.7	5.4	3448	1	0	0	423.865	1268.57	3	1268.56	0.0159	1	29.21	18	R	SAECTDRFQR	N	Carbamidomethyl (C)	0.0001000000.0	Cmpd 94, AutoMSn(423.8648), 11.9 min
54	gi|675402288	metalloprotease P-IIIc, partial [Protobothrops elegans]	107	19473	10	2	2	1	11.7	5.4	3449	1	0	0	423.865	1268.57	3	1268.56	0.016	1	56.5	0.034	R	SAECTDRFQR	N	Carbamidomethyl (C)	0.0001000000.0	Cmpd 51, AutoMSn(423.8649), 12.0 min
54	gi|675402288	metalloprotease P-IIIc, partial [Protobothrops elegans]	107	19473	10	2	2	1	11.7	5.4	3450	1	0	0	423.868	1268.58	3	1268.56	0.0264	1	52	0.095	R	SAECTDRFQR	N	Carbamidomethyl (C)	0.0001000000.0	Cmpd 39, AutoMSn(423.8683), 11.9 min	emPAI	0.38
55	gi|431921656	Keratin, type II cytoskeletal 75 [Pteropus alecto]	105	119627	10	3	2	1	2.2	6.66	3517	1	0	0	651.862	1301.71	2	1301.71	0.0016	0	51.26	0.12	R	SLDLDSIIAEVK	A			Cmpd 597, AutoMSn(651.8620), 26.0 min
55	gi|431921656	Keratin, type II cytoskeletal 75 [Pteropus alecto]	105	119627	10	3	2	1	2.2	6.66	3520	1	0	0	651.864	1301.71	2	1301.71	0.0046	0	55.33	0.047	R	SLDLDSIIAEVK	A			Cmpd 416, AutoMSn(651.8635), 25.9 min
55	gi|431921656	Keratin, type II cytoskeletal 75 [Pteropus alecto]	105	119627	10	3	2	1	2.2	6.66	3522	1	0	0	651.864	1301.71	2	1301.71	0.0057	0	68.08	0.0025	R	SLDLDSIIAEVK	A			Cmpd 654, AutoMSn(651.8640), 26.0 min
55	gi|431921656	Keratin, type II cytoskeletal 75 [Pteropus alecto]	105	119627	10	3	2	1	2.2	6.66	3523	1	0	0	651.864	1301.71	2	1301.71	0.0059	0	33	8	R	SLDLDSIIAEVK	A			Cmpd 594, AutoMSn(651.8641), 25.9 min
55	gi|431921656	Keratin, type II cytoskeletal 75 [Pteropus alecto]	105	119627	10	3	2	1	2.2	6.66	3525	1	0	0	651.865	1301.71	2	1301.71	0.0068	0	73.31	0.00074	R	SLDLDSIIAEVK	A			Cmpd 651, AutoMSn(651.8646), 25.9 min
55	gi|431921656	Keratin, type II cytoskeletal 75 [Pteropus alecto]	105	119627	10	3	2	1	2.2	6.66	3528	1	0	0	651.866	1301.72	2	1301.71	0.0092	0	21.91	100	R	SLDLDSIIAEVK	A			Cmpd 658, AutoMSn(651.8658), 25.9 min
55	gi|431921656	Keratin, type II cytoskeletal 75 [Pteropus alecto]	105	119627	10	3	2	1	2.2	6.66	3529	1	0	0	651.866	1301.72	2	1301.71	0.0095	0	38.59	2.2	R	SLDLDSIIAEVK	A			Cmpd 591, AutoMSn(651.8659), 25.8 min
55	gi|431921656	Keratin, type II cytoskeletal 75 [Pteropus alecto]	105	119627	10	3	2	1	2.2	6.66	3531	4	0	0	651.868	1301.72	2	1301.71	0.0137	0	23.39	73	R	SLDLDSIIAEVK	A			Cmpd 648, AutoMSn(651.8680), 25.8 min
55	gi|431921656	Keratin, type II cytoskeletal 75 [Pteropus alecto]	105	119627	10	3	2	1	2.2	6.66	3709	1	0	0	665.368	1328.72	2	1328.72	0.0021	0	46.62	0.36	R	NLDLDSIIAEVK	A			Cmpd 652, AutoMSn(665.3677), 25.9 min
55	gi|431921656	Keratin, type II cytoskeletal 75 [Pteropus alecto]	105	119627	10	3	2	1	2.2	6.66	3710	1	0	0	665.37	1328.73	2	1328.72	0.0068	0	46.17	0.4	R	NLDLDSIIAEVK	A			Cmpd 656, AutoMSn(665.3700), 26.0 min	emPAI	0.06
56	gi|538259837	l-amino acid oxidase [Protobothrops flavoviridis]	104	57093	38	3	9	1	13.5	8.67	1155	1	1	0	664.784	663.777	1	664.38	-0.6029	0	9.93	4200	K	EYLIK	E			Cmpd 166, AutoMSn(664.7840), 15.1 min
56	gi|538259837	l-amino acid oxidase [Protobothrops flavoviridis]	104	57093	38	3	9	1	13.5	8.67	2034	1	1	0	438.725	875.436	2	875.435	0.0013	0	41.54	1.5	K	STTDLPSR	F			Cmpd 65, AutoMSn(438.7254), 12.8 min
56	gi|538259837	l-amino acid oxidase [Protobothrops flavoviridis]	104	57093	38	3	9	1	13.5	8.67	2035	1	1	0	438.726	875.438	2	875.435	0.0028	0	40.4	2	K	STTDLPSR	F			Cmpd 94, AutoMSn(438.7261), 12.9 min
56	gi|538259837	l-amino acid oxidase [Protobothrops flavoviridis]	104	57093	38	3	9	1	13.5	8.67	2036	1	1	0	438.728	875.442	2	875.435	0.0074	0	22.92	110	K	STTDLPSR	F			Cmpd 138, AutoMSn(438.7284), 12.9 min
56	gi|538259837	l-amino acid oxidase [Protobothrops flavoviridis]	104	57093	38	3	9	1	13.5	8.67	2037	1	1	0	438.729	875.444	2	875.435	0.0093	0	26.75	45	K	STTDLPSR	F			Cmpd 139, AutoMSn(438.7294), 12.9 min
56	gi|538259837	l-amino acid oxidase [Protobothrops flavoviridis]	104	57093	38	3	9	1	13.5	8.67	2055	1	1	0	882.472	881.465	1	881.468	-0.0036	0	35.83	3.9	K	IFLTCTK	K	Carbamidomethyl (C)	0.0000100.0	Cmpd 260, AutoMSn(882.4717), 16.6 min
56	gi|538259837	l-amino acid oxidase [Protobothrops flavoviridis]	104	57093	38	3	9	1	13.5	8.67	2056	1	1	0	441.743	881.47	2	881.468	0.0024	0	35.58	4.1	K	IFLTCTK	K	Carbamidomethyl (C)	0.0000100.0	Cmpd 262, AutoMSn(441.7425), 16.7 min
56	gi|538259837	l-amino acid oxidase [Protobothrops flavoviridis]	104	57093	38	3	9	1	13.5	8.67	2057	1	1	0	441.743	881.471	2	881.468	0.0034	0	34.43	5.4	K	IFLTCTK	K	Carbamidomethyl (C)	0.0000100.0	Cmpd 303, AutoMSn(441.7430), 16.6 min
56	gi|538259837	l-amino acid oxidase [Protobothrops flavoviridis]	104	57093	38	3	9	1	13.5	8.67	2058	1	1	0	441.743	881.472	2	881.468	0.0041	0	41.17	1.1	K	IFLTCTK	K	Carbamidomethyl (C)	0.0000100.0	Cmpd 228, AutoMSn(441.7434), 16.5 min
56	gi|538259837	l-amino acid oxidase [Protobothrops flavoviridis]	104	57093	38	3	9	1	13.5	8.67	2061	2	1	0	441.744	881.473	2	881.468	0.0047	0	19.37	170	K	IFLTCTK	K	Carbamidomethyl (C)	0.0000100.0	Cmpd 301, AutoMSn(441.7437), 16.5 min
56	gi|538259837	l-amino acid oxidase [Protobothrops flavoviridis]	104	57093	38	3	9	1	13.5	8.67	2062	1	1	0	441.744	881.473	2	881.468	0.0052	0	35.72	4	K	IFLTCTK	K	Carbamidomethyl (C)	0.0000100.0	Cmpd 259, AutoMSn(441.7439), 16.6 min
56	gi|538259837	l-amino acid oxidase [Protobothrops flavoviridis]	104	57093	38	3	9	1	13.5	8.67	2063	1	1	0	441.745	881.475	2	881.468	0.0064	0	34.95	4.8	K	IFLTCTK	K	Carbamidomethyl (C)	0.0000100.0	Cmpd 306, AutoMSn(441.7445), 16.7 min
56	gi|538259837	l-amino acid oxidase [Protobothrops flavoviridis]	104	57093	38	3	9	1	13.5	8.67	2064	1	1	0	441.745	881.475	2	881.468	0.0065	0	32.92	7.6	K	IFLTCTK	K	Carbamidomethyl (C)	0.0000100.0	Cmpd 252, AutoMSn(441.7446), 16.7 min
56	gi|538259837	l-amino acid oxidase [Protobothrops flavoviridis]	104	57093	38	3	9	1	13.5	8.67	2065	1	1	0	441.745	881.475	2	881.468	0.0072	0	35.62	4.1	K	IFLTCTK	K	Carbamidomethyl (C)	0.0000100.0	Cmpd 231, AutoMSn(441.7449), 16.6 min
56	gi|538259837	l-amino acid oxidase [Protobothrops flavoviridis]	104	57093	38	3	9	1	13.5	8.67	2066	1	1	0	441.745	881.476	2	881.468	0.0075	0	35.22	4.5	K	IFLTCTK	K	Carbamidomethyl (C)	0.0000100.0	Cmpd 256, AutoMSn(441.7451), 16.5 min
56	gi|538259837	l-amino acid oxidase [Protobothrops flavoviridis]	104	57093	38	3	9	1	13.5	8.67	2067	1	1	0	441.746	881.477	2	881.468	0.0093	0	40.97	1.2	K	IFLTCTK	K	Carbamidomethyl (C)	0.0000100.0	Cmpd 249, AutoMSn(441.7460), 16.6 min
56	gi|538259837	l-amino acid oxidase [Protobothrops flavoviridis]	104	57093	38	3	9	1	13.5	8.67	2871	1	1	0	567.297	1132.58	2	1132.58	0.0035	0	28.7	24	K	YPVKPSEEGK	S			Cmpd 95, AutoMSn(567.2972), 11.9 min
56	gi|538259837	l-amino acid oxidase [Protobothrops flavoviridis]	104	57093	38	3	9	1	13.5	8.67	2872	1	1	0	567.298	1132.58	2	1132.58	0.0052	0	41	1.4	K	YPVKPSEEGK	S			Cmpd 49, AutoMSn(567.2981), 11.9 min
56	gi|538259837	l-amino acid oxidase [Protobothrops flavoviridis]	104	57093	38	3	9	1	13.5	8.67	2873	1	1	0	567.298	1132.58	2	1132.58	0.0059	0	34.78	5.8	K	YPVKPSEEGK	S			Cmpd 48, AutoMSn(567.2985), 11.9 min
56	gi|538259837	l-amino acid oxidase [Protobothrops flavoviridis]	104	57093	38	3	9	1	13.5	8.67	2876	1	1	0	567.299	1132.58	2	1132.58	0.007	0	45.6	0.48	K	YPVKPSEEGK	S			Cmpd 38, AutoMSn(567.2990), 11.9 min
56	gi|538259837	l-amino acid oxidase [Protobothrops flavoviridis]	104	57093	38	3	9	1	13.5	8.67	2879	3	1	0	378.536	1132.59	3	1132.58	0.011	0	28.06	27	K	YPVKPSEEGK	S			Cmpd 96, AutoMSn(378.5364), 11.9 min
56	gi|538259837	l-amino acid oxidase [Protobothrops flavoviridis]	104	57093	38	3	9	1	13.5	8.67	3389	1	1	0	420.863	1259.57	3	1259.56	0.0099	0	15.5	470	K	FWEDDGIHGGK	S			Cmpd 268, AutoMSn(420.8629), 15.8 min
56	gi|538259837	l-amino acid oxidase [Protobothrops flavoviridis]	104	57093	38	3	9	1	13.5	8.67	3390	1	1	0	420.863	1259.57	3	1259.56	0.0103	0	19.27	200	K	FWEDDGIHGGK	S			Cmpd 272, AutoMSn(420.8631), 15.9 min
56	gi|538259837	l-amino acid oxidase [Protobothrops flavoviridis]	104	57093	38	3	9	1	13.5	8.67	3391	1	1	0	420.864	1259.57	3	1259.56	0.012	0	23.14	81	K	FWEDDGIHGGK	S			Cmpd 225, AutoMSn(420.8637), 15.8 min
56	gi|538259837	l-amino acid oxidase [Protobothrops flavoviridis]	104	57093	38	3	9	1	13.5	8.67	4052	1	1	0	463.561	1387.66	3	1387.65	0.0096	1	22.81	84	K	KFWEDDGIHGGK	S			Cmpd 172, AutoMSn(463.5612), 14.7 min
56	gi|538259837	l-amino acid oxidase [Protobothrops flavoviridis]	104	57093	38	3	9	1	13.5	8.67	4053	1	1	0	463.561	1387.66	3	1387.65	0.0097	1	15.61	440	K	KFWEDDGIHGGK	S			Cmpd 217, AutoMSn(463.5612), 14.7 min
56	gi|538259837	l-amino acid oxidase [Protobothrops flavoviridis]	104	57093	38	3	9	1	13.5	8.67	4055	1	1	0	463.563	1387.67	3	1387.65	0.0139	1	32.72	8.6	K	KFWEDDGIHGGK	S			Cmpd 141, AutoMSn(463.5626), 14.6 min
56	gi|538259837	l-amino acid oxidase [Protobothrops flavoviridis]	104	57093	38	3	9	1	13.5	8.67	4056	1	1	0	463.564	1387.67	3	1387.65	0.0168	1	39.19	1.9	K	KFWEDDGIHGGK	S			Cmpd 169, AutoMSn(463.5636), 14.6 min
56	gi|538259837	l-amino acid oxidase [Protobothrops flavoviridis]	104	57093	38	3	9	1	13.5	8.67	4370	1	1	0	757.852	1513.69	2	1513.69	-0.0036	0	33.81	5.9	R	ETDYEEFLEIAR	N			Cmpd 580, AutoMSn(757.8523), 24.4 min
56	gi|538259837	l-amino acid oxidase [Protobothrops flavoviridis]	104	57093	38	3	9	1	13.5	8.67	4371	1	0	0	757.856	1513.7	2	1513.69	0.0038	0	42.15	0.86	R	ETDYEEFLEIAR	N			Cmpd 623, AutoMSn(757.8560), 24.3 min
56	gi|538259837	l-amino acid oxidase [Protobothrops flavoviridis]	104	57093	38	3	9	1	13.5	8.67	4372	1	0	0	757.856	1513.7	2	1513.69	0.0047	0	54.98	0.045	R	ETDYEEFLEIAR	N			Cmpd 592, AutoMSn(757.8564), 24.3 min
56	gi|538259837	l-amino acid oxidase [Protobothrops flavoviridis]	104	57093	38	3	9	1	13.5	8.67	4373	1	1	0	757.857	1513.7	2	1513.69	0.0057	0	34.52	5	R	ETDYEEFLEIAR	N			Cmpd 626, AutoMSn(757.8570), 24.3 min
56	gi|538259837	l-amino acid oxidase [Protobothrops flavoviridis]	104	57093	38	3	9	1	13.5	8.67	4374	1	0	0	757.858	1513.7	2	1513.69	0.0075	0	63.93	0.0057	R	ETDYEEFLEIAR	N			Cmpd 592, AutoMSn(757.8579), 24.3 min
56	gi|538259837	l-amino acid oxidase [Protobothrops flavoviridis]	104	57093	38	3	9	1	13.5	8.67	4375	1	0	0	757.859	1513.7	2	1513.69	0.01	0	63.08	0.0069	R	ETDYEEFLEIAR	N			Cmpd 545, AutoMSn(757.8591), 24.3 min
56	gi|538259837	l-amino acid oxidase [Protobothrops flavoviridis]	104	57093	38	3	9	1	13.5	8.67	4653	1	1	1	808.872	1615.73	2	1615.74	-0.0083	0	36.1	3.5	K	DIQAFCYPSMIQK	W	Carbamidomethyl (C); Oxidation (M)	0.0000010002000.0	Cmpd 486, AutoMSn(808.8719), 20.9 min
56	gi|538259837	l-amino acid oxidase [Protobothrops flavoviridis]	104	57093	38	3	9	1	13.5	8.67	4981	1	1	1	576.96	1727.86	3	1727.84	0.0216	1	22.57	73	K	KDIQAFCYPSMIQK	W	Carbamidomethyl (C)	0.00000010000000.0	Cmpd 369, AutoMSn(576.9603), 19.0 min
56	gi|538259837	l-amino acid oxidase [Protobothrops flavoviridis]	104	57093	38	3	9	1	13.5	8.67	4982	1	1	1	576.961	1727.86	3	1727.84	0.0234	1	22.76	70	K	KDIQAFCYPSMIQK	W	Carbamidomethyl (C)	0.00000010000000.0	Cmpd 357, AutoMSn(576.9609), 19.0 min
56	gi|538259837	l-amino acid oxidase [Protobothrops flavoviridis]	104	57093	38	3	9	1	13.5	8.67	4983	1	1	1	576.963	1727.87	3	1727.84	0.0294	1	38.92	1.7	K	KDIQAFCYPSMIQK	W	Carbamidomethyl (C)	0.00000010000000.0	Cmpd 335, AutoMSn(576.9629), 18.9 min	emPAI	0.25
57	gi|82094948	RecName: Full=Bradykinin-releasing enzyme KR-E-1; AltName: Full=Snake venom serine protease; Short=SVSP; AltName: Full=Thrombin-like enzyme defibrase [Gloydius ussuriensis]	102	25335	8	2	3	1	13.2	4.82	2185	2	1	0	453.747	905.479	2	905.479	-0.0001	1	19.14	230	K	FICPNKK	N	Carbamidomethyl (C)	0.0010000.0	Cmpd 32, AutoMSn(453.7469), 11.5 min
57	gi|82094948	RecName: Full=Bradykinin-releasing enzyme KR-E-1; AltName: Full=Snake venom serine protease; Short=SVSP; AltName: Full=Thrombin-like enzyme defibrase [Gloydius ussuriensis]	102	25335	8	2	3	1	13.2	4.82	2187	1	1	0	453.749	905.484	2	905.479	0.0046	1	34.08	7.5	K	FICPNKK	N	Carbamidomethyl (C)	0.0010000.0	Cmpd 35, AutoMSn(453.7492), 11.6 min
57	gi|82094948	RecName: Full=Bradykinin-releasing enzyme KR-E-1; AltName: Full=Snake venom serine protease; Short=SVSP; AltName: Full=Thrombin-like enzyme defibrase [Gloydius ussuriensis]	102	25335	8	2	3	1	13.2	4.82	2188	1	1	0	453.75	905.486	2	905.479	0.0073	1	22.41	110	K	FICPNKK	N	Carbamidomethyl (C)	0.0010000.0	Cmpd 38, AutoMSn(453.7506), 11.7 min
57	gi|82094948	RecName: Full=Bradykinin-releasing enzyme KR-E-1; AltName: Full=Snake venom serine protease; Short=SVSP; AltName: Full=Thrombin-like enzyme defibrase [Gloydius ussuriensis]	102	25335	8	2	3	1	13.2	4.82	2807	1	0	0	559.803	1117.59	2	1117.58	0.0113	0	54.06	0.069	R	TLCAGILEGGK	D	Carbamidomethyl (C)	0.00100000000.0	Cmpd 319, AutoMSn(559.8030), 18.1 min
57	gi|82094948	RecName: Full=Bradykinin-releasing enzyme KR-E-1; AltName: Full=Snake venom serine protease; Short=SVSP; AltName: Full=Thrombin-like enzyme defibrase [Gloydius ussuriensis]	102	25335	8	2	3	1	13.2	4.82	4365	1	0	0	756.852	1511.69	2	1511.68	0.0117	0	60.34	0.013	-	VIGGDECNINEHR	S	Carbamidomethyl (C)	0.0000001000000.0	Cmpd 88, AutoMSn(756.8524), 13.4 min
57	gi|82094948	RecName: Full=Bradykinin-releasing enzyme KR-E-1; AltName: Full=Snake venom serine protease; Short=SVSP; AltName: Full=Thrombin-like enzyme defibrase [Gloydius ussuriensis]	102	25335	8	2	3	1	13.2	4.82	4366	2	0	0	504.904	1511.69	3	1511.68	0.0127	0	21.12	110	-	VIGGDECNINEHR	S	Carbamidomethyl (C)	0.0000001000000.0	Cmpd 97, AutoMSn(504.9044), 13.0 min
57	gi|82094948	RecName: Full=Bradykinin-releasing enzyme KR-E-1; AltName: Full=Snake venom serine protease; Short=SVSP; AltName: Full=Thrombin-like enzyme defibrase [Gloydius ussuriensis]	102	25335	8	2	3	1	13.2	4.82	4367	1	0	0	504.906	1511.7	3	1511.68	0.0168	0	84.65	4.8e-05	-	VIGGDECNINEHR	S	Carbamidomethyl (C)	0.0000001000000.0	Cmpd 87, AutoMSn(504.9058), 13.4 min
57	gi|82094948	RecName: Full=Bradykinin-releasing enzyme KR-E-1; AltName: Full=Snake venom serine protease; Short=SVSP; AltName: Full=Thrombin-like enzyme defibrase [Gloydius ussuriensis]	102	25335	8	2	3	1	13.2	4.82	4368	1	0	0	504.906	1511.7	3	1511.68	0.0179	0	27.12	27	-	VIGGDECNINEHR	S	Carbamidomethyl (C)	0.0000001000000.0	Cmpd 91, AutoMSn(504.9061), 13.4 min	emPAI	0.45
58	gi|32469800	RecName: Full=Thrombin-like enzyme contortrixobin; Short=SVTLE; AltName: Full=Fibrinogen-clotting enzyme; AltName: Full=Snake venom serine protease; Short=SVSP; AltName: Full=Venombin B [Agkistrodon contortrix contortrix]	102	25396	6	1	3	1	13.2	4.95	2185	2	0	0	453.747	905.479	2	905.479	-0.0001	1	19.14	230	K	FICPNKK	N	Carbamidomethyl (C)	0.0010000.0	Cmpd 32, AutoMSn(453.7469), 11.5 min
58	gi|32469800	RecName: Full=Thrombin-like enzyme contortrixobin; Short=SVTLE; AltName: Full=Fibrinogen-clotting enzyme; AltName: Full=Snake venom serine protease; Short=SVSP; AltName: Full=Venombin B [Agkistrodon contortrix contortrix]	102	25396	6	1	3	1	13.2	4.95	2187	1	0	0	453.749	905.484	2	905.479	0.0046	1	34.08	7.5	K	FICPNKK	N	Carbamidomethyl (C)	0.0010000.0	Cmpd 35, AutoMSn(453.7492), 11.6 min
58	gi|32469800	RecName: Full=Thrombin-like enzyme contortrixobin; Short=SVTLE; AltName: Full=Fibrinogen-clotting enzyme; AltName: Full=Snake venom serine protease; Short=SVSP; AltName: Full=Venombin B [Agkistrodon contortrix contortrix]	102	25396	6	1	3	1	13.2	4.95	2188	1	0	0	453.75	905.486	2	905.479	0.0073	1	22.41	110	K	FICPNKK	N	Carbamidomethyl (C)	0.0010000.0	Cmpd 38, AutoMSn(453.7506), 11.7 min
58	gi|32469800	RecName: Full=Thrombin-like enzyme contortrixobin; Short=SVTLE; AltName: Full=Fibrinogen-clotting enzyme; AltName: Full=Snake venom serine protease; Short=SVSP; AltName: Full=Venombin B [Agkistrodon contortrix contortrix]	102	25396	6	1	3	1	13.2	4.95	2807	1	0	0	559.803	1117.59	2	1117.58	0.0113	0	54.06	0.069	R	TLCAGILEGGK	D	Carbamidomethyl (C)	0.00100000000.0	Cmpd 319, AutoMSn(559.8030), 18.1 min
58	gi|32469800	RecName: Full=Thrombin-like enzyme contortrixobin; Short=SVTLE; AltName: Full=Fibrinogen-clotting enzyme; AltName: Full=Snake venom serine protease; Short=SVSP; AltName: Full=Venombin B [Agkistrodon contortrix contortrix]	102	25396	6	1	3	1	13.2	4.95	4328	1	1	1	749.843	1497.67	2	1497.66	0.0085	0	22.62	77	-	VVGGDECNINEHR	F	Carbamidomethyl (C)	0.0000001000000.0	Cmpd 86, AutoMSn(749.8430), 12.7 min
58	gi|32469800	RecName: Full=Thrombin-like enzyme contortrixobin; Short=SVTLE; AltName: Full=Fibrinogen-clotting enzyme; AltName: Full=Snake venom serine protease; Short=SVSP; AltName: Full=Venombin B [Agkistrodon contortrix contortrix]	102	25396	6	1	3	1	13.2	4.95	4329	1	1	1	500.235	1497.68	3	1497.66	0.0207	0	94.61	4.8e-06	-	VVGGDECNINEHR	F	Carbamidomethyl (C)	0.0000001000000.0	Cmpd 85, AutoMSn(500.2352), 12.7 min	emPAI	0.28
59	gi|48425312	Chain A, L-Amino Acid Oxidase From Agkistrodon Halys Pallas	101	55097	27	3	5	1	8.6	6.55	1155	1	0	0	664.784	663.777	1	664.38	-0.6029	0	9.93	4200	K	EYLLK	E			Cmpd 166, AutoMSn(664.7840), 15.1 min
59	gi|48425312	Chain A, L-Amino Acid Oxidase From Agkistrodon Halys Pallas	101	55097	27	3	5	1	8.6	6.55	2034	1	0	0	438.725	875.436	2	875.435	0.0013	0	41.54	1.5	K	STTDLPSR	F			Cmpd 65, AutoMSn(438.7254), 12.8 min
59	gi|48425312	Chain A, L-Amino Acid Oxidase From Agkistrodon Halys Pallas	101	55097	27	3	5	1	8.6	6.55	2035	1	0	0	438.726	875.438	2	875.435	0.0028	0	40.4	2	K	STTDLPSR	F			Cmpd 94, AutoMSn(438.7261), 12.9 min
59	gi|48425312	Chain A, L-Amino Acid Oxidase From Agkistrodon Halys Pallas	101	55097	27	3	5	1	8.6	6.55	2036	1	0	0	438.728	875.442	2	875.435	0.0074	0	22.92	110	K	STTDLPSR	F			Cmpd 138, AutoMSn(438.7284), 12.9 min
59	gi|48425312	Chain A, L-Amino Acid Oxidase From Agkistrodon Halys Pallas	101	55097	27	3	5	1	8.6	6.55	2037	1	0	0	438.729	875.444	2	875.435	0.0093	0	26.75	45	K	STTDLPSR	F			Cmpd 139, AutoMSn(438.7294), 12.9 min
59	gi|48425312	Chain A, L-Amino Acid Oxidase From Agkistrodon Halys Pallas	101	55097	27	3	5	1	8.6	6.55	2055	1	0	0	882.472	881.465	1	881.468	-0.0036	0	35.83	3.9	K	IFLTCTK	K	Carbamidomethyl (C)	0.0000100.0	Cmpd 260, AutoMSn(882.4717), 16.6 min
59	gi|48425312	Chain A, L-Amino Acid Oxidase From Agkistrodon Halys Pallas	101	55097	27	3	5	1	8.6	6.55	2056	1	0	0	441.743	881.47	2	881.468	0.0024	0	35.58	4.1	K	IFLTCTK	K	Carbamidomethyl (C)	0.0000100.0	Cmpd 262, AutoMSn(441.7425), 16.7 min
59	gi|48425312	Chain A, L-Amino Acid Oxidase From Agkistrodon Halys Pallas	101	55097	27	3	5	1	8.6	6.55	2057	1	0	0	441.743	881.471	2	881.468	0.0034	0	34.43	5.4	K	IFLTCTK	K	Carbamidomethyl (C)	0.0000100.0	Cmpd 303, AutoMSn(441.7430), 16.6 min
59	gi|48425312	Chain A, L-Amino Acid Oxidase From Agkistrodon Halys Pallas	101	55097	27	3	5	1	8.6	6.55	2058	1	0	0	441.743	881.472	2	881.468	0.0041	0	41.17	1.1	K	IFLTCTK	K	Carbamidomethyl (C)	0.0000100.0	Cmpd 228, AutoMSn(441.7434), 16.5 min
59	gi|48425312	Chain A, L-Amino Acid Oxidase From Agkistrodon Halys Pallas	101	55097	27	3	5	1	8.6	6.55	2061	2	0	0	441.744	881.473	2	881.468	0.0047	0	19.37	170	K	IFLTCTK	K	Carbamidomethyl (C)	0.0000100.0	Cmpd 301, AutoMSn(441.7437), 16.5 min
59	gi|48425312	Chain A, L-Amino Acid Oxidase From Agkistrodon Halys Pallas	101	55097	27	3	5	1	8.6	6.55	2062	1	0	0	441.744	881.473	2	881.468	0.0052	0	35.72	4	K	IFLTCTK	K	Carbamidomethyl (C)	0.0000100.0	Cmpd 259, AutoMSn(441.7439), 16.6 min
59	gi|48425312	Chain A, L-Amino Acid Oxidase From Agkistrodon Halys Pallas	101	55097	27	3	5	1	8.6	6.55	2063	1	0	0	441.745	881.475	2	881.468	0.0064	0	34.95	4.8	K	IFLTCTK	K	Carbamidomethyl (C)	0.0000100.0	Cmpd 306, AutoMSn(441.7445), 16.7 min
59	gi|48425312	Chain A, L-Amino Acid Oxidase From Agkistrodon Halys Pallas	101	55097	27	3	5	1	8.6	6.55	2064	1	0	0	441.745	881.475	2	881.468	0.0065	0	32.92	7.6	K	IFLTCTK	K	Carbamidomethyl (C)	0.0000100.0	Cmpd 252, AutoMSn(441.7446), 16.7 min
59	gi|48425312	Chain A, L-Amino Acid Oxidase From Agkistrodon Halys Pallas	101	55097	27	3	5	1	8.6	6.55	2065	1	0	0	441.745	881.475	2	881.468	0.0072	0	35.62	4.1	K	IFLTCTK	K	Carbamidomethyl (C)	0.0000100.0	Cmpd 231, AutoMSn(441.7449), 16.6 min
59	gi|48425312	Chain A, L-Amino Acid Oxidase From Agkistrodon Halys Pallas	101	55097	27	3	5	1	8.6	6.55	2066	1	0	0	441.745	881.476	2	881.468	0.0075	0	35.22	4.5	K	IFLTCTK	K	Carbamidomethyl (C)	0.0000100.0	Cmpd 256, AutoMSn(441.7451), 16.5 min
59	gi|48425312	Chain A, L-Amino Acid Oxidase From Agkistrodon Halys Pallas	101	55097	27	3	5	1	8.6	6.55	2067	1	0	0	441.746	881.477	2	881.468	0.0093	0	40.97	1.2	K	IFLTCTK	K	Carbamidomethyl (C)	0.0000100.0	Cmpd 249, AutoMSn(441.7460), 16.6 min
59	gi|48425312	Chain A, L-Amino Acid Oxidase From Agkistrodon Halys Pallas	101	55097	27	3	5	1	8.6	6.55	2871	1	0	0	567.297	1132.58	2	1132.58	0.0035	0	28.7	24	K	YPVKPSEEGK	S			Cmpd 95, AutoMSn(567.2972), 11.9 min
59	gi|48425312	Chain A, L-Amino Acid Oxidase From Agkistrodon Halys Pallas	101	55097	27	3	5	1	8.6	6.55	2872	1	0	0	567.298	1132.58	2	1132.58	0.0052	0	41	1.4	K	YPVKPSEEGK	S			Cmpd 49, AutoMSn(567.2981), 11.9 min
59	gi|48425312	Chain A, L-Amino Acid Oxidase From Agkistrodon Halys Pallas	101	55097	27	3	5	1	8.6	6.55	2873	1	0	0	567.298	1132.58	2	1132.58	0.0059	0	34.78	5.8	K	YPVKPSEEGK	S			Cmpd 48, AutoMSn(567.2985), 11.9 min
59	gi|48425312	Chain A, L-Amino Acid Oxidase From Agkistrodon Halys Pallas	101	55097	27	3	5	1	8.6	6.55	2876	1	0	0	567.299	1132.58	2	1132.58	0.007	0	45.6	0.48	K	YPVKPSEEGK	S			Cmpd 38, AutoMSn(567.2990), 11.9 min
59	gi|48425312	Chain A, L-Amino Acid Oxidase From Agkistrodon Halys Pallas	101	55097	27	3	5	1	8.6	6.55	2879	3	0	0	378.536	1132.59	3	1132.58	0.011	0	28.06	27	K	YPVKPSEEGK	S			Cmpd 96, AutoMSn(378.5364), 11.9 min
59	gi|48425312	Chain A, L-Amino Acid Oxidase From Agkistrodon Halys Pallas	101	55097	27	3	5	1	8.6	6.55	4370	1	0	0	757.852	1513.69	2	1513.69	-0.0036	0	33.81	5.9	R	ETDYEEFLEIAR	N			Cmpd 580, AutoMSn(757.8523), 24.4 min
59	gi|48425312	Chain A, L-Amino Acid Oxidase From Agkistrodon Halys Pallas	101	55097	27	3	5	1	8.6	6.55	4371	1	0	0	757.856	1513.7	2	1513.69	0.0038	0	42.15	0.86	R	ETDYEEFLEIAR	N			Cmpd 623, AutoMSn(757.8560), 24.3 min
59	gi|48425312	Chain A, L-Amino Acid Oxidase From Agkistrodon Halys Pallas	101	55097	27	3	5	1	8.6	6.55	4372	1	0	0	757.856	1513.7	2	1513.69	0.0047	0	54.98	0.045	R	ETDYEEFLEIAR	N			Cmpd 592, AutoMSn(757.8564), 24.3 min
59	gi|48425312	Chain A, L-Amino Acid Oxidase From Agkistrodon Halys Pallas	101	55097	27	3	5	1	8.6	6.55	4373	1	0	0	757.857	1513.7	2	1513.69	0.0057	0	34.52	5	R	ETDYEEFLEIAR	N			Cmpd 626, AutoMSn(757.8570), 24.3 min
59	gi|48425312	Chain A, L-Amino Acid Oxidase From Agkistrodon Halys Pallas	101	55097	27	3	5	1	8.6	6.55	4374	1	0	0	757.858	1513.7	2	1513.69	0.0075	0	63.93	0.0057	R	ETDYEEFLEIAR	N			Cmpd 592, AutoMSn(757.8579), 24.3 min
59	gi|48425312	Chain A, L-Amino Acid Oxidase From Agkistrodon Halys Pallas	101	55097	27	3	5	1	8.6	6.55	4375	1	0	0	757.859	1513.7	2	1513.69	0.01	0	63.08	0.0069	R	ETDYEEFLEIAR	N			Cmpd 545, AutoMSn(757.8591), 24.3 min	emPAI	0.06
60	gi|143681919	RecName: Full=Thrombin-like enzyme kangshuanmei; Short=SVTLE; AltName: Full=Fibrinogen-clotting enzyme; AltName: Full=Snake venom serine protease; Short=SVSP [Gloydius brevicaudus]	99	26415	6	2	2	1	14.8	8.27	4365	1	0	0	756.852	1511.69	2	1511.68	0.0117	0	60.34	0.013	-	VIGGDECNINEHR	F	Carbamidomethyl (C)	0.0000001000000.0	Cmpd 88, AutoMSn(756.8524), 13.4 min
60	gi|143681919	RecName: Full=Thrombin-like enzyme kangshuanmei; Short=SVTLE; AltName: Full=Fibrinogen-clotting enzyme; AltName: Full=Snake venom serine protease; Short=SVSP [Gloydius brevicaudus]	99	26415	6	2	2	1	14.8	8.27	4366	2	0	0	504.904	1511.69	3	1511.68	0.0127	0	21.12	110	-	VIGGDECNINEHR	F	Carbamidomethyl (C)	0.0000001000000.0	Cmpd 97, AutoMSn(504.9044), 13.0 min
60	gi|143681919	RecName: Full=Thrombin-like enzyme kangshuanmei; Short=SVTLE; AltName: Full=Fibrinogen-clotting enzyme; AltName: Full=Snake venom serine protease; Short=SVSP [Gloydius brevicaudus]	99	26415	6	2	2	1	14.8	8.27	4367	1	0	0	504.906	1511.7	3	1511.68	0.0168	0	84.65	4.8e-05	-	VIGGDECNINEHR	F	Carbamidomethyl (C)	0.0000001000000.0	Cmpd 87, AutoMSn(504.9058), 13.4 min
60	gi|143681919	RecName: Full=Thrombin-like enzyme kangshuanmei; Short=SVTLE; AltName: Full=Fibrinogen-clotting enzyme; AltName: Full=Snake venom serine protease; Short=SVSP [Gloydius brevicaudus]	99	26415	6	2	2	1	14.8	8.27	4368	1	0	0	504.906	1511.7	3	1511.68	0.0179	0	27.12	27	-	VIGGDECNINEHR	F	Carbamidomethyl (C)	0.0000001000000.0	Cmpd 91, AutoMSn(504.9061), 13.4 min
60	gi|143681919	RecName: Full=Thrombin-like enzyme kangshuanmei; Short=SVTLE; AltName: Full=Fibrinogen-clotting enzyme; AltName: Full=Snake venom serine protease; Short=SVSP [Gloydius brevicaudus]	99	26415	6	2	2	1	14.8	8.27	6331	2	1	1	818.735	2453.18	3	2453.24	-0.0577	1	43.95	0.41	K	VFDHLDWIQSIIAGNKTVTCPP	-			Cmpd 751, AutoMSn(818.7352), 29.6 min
60	gi|143681919	RecName: Full=Thrombin-like enzyme kangshuanmei; Short=SVTLE; AltName: Full=Fibrinogen-clotting enzyme; AltName: Full=Snake venom serine protease; Short=SVSP [Gloydius brevicaudus]	99	26415	6	2	2	1	14.8	8.27	6332	3	1	1	818.736	2453.19	3	2453.24	-0.0538	1	20.03	100	K	VFDHLDWIQSIIAGNKTVTCPP	-			Cmpd 747, AutoMSn(818.7364), 29.5 min	emPAI	0.27
61	gi|299493	bilineobin=thrombin-like proteinase {N-terminal} [Agkistrodon bilineatus=common cantil, venom, Peptide Partial, 24 aa]	99	2737	5	2	2	1	54.2	4.31	4365	1	0	1	756.852	1511.69	2	1511.68	0.0117	0	60.34	0.013	-	VIGGDECNINEHR	F	Carbamidomethyl (C)	0.0000001000000.0	Cmpd 88, AutoMSn(756.8524), 13.4 min
61	gi|299493	bilineobin=thrombin-like proteinase {N-terminal} [Agkistrodon bilineatus=common cantil, venom, Peptide Partial, 24 aa]	99	2737	5	2	2	1	54.2	4.31	4366	2	0	1	504.904	1511.69	3	1511.68	0.0127	0	21.12	110	-	VIGGDECNINEHR	F	Carbamidomethyl (C)	0.0000001000000.0	Cmpd 97, AutoMSn(504.9044), 13.0 min
61	gi|299493	bilineobin=thrombin-like proteinase {N-terminal} [Agkistrodon bilineatus=common cantil, venom, Peptide Partial, 24 aa]	99	2737	5	2	2	1	54.2	4.31	4367	1	0	1	504.906	1511.7	3	1511.68	0.0168	0	84.65	4.8e-05	-	VIGGDECNINEHR	F	Carbamidomethyl (C)	0.0000001000000.0	Cmpd 87, AutoMSn(504.9058), 13.4 min
61	gi|299493	bilineobin=thrombin-like proteinase {N-terminal} [Agkistrodon bilineatus=common cantil, venom, Peptide Partial, 24 aa]	99	2737	5	2	2	1	54.2	4.31	4368	1	0	1	504.906	1511.7	3	1511.68	0.0179	0	27.12	27	-	VIGGDECNINEHR	F	Carbamidomethyl (C)	0.0000001000000.0	Cmpd 91, AutoMSn(504.9061), 13.4 min
61	gi|299493	bilineobin=thrombin-like proteinase {N-terminal} [Agkistrodon bilineatus=common cantil, venom, Peptide Partial, 24 aa]	99	2737	5	2	2	1	54.2	4.31	4380	1	1	1	505.937	1514.79	3	1514.71	0.0781	0	24.51	53	-	VIGGDEYNINEHR	F			Cmpd 95, AutoMSn(505.9371), 12.9 min	emPAI	4.69
62	gi|545193036	PREDICTED: disintegrin and metalloproteinase domain-containing protein 12 isoform X1 [Equus caballus]	97	96154	8	2	1	1	1.1	8.64	3160	1	1	1	596.784	1191.55	2	1191.55	0.005	1	39.33	1.9	K	CADGKVCLNR	R	2 Carbamidomethyl (C)	0.1000001000.0	Cmpd 62, AutoMSn(596.7842), 12.2 min
62	gi|545193036	PREDICTED: disintegrin and metalloproteinase domain-containing protein 12 isoform X1 [Equus caballus]	97	96154	8	2	1	1	1.1	8.64	3161	1	1	1	398.193	1191.56	3	1191.55	0.0096	1	54.42	0.059	K	CADGKVCLNR	R	2 Carbamidomethyl (C)	0.1000001000.0	Cmpd 58, AutoMSn(398.1934), 12.1 min
62	gi|545193036	PREDICTED: disintegrin and metalloproteinase domain-containing protein 12 isoform X1 [Equus caballus]	97	96154	8	2	1	1	1.1	8.64	3162	1	1	1	596.787	1191.56	2	1191.55	0.01	1	31.46	12	K	CADGKVCLNR	R	2 Carbamidomethyl (C)	0.1000001000.0	Cmpd 105, AutoMSn(596.7867), 12.1 min
62	gi|545193036	PREDICTED: disintegrin and metalloproteinase domain-containing protein 12 isoform X1 [Equus caballus]	97	96154	8	2	1	1	1.1	8.64	3163	1	1	1	398.194	1191.56	3	1191.55	0.01	1	56.44	0.037	K	CADGKVCLNR	R	2 Carbamidomethyl (C)	0.1000001000.0	Cmpd 50, AutoMSn(398.1936), 12.1 min
62	gi|545193036	PREDICTED: disintegrin and metalloproteinase domain-containing protein 12 isoform X1 [Equus caballus]	97	96154	8	2	1	1	1.1	8.64	3164	1	1	1	398.194	1191.56	3	1191.55	0.0115	1	65.27	0.0049	K	CADGKVCLNR	R	2 Carbamidomethyl (C)	0.1000001000.0	Cmpd 60, AutoMSn(398.1941), 12.2 min
62	gi|545193036	PREDICTED: disintegrin and metalloproteinase domain-containing protein 12 isoform X1 [Equus caballus]	97	96154	8	2	1	1	1.1	8.64	3165	1	1	1	398.194	1191.56	3	1191.55	0.0116	1	44.14	0.63	K	CADGKVCLNR	R	2 Carbamidomethyl (C)	0.1000001000.0	Cmpd 104, AutoMSn(398.1941), 12.1 min
62	gi|545193036	PREDICTED: disintegrin and metalloproteinase domain-containing protein 12 isoform X1 [Equus caballus]	97	96154	8	2	1	1	1.1	8.64	3166	1	1	1	398.194	1191.56	3	1191.55	0.0116	1	32.13	10	K	CADGKVCLNR	R	2 Carbamidomethyl (C)	0.1000001000.0	Cmpd 59, AutoMSn(398.1941), 12.1 min
62	gi|545193036	PREDICTED: disintegrin and metalloproteinase domain-containing protein 12 isoform X1 [Equus caballus]	97	96154	8	2	1	1	1.1	8.64	3168	1	1	1	398.196	1191.57	3	1191.55	0.0185	1	35.45	4.7	K	CADGKVCLNR	R	2 Carbamidomethyl (C)	0.1000001000.0	Cmpd 55, AutoMSn(398.1964), 12.2 min	emPAI	0.07
63	gi|123900231	RecName: Full=Zinc metalloproteinase-disintegrin-like stejnihagin-A; AltName: Full=Snake venom metalloproteinase; Short=SVMP; Flags: Precursor [Trimeresurus stejnegeri]	95	67760	16	1	4	1	6.7	5.41	2728	1	1	1	1093.49	1092.49	1	1092.49	-0.0041	0	52.2	0.1	R	HCVDVTTVY	-	Carbamidomethyl (C)	0.010000000.0	Cmpd 282, AutoMSn(1093.4942), 17.1 min
63	gi|123900231	RecName: Full=Zinc metalloproteinase-disintegrin-like stejnihagin-A; AltName: Full=Snake venom metalloproteinase; Short=SVMP; Flags: Precursor [Trimeresurus stejnegeri]	95	67760	16	1	4	1	6.7	5.41	2729	1	1	1	1093.5	1092.49	1	1092.49	-0.0032	0	57.83	0.028	R	HCVDVTTVY	-	Carbamidomethyl (C)	0.010000000.0	Cmpd 271, AutoMSn(1093.4951), 17.0 min
63	gi|123900231	RecName: Full=Zinc metalloproteinase-disintegrin-like stejnihagin-A; AltName: Full=Snake venom metalloproteinase; Short=SVMP; Flags: Precursor [Trimeresurus stejnegeri]	95	67760	16	1	4	1	6.7	5.41	2730	1	1	1	1093.5	1092.49	1	1092.49	-0.0006	0	41.04	1.3	R	HCVDVTTVY	-	Carbamidomethyl (C)	0.010000000.0	Cmpd 273, AutoMSn(1093.4977), 17.1 min
63	gi|123900231	RecName: Full=Zinc metalloproteinase-disintegrin-like stejnihagin-A; AltName: Full=Snake venom metalloproteinase; Short=SVMP; Flags: Precursor [Trimeresurus stejnegeri]	95	67760	16	1	4	1	6.7	5.41	2731	5	1	1	547.253	1092.49	2	1092.49	0.001	0	14.73	570	R	HCVDVTTVY	-	Carbamidomethyl (C)	0.010000000.0	Cmpd 206, AutoMSn(547.2533), 17.0 min
63	gi|123900231	RecName: Full=Zinc metalloproteinase-disintegrin-like stejnihagin-A; AltName: Full=Snake venom metalloproteinase; Short=SVMP; Flags: Precursor [Trimeresurus stejnegeri]	95	67760	16	1	4	1	6.7	5.41	2732	1	1	1	547.255	1092.5	2	1092.49	0.0047	0	27.55	30	R	HCVDVTTVY	-	Carbamidomethyl (C)	0.010000000.0	Cmpd 328, AutoMSn(547.2552), 17.2 min
63	gi|123900231	RecName: Full=Zinc metalloproteinase-disintegrin-like stejnihagin-A; AltName: Full=Snake venom metalloproteinase; Short=SVMP; Flags: Precursor [Trimeresurus stejnegeri]	95	67760	16	1	4	1	6.7	5.41	2733	1	1	1	547.255	1092.5	2	1092.49	0.0054	0	28.32	25	R	HCVDVTTVY	-	Carbamidomethyl (C)	0.010000000.0	Cmpd 277, AutoMSn(547.2555), 17.2 min
63	gi|123900231	RecName: Full=Zinc metalloproteinase-disintegrin-like stejnihagin-A; AltName: Full=Snake venom metalloproteinase; Short=SVMP; Flags: Precursor [Trimeresurus stejnegeri]	95	67760	16	1	4	1	6.7	5.41	2734	1	1	1	547.256	1092.5	2	1092.49	0.0057	0	24.87	55	R	HCVDVTTVY	-	Carbamidomethyl (C)	0.010000000.0	Cmpd 284, AutoMSn(547.2557), 17.2 min
63	gi|123900231	RecName: Full=Zinc metalloproteinase-disintegrin-like stejnihagin-A; AltName: Full=Snake venom metalloproteinase; Short=SVMP; Flags: Precursor [Trimeresurus stejnegeri]	95	67760	16	1	4	1	6.7	5.41	2735	1	1	1	547.256	1092.5	2	1092.49	0.0075	0	28.07	27	R	HCVDVTTVY	-	Carbamidomethyl (C)	0.010000000.0	Cmpd 326, AutoMSn(547.2565), 17.1 min
63	gi|123900231	RecName: Full=Zinc metalloproteinase-disintegrin-like stejnihagin-A; AltName: Full=Snake venom metalloproteinase; Short=SVMP; Flags: Precursor [Trimeresurus stejnegeri]	95	67760	16	1	4	1	6.7	5.41	2736	1	1	1	547.257	1092.5	2	1092.49	0.0078	0	30.56	15	R	HCVDVTTVY	-	Carbamidomethyl (C)	0.010000000.0	Cmpd 280, AutoMSn(547.2567), 17.1 min
63	gi|123900231	RecName: Full=Zinc metalloproteinase-disintegrin-like stejnihagin-A; AltName: Full=Snake venom metalloproteinase; Short=SVMP; Flags: Precursor [Trimeresurus stejnegeri]	95	67760	16	1	4	1	6.7	5.41	2737	1	1	1	547.257	1092.5	2	1092.49	0.0086	0	27.72	29	R	HCVDVTTVY	-	Carbamidomethyl (C)	0.010000000.0	Cmpd 269, AutoMSn(547.2571), 17.0 min
63	gi|123900231	RecName: Full=Zinc metalloproteinase-disintegrin-like stejnihagin-A; AltName: Full=Snake venom metalloproteinase; Short=SVMP; Flags: Precursor [Trimeresurus stejnegeri]	95	67760	16	1	4	1	6.7	5.41	2738	1	1	1	547.257	1092.5	2	1092.49	0.0093	0	29.87	18	R	HCVDVTTVY	-	Carbamidomethyl (C)	0.010000000.0	Cmpd 272, AutoMSn(547.2574), 17.1 min
63	gi|123900231	RecName: Full=Zinc metalloproteinase-disintegrin-like stejnihagin-A; AltName: Full=Snake venom metalloproteinase; Short=SVMP; Flags: Precursor [Trimeresurus stejnegeri]	95	67760	16	1	4	1	6.7	5.41	2810	1	1	1	561.741	1121.47	2	1121.46	0.0073	0	39.95	1.7	K	GEQYFYCR	K	Carbamidomethyl (C)	0.00000010.0	Cmpd 231, AutoMSn(561.7409), 16.2 min
63	gi|123900231	RecName: Full=Zinc metalloproteinase-disintegrin-like stejnihagin-A; AltName: Full=Snake venom metalloproteinase; Short=SVMP; Flags: Precursor [Trimeresurus stejnegeri]	95	67760	16	1	4	1	6.7	5.41	2811	1	1	1	561.742	1121.47	2	1121.46	0.0103	0	39.75	1.8	K	GEQYFYCR	K	Carbamidomethyl (C)	0.00000010.0	Cmpd 228, AutoMSn(561.7425), 16.1 min
63	gi|123900231	RecName: Full=Zinc metalloproteinase-disintegrin-like stejnihagin-A; AltName: Full=Snake venom metalloproteinase; Short=SVMP; Flags: Precursor [Trimeresurus stejnegeri]	95	67760	16	1	4	1	6.7	5.41	4907	1	1	1	570.601	1708.78	3	1708.77	0.0165	1	19.61	150	K	VCNSNRHCVDVTTVY	-			Cmpd 195, AutoMSn(570.6015), 15.3 min
63	gi|123900231	RecName: Full=Zinc metalloproteinase-disintegrin-like stejnihagin-A; AltName: Full=Snake venom metalloproteinase; Short=SVMP; Flags: Precursor [Trimeresurus stejnegeri]	95	67760	16	1	4	1	6.7	5.41	5967	10	1	1	737.626	2209.86	3	2209.88	-0.0207	1	17.46	310	K	LHSWVKCESGECCDQCR	F	4 Carbamidomethyl (C)	0.00000010000110010.0	Cmpd 122, AutoMSn(737.6258), 15.0 min
63	gi|123900231	RecName: Full=Zinc metalloproteinase-disintegrin-like stejnihagin-A; AltName: Full=Snake venom metalloproteinase; Short=SVMP; Flags: Precursor [Trimeresurus stejnegeri]	95	67760	16	1	4	1	6.7	5.41	5972	2	1	1	737.631	2209.87	3	2209.88	-0.0057	1	17.28	310	K	LHSWVKCESGECCDQCR	F	4 Carbamidomethyl (C)	0.00000010000110010.0	Cmpd 182, AutoMSn(737.6308), 15.1 min	emPAI	0.15
64	gi|3122187	RecName: Full=Thrombin-like enzyme halystase; Short=SVTLE; AltName: Full=Snake venom serine protease; Short=SVSP [Gloydius blomhoffii]	95	26466	3	2	2	1	10.1	6.71	2807	1	0	0	559.803	1117.59	2	1117.58	0.0113	0	54.06	0.069	R	TLCAGILEGGK	D	Carbamidomethyl (C)	0.00100000000.0	Cmpd 319, AutoMSn(559.8030), 18.1 min
64	gi|3122187	RecName: Full=Thrombin-like enzyme halystase; Short=SVTLE; AltName: Full=Snake venom serine protease; Short=SVSP [Gloydius blomhoffii]	95	26466	3	2	2	1	10.1	6.71	4409	1	1	1	509.577	1525.71	3	1525.69	0.0165	0	77.5	0.00024	-	IIGGDECNINEHR	F	Carbamidomethyl (C)	0.0000001000000.0	Cmpd 112, AutoMSn(509.5776), 13.9 min
64	gi|3122187	RecName: Full=Thrombin-like enzyme halystase; Short=SVTLE; AltName: Full=Snake venom serine protease; Short=SVSP [Gloydius blomhoffii]	95	26466	3	2	2	1	10.1	6.71	4410	1	1	1	509.578	1525.71	3	1525.69	0.0181	0	65	0.0043	-	IIGGDECNINEHR	F	Carbamidomethyl (C)	0.0000001000000.0	Cmpd 114, AutoMSn(509.5781), 14.0 min	emPAI	0.27
65	gi|109482941	PREDICTED: keratin, type II cytoskeletal 6A-like isoform X3 [Rattus norvegicus]	93	59393	12	3	3	1	5.6	8.91	2785	1	0	0	554.276	1106.54	2	1106.57	-0.0341	1	27.05	35	K	AQYEEIAKR	S			Cmpd 131, AutoMSn(554.2762), 14.3 min
65	gi|109482941	PREDICTED: keratin, type II cytoskeletal 6A-like isoform X3 [Rattus norvegicus]	93	59393	12	3	3	1	5.6	8.91	2786	1	0	0	554.277	1106.54	2	1106.57	-0.0326	1	41.08	1.4	K	AQYEEIAKR	S			Cmpd 157, AutoMSn(554.2770), 14.3 min
65	gi|109482941	PREDICTED: keratin, type II cytoskeletal 6A-like isoform X3 [Rattus norvegicus]	93	59393	12	3	3	1	5.6	8.91	3087	1	0	0	590.305	1178.59	2	1178.59	0.0016	0	21.63	110	K	YEELQITAGR	H			Cmpd 273, AutoMSn(590.3046), 17.5 min
65	gi|109482941	PREDICTED: keratin, type II cytoskeletal 6A-like isoform X3 [Rattus norvegicus]	93	59393	12	3	3	1	5.6	8.91	3089	1	0	0	590.307	1178.6	2	1178.59	0.0061	0	51.09	0.13	K	YEELQITAGR	H			Cmpd 302, AutoMSn(590.3069), 17.6 min
65	gi|109482941	PREDICTED: keratin, type II cytoskeletal 6A-like isoform X3 [Rattus norvegicus]	93	59393	12	3	3	1	5.6	8.91	3517	1	0	0	651.862	1301.71	2	1301.71	0.0016	0	51.26	0.12	R	SLDLDSIIAEVK	A			Cmpd 597, AutoMSn(651.8620), 26.0 min
65	gi|109482941	PREDICTED: keratin, type II cytoskeletal 6A-like isoform X3 [Rattus norvegicus]	93	59393	12	3	3	1	5.6	8.91	3520	1	0	0	651.864	1301.71	2	1301.71	0.0046	0	55.33	0.047	R	SLDLDSIIAEVK	A			Cmpd 416, AutoMSn(651.8635), 25.9 min
65	gi|109482941	PREDICTED: keratin, type II cytoskeletal 6A-like isoform X3 [Rattus norvegicus]	93	59393	12	3	3	1	5.6	8.91	3522	1	0	0	651.864	1301.71	2	1301.71	0.0057	0	68.08	0.0025	R	SLDLDSIIAEVK	A			Cmpd 654, AutoMSn(651.8640), 26.0 min
65	gi|109482941	PREDICTED: keratin, type II cytoskeletal 6A-like isoform X3 [Rattus norvegicus]	93	59393	12	3	3	1	5.6	8.91	3523	1	0	0	651.864	1301.71	2	1301.71	0.0059	0	33	8	R	SLDLDSIIAEVK	A			Cmpd 594, AutoMSn(651.8641), 25.9 min
65	gi|109482941	PREDICTED: keratin, type II cytoskeletal 6A-like isoform X3 [Rattus norvegicus]	93	59393	12	3	3	1	5.6	8.91	3525	1	0	0	651.865	1301.71	2	1301.71	0.0068	0	73.31	0.00074	R	SLDLDSIIAEVK	A			Cmpd 651, AutoMSn(651.8646), 25.9 min
65	gi|109482941	PREDICTED: keratin, type II cytoskeletal 6A-like isoform X3 [Rattus norvegicus]	93	59393	12	3	3	1	5.6	8.91	3528	1	0	0	651.866	1301.72	2	1301.71	0.0092	0	21.91	100	R	SLDLDSIIAEVK	A			Cmpd 658, AutoMSn(651.8658), 25.9 min
65	gi|109482941	PREDICTED: keratin, type II cytoskeletal 6A-like isoform X3 [Rattus norvegicus]	93	59393	12	3	3	1	5.6	8.91	3529	1	0	0	651.866	1301.72	2	1301.71	0.0095	0	38.59	2.2	R	SLDLDSIIAEVK	A			Cmpd 591, AutoMSn(651.8659), 25.8 min
65	gi|109482941	PREDICTED: keratin, type II cytoskeletal 6A-like isoform X3 [Rattus norvegicus]	93	59393	12	3	3	1	5.6	8.91	3531	4	0	0	651.868	1301.72	2	1301.71	0.0137	0	23.39	73	R	SLDLDSIIAEVK	A			Cmpd 648, AutoMSn(651.8680), 25.8 min	emPAI	0.18
66	gi|640804365	PREDICTED: keratin, type II cytoskeletal 6A [Tarsius syrichta]	92	59823	10	3	2	1	3.7	7.57	3517	1	0	0	651.862	1301.71	2	1301.71	0.0016	0	51.26	0.12	R	SLDLDSIIAEVK	S			Cmpd 597, AutoMSn(651.8620), 26.0 min
66	gi|640804365	PREDICTED: keratin, type II cytoskeletal 6A [Tarsius syrichta]	92	59823	10	3	2	1	3.7	7.57	3520	1	0	0	651.864	1301.71	2	1301.71	0.0046	0	55.33	0.047	R	SLDLDSIIAEVK	S			Cmpd 416, AutoMSn(651.8635), 25.9 min
66	gi|640804365	PREDICTED: keratin, type II cytoskeletal 6A [Tarsius syrichta]	92	59823	10	3	2	1	3.7	7.57	3522	1	0	0	651.864	1301.71	2	1301.71	0.0057	0	68.08	0.0025	R	SLDLDSIIAEVK	S			Cmpd 654, AutoMSn(651.8640), 26.0 min
66	gi|640804365	PREDICTED: keratin, type II cytoskeletal 6A [Tarsius syrichta]	92	59823	10	3	2	1	3.7	7.57	3523	1	0	0	651.864	1301.71	2	1301.71	0.0059	0	33	8	R	SLDLDSIIAEVK	S			Cmpd 594, AutoMSn(651.8641), 25.9 min
66	gi|640804365	PREDICTED: keratin, type II cytoskeletal 6A [Tarsius syrichta]	92	59823	10	3	2	1	3.7	7.57	3525	1	0	0	651.865	1301.71	2	1301.71	0.0068	0	73.31	0.00074	R	SLDLDSIIAEVK	S			Cmpd 651, AutoMSn(651.8646), 25.9 min
66	gi|640804365	PREDICTED: keratin, type II cytoskeletal 6A [Tarsius syrichta]	92	59823	10	3	2	1	3.7	7.57	3528	1	0	0	651.866	1301.72	2	1301.71	0.0092	0	21.91	100	R	SLDLDSIIAEVK	S			Cmpd 658, AutoMSn(651.8658), 25.9 min
66	gi|640804365	PREDICTED: keratin, type II cytoskeletal 6A [Tarsius syrichta]	92	59823	10	3	2	1	3.7	7.57	3529	1	0	0	651.866	1301.72	2	1301.71	0.0095	0	38.59	2.2	R	SLDLDSIIAEVK	S			Cmpd 591, AutoMSn(651.8659), 25.8 min
66	gi|640804365	PREDICTED: keratin, type II cytoskeletal 6A [Tarsius syrichta]	92	59823	10	3	2	1	3.7	7.57	3531	4	0	0	651.868	1301.72	2	1301.71	0.0137	0	23.39	73	R	SLDLDSIIAEVK	S			Cmpd 648, AutoMSn(651.8680), 25.8 min
66	gi|640804365	PREDICTED: keratin, type II cytoskeletal 6A [Tarsius syrichta]	92	59823	10	3	2	1	3.7	7.57	6187	2	0	1	783.75	2348.23	3	2348.22	0.0064	1	27.22	22	R	SLDLDSIIAEVKSQYEAIAQR	S			Cmpd 731, AutoMSn(783.7502), 28.9 min
66	gi|640804365	PREDICTED: keratin, type II cytoskeletal 6A [Tarsius syrichta]	92	59823	10	3	2	1	3.7	7.57	6189	9	0	1	783.752	2348.23	3	2348.22	0.0114	1	18.49	170	R	SLDLDSIIAEVKSQYEAIAQR	S			Cmpd 736, AutoMSn(783.7518), 29.1 min	emPAI	0.05
67	gi|46485130	TPA_exp: keratin Kb40 [Mus musculus]	89	85186	8	2	2	1	4.6	8.66	4683	1	0	0	546.733	1637.18	3	1637.85	-0.6765	1	49.78	0.29	R	SLNNQFASFIDKVR	F			Cmpd 471, AutoMSn(546.7326), 21.4 min
67	gi|46485130	TPA_exp: keratin Kb40 [Mus musculus]	89	85186	8	2	2	1	4.6	8.66	4686	1	0	0	546.96	1637.86	3	1637.85	0.0056	1	39.25	1.7	R	SLNNQFASFIDKVR	F			Cmpd 472, AutoMSn(546.9600), 21.4 min
67	gi|46485130	TPA_exp: keratin Kb40 [Mus musculus]	89	85186	8	2	2	1	4.6	8.66	4687	2	0	0	546.961	1637.86	3	1637.85	0.0075	1	30.29	13	R	SLNNQFASFIDKVR	F			Cmpd 350, AutoMSn(546.9606), 21.4 min
67	gi|46485130	TPA_exp: keratin Kb40 [Mus musculus]	89	85186	8	2	2	1	4.6	8.66	4688	1	0	0	546.963	1637.87	3	1637.85	0.0152	1	82.08	8.8e-05	R	SLNNQFASFIDKVR	F			Cmpd 439, AutoMSn(546.9632), 21.3 min
67	gi|46485130	TPA_exp: keratin Kb40 [Mus musculus]	89	85186	8	2	2	1	4.6	8.66	4689	1	0	0	546.964	1637.87	3	1637.85	0.0185	1	36.51	3.2	R	SLNNQFASFIDKVR	F			Cmpd 477, AutoMSn(546.9643), 21.5 min
67	gi|46485130	TPA_exp: keratin Kb40 [Mus musculus]	89	85186	8	2	2	1	4.6	8.66	4693	1	0	0	546.966	1637.88	3	1637.85	0.0251	1	33.75	6	R	SLNNQFASFIDKVR	F			Cmpd 285, AutoMSn(546.9665), 21.3 min
67	gi|46485130	TPA_exp: keratin Kb40 [Mus musculus]	89	85186	8	2	2	1	4.6	8.66	4694	1	0	0	547.154	1638.44	3	1637.85	0.5866	1	57.91	0.043	R	SLNNQFASFIDKVR	F			Cmpd 442, AutoMSn(547.1536), 21.4 min
67	gi|46485130	TPA_exp: keratin Kb40 [Mus musculus]	89	85186	8	2	2	1	4.6	8.66	6049	6	1	1	1118.04	2234.07	2	2234	0.0663	1	11.09	870	R	GECGGQVTMPGRGSGGQVTMPGR	G	Oxidation (M)	0.00000000000000000002000.0	Cmpd 790, AutoMSn(1118.0400), 30.0 min	emPAI	0.04
68	gi|46395675	RecName: Full=Cysteine-rich venom protein tripurin; Short=CRVP, partial [Trimeresurus purpureomaculatus]	86	3971	7	0	2	0	33.3	9.19	3149	1	0	1	595.307	1188.6	2	1188.59	0.0073	0	33.73	7.4	R	SVNPTASNMLR	S			Cmpd 238, AutoMSn(595.3070), 16.1 min
68	gi|46395675	RecName: Full=Cysteine-rich venom protein tripurin; Short=CRVP, partial [Trimeresurus purpureomaculatus]	86	3971	7	0	2	0	33.3	9.19	3150	1	0	1	595.307	1188.6	2	1188.59	0.0075	0	45.49	0.49	R	SVNPTASNMLR	S			Cmpd 241, AutoMSn(595.3071), 16.2 min
68	gi|46395675	RecName: Full=Cysteine-rich venom protein tripurin; Short=CRVP, partial [Trimeresurus purpureomaculatus]	86	3971	7	0	2	0	33.3	9.19	3151	1	0	1	595.307	1188.6	2	1188.59	0.0079	0	44.92	0.56	R	SVNPTASNMLR	S			Cmpd 245, AutoMSn(595.3073), 16.3 min
68	gi|46395675	RecName: Full=Cysteine-rich venom protein tripurin; Short=CRVP, partial [Trimeresurus purpureomaculatus]	86	3971	7	0	2	0	33.3	9.19	3224	1	0	1	603.303	1204.59	2	1204.59	0.0046	0	50.74	0.14	R	SVNPTASNMLR	S	Oxidation (M)	0.00000000200.0	Cmpd 141, AutoMSn(603.3031), 13.9 min
68	gi|46395675	RecName: Full=Cysteine-rich venom protein tripurin; Short=CRVP, partial [Trimeresurus purpureomaculatus]	86	3971	7	0	2	0	33.3	9.19	3225	1	0	1	603.304	1204.59	2	1204.59	0.0068	0	26.23	40	R	SVNPTASNMLR	S	Oxidation (M)	0.00000000200.0	Cmpd 145, AutoMSn(603.3042), 14.1 min
68	gi|46395675	RecName: Full=Cysteine-rich venom protein tripurin; Short=CRVP, partial [Trimeresurus purpureomaculatus]	86	3971	7	0	2	0	33.3	9.19	3226	1	0	1	603.304	1204.59	2	1204.59	0.0075	0	51.71	0.11	R	SVNPTASNMLR	S	Oxidation (M)	0.00000000200.0	Cmpd 142, AutoMSn(603.3045), 14.0 min
68	gi|46395675	RecName: Full=Cysteine-rich venom protein tripurin; Short=CRVP, partial [Trimeresurus purpureomaculatus]	86	3971	7	0	2	0	33.3	9.19	3313	2	1	1	616.809	1231.6	2	1231.63	-0.0311	1	16.41	380	R	SVNPKASNMLR	S	Oxidation (M)	0.00000000200.0	Cmpd 171, AutoMSn(616.8088), 14.6 min	emPAI	2.76
69	gi|675416384	PREDICTED: keratin, type II cytoskeletal 5-like, partial [Manacus vitellinus]	84	97060	9	3	3	1	3.7	5.35	2426	1	0	0	517.262	1032.51	2	1032.51	0	0	40.19	1.8	K	TLLEGEESR	L			Cmpd 115, AutoMSn(517.2616), 14.8 min
69	gi|675416384	PREDICTED: keratin, type II cytoskeletal 5-like, partial [Manacus vitellinus]	84	97060	9	3	3	1	3.7	5.35	2427	1	0	0	517.263	1032.51	2	1032.51	0.0031	0	30.45	17	K	TLLEGEESR	L			Cmpd 18, AutoMSn(517.2632), 14.8 min
69	gi|675416384	PREDICTED: keratin, type II cytoskeletal 5-like, partial [Manacus vitellinus]	84	97060	9	3	3	1	3.7	5.35	2428	1	0	0	517.263	1032.51	2	1032.51	0.0032	0	59.02	0.024	K	TLLEGEESR	L			Cmpd 181, AutoMSn(517.2632), 14.9 min
69	gi|675416384	PREDICTED: keratin, type II cytoskeletal 5-like, partial [Manacus vitellinus]	84	97060	9	3	3	1	3.7	5.35	2429	1	0	0	517.263	1032.51	2	1032.51	0.0034	0	55.38	0.055	K	TLLEGEESR	L			Cmpd 150, AutoMSn(517.2633), 14.8 min
69	gi|675416384	PREDICTED: keratin, type II cytoskeletal 5-like, partial [Manacus vitellinus]	84	97060	9	3	3	1	3.7	5.35	2430	1	0	0	517.264	1032.51	2	1032.51	0.0047	0	58.91	0.024	K	TLLEGEESR	L			Cmpd 178, AutoMSn(517.2640), 14.8 min
69	gi|675416384	PREDICTED: keratin, type II cytoskeletal 5-like, partial [Manacus vitellinus]	84	97060	9	3	3	1	3.7	5.35	2432	1	0	0	517.265	1032.52	2	1032.51	0.0077	0	33.81	7.8	K	TLLEGEESR	L			Cmpd 157, AutoMSn(517.2655), 14.9 min
69	gi|675416384	PREDICTED: keratin, type II cytoskeletal 5-like, partial [Manacus vitellinus]	84	97060	9	3	3	1	3.7	5.35	2433	1	0	0	517.266	1032.52	2	1032.51	0.008	0	21.02	150	K	TLLEGEESR	L			Cmpd 80, AutoMSn(517.2656), 14.8 min
69	gi|675416384	PREDICTED: keratin, type II cytoskeletal 5-like, partial [Manacus vitellinus]	84	97060	9	3	3	1	3.7	5.35	3406	1	1	1	633.369	1264.72	2	1264.66	0.0606	1	17.74	280	-	GPGVQPNRIDGR	L			Cmpd 757, AutoMSn(633.3694), 30.2 min
69	gi|675416384	PREDICTED: keratin, type II cytoskeletal 5-like, partial [Manacus vitellinus]	84	97060	9	3	3	1	3.7	5.35	3525	8	0	0	651.865	1301.71	2	1301.71	0.0068	0	25.47	45	R	DLDLSSIIAEVK	A			Cmpd 651, AutoMSn(651.8646), 25.9 min	emPAI	0.03
70	gi|148672076	mCG17605, isoform CRA_b [Mus musculus]	84	72140	5	1	3	1	4.6	8.28	2470	1	0	0	521.283	1040.55	2	1040.55	0.0018	0	21.41	110	K	VDPEIQNVK	S			Cmpd 186, AutoMSn(521.2833), 14.9 min
70	gi|148672076	mCG17605, isoform CRA_b [Mus musculus]	84	72140	5	1	3	1	4.6	8.28	2471	1	0	0	521.287	1040.56	2	1040.55	0.0093	0	21.59	100	K	VDPEIQNVK	S			Cmpd 189, AutoMSn(521.2870), 15.0 min
70	gi|148672076	mCG17605, isoform CRA_b [Mus musculus]	84	72140	5	1	3	1	4.6	8.28	3087	1	0	0	590.305	1178.59	2	1178.62	-0.0236	0	21.63	110	K	YEELQVTAVK	H			Cmpd 273, AutoMSn(590.3046), 17.5 min
70	gi|148672076	mCG17605, isoform CRA_b [Mus musculus]	84	72140	5	1	3	1	4.6	8.28	3089	4	0	0	590.307	1178.6	2	1178.62	-0.0191	0	35.4	4.7	K	YEELQVTAVK	H			Cmpd 302, AutoMSn(590.3069), 17.6 min
70	gi|148672076	mCG17605, isoform CRA_b [Mus musculus]	84	72140	5	1	3	1	4.6	8.28	3373	1	0	0	627.81	1253.61	2	1253.6	0.0058	0	84.05	5.9e-05	R	GFSSGSAVVSGGSR	R			Cmpd 180, AutoMSn(627.8102), 14.8 min	emPAI	0.05
71	gi|112826	RecName: Full=5~-nucleotidase; Short=5~-NT; AltName: Full=Ecto-5~-nucleotidase; AltName: CD_antigen=CD73; Flags: Precursor [Rattus norvegicus]	80	63928	3	2	1	1	2.1	6.51	3535	1	0	1	653.864	1305.71	2	1305.74	-0.0315	1	29.65	17	R	KVPVVQAYAFGK	Y			Cmpd 383, AutoMSn(653.8638), 20.0 min
71	gi|112826	RecName: Full=5~-nucleotidase; Short=5~-NT; AltName: Full=Ecto-5~-nucleotidase; AltName: CD_antigen=CD73; Flags: Precursor [Rattus norvegicus]	80	63928	3	2	1	1	2.1	6.51	3536	1	0	1	653.865	1305.72	2	1305.74	-0.0289	1	56.67	0.034	R	KVPVVQAYAFGK	Y			Cmpd 386, AutoMSn(653.8651), 20.1 min
71	gi|112826	RecName: Full=5~-nucleotidase; Short=5~-NT; AltName: Full=Ecto-5~-nucleotidase; AltName: CD_antigen=CD73; Flags: Precursor [Rattus norvegicus]	80	63928	3	2	1	1	2.1	6.51	3537	1	0	1	653.866	1305.72	2	1305.74	-0.027	1	63.63	0.0068	R	KVPVVQAYAFGK	Y			Cmpd 389, AutoMSn(653.8661), 20.2 min	emPAI	0.05
72	gi|538259813	galactose binding lectin, partial [Protobothrops flavoviridis]	79	17654	14	0	3	0	23	5.72	3138	1	1	1	594.275	1186.54	2	1186.53	0.0097	1	38.18	2.6	K	NAFLCQCKF	-	2 Carbamidomethyl (C)	0.000010100.0	Cmpd 378, AutoMSn(594.2753), 18.7 min
72	gi|538259813	galactose binding lectin, partial [Protobothrops flavoviridis]	79	17654	14	0	3	0	23	5.72	3139	1	1	1	594.275	1186.54	2	1186.53	0.0098	1	36.36	3.9	K	NAFLCQCKF	-	2 Carbamidomethyl (C)	0.000010100.0	Cmpd 381, AutoMSn(594.2753), 18.7 min
72	gi|538259813	galactose binding lectin, partial [Protobothrops flavoviridis]	79	17654	14	0	3	0	23	5.72	3140	2	1	1	594.276	1186.54	2	1186.53	0.0104	1	28.44	24	K	NAFLCQCKF	-	2 Carbamidomethyl (C)	0.000010100.0	Cmpd 384, AutoMSn(594.2756), 18.8 min
72	gi|538259813	galactose binding lectin, partial [Protobothrops flavoviridis]	79	17654	14	0	3	0	23	5.72	3345	1	1	1	621.268	1240.52	2	1240.51	0.0059	0	32.42	9.2	K	DFSWEWTDR	S			Cmpd 549, AutoMSn(621.2677), 23.5 min
72	gi|538259813	galactose binding lectin, partial [Protobothrops flavoviridis]	79	17654	14	0	3	0	23	5.72	3346	1	1	1	621.269	1240.52	2	1240.51	0.0086	0	26.99	32	K	DFSWEWTDR	S			Cmpd 588, AutoMSn(621.2690), 23.4 min
72	gi|538259813	galactose binding lectin, partial [Protobothrops flavoviridis]	79	17654	14	0	3	0	23	5.72	3347	1	1	1	621.269	1240.52	2	1240.51	0.0089	0	36.35	3.7	K	DFSWEWTDR	S			Cmpd 591, AutoMSn(621.2692), 23.5 min
72	gi|538259813	galactose binding lectin, partial [Protobothrops flavoviridis]	79	17654	14	0	3	0	23	5.72	3348	1	1	1	621.27	1240.53	2	1240.51	0.0106	0	43.76	0.67	K	DFSWEWTDR	S			Cmpd 594, AutoMSn(621.2700), 23.5 min
72	gi|538259813	galactose binding lectin, partial [Protobothrops flavoviridis]	79	17654	14	0	3	0	23	5.72	3349	1	1	1	621.27	1240.53	2	1240.51	0.0113	0	32.86	8.3	K	DFSWEWTDR	S			Cmpd 553, AutoMSn(621.2704), 23.6 min
72	gi|538259813	galactose binding lectin, partial [Protobothrops flavoviridis]	79	17654	14	0	3	0	23	5.72	5807	1	1	1	691.982	2072.92	3	2072.9	0.0266	1	46.85	0.26	K	IFDEPKTWEDAEMFCR	K	Carbamidomethyl (C)	0.0000000000000010.0	Cmpd 558, AutoMSn(691.9819), 22.7 min
72	gi|538259813	galactose binding lectin, partial [Protobothrops flavoviridis]	79	17654	14	0	3	0	23	5.72	5808	1	1	1	691.982	2072.93	3	2072.9	0.0282	1	37.44	2.2	K	IFDEPKTWEDAEMFCR	K	Carbamidomethyl (C)	0.0000000000000010.0	Cmpd 556, AutoMSn(691.9824), 22.7 min
72	gi|538259813	galactose binding lectin, partial [Protobothrops flavoviridis]	79	17654	14	0	3	0	23	5.72	5809	1	1	1	691.983	2072.93	3	2072.9	0.0297	1	36.76	2.6	K	IFDEPKTWEDAEMFCR	K	Carbamidomethyl (C)	0.0000000000000010.0	Cmpd 561, AutoMSn(691.9829), 22.8 min
72	gi|538259813	galactose binding lectin, partial [Protobothrops flavoviridis]	79	17654	14	0	3	0	23	5.72	5826	3	1	1	697.314	2088.92	3	2088.89	0.027	1	17.07	250	K	IFDEPKTWEDAEMFCR	K	Carbamidomethyl (C); Oxidation (M)	0.0000000000002010.0	Cmpd 514, AutoMSn(697.3136), 21.7 min
72	gi|538259813	galactose binding lectin, partial [Protobothrops flavoviridis]	79	17654	14	0	3	0	23	5.72	5827	1	1	1	697.315	2088.92	3	2088.89	0.03	1	41.58	0.88	K	IFDEPKTWEDAEMFCR	K	Carbamidomethyl (C); Oxidation (M)	0.0000000000002010.0	Cmpd 509, AutoMSn(697.3147), 21.6 min
72	gi|538259813	galactose binding lectin, partial [Protobothrops flavoviridis]	79	17654	14	0	3	0	23	5.72	5828	1	1	1	697.315	2088.92	3	2088.89	0.0316	1	53.47	0.057	K	IFDEPKTWEDAEMFCR	K	Carbamidomethyl (C); Oxidation (M)	0.0000000000002010.0	Cmpd 511, AutoMSn(697.3152), 21.7 min	emPAI	0.69
73	gi|380875419	RecName: Full=Alpha-fibrinogenase albofibrase; AltName: Full=Snake venom serine protease; Short=SVSP; Flags: Precursor [Trimeresurus albolabris]	78	27983	6	1	4	1	16.7	5.58	2185	2	0	0	453.747	905.479	2	905.479	-0.0001	1	19.14	230	K	FICPNKK	S	Carbamidomethyl (C)	0.0010000.0	Cmpd 32, AutoMSn(453.7469), 11.5 min
73	gi|380875419	RecName: Full=Alpha-fibrinogenase albofibrase; AltName: Full=Snake venom serine protease; Short=SVSP; Flags: Precursor [Trimeresurus albolabris]	78	27983	6	1	4	1	16.7	5.58	2187	1	0	0	453.749	905.484	2	905.479	0.0046	1	34.08	7.5	K	FICPNKK	S	Carbamidomethyl (C)	0.0010000.0	Cmpd 35, AutoMSn(453.7492), 11.6 min
73	gi|380875419	RecName: Full=Alpha-fibrinogenase albofibrase; AltName: Full=Snake venom serine protease; Short=SVSP; Flags: Precursor [Trimeresurus albolabris]	78	27983	6	1	4	1	16.7	5.58	2188	1	0	0	453.75	905.486	2	905.479	0.0073	1	22.41	110	K	FICPNKK	S	Carbamidomethyl (C)	0.0010000.0	Cmpd 38, AutoMSn(453.7506), 11.7 min
73	gi|380875419	RecName: Full=Alpha-fibrinogenase albofibrase; AltName: Full=Snake venom serine protease; Short=SVSP; Flags: Precursor [Trimeresurus albolabris]	78	27983	6	1	4	1	16.7	5.58	2766	1	1	0	552.301	1102.59	2	1102.58	0.0066	0	46.3	0.43	R	TLCAGIVQGGK	D	Carbamidomethyl (C)	0.00100000000.0	Cmpd 223, AutoMSn(552.3008), 15.8 min
73	gi|380875419	RecName: Full=Alpha-fibrinogenase albofibrase; AltName: Full=Snake venom serine protease; Short=SVSP; Flags: Precursor [Trimeresurus albolabris]	78	27983	6	1	4	1	16.7	5.58	4253	1	1	1	490.269	1467.78	3	1467.77	0.0164	1	77.58	0.00025	K	LLNEDEQIRNPK	E			Cmpd 166, AutoMSn(490.2688), 14.5 min
73	gi|380875419	RecName: Full=Alpha-fibrinogenase albofibrase; AltName: Full=Snake venom serine protease; Short=SVSP; Flags: Precursor [Trimeresurus albolabris]	78	27983	6	1	4	1	16.7	5.58	4418	1	1	1	511.094	1530.26	3	1530.83	-0.5735	1	33.54	13	K	SNEILDKDIMLIK	L			Cmpd 454, AutoMSn(511.0937), 21.0 min	emPAI	0.12
74	gi|2851436	RecName: Full=Snaclec coagulation factor IX/factor X-binding protein subunit B; Short=IX/X-bp subunit B; Flags: Precursor [Protobothrops flavoviridis]	76	16911	2	2	1	1	8.2	6.4	4483	1	1	1	776.847	1551.68	2	1551.67	0.0087	0	56.29	0.034	K	AWAEESYCVYFK	S	Carbamidomethyl (C)	0.000000010000.0	Cmpd 500, AutoMSn(776.8468), 21.4 min
74	gi|2851436	RecName: Full=Snaclec coagulation factor IX/factor X-binding protein subunit B; Short=IX/X-bp subunit B; Flags: Precursor [Protobothrops flavoviridis]	76	16911	2	2	1	1	8.2	6.4	4484	1	1	1	776.848	1551.68	2	1551.67	0.0114	0	58.66	0.02	K	AWAEESYCVYFK	S	Carbamidomethyl (C)	0.000000010000.0	Cmpd 502, AutoMSn(776.8482), 21.5 min	emPAI	0.2
75	gi|13959619	RecName: Full=Snake venom serine protease 2B; Short=SVSP 2B; Flags: Precursor [Trimeresurus gramineus]	71	28915	15	1	3	1	17.3	5.54	1677	1	1	0	791.464	790.457	1	790.459	-0.0021	0	30.86	17	R	VPALYTK	V			Cmpd 197, AutoMSn(791.4640), 15.2 min
75	gi|13959619	RecName: Full=Snake venom serine protease 2B; Short=SVSP 2B; Flags: Precursor [Trimeresurus gramineus]	71	28915	15	1	3	1	17.3	5.54	1678	1	1	0	791.465	790.458	1	790.459	-0.0013	0	28.24	32	R	VPALYTK	V			Cmpd 193, AutoMSn(791.4648), 15.1 min
75	gi|13959619	RecName: Full=Snake venom serine protease 2B; Short=SVSP 2B; Flags: Precursor [Trimeresurus gramineus]	71	28915	15	1	3	1	17.3	5.54	1679	1	1	0	396.239	790.463	2	790.459	0.0037	0	40.34	2	R	VPALYTK	V			Cmpd 189, AutoMSn(396.2386), 15.2 min
75	gi|13959619	RecName: Full=Snake venom serine protease 2B; Short=SVSP 2B; Flags: Precursor [Trimeresurus gramineus]	71	28915	15	1	3	1	17.3	5.54	1680	1	1	0	396.239	790.463	2	790.459	0.0046	0	31.15	16	R	VPALYTK	V			Cmpd 195, AutoMSn(396.2390), 15.2 min
75	gi|13959619	RecName: Full=Snake venom serine protease 2B; Short=SVSP 2B; Flags: Precursor [Trimeresurus gramineus]	71	28915	15	1	3	1	17.3	5.54	1681	1	1	0	396.239	790.464	2	790.459	0.0052	0	31.85	14	R	VPALYTK	V			Cmpd 192, AutoMSn(396.2393), 15.1 min
75	gi|13959619	RecName: Full=Snake venom serine protease 2B; Short=SVSP 2B; Flags: Precursor [Trimeresurus gramineus]	71	28915	15	1	3	1	17.3	5.54	1682	1	1	0	396.24	790.465	2	790.459	0.0057	0	24.34	78	R	VPALYTK	V			Cmpd 186, AutoMSn(396.2396), 15.1 min
75	gi|13959619	RecName: Full=Snake venom serine protease 2B; Short=SVSP 2B; Flags: Precursor [Trimeresurus gramineus]	71	28915	15	1	3	1	17.3	5.54	1683	2	1	0	396.24	790.465	2	790.459	0.0065	0	29.73	23	R	VPALYTK	V			Cmpd 240, AutoMSn(396.2400), 15.2 min
75	gi|13959619	RecName: Full=Snake venom serine protease 2B; Short=SVSP 2B; Flags: Precursor [Trimeresurus gramineus]	71	28915	15	1	3	1	17.3	5.54	4964	1	1	1	861.901	1721.79	2	1721.78	0.0043	0	41.76	0.95	R	TLCAGVLQGGTDTCNR	D	2 Carbamidomethyl (C)	0.0010000000000100.0	Cmpd 296, AutoMSn(861.9007), 17.4 min
75	gi|13959619	RecName: Full=Snake venom serine protease 2B; Short=SVSP 2B; Flags: Precursor [Trimeresurus gramineus]	71	28915	15	1	3	1	17.3	5.54	4967	1	1	1	861.904	1721.79	2	1721.78	0.0101	0	63.18	0.0068	R	TLCAGVLQGGTDTCNR	D	2 Carbamidomethyl (C)	0.0010000000000100.0	Cmpd 292, AutoMSn(861.9036), 17.4 min
75	gi|13959619	RecName: Full=Snake venom serine protease 2B; Short=SVSP 2B; Flags: Precursor [Trimeresurus gramineus]	71	28915	15	1	3	1	17.3	5.54	6312	1	1	1	1220.58	2439.15	2	2439.15	-0.0016	0	41.28	0.75	K	VFDHLDWIQSIIAGNTDAACPP	-	Carbamidomethyl (C)	0.0000000000000000000100.0	Cmpd 749, AutoMSn(1220.5829), 29.6 min
75	gi|13959619	RecName: Full=Snake venom serine protease 2B; Short=SVSP 2B; Flags: Precursor [Trimeresurus gramineus]	71	28915	15	1	3	1	17.3	5.54	6314	3	1	1	814.061	2439.16	3	2439.15	0.0081	0	25.23	30	K	VFDHLDWIQSIIAGNTDAACPP	-	Carbamidomethyl (C)	0.0000000000000000000100.0	Cmpd 747, AutoMSn(814.0609), 29.7 min
75	gi|13959619	RecName: Full=Snake venom serine protease 2B; Short=SVSP 2B; Flags: Precursor [Trimeresurus gramineus]	71	28915	15	1	3	1	17.3	5.54	6315	1	1	1	814.063	2439.17	3	2439.15	0.0154	0	25.63	27	K	VFDHLDWIQSIIAGNTDAACPP	-	Carbamidomethyl (C)	0.0000000000000000000100.0	Cmpd 740, AutoMSn(814.0634), 29.6 min
75	gi|13959619	RecName: Full=Snake venom serine protease 2B; Short=SVSP 2B; Flags: Precursor [Trimeresurus gramineus]	71	28915	15	1	3	1	17.3	5.54	6317	1	1	1	814.066	2439.18	3	2439.15	0.0243	0	35.24	3	K	VFDHLDWIQSIIAGNTDAACPP	-	Carbamidomethyl (C)	0.0000000000000000000100.0	Cmpd 748, AutoMSn(814.0664), 29.6 min
75	gi|13959619	RecName: Full=Snake venom serine protease 2B; Short=SVSP 2B; Flags: Precursor [Trimeresurus gramineus]	71	28915	15	1	3	1	17.3	5.54	6318	5	1	1	814.067	2439.18	3	2439.15	0.0267	0	17.75	170	K	VFDHLDWIQSIIAGNTDAACPP	-	Carbamidomethyl (C)	0.0000000000000000000100.0	Cmpd 746, AutoMSn(814.0671), 29.7 min
75	gi|13959619	RecName: Full=Snake venom serine protease 2B; Short=SVSP 2B; Flags: Precursor [Trimeresurus gramineus]	71	28915	15	1	3	1	17.3	5.54	6319	1	1	1	814.067	2439.18	3	2439.15	0.0268	0	33.83	4.1	K	VFDHLDWIQSIIAGNTDAACPP	-	Carbamidomethyl (C)	0.0000000000000000000100.0	Cmpd 744, AutoMSn(814.0672), 29.6 min	emPAI	0.39
76	gi|498926319	PREDICTED: endonuclease domain-containing 1 protein-like [Maylandia zebra]	70	41477	5	1	1	1	4.2	7.1	4955	1	1	1	861.495	1720.97	2	1720.87	0.1038	0	57.88	0.027	K	EATFTLTNIVPQMEK	F			Cmpd 719, AutoMSn(861.4945), 27.3 min
76	gi|498926319	PREDICTED: endonuclease domain-containing 1 protein-like [Maylandia zebra]	70	41477	5	1	1	1	4.2	7.1	4956	1	1	1	861.498	1720.98	2	1720.87	0.1102	0	26.9	34	K	EATFTLTNIVPQMEK	F			Cmpd 722, AutoMSn(861.4976), 27.4 min
76	gi|498926319	PREDICTED: endonuclease domain-containing 1 protein-like [Maylandia zebra]	70	41477	5	1	1	1	4.2	7.1	4957	1	1	1	861.498	1720.98	2	1720.87	0.1113	0	44.84	0.55	K	EATFTLTNIVPQMEK	F			Cmpd 696, AutoMSn(861.4982), 27.3 min
76	gi|498926319	PREDICTED: endonuclease domain-containing 1 protein-like [Maylandia zebra]	70	41477	5	1	1	1	4.2	7.1	4962	1	1	1	861.502	1720.99	2	1720.87	0.1184	0	47.29	0.32	K	EATFTLTNIVPQMEK	F			Cmpd 718, AutoMSn(861.5018), 27.3 min
76	gi|498926319	PREDICTED: endonuclease domain-containing 1 protein-like [Maylandia zebra]	70	41477	5	1	1	1	4.2	7.1	4963	2	1	1	574.671	1720.99	3	1720.87	0.1216	0	24.46	62	K	EATFTLTNIVPQMEK	F			Cmpd 699, AutoMSn(574.6713), 27.3 min	emPAI	0.08
77	gi|690452469	PREDICTED: protein BTG2 [Pygoscelis adeliae]	67	22291	4	0	1	0	4.4	9.04	2266	1	1	1	948.481	947.474	1	947.482	-0.0088	0	13.3	880	K	FGDGNLLGR	G			Cmpd 411, AutoMSn(948.4810), 19.0 min
77	gi|690452469	PREDICTED: protein BTG2 [Pygoscelis adeliae]	67	22291	4	0	1	0	4.4	9.04	2268	1	1	1	474.751	947.487	2	947.482	0.0043	0	32.58	10	K	FGDGNLLGR	G			Cmpd 412, AutoMSn(474.7507), 19.1 min
77	gi|690452469	PREDICTED: protein BTG2 [Pygoscelis adeliae]	67	22291	4	0	1	0	4.4	9.04	2269	1	1	1	474.751	947.488	2	947.482	0.0051	0	52.08	0.12	K	FGDGNLLGR	G			Cmpd 407, AutoMSn(474.7511), 18.9 min
77	gi|690452469	PREDICTED: protein BTG2 [Pygoscelis adeliae]	67	22291	4	0	1	0	4.4	9.04	2270	1	1	1	474.752	947.488	2	947.482	0.006	0	52.17	0.11	K	FGDGNLLGR	G			Cmpd 410, AutoMSn(474.7515), 19.0 min	emPAI	0.15
78	gi|338855326	metalloproteinase 9 [Crotalus adamanteus]	65	32690	28	0	2	0	7	4.48	2545	1	0	0	1056.46	1055.45	1	1055.46	-0.0058	0	28.68	23	R	QCVDVTTAY	-	Carbamidomethyl (C)	0.010000000.0	Cmpd 339, AutoMSn(1056.4608), 18.4 min
78	gi|338855326	metalloproteinase 9 [Crotalus adamanteus]	65	32690	28	0	2	0	7	4.48	2546	1	0	0	1056.46	1055.45	1	1055.46	-0.0057	0	33.37	7.9	R	QCVDVTTAY	-	Carbamidomethyl (C)	0.010000000.0	Cmpd 342, AutoMSn(1056.4610), 18.5 min
78	gi|338855326	metalloproteinase 9 [Crotalus adamanteus]	65	32690	28	0	2	0	7	4.48	2547	1	0	0	1056.46	1055.45	1	1055.46	-0.005	0	28.83	22	R	QCVDVTTAY	-	Carbamidomethyl (C)	0.010000000.0	Cmpd 334, AutoMSn(1056.4617), 18.4 min
78	gi|338855326	metalloproteinase 9 [Crotalus adamanteus]	65	32690	28	0	2	0	7	4.48	2549	1	0	0	1056.46	1055.45	1	1055.46	-0.0049	0	32.52	9.6	R	QCVDVTTAY	-	Carbamidomethyl (C)	0.010000000.0	Cmpd 349, AutoMSn(1056.4618), 18.6 min
78	gi|338855326	metalloproteinase 9 [Crotalus adamanteus]	65	32690	28	0	2	0	7	4.48	2550	1	0	0	1056.46	1055.45	1	1055.46	-0.0047	0	36.63	3.7	R	QCVDVTTAY	-	Carbamidomethyl (C)	0.010000000.0	Cmpd 345, AutoMSn(1056.4619), 18.6 min
78	gi|338855326	metalloproteinase 9 [Crotalus adamanteus]	65	32690	28	0	2	0	7	4.48	2552	1	0	0	1056.46	1055.46	1	1055.46	-0.004	0	28.35	25	R	QCVDVTTAY	-	Carbamidomethyl (C)	0.010000000.0	Cmpd 388, AutoMSn(1056.4626), 18.5 min
78	gi|338855326	metalloproteinase 9 [Crotalus adamanteus]	65	32690	28	0	2	0	7	4.48	2555	1	0	0	1056.46	1055.46	1	1055.46	-0.0021	0	30.06	17	R	QCVDVTTAY	-	Carbamidomethyl (C)	0.010000000.0	Cmpd 391, AutoMSn(1056.4645), 18.6 min
78	gi|338855326	metalloproteinase 9 [Crotalus adamanteus]	65	32690	28	0	2	0	7	4.48	2556	1	0	0	1056.46	1055.46	1	1055.46	-0.002	0	31.31	13	R	QCVDVTTAY	-	Carbamidomethyl (C)	0.010000000.0	Cmpd 335, AutoMSn(1056.4646), 18.5 min
78	gi|338855326	metalloproteinase 9 [Crotalus adamanteus]	65	32690	28	0	2	0	7	4.48	2557	1	0	0	1056.46	1055.46	1	1055.46	-0.0019	0	36.08	4.2	R	QCVDVTTAY	-	Carbamidomethyl (C)	0.010000000.0	Cmpd 338, AutoMSn(1056.4647), 18.6 min
78	gi|338855326	metalloproteinase 9 [Crotalus adamanteus]	65	32690	28	0	2	0	7	4.48	2558	1	0	0	1056.47	1055.46	1	1055.46	-0.0009	0	21.7	120	R	QCVDVTTAY	-	Carbamidomethyl (C)	0.010000000.0	Cmpd 346, AutoMSn(1056.4658), 18.6 min
78	gi|338855326	metalloproteinase 9 [Crotalus adamanteus]	65	32690	28	0	2	0	7	4.48	2559	7	0	0	528.737	1055.46	2	1055.46	-0.0003	0	11.31	1300	R	QCVDVTTAY	-	Carbamidomethyl (C)	0.010000000.0	Cmpd 314, AutoMSn(528.7368), 18.4 min
78	gi|338855326	metalloproteinase 9 [Crotalus adamanteus]	65	32690	28	0	2	0	7	4.48	2562	1	0	0	528.738	1055.46	2	1055.46	0.0025	0	13.63	740	R	QCVDVTTAY	-	Carbamidomethyl (C)	0.010000000.0	Cmpd 389, AutoMSn(528.7382), 18.5 min
78	gi|338855326	metalloproteinase 9 [Crotalus adamanteus]	65	32690	28	0	2	0	7	4.48	2564	3	0	0	528.739	1055.46	2	1055.46	0.004	0	12.67	920	R	QCVDVTTAY	-	Carbamidomethyl (C)	0.010000000.0	Cmpd 347, AutoMSn(528.7390), 18.6 min
78	gi|338855326	metalloproteinase 9 [Crotalus adamanteus]	65	32690	28	0	2	0	7	4.48	2567	1	0	0	528.739	1055.46	2	1055.46	0.0046	0	19.89	170	R	QCVDVTTAY	-	Carbamidomethyl (C)	0.010000000.0	Cmpd 339, AutoMSn(528.7393), 18.6 min
78	gi|338855326	metalloproteinase 9 [Crotalus adamanteus]	65	32690	28	0	2	0	7	4.48	2569	1	0	0	528.74	1055.46	2	1055.46	0.0056	0	19.76	180	R	QCVDVTTAY	-	Carbamidomethyl (C)	0.010000000.0	Cmpd 346, AutoMSn(528.7398), 18.6 min
78	gi|338855326	metalloproteinase 9 [Crotalus adamanteus]	65	32690	28	0	2	0	7	4.48	2574	1	0	0	528.74	1055.47	2	1055.46	0.0068	0	16.37	390	R	QCVDVTTAY	-	Carbamidomethyl (C)	0.010000000.0	Cmpd 336, AutoMSn(528.7404), 18.5 min
78	gi|338855326	metalloproteinase 9 [Crotalus adamanteus]	65	32690	28	0	2	0	7	4.48	2575	1	0	0	528.74	1055.47	2	1055.46	0.0068	0	35.03	5.3	R	QCVDVTTAY	-	Carbamidomethyl (C)	0.010000000.0	Cmpd 343, AutoMSn(528.7404), 18.5 min
78	gi|338855326	metalloproteinase 9 [Crotalus adamanteus]	65	32690	28	0	2	0	7	4.48	2576	7	0	0	528.741	1055.47	2	1055.46	0.0072	0	12.03	1100	R	QCVDVTTAY	-	Carbamidomethyl (C)	0.010000000.0	Cmpd 386, AutoMSn(528.7406), 18.5 min
78	gi|338855326	metalloproteinase 9 [Crotalus adamanteus]	65	32690	28	0	2	0	7	4.48	2578	4	0	0	528.744	1055.47	2	1055.46	0.0149	0	13.41	770	R	QCVDVTTAY	-	Carbamidomethyl (C)	0.010000000.0	Cmpd 315, AutoMSn(528.7444), 18.5 min
78	gi|338855326	metalloproteinase 9 [Crotalus adamanteus]	65	32690	28	0	2	0	7	4.48	3765	1	1	1	445.894	1334.66	3	1334.65	0.0094	0	28.26	24	K	FTSAGNVCRPAR	S	Carbamidomethyl (C)	0.000000010000.0	Cmpd 26, AutoMSn(445.8942), 12.6 min
78	gi|338855326	metalloproteinase 9 [Crotalus adamanteus]	65	32690	28	0	2	0	7	4.48	3767	1	1	1	445.895	1334.66	3	1334.65	0.012	0	32.53	8.9	K	FTSAGNVCRPAR	S	Carbamidomethyl (C)	0.000000010000.0	Cmpd 127, AutoMSn(445.8951), 12.7 min
78	gi|338855326	metalloproteinase 9 [Crotalus adamanteus]	65	32690	28	0	2	0	7	4.48	3768	2	1	1	445.895	1334.66	3	1334.65	0.012	0	21.13	120	K	FTSAGNVCRPAR	S	Carbamidomethyl (C)	0.000000010000.0	Cmpd 130, AutoMSn(445.8951), 12.7 min
78	gi|338855326	metalloproteinase 9 [Crotalus adamanteus]	65	32690	28	0	2	0	7	4.48	3770	1	1	1	445.896	1334.67	3	1334.65	0.0141	0	35.59	4.4	K	FTSAGNVCRPAR	S	Carbamidomethyl (C)	0.000000010000.0	Cmpd 84, AutoMSn(445.8958), 12.7 min
78	gi|338855326	metalloproteinase 9 [Crotalus adamanteus]	65	32690	28	0	2	0	7	4.48	3771	7	1	1	445.896	1334.67	3	1334.65	0.016	0	17.31	290	K	FTSAGNVCRPAR	S	Carbamidomethyl (C)	0.000000010000.0	Cmpd 87, AutoMSn(445.8964), 12.7 min
78	gi|338855326	metalloproteinase 9 [Crotalus adamanteus]	65	32690	28	0	2	0	7	4.48	3772	1	1	1	445.897	1334.67	3	1334.65	0.0168	0	49.06	0.2	K	FTSAGNVCRPAR	S	Carbamidomethyl (C)	0.000000010000.0	Cmpd 82, AutoMSn(445.8967), 12.6 min
78	gi|338855326	metalloproteinase 9 [Crotalus adamanteus]	65	32690	28	0	2	0	7	4.48	3773	3	1	1	445.897	1334.67	3	1334.65	0.0173	0	20.21	150	K	FTSAGNVCRPAR	S	Carbamidomethyl (C)	0.000000010000.0	Cmpd 12, AutoMSn(445.8968), 12.6 min
78	gi|338855326	metalloproteinase 9 [Crotalus adamanteus]	65	32690	28	0	2	0	7	4.48	3774	1	1	1	445.897	1334.67	3	1334.65	0.0188	0	49.01	0.2	K	FTSAGNVCRPAR	S	Carbamidomethyl (C)	0.000000010000.0	Cmpd 77, AutoMSn(445.8973), 12.7 min
78	gi|338855326	metalloproteinase 9 [Crotalus adamanteus]	65	32690	28	0	2	0	7	4.48	3775	5	1	1	445.897	1334.67	3	1334.65	0.0193	0	15.5	450	K	FTSAGNVCRPAR	S	Carbamidomethyl (C)	0.000000010000.0	Cmpd 54, AutoMSn(445.8975), 12.6 min	emPAI	0.34
79	gi|109099462	PREDICTED: keratin, type II cytoskeletal 6B-like [Macaca mulatta]	62	33576	6	0	3	0	10	5.23	2785	1	0	0	554.276	1106.54	2	1106.54	0.0022	0	27.05	35	K	AQYEEIAQR	S			Cmpd 131, AutoMSn(554.2762), 14.3 min
79	gi|109099462	PREDICTED: keratin, type II cytoskeletal 6B-like [Macaca mulatta]	62	33576	6	0	3	0	10	5.23	2786	1	0	0	554.277	1106.54	2	1106.54	0.0038	0	41.08	1.4	K	AQYEEIAQR	S			Cmpd 157, AutoMSn(554.2770), 14.3 min
79	gi|109099462	PREDICTED: keratin, type II cytoskeletal 6B-like [Macaca mulatta]	62	33576	6	0	3	0	10	5.23	3087	1	0	0	590.305	1178.59	2	1178.59	0.0016	0	21.63	110	K	YEELQITAGR	H			Cmpd 273, AutoMSn(590.3046), 17.5 min
79	gi|109099462	PREDICTED: keratin, type II cytoskeletal 6B-like [Macaca mulatta]	62	33576	6	0	3	0	10	5.23	3089	1	0	0	590.307	1178.6	2	1178.59	0.0061	0	51.09	0.13	K	YEELQITAGR	H			Cmpd 302, AutoMSn(590.3069), 17.6 min
79	gi|109099462	PREDICTED: keratin, type II cytoskeletal 6B-like [Macaca mulatta]	62	33576	6	0	3	0	10	5.23	3709	1	0	0	665.368	1328.72	2	1328.72	0.0021	0	46.62	0.36	R	NLDLDSIIAEVK	A			Cmpd 652, AutoMSn(665.3677), 25.9 min
79	gi|109099462	PREDICTED: keratin, type II cytoskeletal 6B-like [Macaca mulatta]	62	33576	6	0	3	0	10	5.23	3710	1	0	0	665.37	1328.73	2	1328.72	0.0068	0	46.17	0.4	R	NLDLDSIIAEVK	A			Cmpd 656, AutoMSn(665.3700), 26.0 min	emPAI	0.33
80	gi|431921654	Keratin, type II cytoskeletal 6C, partial [Pteropus alecto]	62	60721	6	0	3	0	5.4	8.52	2785	1	0	0	554.276	1106.54	2	1106.54	0.0022	0	27.05	35	K	AQYEEIAQR	S			Cmpd 131, AutoMSn(554.2762), 14.3 min
80	gi|431921654	Keratin, type II cytoskeletal 6C, partial [Pteropus alecto]	62	60721	6	0	3	0	5.4	8.52	2786	1	0	0	554.277	1106.54	2	1106.54	0.0038	0	41.08	1.4	K	AQYEEIAQR	S			Cmpd 157, AutoMSn(554.2770), 14.3 min
80	gi|431921654	Keratin, type II cytoskeletal 6C, partial [Pteropus alecto]	62	60721	6	0	3	0	5.4	8.52	3087	1	0	0	590.305	1178.59	2	1178.59	0.0016	0	21.63	110	K	YEELQLTAGR	H			Cmpd 273, AutoMSn(590.3046), 17.5 min
80	gi|431921654	Keratin, type II cytoskeletal 6C, partial [Pteropus alecto]	62	60721	6	0	3	0	5.4	8.52	3089	1	0	0	590.307	1178.6	2	1178.59	0.0061	0	51.09	0.13	K	YEELQLTAGR	H			Cmpd 302, AutoMSn(590.3069), 17.6 min
80	gi|431921654	Keratin, type II cytoskeletal 6C, partial [Pteropus alecto]	62	60721	6	0	3	0	5.4	8.52	3709	1	0	0	665.368	1328.72	2	1328.72	0.0021	0	46.62	0.36	R	NLDLDSIIAEVK	A			Cmpd 652, AutoMSn(665.3677), 25.9 min
80	gi|431921654	Keratin, type II cytoskeletal 6C, partial [Pteropus alecto]	62	60721	6	0	3	0	5.4	8.52	3710	1	0	0	665.37	1328.73	2	1328.72	0.0068	0	46.17	0.4	R	NLDLDSIIAEVK	A			Cmpd 656, AutoMSn(665.3700), 26.0 min	emPAI	0.17
81	gi|297593832	metalloproteinase [Echis carinatus sochureki]	61	47162	12	1	3	1	5.2	7.84	2598	1	1	1	531.244	1060.47	2	1060.48	-0.0055	0	57.64	0.031	R	APVSGMCSPR	R	Carbamidomethyl (C)	0.0000001000.0	Cmpd 169, AutoMSn(531.2442), 13.6 min
81	gi|297593832	metalloproteinase [Echis carinatus sochureki]	61	47162	12	1	3	1	5.2	7.84	2599	1	1	1	531.245	1060.47	2	1060.48	-0.0044	0	25.99	45	R	APVSGMCSPR	R	Carbamidomethyl (C)	0.0000001000.0	Cmpd 167, AutoMSn(531.2448), 13.5 min
81	gi|297593832	metalloproteinase [Echis carinatus sochureki]	61	47162	12	1	3	1	5.2	7.84	3160	2	0	1	596.784	1191.55	2	1191.51	0.0414	0	22.09	100	K	CADGAVCNINR	H	Carbamidomethyl (C)	0.10000000000.0	Cmpd 62, AutoMSn(596.7842), 12.2 min
81	gi|297593832	metalloproteinase [Echis carinatus sochureki]	61	47162	12	1	3	1	5.2	7.84	3161	2	0	1	398.193	1191.56	3	1191.51	0.046	0	20.83	140	K	CADGAVCNINR	H	Carbamidomethyl (C)	0.10000000000.0	Cmpd 58, AutoMSn(398.1934), 12.1 min
81	gi|297593832	metalloproteinase [Echis carinatus sochureki]	61	47162	12	1	3	1	5.2	7.84	3162	7	0	1	596.787	1191.56	2	1191.51	0.0464	0	13.19	790	K	CADGAVCNINR	H	Carbamidomethyl (C)	0.10000000000.0	Cmpd 105, AutoMSn(596.7867), 12.1 min
81	gi|297593832	metalloproteinase [Echis carinatus sochureki]	61	47162	12	1	3	1	5.2	7.84	3163	2	0	1	398.194	1191.56	3	1191.51	0.0464	0	27.88	27	K	CADGAVCNINR	H	Carbamidomethyl (C)	0.10000000000.0	Cmpd 50, AutoMSn(398.1936), 12.1 min
81	gi|297593832	metalloproteinase [Echis carinatus sochureki]	61	47162	12	1	3	1	5.2	7.84	3164	2	0	1	398.194	1191.56	3	1191.51	0.0479	0	30.51	15	K	CADGAVCNINR	H	Carbamidomethyl (C)	0.10000000000.0	Cmpd 60, AutoMSn(398.1941), 12.2 min
81	gi|297593832	metalloproteinase [Echis carinatus sochureki]	61	47162	12	1	3	1	5.2	7.84	3255	1	1	1	609.297	1216.58	2	1216.58	-0.002	1	25.97	42	R	APVSGMCSPRR	S	Carbamidomethyl (C)	0.00000010000.0	Cmpd 122, AutoMSn(609.2965), 12.5 min
81	gi|297593832	metalloproteinase [Echis carinatus sochureki]	61	47162	12	1	3	1	5.2	7.84	3256	2	1	1	406.534	1216.58	3	1216.58	-0.0011	1	27.71	28	R	APVSGMCSPRR	S	Carbamidomethyl (C)	0.00000010000.0	Cmpd 108, AutoMSn(406.5338), 12.6 min
81	gi|297593832	metalloproteinase [Echis carinatus sochureki]	61	47162	12	1	3	1	5.2	7.84	3257	1	1	1	406.535	1216.58	3	1216.58	0.0028	1	26.97	34	R	APVSGMCSPRR	S	Carbamidomethyl (C)	0.00000010000.0	Cmpd 65, AutoMSn(406.5350), 12.5 min
81	gi|297593832	metalloproteinase [Echis carinatus sochureki]	61	47162	12	1	3	1	5.2	7.84	3258	1	1	1	406.535	1216.58	3	1216.58	0.0029	1	40.41	1.5	R	APVSGMCSPRR	S	Carbamidomethyl (C)	0.00000010000.0	Cmpd 121, AutoMSn(406.5351), 12.5 min
81	gi|297593832	metalloproteinase [Echis carinatus sochureki]	61	47162	12	1	3	1	5.2	7.84	3259	2	1	1	406.535	1216.58	3	1216.58	0.0039	1	15.85	440	R	APVSGMCSPRR	S	Carbamidomethyl (C)	0.00000010000.0	Cmpd 126, AutoMSn(406.5354), 12.6 min	emPAI	0.14
82	gi|14017762	larva-specific keratin RLK [Rana catesbeiana]	58	57327	4	0	2	0	3.8	6.23	2785	1	0	0	554.276	1106.54	2	1106.57	-0.0341	1	27.05	35	K	AQYEEIAKR	S			Cmpd 131, AutoMSn(554.2762), 14.3 min
82	gi|14017762	larva-specific keratin RLK [Rana catesbeiana]	58	57327	4	0	2	0	3.8	6.23	2786	1	0	0	554.277	1106.54	2	1106.57	-0.0326	1	41.08	1.4	K	AQYEEIAKR	S			Cmpd 157, AutoMSn(554.2770), 14.3 min
82	gi|14017762	larva-specific keratin RLK [Rana catesbeiana]	58	57327	4	0	2	0	3.8	6.23	3709	1	0	0	665.368	1328.72	2	1328.72	0.0021	0	46.62	0.36	R	NLDLDSIIAEVK	A			Cmpd 652, AutoMSn(665.3677), 25.9 min
82	gi|14017762	larva-specific keratin RLK [Rana catesbeiana]	58	57327	4	0	2	0	3.8	6.23	3710	1	0	0	665.37	1328.73	2	1328.72	0.0068	0	46.17	0.4	R	NLDLDSIIAEVK	A			Cmpd 656, AutoMSn(665.3700), 26.0 min	emPAI	0.12
83	gi|620941687	PREDICTED: LOW QUALITY PROTEIN: putative ATP-dependent RNA helicase DHX57 [Ornithorhynchus anatinus]	57	102439	1	1	1	1	1.7	5.69	4450	1	1	1	771.426	1540.84	2	1540.77	0.066	1	56.55	0.032	K	RRPSSPGAESGVGER	G			Cmpd 456, AutoMSn(771.4256), 20.1 min	emPAI	0.03
84	gi|109254964	metalloproteinase isoform 3 [Sistrurus catenatus edwardsi]	56	67339	22	0	2	0	3.2	5.26	2545	1	0	0	1056.46	1055.45	1	1055.46	-0.0058	0	28.68	23	R	QCVDVTTAY	-	Carbamidomethyl (C)	0.010000000.0	Cmpd 339, AutoMSn(1056.4608), 18.4 min
84	gi|109254964	metalloproteinase isoform 3 [Sistrurus catenatus edwardsi]	56	67339	22	0	2	0	3.2	5.26	2546	1	0	0	1056.46	1055.45	1	1055.46	-0.0057	0	33.37	7.9	R	QCVDVTTAY	-	Carbamidomethyl (C)	0.010000000.0	Cmpd 342, AutoMSn(1056.4610), 18.5 min
84	gi|109254964	metalloproteinase isoform 3 [Sistrurus catenatus edwardsi]	56	67339	22	0	2	0	3.2	5.26	2547	1	0	0	1056.46	1055.45	1	1055.46	-0.005	0	28.83	22	R	QCVDVTTAY	-	Carbamidomethyl (C)	0.010000000.0	Cmpd 334, AutoMSn(1056.4617), 18.4 min
84	gi|109254964	metalloproteinase isoform 3 [Sistrurus catenatus edwardsi]	56	67339	22	0	2	0	3.2	5.26	2549	1	0	0	1056.46	1055.45	1	1055.46	-0.0049	0	32.52	9.6	R	QCVDVTTAY	-	Carbamidomethyl (C)	0.010000000.0	Cmpd 349, AutoMSn(1056.4618), 18.6 min
84	gi|109254964	metalloproteinase isoform 3 [Sistrurus catenatus edwardsi]	56	67339	22	0	2	0	3.2	5.26	2550	1	0	0	1056.46	1055.45	1	1055.46	-0.0047	0	36.63	3.7	R	QCVDVTTAY	-	Carbamidomethyl (C)	0.010000000.0	Cmpd 345, AutoMSn(1056.4619), 18.6 min
84	gi|109254964	metalloproteinase isoform 3 [Sistrurus catenatus edwardsi]	56	67339	22	0	2	0	3.2	5.26	2552	1	0	0	1056.46	1055.46	1	1055.46	-0.004	0	28.35	25	R	QCVDVTTAY	-	Carbamidomethyl (C)	0.010000000.0	Cmpd 388, AutoMSn(1056.4626), 18.5 min
84	gi|109254964	metalloproteinase isoform 3 [Sistrurus catenatus edwardsi]	56	67339	22	0	2	0	3.2	5.26	2555	1	0	0	1056.46	1055.46	1	1055.46	-0.0021	0	30.06	17	R	QCVDVTTAY	-	Carbamidomethyl (C)	0.010000000.0	Cmpd 391, AutoMSn(1056.4645), 18.6 min
84	gi|109254964	metalloproteinase isoform 3 [Sistrurus catenatus edwardsi]	56	67339	22	0	2	0	3.2	5.26	2556	1	0	0	1056.46	1055.46	1	1055.46	-0.002	0	31.31	13	R	QCVDVTTAY	-	Carbamidomethyl (C)	0.010000000.0	Cmpd 335, AutoMSn(1056.4646), 18.5 min
84	gi|109254964	metalloproteinase isoform 3 [Sistrurus catenatus edwardsi]	56	67339	22	0	2	0	3.2	5.26	2557	1	0	0	1056.46	1055.46	1	1055.46	-0.0019	0	36.08	4.2	R	QCVDVTTAY	-	Carbamidomethyl (C)	0.010000000.0	Cmpd 338, AutoMSn(1056.4647), 18.6 min
84	gi|109254964	metalloproteinase isoform 3 [Sistrurus catenatus edwardsi]	56	67339	22	0	2	0	3.2	5.26	2558	1	0	0	1056.47	1055.46	1	1055.46	-0.0009	0	21.7	120	R	QCVDVTTAY	-	Carbamidomethyl (C)	0.010000000.0	Cmpd 346, AutoMSn(1056.4658), 18.6 min
84	gi|109254964	metalloproteinase isoform 3 [Sistrurus catenatus edwardsi]	56	67339	22	0	2	0	3.2	5.26	2559	7	0	0	528.737	1055.46	2	1055.46	-0.0003	0	11.31	1300	R	QCVDVTTAY	-	Carbamidomethyl (C)	0.010000000.0	Cmpd 314, AutoMSn(528.7368), 18.4 min
84	gi|109254964	metalloproteinase isoform 3 [Sistrurus catenatus edwardsi]	56	67339	22	0	2	0	3.2	5.26	2562	1	0	0	528.738	1055.46	2	1055.46	0.0025	0	13.63	740	R	QCVDVTTAY	-	Carbamidomethyl (C)	0.010000000.0	Cmpd 389, AutoMSn(528.7382), 18.5 min
84	gi|109254964	metalloproteinase isoform 3 [Sistrurus catenatus edwardsi]	56	67339	22	0	2	0	3.2	5.26	2564	3	0	0	528.739	1055.46	2	1055.46	0.004	0	12.67	920	R	QCVDVTTAY	-	Carbamidomethyl (C)	0.010000000.0	Cmpd 347, AutoMSn(528.7390), 18.6 min
84	gi|109254964	metalloproteinase isoform 3 [Sistrurus catenatus edwardsi]	56	67339	22	0	2	0	3.2	5.26	2567	1	0	0	528.739	1055.46	2	1055.46	0.0046	0	19.89	170	R	QCVDVTTAY	-	Carbamidomethyl (C)	0.010000000.0	Cmpd 339, AutoMSn(528.7393), 18.6 min
84	gi|109254964	metalloproteinase isoform 3 [Sistrurus catenatus edwardsi]	56	67339	22	0	2	0	3.2	5.26	2569	1	0	0	528.74	1055.46	2	1055.46	0.0056	0	19.76	180	R	QCVDVTTAY	-	Carbamidomethyl (C)	0.010000000.0	Cmpd 346, AutoMSn(528.7398), 18.6 min
84	gi|109254964	metalloproteinase isoform 3 [Sistrurus catenatus edwardsi]	56	67339	22	0	2	0	3.2	5.26	2574	1	0	0	528.74	1055.47	2	1055.46	0.0068	0	16.37	390	R	QCVDVTTAY	-	Carbamidomethyl (C)	0.010000000.0	Cmpd 336, AutoMSn(528.7404), 18.5 min
84	gi|109254964	metalloproteinase isoform 3 [Sistrurus catenatus edwardsi]	56	67339	22	0	2	0	3.2	5.26	2575	1	0	0	528.74	1055.47	2	1055.46	0.0068	0	35.03	5.3	R	QCVDVTTAY	-	Carbamidomethyl (C)	0.010000000.0	Cmpd 343, AutoMSn(528.7404), 18.5 min
84	gi|109254964	metalloproteinase isoform 3 [Sistrurus catenatus edwardsi]	56	67339	22	0	2	0	3.2	5.26	2576	7	0	0	528.741	1055.47	2	1055.46	0.0072	0	12.03	1100	R	QCVDVTTAY	-	Carbamidomethyl (C)	0.010000000.0	Cmpd 386, AutoMSn(528.7406), 18.5 min
84	gi|109254964	metalloproteinase isoform 3 [Sistrurus catenatus edwardsi]	56	67339	22	0	2	0	3.2	5.26	2578	4	0	0	528.744	1055.47	2	1055.46	0.0149	0	13.41	770	R	QCVDVTTAY	-	Carbamidomethyl (C)	0.010000000.0	Cmpd 315, AutoMSn(528.7444), 18.5 min
84	gi|109254964	metalloproteinase isoform 3 [Sistrurus catenatus edwardsi]	56	67339	22	0	2	0	3.2	5.26	3038	1	1	1	587.802	1173.59	2	1173.59	0.0047	0	24.11	66	R	IFPCAPQDVK	C	Carbamidomethyl (C)	0.0001000000.0	Cmpd 300, AutoMSn(587.8023), 17.6 min
84	gi|109254964	metalloproteinase isoform 3 [Sistrurus catenatus edwardsi]	56	67339	22	0	2	0	3.2	5.26	3039	1	1	1	587.802	1173.59	2	1173.59	0.0048	0	26.17	41	R	IFPCAPQDVK	C	Carbamidomethyl (C)	0.0001000000.0	Cmpd 294, AutoMSn(587.8023), 17.4 min
84	gi|109254964	metalloproteinase isoform 3 [Sistrurus catenatus edwardsi]	56	67339	22	0	2	0	3.2	5.26	3041	1	1	1	587.803	1173.59	2	1173.59	0.0061	0	31.5	12	R	IFPCAPQDVK	C	Carbamidomethyl (C)	0.0001000000.0	Cmpd 297, AutoMSn(587.8029), 17.5 min	emPAI	0.1
85	gi|327264443	PREDICTED: keratin, type II cytoskeletal cochleal-like [Anolis carolinensis]	55	56610	4	0	2	0	4	5.88	2613	7	0	1	533.268	1064.52	2	1064.51	0.0075	0	15.62	460	K	AQYEEIANK	S			Cmpd 109, AutoMSn(533.2679), 13.8 min
85	gi|327264443	PREDICTED: keratin, type II cytoskeletal cochleal-like [Anolis carolinensis]	55	56610	4	0	2	0	4	5.88	2614	5	0	1	533.269	1064.52	2	1064.51	0.0086	0	18.6	230	K	AQYEEIANK	S			Cmpd 113, AutoMSn(533.2684), 13.9 min
85	gi|327264443	PREDICTED: keratin, type II cytoskeletal cochleal-like [Anolis carolinensis]	55	56610	4	0	2	0	4	5.88	3709	1	0	0	665.368	1328.72	2	1328.72	0.0021	0	46.62	0.36	R	NLDLDSIIAEVK	A			Cmpd 652, AutoMSn(665.3677), 25.9 min
85	gi|327264443	PREDICTED: keratin, type II cytoskeletal cochleal-like [Anolis carolinensis]	55	56610	4	0	2	0	4	5.88	3710	1	0	0	665.37	1328.73	2	1328.72	0.0068	0	46.17	0.4	R	NLDLDSIIAEVK	A			Cmpd 656, AutoMSn(665.3700), 26.0 min	emPAI	0.06
86	gi|444731080	Keratin, type II cytoskeletal 78 [Tupaia chinensis]	55	115268	3	0	2	0	3	5.64	3709	1	0	0	665.368	1328.72	2	1328.72	0.0021	0	46.62	0.36	R	NLDLDSIIAEVK	A			Cmpd 652, AutoMSn(665.3677), 25.9 min
86	gi|444731080	Keratin, type II cytoskeletal 78 [Tupaia chinensis]	55	115268	3	0	2	0	3	5.64	3710	1	0	0	665.37	1328.73	2	1328.72	0.0068	0	46.17	0.4	R	NLDLDSIIAEVK	A			Cmpd 656, AutoMSn(665.3700), 26.0 min
86	gi|444731080	Keratin, type II cytoskeletal 78 [Tupaia chinensis]	55	115268	3	0	2	0	3	5.64	5958	5	1	1	737.354	2209.04	3	2209.03	0.009	1	13.67	490	K	YQELQTSAQLHGDSMKETK	V	Oxidation (M)	0.0000000000000020000.0	Cmpd 137, AutoMSn(737.3543), 14.1 min	emPAI	0.03
87	gi|119617041	keratin 5 (epidermolysis bullosa simplex, Dowling-Meara/Kobner/Weber-Cockayne types), isoform CRA_d [Homo sapiens]	55	59397	3	0	2	0	5.1	5.89	3709	1	0	0	665.368	1328.72	2	1328.72	0.0021	0	46.62	0.36	R	NLDLDSIIAEVK	A			Cmpd 652, AutoMSn(665.3677), 25.9 min
87	gi|119617041	keratin 5 (epidermolysis bullosa simplex, Dowling-Meara/Kobner/Weber-Cockayne types), isoform CRA_d [Homo sapiens]	55	59397	3	0	2	0	5.1	5.89	3710	1	0	0	665.37	1328.73	2	1328.72	0.0068	0	46.17	0.4	R	NLDLDSIIAEVK	A			Cmpd 656, AutoMSn(665.3700), 26.0 min
87	gi|119617041	keratin 5 (epidermolysis bullosa simplex, Dowling-Meara/Kobner/Weber-Cockayne types), isoform CRA_d [Homo sapiens]	55	59397	3	0	2	0	5.1	5.89	5022	1	1	1	578.311	1731.91	3	1731.77	0.1414	1	13.13	680	K	SLPSKCSNPAHGDCLF	-	Carbamidomethyl (C)	0.0000000000000100.0	Cmpd 241, AutoMSn(578.3114), 16.2 min	emPAI	0.06
88	gi|557299090	PREDICTED: keratin, type II cytoskeletal cochleal-like isoform X1 [Alligator sinensis]	55	54919	3	0	2	0	6	5.51	3709	1	0	0	665.368	1328.72	2	1328.72	0.0021	0	46.62	0.36	R	NLDLDSIIAEVK	A			Cmpd 652, AutoMSn(665.3677), 25.9 min
88	gi|557299090	PREDICTED: keratin, type II cytoskeletal cochleal-like isoform X1 [Alligator sinensis]	55	54919	3	0	2	0	6	5.51	3710	1	0	0	665.37	1328.73	2	1328.72	0.0068	0	46.17	0.4	R	NLDLDSIIAEVK	A			Cmpd 656, AutoMSn(665.3700), 26.0 min
88	gi|557299090	PREDICTED: keratin, type II cytoskeletal cochleal-like isoform X1 [Alligator sinensis]	55	54919	3	0	2	0	6	5.51	5479	9	1	1	948.71	1895.41	2	1895.95	-0.5462	1	12.74	1300	R	SVTFSSRSAAMPGISQVR	V	Oxidation (M)	0.000000000020000000.0	Cmpd 456, AutoMSn(948.7104), 21.7 min	emPAI	0.06
89	gi|15341208	keratin 8 [Rana catesbeiana]	55	56343	2	0	1	0	2.3	5.49	3709	1	0	1	665.368	1328.72	2	1328.72	0.0021	0	46.62	0.36	R	NLDLDSILAEVK	A			Cmpd 652, AutoMSn(665.3677), 25.9 min
89	gi|15341208	keratin 8 [Rana catesbeiana]	55	56343	2	0	1	0	2.3	5.49	3710	1	0	1	665.37	1328.73	2	1328.72	0.0068	0	46.17	0.4	R	NLDLDSILAEVK	A			Cmpd 656, AutoMSn(665.3700), 26.0 min	emPAI	0.06
90	gi|47604942	keratin 6A [Gallus gallus]	55	56869	2	0	1	0	2.3	8.29	3709	1	0	1	665.368	1328.72	2	1328.72	0.0021	0	46.62	0.36	R	NLDLDSIIADLK	A			Cmpd 652, AutoMSn(665.3677), 25.9 min
90	gi|47604942	keratin 6A [Gallus gallus]	55	56869	2	0	1	0	2.3	8.29	3710	1	0	1	665.37	1328.73	2	1328.72	0.0068	0	46.17	0.4	R	NLDLDSIIADLK	A			Cmpd 656, AutoMSn(665.3700), 26.0 min	emPAI	0.06
91	gi|671017331	PREDICTED: keratin, type I cytoskeletal 9 [Ursus maritimus]	55	67073	9	0	2	0	3	5.36	2587	1	0	0	530.785	1059.56	2	1059.56	0	0	34.34	7	K	TLLDLDNTR	M			Cmpd 331, AutoMSn(530.7853), 18.8 min
91	gi|671017331	PREDICTED: keratin, type I cytoskeletal 9 [Ursus maritimus]	55	67073	9	0	2	0	3	5.36	2588	1	0	0	530.787	1059.56	2	1059.56	0.0038	0	30.76	40	K	TLLDLDNTR	M			Cmpd 368, AutoMSn(530.7872), 19.0 min
91	gi|671017331	PREDICTED: keratin, type I cytoskeletal 9 [Ursus maritimus]	55	67073	9	0	2	0	3	5.36	2589	1	0	0	530.787	1059.56	2	1059.56	0.0042	0	51.42	0.14	K	TLLDLDNTR	M			Cmpd 334, AutoMSn(530.7874), 18.9 min
91	gi|671017331	PREDICTED: keratin, type I cytoskeletal 9 [Ursus maritimus]	55	67073	9	0	2	0	3	5.36	2590	1	0	0	530.788	1059.56	2	1059.56	0.0047	0	58.94	0.06	K	TLLDLDNTR	M			Cmpd 366, AutoMSn(530.7876), 19.0 min
91	gi|671017331	PREDICTED: keratin, type I cytoskeletal 9 [Ursus maritimus]	55	67073	9	0	2	0	3	5.36	2593	1	0	0	530.789	1059.56	2	1059.56	0.0076	0	27.64	33	K	TLLDLDNTR	M			Cmpd 337, AutoMSn(530.7891), 19.0 min
91	gi|671017331	PREDICTED: keratin, type I cytoskeletal 9 [Ursus maritimus]	55	67073	9	0	2	0	3	5.36	2595	1	0	0	530.79	1059.56	2	1059.56	0.0087	0	39.42	2.2	K	TLLDLDNTR	M			Cmpd 222, AutoMSn(530.7896), 18.9 min
91	gi|671017331	PREDICTED: keratin, type I cytoskeletal 9 [Ursus maritimus]	55	67073	9	0	2	0	3	5.36	2596	1	0	0	530.79	1059.57	2	1059.56	0.0103	0	34.06	7.5	K	TLLDLDNTR	M			Cmpd 372, AutoMSn(530.7904), 19.1 min
91	gi|671017331	PREDICTED: keratin, type I cytoskeletal 9 [Ursus maritimus]	55	67073	9	0	2	0	3	5.36	2984	1	0	0	579.301	1156.59	2	1156.58	0.0032	0	50.68	0.14	R	QGVDADINGLR	K			Cmpd 297, AutoMSn(579.3007), 17.4 min
91	gi|671017331	PREDICTED: keratin, type I cytoskeletal 9 [Ursus maritimus]	55	67073	9	0	2	0	3	5.36	2985	2	0	0	579.303	1156.59	2	1156.58	0.0075	0	32.26	9.9	R	QGVDADINGLR	K			Cmpd 300, AutoMSn(579.3028), 17.5 min	emPAI	0.1
92	gi|511906731	PREDICTED: keratin, type I cytoskeletal 9 [Mustela putorius furo]	55	67871	9	0	2	0	3	5.42	2587	1	0	0	530.785	1059.56	2	1059.56	0	0	34.34	7	K	TLLDLDNTR	M			Cmpd 331, AutoMSn(530.7853), 18.8 min
92	gi|511906731	PREDICTED: keratin, type I cytoskeletal 9 [Mustela putorius furo]	55	67871	9	0	2	0	3	5.42	2588	1	0	0	530.787	1059.56	2	1059.56	0.0038	0	30.76	40	K	TLLDLDNTR	M			Cmpd 368, AutoMSn(530.7872), 19.0 min
92	gi|511906731	PREDICTED: keratin, type I cytoskeletal 9 [Mustela putorius furo]	55	67871	9	0	2	0	3	5.42	2589	1	0	0	530.787	1059.56	2	1059.56	0.0042	0	51.42	0.14	K	TLLDLDNTR	M			Cmpd 334, AutoMSn(530.7874), 18.9 min
92	gi|511906731	PREDICTED: keratin, type I cytoskeletal 9 [Mustela putorius furo]	55	67871	9	0	2	0	3	5.42	2590	1	0	0	530.788	1059.56	2	1059.56	0.0047	0	58.94	0.06	K	TLLDLDNTR	M			Cmpd 366, AutoMSn(530.7876), 19.0 min
92	gi|511906731	PREDICTED: keratin, type I cytoskeletal 9 [Mustela putorius furo]	55	67871	9	0	2	0	3	5.42	2593	1	0	0	530.789	1059.56	2	1059.56	0.0076	0	27.64	33	K	TLLDLDNTR	M			Cmpd 337, AutoMSn(530.7891), 19.0 min
92	gi|511906731	PREDICTED: keratin, type I cytoskeletal 9 [Mustela putorius furo]	55	67871	9	0	2	0	3	5.42	2595	1	0	0	530.79	1059.56	2	1059.56	0.0087	0	39.42	2.2	K	TLLDLDNTR	M			Cmpd 222, AutoMSn(530.7896), 18.9 min
92	gi|511906731	PREDICTED: keratin, type I cytoskeletal 9 [Mustela putorius furo]	55	67871	9	0	2	0	3	5.42	2596	1	0	0	530.79	1059.57	2	1059.56	0.0103	0	34.06	7.5	K	TLLDLDNTR	M			Cmpd 372, AutoMSn(530.7904), 19.1 min
92	gi|511906731	PREDICTED: keratin, type I cytoskeletal 9 [Mustela putorius furo]	55	67871	9	0	2	0	3	5.42	2984	1	0	1	579.301	1156.59	2	1156.62	-0.0332	1	50.68	0.14	R	KGVDADINGLR	K			Cmpd 297, AutoMSn(579.3007), 17.4 min
92	gi|511906731	PREDICTED: keratin, type I cytoskeletal 9 [Mustela putorius furo]	55	67871	9	0	2	0	3	5.42	2985	2	0	1	579.303	1156.59	2	1156.62	-0.0289	1	32.26	9.9	R	KGVDADINGLR	K			Cmpd 300, AutoMSn(579.3028), 17.5 min	emPAI	0.1
93	gi|449061850	RecName: Full=Basic phospholipase A2 homolog Gln49-PLA2; Short=svPLA2 homolog [Gloydius ussuriensis]	55	13886	12	0	3	0	20.5	8.34	1734	1	0	0	404.712	807.409	2	807.406	0.0032	0	50.09	0.17	R	AAAICFR	D	Carbamidomethyl (C)	0.0000100.0	Cmpd 207, AutoMSn(404.7119), 15.7 min
93	gi|449061850	RecName: Full=Basic phospholipase A2 homolog Gln49-PLA2; Short=svPLA2 homolog [Gloydius ussuriensis]	55	13886	12	0	3	0	20.5	8.34	1735	1	0	0	404.712	807.41	2	807.406	0.0043	0	54.57	0.06	R	AAAICFR	D	Carbamidomethyl (C)	0.0000100.0	Cmpd 211, AutoMSn(404.7125), 15.8 min
93	gi|449061850	RecName: Full=Basic phospholipase A2 homolog Gln49-PLA2; Short=svPLA2 homolog [Gloydius ussuriensis]	55	13886	12	0	3	0	20.5	8.34	1736	1	0	0	404.714	807.413	2	807.406	0.0069	0	35.14	5.3	R	AAAICFR	D	Carbamidomethyl (C)	0.0000100.0	Cmpd 208, AutoMSn(404.7138), 15.7 min
93	gi|449061850	RecName: Full=Basic phospholipase A2 homolog Gln49-PLA2; Short=svPLA2 homolog [Gloydius ussuriensis]	55	13886	12	0	3	0	20.5	8.34	4433	2	0	1	767.282	1532.55	2	1532.57	-0.017	0	25.99	56	R	CCFVHQCCYEK	V	3 Carbamidomethyl (C)	0.11000001000.0	Cmpd 140, AutoMSn(767.2822), 14.2 min
93	gi|449061850	RecName: Full=Basic phospholipase A2 homolog Gln49-PLA2; Short=svPLA2 homolog [Gloydius ussuriensis]	55	13886	12	0	3	0	20.5	8.34	4434	2	0	1	767.283	1532.55	2	1532.57	-0.0161	0	25.43	64	R	CCFVHQCCYEK	V	3 Carbamidomethyl (C)	0.11000001000.0	Cmpd 143, AutoMSn(767.2827), 14.3 min
93	gi|449061850	RecName: Full=Basic phospholipase A2 homolog Gln49-PLA2; Short=svPLA2 homolog [Gloydius ussuriensis]	55	13886	12	0	3	0	20.5	8.34	4436	2	0	1	511.861	1532.56	3	1532.57	-0.0047	0	28.53	30	R	CCFVHQCCYEK	V	3 Carbamidomethyl (C)	0.11000001000.0	Cmpd 139, AutoMSn(511.8613), 14.2 min
93	gi|449061850	RecName: Full=Basic phospholipase A2 homolog Gln49-PLA2; Short=svPLA2 homolog [Gloydius ussuriensis]	55	13886	12	0	3	0	20.5	8.34	4437	2	0	1	511.861	1532.56	3	1532.57	-0.0044	0	28.63	29	R	CCFVHQCCYEK	V	3 Carbamidomethyl (C)	0.11000001000.0	Cmpd 142, AutoMSn(511.8614), 14.3 min
93	gi|449061850	RecName: Full=Basic phospholipase A2 homolog Gln49-PLA2; Short=svPLA2 homolog [Gloydius ussuriensis]	55	13886	12	0	3	0	20.5	8.34	4438	2	0	1	511.863	1532.57	3	1532.57	-0.0001	0	17.1	410	R	CCFVHQCCYEK	V	3 Carbamidomethyl (C)	0.11000001000.0	Cmpd 137, AutoMSn(511.8629), 14.1 min
93	gi|449061850	RecName: Full=Basic phospholipase A2 homolog Gln49-PLA2; Short=svPLA2 homolog [Gloydius ussuriensis]	55	13886	12	0	3	0	20.5	8.34	5161	1	1	1	878.898	1755.78	2	1755.75	0.0315	1	32.9	7.1	K	EVCECDRAAAICFR	D	3 Carbamidomethyl (C)	0.00101000000100.0	Cmpd 275, AutoMSn(878.8976), 17.2 min
93	gi|449061850	RecName: Full=Basic phospholipase A2 homolog Gln49-PLA2; Short=svPLA2 homolog [Gloydius ussuriensis]	55	13886	12	0	3	0	20.5	8.34	5162	1	1	1	878.899	1755.78	2	1755.75	0.0335	1	19.67	150	K	EVCECDRAAAICFR	D	3 Carbamidomethyl (C)	0.00101000000100.0	Cmpd 278, AutoMSn(878.8986), 17.3 min
93	gi|449061850	RecName: Full=Basic phospholipase A2 homolog Gln49-PLA2; Short=svPLA2 homolog [Gloydius ussuriensis]	55	13886	12	0	3	0	20.5	8.34	5163	1	1	1	586.271	1755.79	3	1755.75	0.0427	1	17.19	260	K	EVCECDRAAAICFR	D	3 Carbamidomethyl (C)	0.00101000000100.0	Cmpd 277, AutoMSn(586.2712), 17.3 min
93	gi|449061850	RecName: Full=Basic phospholipase A2 homolog Gln49-PLA2; Short=svPLA2 homolog [Gloydius ussuriensis]	55	13886	12	0	3	0	20.5	8.34	5164	2	1	1	586.272	1755.79	3	1755.75	0.0437	1	18.27	200	K	EVCECDRAAAICFR	D	3 Carbamidomethyl (C)	0.00101000000100.0	Cmpd 274, AutoMSn(586.2715), 17.2 min	emPAI	0.25
94	gi|384110782	phospholipase A2 type IIE [Dispholidus typus]	55	16333	3	0	1	0	4.7	8.32	1734	1	0	1	404.712	807.409	2	807.406	0.0032	0	50.09	0.17	K	AAALCFR	R	Carbamidomethyl (C)	0.0000100.0	Cmpd 207, AutoMSn(404.7119), 15.7 min
94	gi|384110782	phospholipase A2 type IIE [Dispholidus typus]	55	16333	3	0	1	0	4.7	8.32	1735	1	0	1	404.712	807.41	2	807.406	0.0043	0	54.57	0.06	K	AAALCFR	R	Carbamidomethyl (C)	0.0000100.0	Cmpd 211, AutoMSn(404.7125), 15.8 min
94	gi|384110782	phospholipase A2 type IIE [Dispholidus typus]	55	16333	3	0	1	0	4.7	8.32	1736	1	0	1	404.714	807.413	2	807.406	0.0069	0	35.14	5.3	K	AAALCFR	R	Carbamidomethyl (C)	0.0000100.0	Cmpd 208, AutoMSn(404.7138), 15.7 min	emPAI	0.21
95	gi|82239735	RecName: Full=Snake venom serine protease KN3; Short=SVSP; Flags: Precursor [Trimeresurus stejnegeri]	54	28080	8	0	2	0	7	8.67	1677	1	0	1	791.464	790.457	1	790.459	-0.0021	0	30.86	17	R	VPAIYTK	V			Cmpd 197, AutoMSn(791.4640), 15.2 min
95	gi|82239735	RecName: Full=Snake venom serine protease KN3; Short=SVSP; Flags: Precursor [Trimeresurus stejnegeri]	54	28080	8	0	2	0	7	8.67	1678	1	0	1	791.465	790.458	1	790.459	-0.0013	0	28.24	32	R	VPAIYTK	V			Cmpd 193, AutoMSn(791.4648), 15.1 min
95	gi|82239735	RecName: Full=Snake venom serine protease KN3; Short=SVSP; Flags: Precursor [Trimeresurus stejnegeri]	54	28080	8	0	2	0	7	8.67	1679	1	0	1	396.239	790.463	2	790.459	0.0037	0	40.34	2	R	VPAIYTK	V			Cmpd 189, AutoMSn(396.2386), 15.2 min
95	gi|82239735	RecName: Full=Snake venom serine protease KN3; Short=SVSP; Flags: Precursor [Trimeresurus stejnegeri]	54	28080	8	0	2	0	7	8.67	1680	1	0	1	396.239	790.463	2	790.459	0.0046	0	31.15	16	R	VPAIYTK	V			Cmpd 195, AutoMSn(396.2390), 15.2 min
95	gi|82239735	RecName: Full=Snake venom serine protease KN3; Short=SVSP; Flags: Precursor [Trimeresurus stejnegeri]	54	28080	8	0	2	0	7	8.67	1681	1	0	1	396.239	790.464	2	790.459	0.0052	0	31.85	14	R	VPAIYTK	V			Cmpd 192, AutoMSn(396.2393), 15.1 min
95	gi|82239735	RecName: Full=Snake venom serine protease KN3; Short=SVSP; Flags: Precursor [Trimeresurus stejnegeri]	54	28080	8	0	2	0	7	8.67	1682	1	0	1	396.24	790.465	2	790.459	0.0057	0	24.34	78	R	VPAIYTK	V			Cmpd 186, AutoMSn(396.2396), 15.1 min
95	gi|82239735	RecName: Full=Snake venom serine protease KN3; Short=SVSP; Flags: Precursor [Trimeresurus stejnegeri]	54	28080	8	0	2	0	7	8.67	1683	2	0	1	396.24	790.465	2	790.459	0.0065	0	29.73	23	R	VPAIYTK	V			Cmpd 240, AutoMSn(396.2400), 15.2 min
95	gi|82239735	RecName: Full=Snake venom serine protease KN3; Short=SVSP; Flags: Precursor [Trimeresurus stejnegeri]	54	28080	8	0	2	0	7	8.67	2807	1	0	0	559.803	1117.59	2	1117.58	0.0113	0	54.06	0.069	K	TLCAGILEGGK	D	Carbamidomethyl (C)	0.00100000000.0	Cmpd 319, AutoMSn(559.8030), 18.1 min	emPAI	0.12
96	gi|82239738	RecName: Full=Snake venom serine protease KN10; Short=SVSP; Flags: Precursor [Trimeresurus stejnegeri]	54	28122	8	0	2	0	7	8.67	1677	1	0	0	791.464	790.457	1	790.459	-0.0021	0	30.86	17	R	VPALYTK	V			Cmpd 197, AutoMSn(791.4640), 15.2 min
96	gi|82239738	RecName: Full=Snake venom serine protease KN10; Short=SVSP; Flags: Precursor [Trimeresurus stejnegeri]	54	28122	8	0	2	0	7	8.67	1678	1	0	0	791.465	790.458	1	790.459	-0.0013	0	28.24	32	R	VPALYTK	V			Cmpd 193, AutoMSn(791.4648), 15.1 min
96	gi|82239738	RecName: Full=Snake venom serine protease KN10; Short=SVSP; Flags: Precursor [Trimeresurus stejnegeri]	54	28122	8	0	2	0	7	8.67	1679	1	0	0	396.239	790.463	2	790.459	0.0037	0	40.34	2	R	VPALYTK	V			Cmpd 189, AutoMSn(396.2386), 15.2 min
96	gi|82239738	RecName: Full=Snake venom serine protease KN10; Short=SVSP; Flags: Precursor [Trimeresurus stejnegeri]	54	28122	8	0	2	0	7	8.67	1680	1	0	0	396.239	790.463	2	790.459	0.0046	0	31.15	16	R	VPALYTK	V			Cmpd 195, AutoMSn(396.2390), 15.2 min
96	gi|82239738	RecName: Full=Snake venom serine protease KN10; Short=SVSP; Flags: Precursor [Trimeresurus stejnegeri]	54	28122	8	0	2	0	7	8.67	1681	1	0	0	396.239	790.464	2	790.459	0.0052	0	31.85	14	R	VPALYTK	V			Cmpd 192, AutoMSn(396.2393), 15.1 min
96	gi|82239738	RecName: Full=Snake venom serine protease KN10; Short=SVSP; Flags: Precursor [Trimeresurus stejnegeri]	54	28122	8	0	2	0	7	8.67	1682	1	0	0	396.24	790.465	2	790.459	0.0057	0	24.34	78	R	VPALYTK	V			Cmpd 186, AutoMSn(396.2396), 15.1 min
96	gi|82239738	RecName: Full=Snake venom serine protease KN10; Short=SVSP; Flags: Precursor [Trimeresurus stejnegeri]	54	28122	8	0	2	0	7	8.67	1683	2	0	0	396.24	790.465	2	790.459	0.0065	0	29.73	23	R	VPALYTK	V			Cmpd 240, AutoMSn(396.2400), 15.2 min
96	gi|82239738	RecName: Full=Snake venom serine protease KN10; Short=SVSP; Flags: Precursor [Trimeresurus stejnegeri]	54	28122	8	0	2	0	7	8.67	2807	1	0	0	559.803	1117.59	2	1117.58	0.0113	0	54.06	0.069	K	TLCAGILEGGK	D	Carbamidomethyl (C)	0.00100000000.0	Cmpd 319, AutoMSn(559.8030), 18.1 min	emPAI	0.12
97	gi|82248129	RecName: Full=Snake venom serine protease salmonase; Short=SVSP; Flags: Precursor [Gloydius brevicaudus]	54	28902	2	0	2	0	8.2	6.51	2704	1	1	1	544.791	1087.57	2	1087.57	0.0011	0	30.68	16	R	AAYPELPATR	R			Cmpd 293, AutoMSn(544.7909), 17.4 min
97	gi|82248129	RecName: Full=Snake venom serine protease salmonase; Short=SVSP; Flags: Precursor [Gloydius brevicaudus]	54	28902	2	0	2	0	8.2	6.51	2807	1	0	0	559.803	1117.59	2	1117.58	0.0113	0	54.06	0.069	R	TLCAGILEGGK	D	Carbamidomethyl (C)	0.00100000000.0	Cmpd 319, AutoMSn(559.8030), 18.1 min	emPAI	0.12
98	gi|951152	preprotrimubin [Protobothrops mucrosquamatus]	54	28145	2	0	2	0	8.6	5.86	2807	1	0	0	559.803	1117.59	2	1117.58	0.0113	0	54.06	0.069	R	TLCAGILEGGK	D	Carbamidomethyl (C)	0.00100000000.0	Cmpd 319, AutoMSn(559.8030), 18.1 min
98	gi|951152	preprotrimubin [Protobothrops mucrosquamatus]	54	28145	2	0	2	0	8.6	5.86	3677	5	1	1	663.83	1325.65	2	1325.6	0.049	1	10.49	1300	K	FFCDSSKTYTK	W			Cmpd 105, AutoMSn(663.8299), 13.4 min	emPAI	0.12
99	gi|537142315	keratin, type I cytoskeletal 19 [Cricetulus griseus]	54	98993	8	0	2	0	1.7	5.02	1730	1	0	0	404.21	806.406	2	806.392	0.0136	0	35.76	4.9	R	LAADDFR	T			Cmpd 188, AutoMSn(404.2102), 15.6 min
99	gi|537142315	keratin, type I cytoskeletal 19 [Cricetulus griseus]	54	98993	8	0	2	0	1.7	5.02	2587	1	0	0	530.785	1059.56	2	1059.56	0	0	34.34	7	R	TLLDIDNTR	M			Cmpd 331, AutoMSn(530.7853), 18.8 min
99	gi|537142315	keratin, type I cytoskeletal 19 [Cricetulus griseus]	54	98993	8	0	2	0	1.7	5.02	2588	1	0	0	530.787	1059.56	2	1059.56	0.0038	0	30.76	40	R	TLLDIDNTR	M			Cmpd 368, AutoMSn(530.7872), 19.0 min
99	gi|537142315	keratin, type I cytoskeletal 19 [Cricetulus griseus]	54	98993	8	0	2	0	1.7	5.02	2589	1	0	0	530.787	1059.56	2	1059.56	0.0042	0	51.42	0.14	R	TLLDIDNTR	M			Cmpd 334, AutoMSn(530.7874), 18.9 min
99	gi|537142315	keratin, type I cytoskeletal 19 [Cricetulus griseus]	54	98993	8	0	2	0	1.7	5.02	2590	1	0	0	530.788	1059.56	2	1059.56	0.0047	0	58.94	0.06	R	TLLDIDNTR	M			Cmpd 366, AutoMSn(530.7876), 19.0 min
99	gi|537142315	keratin, type I cytoskeletal 19 [Cricetulus griseus]	54	98993	8	0	2	0	1.7	5.02	2593	1	0	0	530.789	1059.56	2	1059.56	0.0076	0	27.64	33	R	TLLDIDNTR	M			Cmpd 337, AutoMSn(530.7891), 19.0 min
99	gi|537142315	keratin, type I cytoskeletal 19 [Cricetulus griseus]	54	98993	8	0	2	0	1.7	5.02	2595	1	0	0	530.79	1059.56	2	1059.56	0.0087	0	39.42	2.2	R	TLLDIDNTR	M			Cmpd 222, AutoMSn(530.7896), 18.9 min
99	gi|537142315	keratin, type I cytoskeletal 19 [Cricetulus griseus]	54	98993	8	0	2	0	1.7	5.02	2596	1	0	0	530.79	1059.57	2	1059.56	0.0103	0	34.06	7.5	R	TLLDIDNTR	M			Cmpd 372, AutoMSn(530.7904), 19.1 min	emPAI	0.03
100	gi|440901307	Tropomyosin alpha-1 chain [Bos mutus]	51	37470	2	0	1	0	3.1	4.84	3087	1	0	1	590.305	1178.59	2	1178.65	-0.0599	1	21.63	110	K	YEEIKLLSGK	L			Cmpd 273, AutoMSn(590.3046), 17.5 min
100	gi|440901307	Tropomyosin alpha-1 chain [Bos mutus]	51	37470	2	0	1	0	3.1	4.84	3089	1	0	1	590.307	1178.6	2	1178.65	-0.0554	1	51.09	0.13	K	YEEIKLLSGK	L			Cmpd 302, AutoMSn(590.3069), 17.6 min	emPAI	0.09
101	gi|2460033	phospholipase A2 [Gloydius halys]	51	13917	6	0	3	0	18.5	4.82	1734	1	0	0	404.712	807.409	2	807.406	0.0032	0	50.09	0.17	R	AAAICFR	D	Carbamidomethyl (C)	0.0000100.0	Cmpd 207, AutoMSn(404.7119), 15.7 min
101	gi|2460033	phospholipase A2 [Gloydius halys]	51	13917	6	0	3	0	18.5	4.82	1735	1	0	0	404.712	807.41	2	807.406	0.0043	0	54.57	0.06	R	AAAICFR	D	Carbamidomethyl (C)	0.0000100.0	Cmpd 211, AutoMSn(404.7125), 15.8 min
101	gi|2460033	phospholipase A2 [Gloydius halys]	51	13917	6	0	3	0	18.5	4.82	1736	1	0	0	404.714	807.413	2	807.406	0.0069	0	35.14	5.3	R	AAAICFR	D	Carbamidomethyl (C)	0.0000100.0	Cmpd 208, AutoMSn(404.7138), 15.7 min
101	gi|2460033	phospholipase A2 [Gloydius halys]	51	13917	6	0	3	0	18.5	4.82	5190	1	1	1	590.944	1769.81	3	1769.76	0.0464	1	27.94	22	K	EICECDRAAAICFR	D	3 Carbamidomethyl (C)	0.00101000000100.0	Cmpd 283, AutoMSn(590.9443), 17.4 min
101	gi|2460033	phospholipase A2 [Gloydius halys]	51	13917	6	0	3	0	18.5	4.82	5191	1	1	1	590.945	1769.81	3	1769.76	0.0487	1	38.99	1.7	K	EICECDRAAAICFR	D	3 Carbamidomethyl (C)	0.00101000000100.0	Cmpd 280, AutoMSn(590.9451), 17.3 min
101	gi|2460033	phospholipase A2 [Gloydius halys]	51	13917	6	0	3	0	18.5	4.82	5469	1	1	1	629.31	1884.91	3	1884.88	0.0299	1	26.45	29	R	AAAICFRDNLNTYNDK	K	Carbamidomethyl (C)	0.0000100000000000.0	Cmpd 281, AutoMSn(629.3102), 17.4 min	emPAI	0.55
102	gi|678977874	Keratin, type I cytoskeletal 15, partial [Eurypyga helias]	50	48007	2	0	2	0	7.4	4.92	1730	1	0	0	404.21	806.406	2	806.392	0.0136	0	35.76	4.9	R	LAADDFR	L			Cmpd 188, AutoMSn(404.2102), 15.6 min
102	gi|678977874	Keratin, type I cytoskeletal 15, partial [Eurypyga helias]	50	48007	2	0	2	0	7.4	4.92	6223	1	1	1	790.681	2369.02	3	2369.05	-0.0305	0	50.35	0.11	M	ATTFLQSSSSTYGGGFGGGGSNSSR	L			Cmpd 505, AutoMSn(790.6811), 22.2 min	emPAI	0.07
103	gi|82239726	RecName: Full=Snake venom serine protease KN13; Short=SVSP; Flags: Precursor [Trimeresurus stejnegeri]	50	28434	5	1	1	1	2.7	7.08	1946	1	1	1	853.514	852.506	1	852.511	-0.0047	0	17.39	260	R	FLVALYK	S			Cmpd 412, AutoMSn(853.5135), 20.7 min
103	gi|82239726	RecName: Full=Snake venom serine protease KN13; Short=SVSP; Flags: Precursor [Trimeresurus stejnegeri]	50	28434	5	1	1	1	2.7	7.08	1947	1	1	1	853.516	852.509	1	852.511	-0.0023	0	29.37	17	R	FLVALYK	S			Cmpd 409, AutoMSn(853.5159), 20.6 min
103	gi|82239726	RecName: Full=Snake venom serine protease KN13; Short=SVSP; Flags: Precursor [Trimeresurus stejnegeri]	50	28434	5	1	1	1	2.7	7.08	1948	1	1	1	427.264	852.514	2	852.511	0.0033	0	55.32	0.042	R	FLVALYK	S			Cmpd 405, AutoMSn(427.2644), 20.5 min
103	gi|82239726	RecName: Full=Snake venom serine protease KN13; Short=SVSP; Flags: Precursor [Trimeresurus stejnegeri]	50	28434	5	1	1	1	2.7	7.08	1949	1	1	1	427.264	852.514	2	852.511	0.0034	0	44.77	0.48	R	FLVALYK	S			Cmpd 410, AutoMSn(427.2644), 20.6 min
103	gi|82239726	RecName: Full=Snake venom serine protease KN13; Short=SVSP; Flags: Precursor [Trimeresurus stejnegeri]	50	28434	5	1	1	1	2.7	7.08	1950	1	1	1	427.264	852.514	2	852.511	0.0035	0	45.28	0.42	R	FLVALYK	S			Cmpd 407, AutoMSn(427.2645), 20.6 min	emPAI	0.12
104	gi|532026438	PREDICTED: interferon-inducible GTPase 1-like [Microtus ochrogaster]	47	46180	6	0	1	0	2.2	5.56	2587	1	0	1	530.785	1059.56	2	1059.51	0.0477	0	34.34	7	K	VDLDLDNEK	K			Cmpd 331, AutoMSn(530.7853), 18.8 min
104	gi|532026438	PREDICTED: interferon-inducible GTPase 1-like [Microtus ochrogaster]	47	46180	6	0	1	0	2.2	5.56	2589	1	0	1	530.787	1059.56	2	1059.51	0.0518	0	51.42	0.14	K	VDLDLDNEK	K			Cmpd 334, AutoMSn(530.7874), 18.9 min
104	gi|532026438	PREDICTED: interferon-inducible GTPase 1-like [Microtus ochrogaster]	47	46180	6	0	1	0	2.2	5.56	2590	3	0	1	530.788	1059.56	2	1059.51	0.0523	0	42.01	3	K	VDLDLDNEK	K			Cmpd 366, AutoMSn(530.7876), 19.0 min
104	gi|532026438	PREDICTED: interferon-inducible GTPase 1-like [Microtus ochrogaster]	47	46180	6	0	1	0	2.2	5.56	2593	1	0	1	530.789	1059.56	2	1059.51	0.0552	0	27.64	33	K	VDLDLDNEK	K			Cmpd 337, AutoMSn(530.7891), 19.0 min
104	gi|532026438	PREDICTED: interferon-inducible GTPase 1-like [Microtus ochrogaster]	47	46180	6	0	1	0	2.2	5.56	2595	1	0	1	530.79	1059.56	2	1059.51	0.0563	0	39.42	2.2	K	VDLDLDNEK	K			Cmpd 222, AutoMSn(530.7896), 18.9 min
104	gi|532026438	PREDICTED: interferon-inducible GTPase 1-like [Microtus ochrogaster]	47	46180	6	0	1	0	2.2	5.56	2596	1	0	1	530.79	1059.57	2	1059.51	0.0579	0	34.06	7.5	K	VDLDLDNEK	K			Cmpd 372, AutoMSn(530.7904), 19.1 min	emPAI	0.07
105	gi|589944984	PREDICTED: interferon-inducible GTPase 1-like [Peromyscus maniculatus bairdii]	47	48246	6	0	1	0	2.1	6.48	2587	1	0	1	530.785	1059.56	2	1059.51	0.0477	0	34.34	7	K	VDIDLDNEK	K			Cmpd 331, AutoMSn(530.7853), 18.8 min
105	gi|589944984	PREDICTED: interferon-inducible GTPase 1-like [Peromyscus maniculatus bairdii]	47	48246	6	0	1	0	2.1	6.48	2589	1	0	1	530.787	1059.56	2	1059.51	0.0518	0	51.42	0.14	K	VDIDLDNEK	K			Cmpd 334, AutoMSn(530.7874), 18.9 min
105	gi|589944984	PREDICTED: interferon-inducible GTPase 1-like [Peromyscus maniculatus bairdii]	47	48246	6	0	1	0	2.1	6.48	2590	3	0	1	530.788	1059.56	2	1059.51	0.0523	0	42.01	3	K	VDIDLDNEK	K			Cmpd 366, AutoMSn(530.7876), 19.0 min
105	gi|589944984	PREDICTED: interferon-inducible GTPase 1-like [Peromyscus maniculatus bairdii]	47	48246	6	0	1	0	2.1	6.48	2593	1	0	1	530.789	1059.56	2	1059.51	0.0552	0	27.64	33	K	VDIDLDNEK	K			Cmpd 337, AutoMSn(530.7891), 19.0 min
105	gi|589944984	PREDICTED: interferon-inducible GTPase 1-like [Peromyscus maniculatus bairdii]	47	48246	6	0	1	0	2.1	6.48	2595	1	0	1	530.79	1059.56	2	1059.51	0.0563	0	39.42	2.2	K	VDIDLDNEK	K			Cmpd 222, AutoMSn(530.7896), 18.9 min
105	gi|589944984	PREDICTED: interferon-inducible GTPase 1-like [Peromyscus maniculatus bairdii]	47	48246	6	0	1	0	2.1	6.48	2596	1	0	1	530.79	1059.57	2	1059.51	0.0579	0	34.06	7.5	K	VDIDLDNEK	K			Cmpd 372, AutoMSn(530.7904), 19.1 min	emPAI	0.07
106	gi|620976632	PREDICTED: 5~-nucleotidase [Ornithorhynchus anatinus]	47	63332	2	0	1	0	1.4	6.32	1956	1	0	1	430.25	858.486	2	858.481	0.0046	0	53.36	0.098	K	ILNVGSEK	V			Cmpd 105, AutoMSn(430.2501), 13.8 min
106	gi|620976632	PREDICTED: 5~-nucleotidase [Ornithorhynchus anatinus]	47	63332	2	0	1	0	1.4	6.32	1957	1	0	1	430.251	858.487	2	858.481	0.0057	0	36.23	5.1	K	ILNVGSEK	V			Cmpd 103, AutoMSn(430.2506), 13.7 min	emPAI	0.05
107	gi|6252914	HOXB9A [Oryzias latipes]	46	13333	8	0	1	0	6.2	9.48	1771	1	1	1	408.735	815.455	2	815.45	0.0047	0	35.08	6.8	R	ALNLTER	Q			Cmpd 193, AutoMSn(408.7347), 14.5 min
107	gi|6252914	HOXB9A [Oryzias latipes]	46	13333	8	0	1	0	6.2	9.48	1772	1	1	1	408.735	815.455	2	815.45	0.0051	0	28.76	29	R	ALNLTER	Q			Cmpd 158, AutoMSn(408.7349), 14.6 min
107	gi|6252914	HOXB9A [Oryzias latipes]	46	13333	8	0	1	0	6.2	9.48	1773	1	1	1	408.735	815.455	2	815.45	0.0053	0	28.29	32	R	ALNLTER	Q			Cmpd 154, AutoMSn(408.7350), 14.5 min
107	gi|6252914	HOXB9A [Oryzias latipes]	46	13333	8	0	1	0	6.2	9.48	1774	1	1	1	408.735	815.456	2	815.45	0.0055	0	41.53	1.5	R	ALNLTER	Q			Cmpd 208, AutoMSn(408.7351), 14.5 min
107	gi|6252914	HOXB9A [Oryzias latipes]	46	13333	8	0	1	0	6.2	9.48	1775	1	1	1	408.736	815.457	2	815.45	0.0067	0	40.71	1.8	R	ALNLTER	Q			Cmpd 206, AutoMSn(408.7356), 14.4 min
107	gi|6252914	HOXB9A [Oryzias latipes]	46	13333	8	0	1	0	6.2	9.48	1776	1	1	1	408.736	815.458	2	815.45	0.0079	0	35.41	6.3	R	ALNLTER	Q			Cmpd 197, AutoMSn(408.7363), 14.6 min
107	gi|6252914	HOXB9A [Oryzias latipes]	46	13333	8	0	1	0	6.2	9.48	1777	1	1	1	408.736	815.458	2	815.45	0.0084	0	41.38	1.6	R	ALNLTER	Q			Cmpd 153, AutoMSn(408.7365), 14.5 min
107	gi|6252914	HOXB9A [Oryzias latipes]	46	13333	8	0	1	0	6.2	9.48	1779	1	1	1	408.737	815.46	2	815.45	0.0099	0	31.1	17	R	ALNLTER	Q			Cmpd 211, AutoMSn(408.7373), 14.5 min	emPAI	0.26
108	gi|313219060	unnamed protein product [Oikopleura dioica]	46	13368	8	0	1	0	6.2	9.55	1771	1	0	1	408.735	815.455	2	815.439	0.016	0	35.08	6.8	K	ALNLEEK	Q			Cmpd 193, AutoMSn(408.7347), 14.5 min
108	gi|313219060	unnamed protein product [Oikopleura dioica]	46	13368	8	0	1	0	6.2	9.55	1772	1	0	1	408.735	815.455	2	815.439	0.0163	0	28.76	29	K	ALNLEEK	Q			Cmpd 158, AutoMSn(408.7349), 14.6 min
108	gi|313219060	unnamed protein product [Oikopleura dioica]	46	13368	8	0	1	0	6.2	9.55	1773	1	0	1	408.735	815.455	2	815.439	0.0165	0	28.29	32	K	ALNLEEK	Q			Cmpd 154, AutoMSn(408.7350), 14.5 min
108	gi|313219060	unnamed protein product [Oikopleura dioica]	46	13368	8	0	1	0	6.2	9.55	1774	1	0	1	408.735	815.456	2	815.439	0.0167	0	41.53	1.5	K	ALNLEEK	Q			Cmpd 208, AutoMSn(408.7351), 14.5 min
108	gi|313219060	unnamed protein product [Oikopleura dioica]	46	13368	8	0	1	0	6.2	9.55	1775	1	0	1	408.736	815.457	2	815.439	0.0179	0	40.71	1.8	K	ALNLEEK	Q			Cmpd 206, AutoMSn(408.7356), 14.4 min
108	gi|313219060	unnamed protein product [Oikopleura dioica]	46	13368	8	0	1	0	6.2	9.55	1776	1	0	1	408.736	815.458	2	815.439	0.0191	0	35.41	6.3	K	ALNLEEK	Q			Cmpd 197, AutoMSn(408.7363), 14.6 min
108	gi|313219060	unnamed protein product [Oikopleura dioica]	46	13368	8	0	1	0	6.2	9.55	1777	1	0	1	408.736	815.458	2	815.439	0.0197	0	41.38	1.6	K	ALNLEEK	Q			Cmpd 153, AutoMSn(408.7365), 14.5 min
108	gi|313219060	unnamed protein product [Oikopleura dioica]	46	13368	8	0	1	0	6.2	9.55	1779	1	0	1	408.737	815.46	2	815.439	0.0211	0	31.1	17	K	ALNLEEK	Q			Cmpd 211, AutoMSn(408.7373), 14.5 min	emPAI	0.26
109	gi|344258094	hypothetical protein I79_023565 [Cricetulus griseus]	46	47609	8	0	1	0	1.7	9.65	1771	1	0	1	408.735	815.455	2	815.45	0.0047	0	35.08	6.8	K	ALNLETR	K			Cmpd 193, AutoMSn(408.7347), 14.5 min
109	gi|344258094	hypothetical protein I79_023565 [Cricetulus griseus]	46	47609	8	0	1	0	1.7	9.65	1772	1	0	1	408.735	815.455	2	815.45	0.0051	0	28.76	29	K	ALNLETR	K			Cmpd 158, AutoMSn(408.7349), 14.6 min
109	gi|344258094	hypothetical protein I79_023565 [Cricetulus griseus]	46	47609	8	0	1	0	1.7	9.65	1773	1	0	1	408.735	815.455	2	815.45	0.0053	0	28.29	32	K	ALNLETR	K			Cmpd 154, AutoMSn(408.7350), 14.5 min
109	gi|344258094	hypothetical protein I79_023565 [Cricetulus griseus]	46	47609	8	0	1	0	1.7	9.65	1774	1	0	1	408.735	815.456	2	815.45	0.0055	0	41.53	1.5	K	ALNLETR	K			Cmpd 208, AutoMSn(408.7351), 14.5 min
109	gi|344258094	hypothetical protein I79_023565 [Cricetulus griseus]	46	47609	8	0	1	0	1.7	9.65	1775	1	0	1	408.736	815.457	2	815.45	0.0067	0	40.71	1.8	K	ALNLETR	K			Cmpd 206, AutoMSn(408.7356), 14.4 min
109	gi|344258094	hypothetical protein I79_023565 [Cricetulus griseus]	46	47609	8	0	1	0	1.7	9.65	1776	1	0	1	408.736	815.458	2	815.45	0.0079	0	35.41	6.3	K	ALNLETR	K			Cmpd 197, AutoMSn(408.7363), 14.6 min
109	gi|344258094	hypothetical protein I79_023565 [Cricetulus griseus]	46	47609	8	0	1	0	1.7	9.65	1777	1	0	1	408.736	815.458	2	815.45	0.0084	0	41.38	1.6	K	ALNLETR	K			Cmpd 153, AutoMSn(408.7365), 14.5 min
109	gi|344258094	hypothetical protein I79_023565 [Cricetulus griseus]	46	47609	8	0	1	0	1.7	9.65	1779	1	0	1	408.737	815.46	2	815.45	0.0099	0	31.1	17	K	ALNLETR	K			Cmpd 211, AutoMSn(408.7373), 14.5 min	emPAI	0.07
110	gi|512864600	PREDICTED: Fc receptor-like protein 2-like [Xenopus (Silurana) tropicalis]	46	37843	8	0	1	0	2	6.4	1771	1	0	1	408.735	815.455	2	815.439	0.016	0	35.08	6.8	K	ALNIEEK	L			Cmpd 193, AutoMSn(408.7347), 14.5 min
110	gi|512864600	PREDICTED: Fc receptor-like protein 2-like [Xenopus (Silurana) tropicalis]	46	37843	8	0	1	0	2	6.4	1772	1	0	1	408.735	815.455	2	815.439	0.0163	0	28.76	29	K	ALNIEEK	L			Cmpd 158, AutoMSn(408.7349), 14.6 min
110	gi|512864600	PREDICTED: Fc receptor-like protein 2-like [Xenopus (Silurana) tropicalis]	46	37843	8	0	1	0	2	6.4	1773	1	0	1	408.735	815.455	2	815.439	0.0165	0	28.29	32	K	ALNIEEK	L			Cmpd 154, AutoMSn(408.7350), 14.5 min
110	gi|512864600	PREDICTED: Fc receptor-like protein 2-like [Xenopus (Silurana) tropicalis]	46	37843	8	0	1	0	2	6.4	1774	1	0	1	408.735	815.456	2	815.439	0.0167	0	41.53	1.5	K	ALNIEEK	L			Cmpd 208, AutoMSn(408.7351), 14.5 min
110	gi|512864600	PREDICTED: Fc receptor-like protein 2-like [Xenopus (Silurana) tropicalis]	46	37843	8	0	1	0	2	6.4	1775	1	0	1	408.736	815.457	2	815.439	0.0179	0	40.71	1.8	K	ALNIEEK	L			Cmpd 206, AutoMSn(408.7356), 14.4 min
110	gi|512864600	PREDICTED: Fc receptor-like protein 2-like [Xenopus (Silurana) tropicalis]	46	37843	8	0	1	0	2	6.4	1776	1	0	1	408.736	815.458	2	815.439	0.0191	0	35.41	6.3	K	ALNIEEK	L			Cmpd 197, AutoMSn(408.7363), 14.6 min
110	gi|512864600	PREDICTED: Fc receptor-like protein 2-like [Xenopus (Silurana) tropicalis]	46	37843	8	0	1	0	2	6.4	1777	1	0	1	408.736	815.458	2	815.439	0.0197	0	41.38	1.6	K	ALNIEEK	L			Cmpd 153, AutoMSn(408.7365), 14.5 min
110	gi|512864600	PREDICTED: Fc receptor-like protein 2-like [Xenopus (Silurana) tropicalis]	46	37843	8	0	1	0	2	6.4	1779	1	0	1	408.737	815.46	2	815.439	0.0211	0	31.1	17	K	ALNIEEK	L			Cmpd 211, AutoMSn(408.7373), 14.5 min	emPAI	0.09
111	gi|586542211	PREDICTED: IQ domain-containing protein G [Pteropus alecto]	46	62315	8	0	1	0	1.3	9.13	1771	1	0	1	408.735	815.455	2	815.439	0.016	0	35.08	6.8	K	AINLEEK	S			Cmpd 193, AutoMSn(408.7347), 14.5 min
111	gi|586542211	PREDICTED: IQ domain-containing protein G [Pteropus alecto]	46	62315	8	0	1	0	1.3	9.13	1772	1	0	1	408.735	815.455	2	815.439	0.0163	0	28.76	29	K	AINLEEK	S			Cmpd 158, AutoMSn(408.7349), 14.6 min
111	gi|586542211	PREDICTED: IQ domain-containing protein G [Pteropus alecto]	46	62315	8	0	1	0	1.3	9.13	1773	1	0	1	408.735	815.455	2	815.439	0.0165	0	28.29	32	K	AINLEEK	S			Cmpd 154, AutoMSn(408.7350), 14.5 min
111	gi|586542211	PREDICTED: IQ domain-containing protein G [Pteropus alecto]	46	62315	8	0	1	0	1.3	9.13	1774	1	0	1	408.735	815.456	2	815.439	0.0167	0	41.53	1.5	K	AINLEEK	S			Cmpd 208, AutoMSn(408.7351), 14.5 min
111	gi|586542211	PREDICTED: IQ domain-containing protein G [Pteropus alecto]	46	62315	8	0	1	0	1.3	9.13	1775	1	0	1	408.736	815.457	2	815.439	0.0179	0	40.71	1.8	K	AINLEEK	S			Cmpd 206, AutoMSn(408.7356), 14.4 min
111	gi|586542211	PREDICTED: IQ domain-containing protein G [Pteropus alecto]	46	62315	8	0	1	0	1.3	9.13	1776	1	0	1	408.736	815.458	2	815.439	0.0191	0	35.41	6.3	K	AINLEEK	S			Cmpd 197, AutoMSn(408.7363), 14.6 min
111	gi|586542211	PREDICTED: IQ domain-containing protein G [Pteropus alecto]	46	62315	8	0	1	0	1.3	9.13	1777	1	0	1	408.736	815.458	2	815.439	0.0197	0	41.38	1.6	K	AINLEEK	S			Cmpd 153, AutoMSn(408.7365), 14.5 min
111	gi|586542211	PREDICTED: IQ domain-containing protein G [Pteropus alecto]	46	62315	8	0	1	0	1.3	9.13	1779	1	0	1	408.737	815.46	2	815.439	0.0211	0	31.1	17	K	AINLEEK	S			Cmpd 211, AutoMSn(408.7373), 14.5 min	emPAI	0.05
112	gi|395532556	PREDICTED: uncharacterized protein LOC100921792 [Sarcophilus harrisii]	45	108486	9	0	3	0	2.9	4.79	1730	1	0	0	404.21	806.406	2	806.392	0.0136	0	35.76	4.9	R	LAADDFR	M			Cmpd 188, AutoMSn(404.2102), 15.6 min
112	gi|395532556	PREDICTED: uncharacterized protein LOC100921792 [Sarcophilus harrisii]	45	108486	9	0	3	0	2.9	4.79	2787	1	0	0	1109.48	1108.48	1	1108.48	-0.006	0	18.34	240	K	DAEAWFNEK	S			Cmpd 393, AutoMSn(1109.4838), 19.6 min
112	gi|395532556	PREDICTED: uncharacterized protein LOC100921792 [Sarcophilus harrisii]	45	108486	9	0	3	0	2.9	4.79	2788	1	0	0	1109.48	1108.48	1	1108.48	-0.0053	0	17.63	280	K	DAEAWFNEK	S			Cmpd 396, AutoMSn(1109.4845), 19.7 min
112	gi|395532556	PREDICTED: uncharacterized protein LOC100921792 [Sarcophilus harrisii]	45	108486	9	0	3	0	2.9	4.79	2789	1	0	0	555.252	1108.49	2	1108.48	0.0065	0	37.93	2.6	K	DAEAWFNEK	S			Cmpd 391, AutoMSn(555.2518), 19.6 min
112	gi|395532556	PREDICTED: uncharacterized protein LOC100921792 [Sarcophilus harrisii]	45	108486	9	0	3	0	2.9	4.79	2790	1	0	0	555.252	1108.49	2	1108.48	0.007	0	38.12	2.5	K	DAEAWFNEK	S			Cmpd 394, AutoMSn(555.2520), 19.6 min
112	gi|395532556	PREDICTED: uncharacterized protein LOC100921792 [Sarcophilus harrisii]	45	108486	9	0	3	0	2.9	4.79	2791	1	0	0	555.253	1108.49	2	1108.48	0.0079	0	44.99	0.51	K	DAEAWFNEK	S			Cmpd 389, AutoMSn(555.2525), 19.5 min
112	gi|395532556	PREDICTED: uncharacterized protein LOC100921792 [Sarcophilus harrisii]	45	108486	9	0	3	0	2.9	4.79	2792	1	0	0	555.254	1108.49	2	1108.48	0.0106	0	44.9	0.52	K	DAEAWFNEK	S			Cmpd 363, AutoMSn(555.2538), 19.6 min
112	gi|395532556	PREDICTED: uncharacterized protein LOC100921792 [Sarcophilus harrisii]	45	108486	9	0	3	0	2.9	4.79	2794	1	0	0	555.254	1108.49	2	1108.48	0.0108	0	33.65	6.9	K	DAEAWFNEK	S			Cmpd 361, AutoMSn(555.2539), 19.5 min
112	gi|395532556	PREDICTED: uncharacterized protein LOC100921792 [Sarcophilus harrisii]	45	108486	9	0	3	0	2.9	4.79	3396	4	0	1	631.806	1261.6	2	1261.59	0.007	0	15.87	430	R	SLLEEGGSSGGGGR	G			Cmpd 143, AutoMSn(631.8057), 14.6 min	emPAI	0.03
113	gi|57619201	keratin, type I cytoskeletal 25 [Ovis aries]	45	49282	8	0	2	0	4.4	5.04	2787	1	0	0	1109.48	1108.48	1	1108.48	-0.006	0	18.34	240	R	DAEAWFNEK	S			Cmpd 393, AutoMSn(1109.4838), 19.6 min
113	gi|57619201	keratin, type I cytoskeletal 25 [Ovis aries]	45	49282	8	0	2	0	4.4	5.04	2788	1	0	0	1109.48	1108.48	1	1108.48	-0.0053	0	17.63	280	R	DAEAWFNEK	S			Cmpd 396, AutoMSn(1109.4845), 19.7 min
113	gi|57619201	keratin, type I cytoskeletal 25 [Ovis aries]	45	49282	8	0	2	0	4.4	5.04	2789	1	0	0	555.252	1108.49	2	1108.48	0.0065	0	37.93	2.6	R	DAEAWFNEK	S			Cmpd 391, AutoMSn(555.2518), 19.6 min
113	gi|57619201	keratin, type I cytoskeletal 25 [Ovis aries]	45	49282	8	0	2	0	4.4	5.04	2790	1	0	0	555.252	1108.49	2	1108.48	0.007	0	38.12	2.5	R	DAEAWFNEK	S			Cmpd 394, AutoMSn(555.2520), 19.6 min
113	gi|57619201	keratin, type I cytoskeletal 25 [Ovis aries]	45	49282	8	0	2	0	4.4	5.04	2791	1	0	0	555.253	1108.49	2	1108.48	0.0079	0	44.99	0.51	R	DAEAWFNEK	S			Cmpd 389, AutoMSn(555.2525), 19.5 min
113	gi|57619201	keratin, type I cytoskeletal 25 [Ovis aries]	45	49282	8	0	2	0	4.4	5.04	2792	1	0	0	555.254	1108.49	2	1108.48	0.0106	0	44.9	0.52	R	DAEAWFNEK	S			Cmpd 363, AutoMSn(555.2538), 19.6 min
113	gi|57619201	keratin, type I cytoskeletal 25 [Ovis aries]	45	49282	8	0	2	0	4.4	5.04	2794	1	0	0	555.254	1108.49	2	1108.48	0.0108	0	33.65	6.9	R	DAEAWFNEK	S			Cmpd 361, AutoMSn(555.2539), 19.5 min
113	gi|57619201	keratin, type I cytoskeletal 25 [Ovis aries]	45	49282	8	0	2	0	4.4	5.04	2799	5	1	1	557.027	1112.04	2	1111.61	0.4304	0	9.02	3900	R	AGPRPTTGSLR	L			Cmpd 140, AutoMSn(557.0274), 14.1 min	emPAI	0.07
114	gi|538259853	phosphodiesterase [Protobothrops flavoviridis]	45	96526	14	0	7	0	11.5	8.03	2207	1	1	0	457.757	913.5	2	913.498	0.0022	0	28	26	R	LNLNNQAK	T			Cmpd 33, AutoMSn(457.7574), 12.8 min
114	gi|538259853	phosphodiesterase [Protobothrops flavoviridis]	45	96526	14	0	7	0	11.5	8.03	2208	1	1	0	457.759	913.504	2	913.498	0.0055	0	34.9	5.4	R	LNLNNQAK	T			Cmpd 35, AutoMSn(457.7591), 12.8 min
114	gi|538259853	phosphodiesterase [Protobothrops flavoviridis]	45	96526	14	0	7	0	11.5	8.03	2420	1	1	1	516.77	1031.53	2	1031.52	0.0028	0	33.9	7.9	K	YCLLHQAK	Y	Carbamidomethyl (C)	0.01000000.0	Cmpd 66, AutoMSn(516.7698), 13.6 min
114	gi|538259853	phosphodiesterase [Protobothrops flavoviridis]	45	96526	14	0	7	0	11.5	8.03	3854	1	1	1	678.338	1354.66	2	1354.66	0.0064	0	30.47	13	K	AATYFWPGSEVK	I			Cmpd 331, AutoMSn(678.3384), 20.8 min
114	gi|538259853	phosphodiesterase [Protobothrops flavoviridis]	45	96526	14	0	7	0	11.5	8.03	3855	2	1	1	678.338	1354.66	2	1354.66	0.0066	0	12.04	940	K	AATYFWPGSEVK	I			Cmpd 417, AutoMSn(678.3384), 20.8 min
114	gi|538259853	phosphodiesterase [Protobothrops flavoviridis]	45	96526	14	0	7	0	11.5	8.03	3856	1	1	1	678.34	1354.67	2	1354.66	0.0101	0	23.27	71	K	AATYFWPGSEVK	I			Cmpd 333, AutoMSn(678.3402), 20.8 min
114	gi|538259853	phosphodiesterase [Protobothrops flavoviridis]	45	96526	14	0	7	0	11.5	8.03	3857	1	1	1	678.342	1354.67	2	1354.66	0.0132	0	45.17	0.46	K	AATYFWPGSEVK	I			Cmpd 329, AutoMSn(678.3417), 20.7 min
114	gi|538259853	phosphodiesterase [Protobothrops flavoviridis]	45	96526	14	0	7	0	11.5	8.03	4430	2	1	1	511.619	1531.83	3	1531.82	0.0156	0	20.82	120	R	LWNYFHTTLIPK	Y			Cmpd 467, AutoMSn(511.6187), 21.5 min
114	gi|538259853	phosphodiesterase [Protobothrops flavoviridis]	45	96526	14	0	7	0	11.5	8.03	4431	2	1	1	511.619	1531.84	3	1531.82	0.0166	0	20.68	130	R	LWNYFHTTLIPK	Y			Cmpd 351, AutoMSn(511.6190), 21.4 min
114	gi|538259853	phosphodiesterase [Protobothrops flavoviridis]	45	96526	14	0	7	0	11.5	8.03	5414	10	1	1	926.449	1850.88	2	1850.89	-0.0033	0	15.96	330	R	AGYLETWDSLMPNINK	L			Cmpd 471, AutoMSn(926.4493), 25.6 min
114	gi|538259853	phosphodiesterase [Protobothrops flavoviridis]	45	96526	14	0	7	0	11.5	8.03	6141	2	1	1	771.05	2310.13	3	2310.13	-0.0053	0	24.54	41	K	NPAWWGGQPIWHTATYQGLK	A			Cmpd 379, AutoMSn(771.0500), 22.2 min
114	gi|538259853	phosphodiesterase [Protobothrops flavoviridis]	45	96526	14	0	7	0	11.5	8.03	6143	3	1	1	771.057	2310.15	3	2310.13	0.017	0	19.35	140	K	NPAWWGGQPIWHTATYQGLK	A			Cmpd 380, AutoMSn(771.0574), 22.3 min
114	gi|538259853	phosphodiesterase [Protobothrops flavoviridis]	45	96526	14	0	7	0	11.5	8.03	6145	3	1	1	771.062	2310.16	3	2310.13	0.0295	0	17.04	230	K	NPAWWGGQPIWHTATYQGLK	A			Cmpd 381, AutoMSn(771.0616), 22.3 min
114	gi|538259853	phosphodiesterase [Protobothrops flavoviridis]	45	96526	14	0	7	0	11.5	8.03	6452	8	1	1	894.698	2681.07	3	2681.05	0.0208	0	17.21	280	R	QACCSDYEDTCVLPTQSWSCSK	L	4 Carbamidomethyl (C)	0.0011000000100000000100.0	Cmpd 320, AutoMSn(894.6976), 20.5 min	emPAI	0.03
115	gi|602648327	PREDICTED: ectonucleotide pyrophosphatase/phosphodiesterase family member 3-like, partial [Python bivittatus]	45	93747	6	0	2	0	2.4	6.15	2207	1	0	0	457.757	913.5	2	913.498	0.0022	0	28	26	K	LNLNNQAK	M			Cmpd 33, AutoMSn(457.7574), 12.8 min
115	gi|602648327	PREDICTED: ectonucleotide pyrophosphatase/phosphodiesterase family member 3-like, partial [Python bivittatus]	45	93747	6	0	2	0	2.4	6.15	2208	1	0	0	457.759	913.504	2	913.498	0.0055	0	34.9	5.4	K	LNLNNQAK	M			Cmpd 35, AutoMSn(457.7591), 12.8 min
115	gi|602648327	PREDICTED: ectonucleotide pyrophosphatase/phosphodiesterase family member 3-like, partial [Python bivittatus]	45	93747	6	0	2	0	2.4	6.15	3854	1	0	1	678.338	1354.66	2	1354.66	0.0064	0	30.47	13	K	AATYFWPGSDIK	I			Cmpd 331, AutoMSn(678.3384), 20.8 min
115	gi|602648327	PREDICTED: ectonucleotide pyrophosphatase/phosphodiesterase family member 3-like, partial [Python bivittatus]	45	93747	6	0	2	0	2.4	6.15	3855	2	0	1	678.338	1354.66	2	1354.66	0.0066	0	12.04	940	K	AATYFWPGSDIK	I			Cmpd 417, AutoMSn(678.3384), 20.8 min
115	gi|602648327	PREDICTED: ectonucleotide pyrophosphatase/phosphodiesterase family member 3-like, partial [Python bivittatus]	45	93747	6	0	2	0	2.4	6.15	3856	1	0	1	678.34	1354.67	2	1354.66	0.0101	0	23.27	71	K	AATYFWPGSDIK	I			Cmpd 333, AutoMSn(678.3402), 20.8 min
115	gi|602648327	PREDICTED: ectonucleotide pyrophosphatase/phosphodiesterase family member 3-like, partial [Python bivittatus]	45	93747	6	0	2	0	2.4	6.15	3857	1	0	1	678.342	1354.67	2	1354.66	0.0132	0	45.17	0.46	K	AATYFWPGSDIK	I			Cmpd 329, AutoMSn(678.3417), 20.7 min	emPAI	0.03
116	gi|296487594	TPA: growth arrest-specific 2-like [Bos taurus]	44	75074	6	0	1	0	1.6	9.62	2753	1	1	1	551.798	1101.58	2	1101.6	-0.0205	1	26.48	40	K	GISSPSTPKTK	R			Cmpd 87, AutoMSn(551.7985), 15.0 min
116	gi|296487594	TPA: growth arrest-specific 2-like [Bos taurus]	44	75074	6	0	1	0	1.6	9.62	2754	1	1	1	551.799	1101.58	2	1101.6	-0.0204	1	29.18	21	K	GISSPSTPKTK	R			Cmpd 238, AutoMSn(551.7986), 15.1 min
116	gi|296487594	TPA: growth arrest-specific 2-like [Bos taurus]	44	75074	6	0	1	0	1.6	9.62	2756	4	1	1	551.8	1101.58	2	1101.6	-0.0181	1	25.54	49	K	GISSPSTPKTK	R			Cmpd 162, AutoMSn(551.7997), 15.0 min
116	gi|296487594	TPA: growth arrest-specific 2-like [Bos taurus]	44	75074	6	0	1	0	1.6	9.62	2757	4	1	1	551.8	1101.59	2	1101.6	-0.0179	1	20.79	150	K	GISSPSTPKTK	R			Cmpd 90, AutoMSn(551.7998), 15.0 min
116	gi|296487594	TPA: growth arrest-specific 2-like [Bos taurus]	44	75074	6	0	1	0	1.6	9.62	2758	1	1	1	551.8	1101.59	2	1101.6	-0.0173	1	44.44	0.63	K	GISSPSTPKTK	R			Cmpd 92, AutoMSn(551.8001), 15.1 min
116	gi|296487594	TPA: growth arrest-specific 2-like [Bos taurus]	44	75074	6	0	1	0	1.6	9.62	2760	1	1	1	551.801	1101.59	2	1101.6	-0.0151	1	27.16	34	K	GISSPSTPKTK	R			Cmpd 26, AutoMSn(551.8012), 15.1 min	emPAI	0.04
117	gi|13959655	RecName: Full=Venom serine proteinase-like protein 2; Short=VLP2; Flags: Precursor [Macrovipera lebetina]	44	28875	4	0	1	0	4.2	9.07	3229	1	1	1	604.805	1207.6	2	1207.63	-0.032	0	40.95	1.3	R	IMGWGTITTTK	V			Cmpd 423, AutoMSn(604.8048), 20.3 min
117	gi|13959655	RecName: Full=Venom serine proteinase-like protein 2; Short=VLP2; Flags: Precursor [Macrovipera lebetina]	44	28875	4	0	1	0	4.2	9.07	3230	1	1	1	604.805	1207.6	2	1207.63	-0.031	0	42.77	0.86	R	IMGWGTITTTK	V			Cmpd 426, AutoMSn(604.8053), 20.4 min
117	gi|13959655	RecName: Full=Venom serine proteinase-like protein 2; Short=VLP2; Flags: Precursor [Macrovipera lebetina]	44	28875	4	0	1	0	4.2	9.07	3287	1	1	1	612.802	1223.59	2	1223.62	-0.0327	0	33.11	7.6	R	IMGWGTITTTK	V	Oxidation (M)	0.02000000000.0	Cmpd 334, AutoMSn(612.8019), 18.3 min
117	gi|13959655	RecName: Full=Venom serine proteinase-like protein 2; Short=VLP2; Flags: Precursor [Macrovipera lebetina]	44	28875	4	0	1	0	4.2	9.07	3288	6	1	1	612.804	1223.59	2	1223.62	-0.0282	0	10.53	1400	R	IMGWGTITTTK	V	Oxidation (M)	0.02000000000.0	Cmpd 338, AutoMSn(612.8042), 18.4 min	emPAI	0.24
118	gi|432868566	PREDICTED: rho GTPase-activating protein 23-like [Oryzias latipes]	44	198119	7	0	1	0	0.8	8.98	4633	7	1	1	805.901	1609.79	2	1609.73	0.0622	1	20.24	130	R	ESSKMDNEELGISR	Q	Oxidation (M)	0.00002000000000.0	Cmpd 258, AutoMSn(805.9010), 16.8 min
118	gi|432868566	PREDICTED: rho GTPase-activating protein 23-like [Oryzias latipes]	44	198119	7	0	1	0	0.8	8.98	4634	1	1	1	805.902	1609.79	2	1609.73	0.0648	1	45.27	0.41	R	ESSKMDNEELGISR	Q	Oxidation (M)	0.00002000000000.0	Cmpd 293, AutoMSn(805.9023), 16.8 min
118	gi|432868566	PREDICTED: rho GTPase-activating protein 23-like [Oryzias latipes]	44	198119	7	0	1	0	0.8	8.98	4636	1	1	1	537.605	1609.79	3	1609.73	0.0674	1	40.1	1.3	R	ESSKMDNEELGISR	Q	Oxidation (M)	0.00002000000000.0	Cmpd 289, AutoMSn(537.6048), 16.7 min
118	gi|432868566	PREDICTED: rho GTPase-activating protein 23-like [Oryzias latipes]	44	198119	7	0	1	0	0.8	8.98	4637	1	1	1	537.605	1609.79	3	1609.73	0.0676	1	35.24	4.1	R	ESSKMDNEELGISR	Q	Oxidation (M)	0.00002000000000.0	Cmpd 255, AutoMSn(537.6049), 16.8 min
118	gi|432868566	PREDICTED: rho GTPase-activating protein 23-like [Oryzias latipes]	44	198119	7	0	1	0	0.8	8.98	4638	3	1	1	537.606	1609.79	3	1609.73	0.0693	1	22.48	77	R	ESSKMDNEELGISR	Q	Oxidation (M)	0.00002000000000.0	Cmpd 292, AutoMSn(537.6055), 16.8 min
118	gi|432868566	PREDICTED: rho GTPase-activating protein 23-like [Oryzias latipes]	44	198119	7	0	1	0	0.8	8.98	4639	2	1	1	537.606	1609.79	3	1609.73	0.0695	1	24.83	45	R	ESSKMDNEELGISR	Q	Oxidation (M)	0.00002000000000.0	Cmpd 295, AutoMSn(537.6056), 16.8 min
118	gi|432868566	PREDICTED: rho GTPase-activating protein 23-like [Oryzias latipes]	44	198119	7	0	1	0	0.8	8.98	4640	1	1	1	537.606	1609.8	3	1609.73	0.0705	1	36.75	2.9	R	ESSKMDNEELGISR	Q	Oxidation (M)	0.00002000000000.0	Cmpd 256, AutoMSn(537.6059), 16.8 min	emPAI	0.03
119	gi|348516246	PREDICTED: serine protease inhibitor A3K-like [Oreochromis niloticus]	42	45306	10	0	1	0	3	5.87	4264	1	1	1	737.592	1473.17	2	1473.82	-0.6539	0	33.12	14	R	FKPQPEFLEVLK	Q			Cmpd 605, AutoMSn(737.5919), 25.4 min
119	gi|348516246	PREDICTED: serine protease inhibitor A3K-like [Oreochromis niloticus]	42	45306	10	0	1	0	3	5.87	4265	1	1	1	737.592	1473.17	2	1473.82	-0.6527	0	31.58	20	R	FKPQPEFLEVLK	Q			Cmpd 667, AutoMSn(737.5925), 25.4 min
119	gi|348516246	PREDICTED: serine protease inhibitor A3K-like [Oreochromis niloticus]	42	45306	10	0	1	0	3	5.87	4266	1	1	1	737.596	1473.18	2	1473.82	-0.6458	0	29.5	33	R	FKPQPEFLEVLK	Q			Cmpd 631, AutoMSn(737.5960), 25.4 min
119	gi|348516246	PREDICTED: serine protease inhibitor A3K-like [Oreochromis niloticus]	42	45306	10	0	1	0	3	5.87	4267	1	1	1	737.597	1473.18	2	1473.82	-0.6442	0	29.16	35	R	FKPQPEFLEVLK	Q			Cmpd 634, AutoMSn(737.5967), 25.5 min
119	gi|348516246	PREDICTED: serine protease inhibitor A3K-like [Oreochromis niloticus]	42	45306	10	0	1	0	3	5.87	4268	1	1	1	737.597	1473.18	2	1473.82	-0.6441	0	28.33	43	R	FKPQPEFLEVLK	Q			Cmpd 638, AutoMSn(737.5968), 25.5 min
119	gi|348516246	PREDICTED: serine protease inhibitor A3K-like [Oreochromis niloticus]	42	45306	10	0	1	0	3	5.87	4269	1	1	1	737.598	1473.18	2	1473.82	-0.6417	0	26.99	58	R	FKPQPEFLEVLK	Q			Cmpd 628, AutoMSn(737.5980), 25.3 min
119	gi|348516246	PREDICTED: serine protease inhibitor A3K-like [Oreochromis niloticus]	42	45306	10	0	1	0	3	5.87	4270	1	1	1	737.598	1473.18	2	1473.82	-0.6409	0	32.3	17	R	FKPQPEFLEVLK	Q			Cmpd 570, AutoMSn(737.5984), 25.3 min
119	gi|348516246	PREDICTED: serine protease inhibitor A3K-like [Oreochromis niloticus]	42	45306	10	0	1	0	3	5.87	4271	4	1	1	737.602	1473.19	2	1473.82	-0.6335	0	34.26	11	R	FKPQPEFLEVLK	Q			Cmpd 608, AutoMSn(737.6021), 25.4 min
119	gi|348516246	PREDICTED: serine protease inhibitor A3K-like [Oreochromis niloticus]	42	45306	10	0	1	0	3	5.87	4272	1	1	1	737.849	1473.68	2	1473.82	-0.1405	0	28.65	20	R	FKPQPEFLEVLK	Q			Cmpd 611, AutoMSn(737.8486), 25.5 min
119	gi|348516246	PREDICTED: serine protease inhibitor A3K-like [Oreochromis niloticus]	42	45306	10	0	1	0	3	5.87	4273	1	1	1	737.849	1473.68	2	1473.82	-0.139	0	42.04	0.92	R	FKPQPEFLEVLK	Q			Cmpd 635, AutoMSn(737.8494), 25.4 min	emPAI	0.07
120	gi|545889107	PREDICTED: thyroid adenoma-associated protein homolog, partial [Sus scrofa]	42	13894	5	0	1	0	5.7	8.58	2241	1	1	1	468.254	934.494	2	934.452	0.042	0	25.83	51	M	VLVCCWR	S	Carbamidomethyl (C)	0.0001000.0	Cmpd 107, AutoMSn(468.2541), 13.2 min
120	gi|545889107	PREDICTED: thyroid adenoma-associated protein homolog, partial [Sus scrofa]	42	13894	5	0	1	0	5.7	8.58	2242	1	1	1	468.254	934.494	2	934.452	0.0424	0	34.98	6.2	M	VLVCCWR	S	Carbamidomethyl (C)	0.0001000.0	Cmpd 113, AutoMSn(468.2543), 13.3 min
120	gi|545889107	PREDICTED: thyroid adenoma-associated protein homolog, partial [Sus scrofa]	42	13894	5	0	1	0	5.7	8.58	2243	1	1	1	468.255	934.495	2	934.452	0.0435	0	40.91	1.6	M	VLVCCWR	S	Carbamidomethyl (C)	0.0001000.0	Cmpd 3, AutoMSn(468.2549), 13.2 min
120	gi|545889107	PREDICTED: thyroid adenoma-associated protein homolog, partial [Sus scrofa]	42	13894	5	0	1	0	5.7	8.58	2244	1	1	1	468.255	934.495	2	934.452	0.0436	0	20.76	170	M	VLVCCWR	S	Carbamidomethyl (C)	0.0001000.0	Cmpd 97, AutoMSn(468.2549), 13.3 min
120	gi|545889107	PREDICTED: thyroid adenoma-associated protein homolog, partial [Sus scrofa]	42	13894	5	0	1	0	5.7	8.58	2245	1	1	1	468.255	934.496	2	934.452	0.0442	0	41.06	1.5	M	VLVCCWR	S	Carbamidomethyl (C)	0.0001000.0	Cmpd 109, AutoMSn(468.2552), 13.3 min	emPAI	0.25
121	gi|545191076	PREDICTED: keratin, type I cytoskeletal 18-like [Equus caballus]	41	48915	3	0	2	0	3.7	5.74	1730	1	0	0	404.21	806.406	2	806.392	0.0136	0	35.76	4.9	R	LAADDFR	V			Cmpd 188, AutoMSn(404.2102), 15.6 min
121	gi|545191076	PREDICTED: keratin, type I cytoskeletal 18-like [Equus caballus]	41	48915	3	0	2	0	3.7	5.74	2785	1	0	1	554.276	1106.54	2	1106.57	-0.0341	1	27.05	35	R	AQYEELARK	N			Cmpd 131, AutoMSn(554.2762), 14.3 min
121	gi|545191076	PREDICTED: keratin, type I cytoskeletal 18-like [Equus caballus]	41	48915	3	0	2	0	3.7	5.74	2786	1	0	1	554.277	1106.54	2	1106.57	-0.0326	1	41.08	1.4	R	AQYEELARK	N			Cmpd 157, AutoMSn(554.2770), 14.3 min	emPAI	0.07
122	gi|620966311	PREDICTED: keratin, type II cytoskeletal 1-like [Ornithorhynchus anatinus]	41	118205	3	0	2	0	1.9	5.38	2785	1	0	0	554.276	1106.54	2	1106.54	0.0022	0	27.05	35	K	AQYEEIAQR	S			Cmpd 131, AutoMSn(554.2762), 14.3 min
122	gi|620966311	PREDICTED: keratin, type II cytoskeletal 1-like [Ornithorhynchus anatinus]	41	118205	3	0	2	0	1.9	5.38	2786	1	0	0	554.277	1106.54	2	1106.54	0.0038	0	41.08	1.4	K	AQYEEIAQR	S			Cmpd 157, AutoMSn(554.2770), 14.3 min
122	gi|620966311	PREDICTED: keratin, type II cytoskeletal 1-like [Ornithorhynchus anatinus]	41	118205	3	0	2	0	1.9	5.38	4239	6	0	1	730.907	1459.8	2	1459.8	-0.0049	1	11.18	1200	K	VEGLQREIEFLK	V			Cmpd 624, AutoMSn(730.9065), 25.2 min	emPAI	0.03
123	gi|542203219	PREDICTED: LOW QUALITY PROTEIN: nebulin-like [Oreochromis niloticus]	41	650365	2	0	1	0	0.2	9.27	2785	1	0	1	554.276	1106.54	2	1106.6	-0.0593	1	27.05	35	K	AQYEEIKVK	N			Cmpd 131, AutoMSn(554.2762), 14.3 min
123	gi|542203219	PREDICTED: LOW QUALITY PROTEIN: nebulin-like [Oreochromis niloticus]	41	650365	2	0	1	0	0.2	9.27	2786	1	0	1	554.277	1106.54	2	1106.6	-0.0578	1	41.08	1.4	K	AQYEEIKVK	N			Cmpd 157, AutoMSn(554.2770), 14.3 min	emPAI	0.01
124	gi|675407109	PREDICTED: LOW QUALITY PROTEIN: dynein heavy chain 9, axonemal, partial [Manacus vitellinus]	41	495895	1	0	1	0	0.3	5.69	4451	1	1	1	771.901	1541.79	2	1541.86	-0.072	0	41.06	1.1	K	VTLAVTPSNGLLAMR	A			Cmpd 455, AutoMSn(771.9012), 20.0 min	emPAI	0.01
125	gi|675674676	PREDICTED: transmembrane protein 139 isoform X2 [Callithrix jacchus]	41	23293	1	0	1	0	3.3	4.59	2181	1	1	1	452.755	903.495	2	903.409	0.0859	0	40.86	1.6	M	WGLEEDR	S			Cmpd 387, AutoMSn(452.7545), 18.9 min	emPAI	0.14
126	gi|59726986	acidic phospholipase A2 [Bothriechis schlegelii]	40	15435	3	0	1	0	5.1	4.47	2331	1	1	1	487.74	973.466	2	973.47	-0.004	0	40.37	1.7	K	YWFYPAK	Y			Cmpd 423, AutoMSn(487.7401), 20.5 min
126	gi|59726986	acidic phospholipase A2 [Bothriechis schlegelii]	40	15435	3	0	1	0	5.1	4.47	2332	1	1	1	487.743	973.47	2	973.47	0.0007	0	13.93	770	K	YWFYPAK	Y			Cmpd 427, AutoMSn(487.7425), 20.6 min
126	gi|59726986	acidic phospholipase A2 [Bothriechis schlegelii]	40	15435	3	0	1	0	5.1	4.47	2333	1	1	1	487.747	973.479	2	973.47	0.009	0	35.06	5.9	K	YWFYPAK	Y			Cmpd 424, AutoMSn(487.7467), 20.6 min	emPAI	0.22
127	gi|471359519	PREDICTED: zinc finger protein 334 isoform 1 [Trichechus manatus latirostris]	40	79899	1	0	1	0	1	9.09	1719	1	1	1	401.757	801.499	2	801.496	0.0031	0	40.35	2.1	R	TVLITQK	K			Cmpd 170, AutoMSn(401.7568), 14.6 min	emPAI	0.04
128	gi|529434337	PREDICTED: glycoprotein endo-alpha-1,2-mannosidase [Falco peregrinus]	40	52979	1	0	1	0	1.5	8.62	1719	1	0	1	401.757	801.499	2	801.46	0.0395	0	40.35	2.1	R	TVLLDNK	Q			Cmpd 170, AutoMSn(401.7568), 14.6 min	emPAI	0.06
129	gi|564241387	PREDICTED: putative GTP-binding protein 6 [Alligator mississippiensis]	40	46793	1	0	1	0	1.9	9.26	1719	1	0	1	401.757	801.499	2	801.496	0.0031	0	40.35	2.1	R	TVLIATGK	K			Cmpd 170, AutoMSn(401.7568), 14.6 min	emPAI	0.07
130	gi|667314254	PREDICTED: LOW QUALITY PROTEIN: melanoma inhibitory activity protein 3-like [Galeopterus variegatus]	40	183139	1	0	1	0	0.4	4.78	1719	1	0	1	401.757	801.499	2	801.532	-0.0333	1	40.35	2.1	R	TVLLTKK	S			Cmpd 170, AutoMSn(401.7568), 14.6 min	emPAI	0.02
131	gi|676582412	Low-density lipoprotein receptor-related protein 2, partial [Cuculus canorus]	40	517555	1	0	1	0	0.2	4.85	1719	1	0	1	401.757	801.499	2	801.46	0.0395	0	40.35	2.1	R	TVIIDNK	I			Cmpd 170, AutoMSn(401.7568), 14.6 min	emPAI	0.01
132	gi|676722420	Glycoprotein endo-alpha-1,2-mannosidase, partial [Buceros rhinoceros silvestris]	40	53885	1	0	1	0	1.5	8.45	1719	1	0	1	401.757	801.499	2	801.46	0.0395	0	40.35	2.1	R	TVILDNK	Q			Cmpd 170, AutoMSn(401.7568), 14.6 min	emPAI	0.06
133	gi|679209545	Glycoprotein endo-alpha-1,2-mannosidase, partial [Phalacrocorax carbo]	40	53891	1	0	1	0	1.5	8.45	1719	1	0	1	401.757	801.499	2	801.46	0.0395	0	40.35	2.1	R	TVLIDNK	Q			Cmpd 170, AutoMSn(401.7568), 14.6 min	emPAI	0.06
134	gi|344280056	PREDICTED: zinc finger protein 334 isoform X2 [Loxodonta africana]	40	80480	1	0	1	0	1	9.14	1719	1	0	1	401.757	801.499	2	801.496	0.0031	0	40.35	2.1	R	TVLLTQK	S			Cmpd 170, AutoMSn(401.7568), 14.6 min	emPAI	0.04
135	gi|124007127	RecName: Full=CLIP-associating protein 1; AltName: Full=Cytoplasmic linker-associated protein 1 [Mus musculus]	40	169123	2	0	1	0	1.2	9.15	4656	1	1	1	809.376	1616.74	2	1616.85	-0.1098	1	39.7	1.5	R	SSSPGKLLGSGLAGGSSR	G			Cmpd 579, AutoMSn(809.3765), 24.0 min
135	gi|124007127	RecName: Full=CLIP-associating protein 1; AltName: Full=Cytoplasmic linker-associated protein 1 [Mus musculus]	40	169123	2	0	1	0	1.2	9.15	4657	1	1	1	809.38	1616.75	2	1616.85	-0.102	1	29.74	15	R	SSSPGKLLGSGLAGGSSR	G			Cmpd 581, AutoMSn(809.3804), 24.1 min	emPAI	0.02
136	gi|617493991	PREDICTED: protein regulator of cytokinesis 1-like [Poecilia formosa]	40	69535	3	0	1	0	2	6.25	4296	2	1	1	741.1	1480.19	2	1480.72	-0.5307	1	21.42	210	K	MHSMKSFIEAIR	A	2 Oxidation (M)	0.200200000000.0	Cmpd 675, AutoMSn(741.1002), 25.6 min
136	gi|617493991	PREDICTED: protein regulator of cytokinesis 1-like [Poecilia formosa]	40	69535	3	0	1	0	2	6.25	4298	1	1	1	741.101	1480.19	2	1480.72	-0.5283	1	39.69	3.1	K	MHSMKSFIEAIR	A	2 Oxidation (M)	0.200200000000.0	Cmpd 584, AutoMSn(741.1014), 25.6 min
136	gi|617493991	PREDICTED: protein regulator of cytokinesis 1-like [Poecilia formosa]	40	69535	3	0	1	0	2	6.25	4299	10	1	1	741.105	1480.19	2	1480.72	-0.5222	1	18.85	370	K	MHSMKSFIEAIR	A	2 Oxidation (M)	0.200200000000.0	Cmpd 640, AutoMSn(741.1045), 25.6 min	emPAI	0.05
137	gi|395849386	PREDICTED: ferritin heavy chain-like [Otolemur garnettii]	39	20736	3	0	1	0	5.5	5.31	2587	5	0	1	530.785	1059.56	2	1059.52	0.0364	1	23.05	95	K	LTLGGNDKEN	-			Cmpd 331, AutoMSn(530.7853), 18.8 min
137	gi|395849386	PREDICTED: ferritin heavy chain-like [Otolemur garnettii]	39	20736	3	0	1	0	5.5	5.31	2589	5	0	1	530.787	1059.56	2	1059.52	0.0406	1	33.09	9.4	K	LTLGGNDKEN	-			Cmpd 334, AutoMSn(530.7874), 18.9 min
137	gi|395849386	PREDICTED: ferritin heavy chain-like [Otolemur garnettii]	39	20736	3	0	1	0	5.5	5.31	2595	1	0	1	530.79	1059.56	2	1059.52	0.0451	1	39.42	2.2	K	LTLGGNDKEN	-			Cmpd 222, AutoMSn(530.7896), 18.9 min	emPAI	0.16
138	gi|556948778	PREDICTED: solute carrier family 2, facilitated glucose transporter member 11-like [Latimeria chalumnae]	39	56663	6	0	2	0	5.7	6.75	4294	5	1	1	740.85	1479.69	2	1479.74	-0.0498	0	19.42	160	K	SIWELFTDQSVR	W			Cmpd 619, AutoMSn(740.8503), 25.6 min
138	gi|556948778	PREDICTED: solute carrier family 2, facilitated glucose transporter member 11-like [Latimeria chalumnae]	39	56663	6	0	2	0	5.7	6.75	4296	4	0	1	741.1	1480.19	2	1479.74	0.4501	0	19.14	350	K	SIWELFTDQSVR	W			Cmpd 675, AutoMSn(741.1002), 25.6 min
138	gi|556948778	PREDICTED: solute carrier family 2, facilitated glucose transporter member 11-like [Latimeria chalumnae]	39	56663	6	0	2	0	5.7	6.75	4297	10	1	1	741.101	1480.19	2	1479.74	0.4513	0	17.11	560	K	SIWELFTDQSVR	W			Cmpd 614, AutoMSn(741.1008), 25.6 min
138	gi|556948778	PREDICTED: solute carrier family 2, facilitated glucose transporter member 11-like [Latimeria chalumnae]	39	56663	6	0	2	0	5.7	6.75	4298	2	0	1	741.101	1480.19	2	1479.74	0.4525	0	39.22	3.4	K	SIWELFTDQSVR	W			Cmpd 584, AutoMSn(741.1014), 25.6 min
138	gi|556948778	PREDICTED: solute carrier family 2, facilitated glucose transporter member 11-like [Latimeria chalumnae]	39	56663	6	0	2	0	5.7	6.75	4299	5	0	1	741.105	1480.19	2	1479.74	0.4586	0	19.58	320	K	SIWELFTDQSVR	W			Cmpd 640, AutoMSn(741.1045), 25.6 min
138	gi|556948778	PREDICTED: solute carrier family 2, facilitated glucose transporter member 11-like [Latimeria chalumnae]	39	56663	6	0	2	0	5.7	6.75	4994	7	1	1	577.932	1730.77	3	1730.97	-0.1975	1	12.91	710	R	LRGAITVTSATCIALGK	F	Carbamidomethyl (C)	0.00000000000100000.0	Cmpd 14, AutoMSn(577.9319), 9.0 min	emPAI	0.06
139	gi|123900232	RecName: Full=Zinc metalloproteinase-disintegrin-like stejnihagin-B; AltName: Full=Snake venom metalloproteinase; Short=SVMP; Flags: Precursor [Trimeresurus stejnegeri]	39	67654	3	0	1	0	3.2	5.61	5854	1	1	1	700.679	2099.01	3	2099.01	0.0039	0	31.42	8.5	R	HDCAQLLTAIDFDGPTIGR	A	Carbamidomethyl (C)	0.0010000000000000000.0	Cmpd 551, AutoMSn(700.6788), 23.4 min
139	gi|123900232	RecName: Full=Zinc metalloproteinase-disintegrin-like stejnihagin-B; AltName: Full=Snake venom metalloproteinase; Short=SVMP; Flags: Precursor [Trimeresurus stejnegeri]	39	67654	3	0	1	0	3.2	5.61	5857	1	1	1	700.688	2099.04	3	2099.01	0.0316	0	31.95	7.6	R	HDCAQLLTAIDFDGPTIGR	A	Carbamidomethyl (C)	0.0010000000000000000.0	Cmpd 559, AutoMSn(700.6880), 23.4 min
139	gi|123900232	RecName: Full=Zinc metalloproteinase-disintegrin-like stejnihagin-B; AltName: Full=Snake venom metalloproteinase; Short=SVMP; Flags: Precursor [Trimeresurus stejnegeri]	39	67654	3	0	1	0	3.2	5.61	5858	1	1	1	700.689	2099.04	3	2099.01	0.0335	0	38.7	1.6	R	HDCAQLLTAIDFDGPTIGR	A	Carbamidomethyl (C)	0.0010000000000000000.0	Cmpd 545, AutoMSn(700.6886), 23.4 min	emPAI	0.05
140	gi|7245412	Chain A, Crystal Structure Of Flavocetin-A From The Habu Snake Venom, A Novel Cyclic Tetramer Of C-Type Lectin-Like Heterodimers	38	15640	2	0	1	0	8.1	5.09	3916	1	1	1	685.37	1368.73	2	1368.72	0.0063	0	37.79	2.5	K	TSFQYVWIGLR	I			Cmpd 579, AutoMSn(685.3699), 24.4 min
140	gi|7245412	Chain A, Crystal Structure Of Flavocetin-A From The Habu Snake Venom, A Novel Cyclic Tetramer Of C-Type Lectin-Like Heterodimers	38	15640	2	0	1	0	8.1	5.09	3917	3	1	1	685.37	1368.73	2	1368.72	0.0075	0	28.67	21	K	TSFQYVWIGLR	I			Cmpd 578, AutoMSn(685.3705), 24.4 min	emPAI	0.22
141	gi|6093636	RecName: Full=L-amino-acid oxidase; Short=LAAO; Short=LAO; AltName: Full=Apoxin I; AltName: Full=Apoxin-1; Flags: Precursor [Crotalus adamanteus]	37	58625	23	0	5	0	6.2	6.3	1155	1	0	0	664.784	663.777	1	664.38	-0.6029	0	9.93	4200	K	EYLLK	E			Cmpd 166, AutoMSn(664.7840), 15.1 min
141	gi|6093636	RecName: Full=L-amino-acid oxidase; Short=LAAO; Short=LAO; AltName: Full=Apoxin I; AltName: Full=Apoxin-1; Flags: Precursor [Crotalus adamanteus]	37	58625	23	0	5	0	6.2	6.3	2034	1	0	0	438.725	875.436	2	875.435	0.0013	0	41.54	1.5	K	STTDLPSR	F			Cmpd 65, AutoMSn(438.7254), 12.8 min
141	gi|6093636	RecName: Full=L-amino-acid oxidase; Short=LAAO; Short=LAO; AltName: Full=Apoxin I; AltName: Full=Apoxin-1; Flags: Precursor [Crotalus adamanteus]	37	58625	23	0	5	0	6.2	6.3	2035	1	0	0	438.726	875.438	2	875.435	0.0028	0	40.4	2	K	STTDLPSR	F			Cmpd 94, AutoMSn(438.7261), 12.9 min
141	gi|6093636	RecName: Full=L-amino-acid oxidase; Short=LAAO; Short=LAO; AltName: Full=Apoxin I; AltName: Full=Apoxin-1; Flags: Precursor [Crotalus adamanteus]	37	58625	23	0	5	0	6.2	6.3	2036	1	0	0	438.728	875.442	2	875.435	0.0074	0	22.92	110	K	STTDLPSR	F			Cmpd 138, AutoMSn(438.7284), 12.9 min
141	gi|6093636	RecName: Full=L-amino-acid oxidase; Short=LAAO; Short=LAO; AltName: Full=Apoxin I; AltName: Full=Apoxin-1; Flags: Precursor [Crotalus adamanteus]	37	58625	23	0	5	0	6.2	6.3	2037	1	0	0	438.729	875.444	2	875.435	0.0093	0	26.75	45	K	STTDLPSR	F			Cmpd 139, AutoMSn(438.7294), 12.9 min
141	gi|6093636	RecName: Full=L-amino-acid oxidase; Short=LAAO; Short=LAO; AltName: Full=Apoxin I; AltName: Full=Apoxin-1; Flags: Precursor [Crotalus adamanteus]	37	58625	23	0	5	0	6.2	6.3	2055	1	0	0	882.472	881.465	1	881.468	-0.0036	0	35.83	3.9	K	IFLTCTK	K	Carbamidomethyl (C)	0.0000100.0	Cmpd 260, AutoMSn(882.4717), 16.6 min
141	gi|6093636	RecName: Full=L-amino-acid oxidase; Short=LAAO; Short=LAO; AltName: Full=Apoxin I; AltName: Full=Apoxin-1; Flags: Precursor [Crotalus adamanteus]	37	58625	23	0	5	0	6.2	6.3	2056	1	0	0	441.743	881.47	2	881.468	0.0024	0	35.58	4.1	K	IFLTCTK	K	Carbamidomethyl (C)	0.0000100.0	Cmpd 262, AutoMSn(441.7425), 16.7 min
141	gi|6093636	RecName: Full=L-amino-acid oxidase; Short=LAAO; Short=LAO; AltName: Full=Apoxin I; AltName: Full=Apoxin-1; Flags: Precursor [Crotalus adamanteus]	37	58625	23	0	5	0	6.2	6.3	2057	1	0	0	441.743	881.471	2	881.468	0.0034	0	34.43	5.4	K	IFLTCTK	K	Carbamidomethyl (C)	0.0000100.0	Cmpd 303, AutoMSn(441.7430), 16.6 min
141	gi|6093636	RecName: Full=L-amino-acid oxidase; Short=LAAO; Short=LAO; AltName: Full=Apoxin I; AltName: Full=Apoxin-1; Flags: Precursor [Crotalus adamanteus]	37	58625	23	0	5	0	6.2	6.3	2058	1	0	0	441.743	881.472	2	881.468	0.0041	0	41.17	1.1	K	IFLTCTK	K	Carbamidomethyl (C)	0.0000100.0	Cmpd 228, AutoMSn(441.7434), 16.5 min
141	gi|6093636	RecName: Full=L-amino-acid oxidase; Short=LAAO; Short=LAO; AltName: Full=Apoxin I; AltName: Full=Apoxin-1; Flags: Precursor [Crotalus adamanteus]	37	58625	23	0	5	0	6.2	6.3	2061	2	0	0	441.744	881.473	2	881.468	0.0047	0	19.37	170	K	IFLTCTK	K	Carbamidomethyl (C)	0.0000100.0	Cmpd 301, AutoMSn(441.7437), 16.5 min
141	gi|6093636	RecName: Full=L-amino-acid oxidase; Short=LAAO; Short=LAO; AltName: Full=Apoxin I; AltName: Full=Apoxin-1; Flags: Precursor [Crotalus adamanteus]	37	58625	23	0	5	0	6.2	6.3	2062	1	0	0	441.744	881.473	2	881.468	0.0052	0	35.72	4	K	IFLTCTK	K	Carbamidomethyl (C)	0.0000100.0	Cmpd 259, AutoMSn(441.7439), 16.6 min
141	gi|6093636	RecName: Full=L-amino-acid oxidase; Short=LAAO; Short=LAO; AltName: Full=Apoxin I; AltName: Full=Apoxin-1; Flags: Precursor [Crotalus adamanteus]	37	58625	23	0	5	0	6.2	6.3	2063	1	0	0	441.745	881.475	2	881.468	0.0064	0	34.95	4.8	K	IFLTCTK	K	Carbamidomethyl (C)	0.0000100.0	Cmpd 306, AutoMSn(441.7445), 16.7 min
141	gi|6093636	RecName: Full=L-amino-acid oxidase; Short=LAAO; Short=LAO; AltName: Full=Apoxin I; AltName: Full=Apoxin-1; Flags: Precursor [Crotalus adamanteus]	37	58625	23	0	5	0	6.2	6.3	2064	1	0	0	441.745	881.475	2	881.468	0.0065	0	32.92	7.6	K	IFLTCTK	K	Carbamidomethyl (C)	0.0000100.0	Cmpd 252, AutoMSn(441.7446), 16.7 min
141	gi|6093636	RecName: Full=L-amino-acid oxidase; Short=LAAO; Short=LAO; AltName: Full=Apoxin I; AltName: Full=Apoxin-1; Flags: Precursor [Crotalus adamanteus]	37	58625	23	0	5	0	6.2	6.3	2065	1	0	0	441.745	881.475	2	881.468	0.0072	0	35.62	4.1	K	IFLTCTK	K	Carbamidomethyl (C)	0.0000100.0	Cmpd 231, AutoMSn(441.7449), 16.6 min
141	gi|6093636	RecName: Full=L-amino-acid oxidase; Short=LAAO; Short=LAO; AltName: Full=Apoxin I; AltName: Full=Apoxin-1; Flags: Precursor [Crotalus adamanteus]	37	58625	23	0	5	0	6.2	6.3	2066	1	0	0	441.745	881.476	2	881.468	0.0075	0	35.22	4.5	K	IFLTCTK	K	Carbamidomethyl (C)	0.0000100.0	Cmpd 256, AutoMSn(441.7451), 16.5 min
141	gi|6093636	RecName: Full=L-amino-acid oxidase; Short=LAAO; Short=LAO; AltName: Full=Apoxin I; AltName: Full=Apoxin-1; Flags: Precursor [Crotalus adamanteus]	37	58625	23	0	5	0	6.2	6.3	2067	1	0	0	441.746	881.477	2	881.468	0.0093	0	40.97	1.2	K	IFLTCTK	K	Carbamidomethyl (C)	0.0000100.0	Cmpd 249, AutoMSn(441.7460), 16.6 min
141	gi|6093636	RecName: Full=L-amino-acid oxidase; Short=LAAO; Short=LAO; AltName: Full=Apoxin I; AltName: Full=Apoxin-1; Flags: Precursor [Crotalus adamanteus]	37	58625	23	0	5	0	6.2	6.3	3389	1	0	0	420.863	1259.57	3	1259.56	0.0099	0	15.5	470	K	FWEDDGIHGGK	S			Cmpd 268, AutoMSn(420.8629), 15.8 min
141	gi|6093636	RecName: Full=L-amino-acid oxidase; Short=LAAO; Short=LAO; AltName: Full=Apoxin I; AltName: Full=Apoxin-1; Flags: Precursor [Crotalus adamanteus]	37	58625	23	0	5	0	6.2	6.3	3390	1	0	0	420.863	1259.57	3	1259.56	0.0103	0	19.27	200	K	FWEDDGIHGGK	S			Cmpd 272, AutoMSn(420.8631), 15.9 min
141	gi|6093636	RecName: Full=L-amino-acid oxidase; Short=LAAO; Short=LAO; AltName: Full=Apoxin I; AltName: Full=Apoxin-1; Flags: Precursor [Crotalus adamanteus]	37	58625	23	0	5	0	6.2	6.3	3391	1	0	0	420.864	1259.57	3	1259.56	0.012	0	23.14	81	K	FWEDDGIHGGK	S			Cmpd 225, AutoMSn(420.8637), 15.8 min
141	gi|6093636	RecName: Full=L-amino-acid oxidase; Short=LAAO; Short=LAO; AltName: Full=Apoxin I; AltName: Full=Apoxin-1; Flags: Precursor [Crotalus adamanteus]	37	58625	23	0	5	0	6.2	6.3	4052	1	0	0	463.561	1387.66	3	1387.65	0.0096	1	22.81	84	K	KFWEDDGIHGGK	S			Cmpd 172, AutoMSn(463.5612), 14.7 min
141	gi|6093636	RecName: Full=L-amino-acid oxidase; Short=LAAO; Short=LAO; AltName: Full=Apoxin I; AltName: Full=Apoxin-1; Flags: Precursor [Crotalus adamanteus]	37	58625	23	0	5	0	6.2	6.3	4053	1	0	0	463.561	1387.66	3	1387.65	0.0097	1	15.61	440	K	KFWEDDGIHGGK	S			Cmpd 217, AutoMSn(463.5612), 14.7 min
141	gi|6093636	RecName: Full=L-amino-acid oxidase; Short=LAAO; Short=LAO; AltName: Full=Apoxin I; AltName: Full=Apoxin-1; Flags: Precursor [Crotalus adamanteus]	37	58625	23	0	5	0	6.2	6.3	4055	1	0	0	463.563	1387.67	3	1387.65	0.0139	1	32.72	8.6	K	KFWEDDGIHGGK	S			Cmpd 141, AutoMSn(463.5626), 14.6 min
141	gi|6093636	RecName: Full=L-amino-acid oxidase; Short=LAAO; Short=LAO; AltName: Full=Apoxin I; AltName: Full=Apoxin-1; Flags: Precursor [Crotalus adamanteus]	37	58625	23	0	5	0	6.2	6.3	4056	1	0	0	463.564	1387.67	3	1387.65	0.0168	1	39.19	1.9	K	KFWEDDGIHGGK	S			Cmpd 169, AutoMSn(463.5636), 14.6 min	emPAI	0.06
142	gi|635137520	PREDICTED: uncharacterized protein LOC103246114 [Chlorocebus sabaeus]	37	57920	7	0	1	0	1.6	10.95	2632	3	1	1	535.746	1069.48	2	1069.44	0.0382	0	11.73	1100	R	GCLWVMMAA	-	Carbamidomethyl (C); 2 Oxidation (M)	0.010002200.0	Cmpd 401, AutoMSn(535.7461), 18.8 min
142	gi|635137520	PREDICTED: uncharacterized protein LOC103246114 [Chlorocebus sabaeus]	37	57920	7	0	1	0	1.6	10.95	2633	7	1	1	535.747	1069.48	2	1069.44	0.0405	0	10.2	1600	R	GCLWVMMAA	-	Carbamidomethyl (C); 2 Oxidation (M)	0.010002200.0	Cmpd 359, AutoMSn(535.7473), 18.8 min
142	gi|635137520	PREDICTED: uncharacterized protein LOC103246114 [Chlorocebus sabaeus]	37	57920	7	0	1	0	1.6	10.95	2634	1	1	1	535.748	1069.48	2	1069.44	0.0423	0	36.58	3.6	R	GCLWVMMAA	-	Carbamidomethyl (C); 2 Oxidation (M)	0.010002200.0	Cmpd 355, AutoMSn(535.7482), 18.8 min
142	gi|635137520	PREDICTED: uncharacterized protein LOC103246114 [Chlorocebus sabaeus]	37	57920	7	0	1	0	1.6	10.95	2635	5	1	1	535.749	1069.48	2	1069.44	0.0432	0	13.61	720	R	GCLWVMMAA	-	Carbamidomethyl (C); 2 Oxidation (M)	0.010002200.0	Cmpd 399, AutoMSn(535.7486), 18.7 min
142	gi|635137520	PREDICTED: uncharacterized protein LOC103246114 [Chlorocebus sabaeus]	37	57920	7	0	1	0	1.6	10.95	2636	1	1	1	535.749	1069.48	2	1069.44	0.0433	0	17.06	320	R	GCLWVMMAA	-	Carbamidomethyl (C); 2 Oxidation (M)	0.010002200.0	Cmpd 353, AutoMSn(535.7487), 18.7 min
142	gi|635137520	PREDICTED: uncharacterized protein LOC103246114 [Chlorocebus sabaeus]	37	57920	7	0	1	0	1.6	10.95	2637	1	1	1	535.749	1069.48	2	1069.44	0.0438	0	17.33	310	R	GCLWVMMAA	-	Carbamidomethyl (C); 2 Oxidation (M)	0.010002200.0	Cmpd 349, AutoMSn(535.7489), 18.8 min
142	gi|635137520	PREDICTED: uncharacterized protein LOC103246114 [Chlorocebus sabaeus]	37	57920	7	0	1	0	1.6	10.95	2640	2	1	1	535.752	1069.49	2	1069.44	0.0498	0	18.02	260	R	GCLWVMMAA	-	Carbamidomethyl (C); 2 Oxidation (M)	0.010002200.0	Cmpd 351, AutoMSn(535.7519), 18.8 min	emPAI	0.06
143	gi|657552473	PREDICTED: ubiquitin domain-containing protein 1-like [Stegastes partitus]	36	28727	1	0	1	0	6.3	8.92	3003	1	1	1	579.53	1735.57	3	1734.88	0.6851	1	36.44	14	K	DVRLTASMADSIAELK	K	Oxidation (M)	0.0000000200000000.0	Cmpd 713, AutoMSn(579.5297), 33.1 min	emPAI	0.12
144	gi|344268956	PREDICTED: phorbol-12-myristate-13-acetate-induced protein 1 [Loxodonta africana]	36	6008	2	0	1	0	12.7	10.06	1956	3	0	1	430.25	858.486	2	858.5	-0.014	0	34.66	7.3	K	LLNVICK	L	Carbamidomethyl (C)	0.0000010.0	Cmpd 105, AutoMSn(430.2501), 13.8 min
144	gi|344268956	PREDICTED: phorbol-12-myristate-13-acetate-induced protein 1 [Loxodonta africana]	36	6008	2	0	1	0	12.7	10.06	1957	1	0	1	430.251	858.487	2	858.5	-0.0129	0	36.23	5.1	K	LLNVICK	L	Carbamidomethyl (C)	0.0000010.0	Cmpd 103, AutoMSn(430.2506), 13.7 min	emPAI	0.6
145	gi|537134940	olfactory receptor [Cricetulus griseus]	36	32604	2	0	1	0	2.7	8.96	1956	3	0	1	430.25	858.486	2	858.492	-0.0066	0	34.66	7.3	R	LLNVSGTR	D			Cmpd 105, AutoMSn(430.2501), 13.8 min
145	gi|537134940	olfactory receptor [Cricetulus griseus]	36	32604	2	0	1	0	2.7	8.96	1957	1	0	1	430.251	858.487	2	858.492	-0.0056	0	36.23	5.1	R	LLNVSGTR	D			Cmpd 103, AutoMSn(430.2506), 13.7 min	emPAI	0.1
146	gi|577703065	Toll-like receptor 20 [Cyprinus carpio]	36	107862	2	0	1	0	0.7	5.91	1956	3	0	1	430.25	858.486	2	858.5	-0.014	0	34.66	7.3	K	ILNVCLK	D	Carbamidomethyl (C)	0.0000100.0	Cmpd 105, AutoMSn(430.2501), 13.8 min
146	gi|577703065	Toll-like receptor 20 [Cyprinus carpio]	36	107862	2	0	1	0	0.7	5.91	1957	1	0	1	430.251	858.487	2	858.5	-0.0129	0	36.23	5.1	K	ILNVCLK	D	Carbamidomethyl (C)	0.0000100.0	Cmpd 103, AutoMSn(430.2506), 13.7 min	emPAI	0.03
147	gi|560904199	PREDICTED: PDZK1-interacting protein 1 [Camelus ferus]	35	12021	1	0	1	0	14.2	4.74	3340	1	1	1	620.834	1859.48	3	1859.79	-0.311	0	35.16	12	R	SSEHENAYENIPEEGR	V			Cmpd 73, AutoMSn(620.8343), 11.8 min	emPAI	0.29
148	gi|674073002	PREDICTED: zinc finger protein 572 [Nannospalax galili]	34	53001	2	0	1	0	3.5	8.62	5025	6	1	1	578.312	1731.91	3	1731.8	0.1149	1	14.67	480	K	CLECGKSFSCNSTLIK	H			Cmpd 271, AutoMSn(578.3121), 16.9 min
148	gi|674073002	PREDICTED: zinc finger protein 572 [Nannospalax galili]	34	53001	2	0	1	0	3.5	8.62	5033	1	1	1	578.315	1731.92	3	1731.8	0.1239	1	34.08	5.6	K	CLECGKSFSCNSTLIK	H			Cmpd 230, AutoMSn(578.3151), 16.1 min	emPAI	0.06
149	gi|297593804	metalloproteinase [Echis carinatus sochureki]	34	69191	9	0	1	0	2.8	4.93	5916	3	1	1	1090.94	2179.88	2	2179.85	0.0208	0	15.41	450	K	LHSWVECEIGECCDQCR	F	3 Carbamidomethyl (C)	0.00000000000110010.0	Cmpd 230, AutoMSn(1090.9449), 16.0 min
149	gi|297593804	metalloproteinase [Echis carinatus sochureki]	34	69191	9	0	1	0	2.8	4.93	5918	3	1	1	727.635	2179.88	3	2179.85	0.03	0	18.21	230	K	LHSWVECEIGECCDQCR	F	3 Carbamidomethyl (C)	0.00000000000110010.0	Cmpd 226, AutoMSn(727.6354), 15.9 min
149	gi|297593804	metalloproteinase [Echis carinatus sochureki]	34	69191	9	0	1	0	2.8	4.93	5919	8	1	1	727.635	2179.88	3	2179.85	0.0304	0	17.15	290	K	LHSWVECEIGECCDQCR	F	3 Carbamidomethyl (C)	0.00000000000110010.0	Cmpd 273, AutoMSn(727.6355), 15.9 min
149	gi|297593804	metalloproteinase [Echis carinatus sochureki]	34	69191	9	0	1	0	2.8	4.93	5920	2	1	1	727.636	2179.88	3	2179.85	0.0305	0	21.21	110	K	LHSWVECEIGECCDQCR	F	3 Carbamidomethyl (C)	0.00000000000110010.0	Cmpd 218, AutoMSn(727.6356), 15.9 min
149	gi|297593804	metalloproteinase [Echis carinatus sochureki]	34	69191	9	0	1	0	2.8	4.93	5921	1	1	1	727.636	2179.89	3	2179.85	0.0325	0	23.21	72	K	LHSWVECEIGECCDQCR	F	3 Carbamidomethyl (C)	0.00000000000110010.0	Cmpd 270, AutoMSn(727.6362), 15.9 min
149	gi|297593804	metalloproteinase [Echis carinatus sochureki]	34	69191	9	0	1	0	2.8	4.93	5924	1	1	1	727.637	2179.89	3	2179.85	0.0343	0	20.44	140	K	LHSWVECEIGECCDQCR	F	3 Carbamidomethyl (C)	0.00000000000110010.0	Cmpd 233, AutoMSn(727.6368), 16.0 min
149	gi|297593804	metalloproteinase [Echis carinatus sochureki]	34	69191	9	0	1	0	2.8	4.93	5925	1	1	1	727.637	2179.89	3	2179.85	0.0355	0	24.29	56	K	LHSWVECEIGECCDQCR	F	3 Carbamidomethyl (C)	0.00000000000110010.0	Cmpd 221, AutoMSn(727.6372), 15.9 min
149	gi|297593804	metalloproteinase [Echis carinatus sochureki]	34	69191	9	0	1	0	2.8	4.93	5926	1	1	1	727.637	2179.89	3	2179.85	0.0357	0	31.67	10	K	LHSWVECEIGECCDQCR	F	3 Carbamidomethyl (C)	0.00000000000110010.0	Cmpd 228, AutoMSn(727.6373), 15.9 min
149	gi|297593804	metalloproteinase [Echis carinatus sochureki]	34	69191	9	0	1	0	2.8	4.93	5927	1	1	1	727.638	2179.89	3	2179.85	0.0364	0	33.79	6.3	K	LHSWVECEIGECCDQCR	F	3 Carbamidomethyl (C)	0.00000000000110010.0	Cmpd 225, AutoMSn(727.6375), 15.9 min	emPAI	0.05
150	gi|511885075	PREDICTED: periodic tryptophan protein 2 homolog [Mustela putorius furo]	34	122005	3	0	1	0	1.9	7.49	5834	1	1	1	1046.95	2091.88	2	2091.96	-0.081	0	27.81	24	K	AFTTVCYSADGQSVLAGGMSK	F			Cmpd 532, AutoMSn(1046.9470), 22.1 min
150	gi|511885075	PREDICTED: periodic tryptophan protein 2 homolog [Mustela putorius furo]	34	122005	3	0	1	0	1.9	7.49	5835	1	1	1	1046.95	2091.88	2	2091.96	-0.0805	0	33.66	6.2	K	AFTTVCYSADGQSVLAGGMSK	F			Cmpd 535, AutoMSn(1046.9473), 22.2 min
150	gi|511885075	PREDICTED: periodic tryptophan protein 2 homolog [Mustela putorius furo]	34	122005	3	0	1	0	1.9	7.49	5836	1	1	1	1046.95	2091.88	2	2091.96	-0.0793	0	27.68	24	K	AFTTVCYSADGQSVLAGGMSK	F			Cmpd 538, AutoMSn(1046.9479), 22.3 min	emPAI	0.03
151	gi|241994154	recombination activating protein 1, partial [Iodopleura isabellae]	33	109697	3	0	1	0	1.1	8.8	3353	1	1	1	622.829	1243.64	2	1243.68	-0.0418	0	33.31	7.7	K	EAVEAVCILIK	C	Carbamidomethyl (C)	0.00000010000.0	Cmpd 633, AutoMSn(622.8287), 24.5 min
151	gi|241994154	recombination activating protein 1, partial [Iodopleura isabellae]	33	109697	3	0	1	0	1.1	8.8	3354	1	1	1	622.829	1243.64	2	1243.68	-0.0407	0	25.1	51	K	EAVEAVCILIK	C	Carbamidomethyl (C)	0.00000010000.0	Cmpd 628, AutoMSn(622.8292), 24.3 min
151	gi|241994154	recombination activating protein 1, partial [Iodopleura isabellae]	33	109697	3	0	1	0	1.1	8.8	3355	1	1	1	622.831	1243.65	2	1243.68	-0.0378	0	28.87	21	K	EAVEAVCILIK	C	Carbamidomethyl (C)	0.00000010000.0	Cmpd 630, AutoMSn(622.8307), 24.4 min	emPAI	0.03
152	gi|533194612	PREDICTED: sodium/potassium-transporting ATPase subunit beta-1-interacting protein 4 isoform X2 [Chinchilla lanigera]	32	23112	2	0	1	0	2.9	6.03	892	1	1	1	318.297	634.58	2	635.339	-0.7594	0	32.35	41	K	QAHLPA	-			Cmpd 757, AutoMSn(318.2971), 30.2 min
152	gi|533194612	PREDICTED: sodium/potassium-transporting ATPase subunit beta-1-interacting protein 4 isoform X2 [Chinchilla lanigera]	32	23112	2	0	1	0	2.9	6.03	952	1	1	1	318.299	634.584	2	635.339	-0.7555	0	20.26	670	K	QAHLPA	-			Cmpd 586, AutoMSn(318.2991), 32.3 min	emPAI	0.15
153	gi|677429622	Eukaryotic translation initiation factor 5B, partial [Mesitornis unicolor]	32	136134	1	0	1	0	1.5	5.41	5295	1	1	1	600.521	1798.54	3	1798.89	-0.3534	1	32.14	15	K	AEEKASSEVLATPGPGEK	G			Cmpd 391, AutoMSn(600.5211), 19.0 min	emPAI	0.02
154	gi|82228618	RecName: Full=Zinc metalloproteinase-disintegrin-like VLAIP-B; AltName: Full=Snake venom metalloproteinase; Short=SVMP; Flags: Precursor [Macrovipera lebetina]	31	68798	4	0	1	0	3.4	5.93	6296	1	1	1	810.01	2427.01	3	2427.07	-0.0601	1	31.48	9.8	K	SCIMSGILRCETSYLFSDCSR	E	Carbamidomethyl (C)	0.000000000000000000100.0	Cmpd 399, AutoMSn(810.0103), 19.8 min
154	gi|82228618	RecName: Full=Zinc metalloproteinase-disintegrin-like VLAIP-B; AltName: Full=Snake venom metalloproteinase; Short=SVMP; Flags: Precursor [Macrovipera lebetina]	31	68798	4	0	1	0	3.4	5.93	6298	1	1	1	810.015	2427.02	3	2427.07	-0.0465	1	27.25	25	K	SCIMSGILRCETSYLFSDCSR	E	Carbamidomethyl (C)	0.000000000000000000100.0	Cmpd 402, AutoMSn(810.0148), 19.8 min
154	gi|82228618	RecName: Full=Zinc metalloproteinase-disintegrin-like VLAIP-B; AltName: Full=Snake venom metalloproteinase; Short=SVMP; Flags: Precursor [Macrovipera lebetina]	31	68798	4	0	1	0	3.4	5.93	6300	1	1	1	810.016	2427.03	3	2427.07	-0.0433	1	21.86	86	K	SCIMSGILRCETSYLFSDCSR	E	Carbamidomethyl (C)	0.000000000000000000100.0	Cmpd 400, AutoMSn(810.0159), 19.8 min
154	gi|82228618	RecName: Full=Zinc metalloproteinase-disintegrin-like VLAIP-B; AltName: Full=Snake venom metalloproteinase; Short=SVMP; Flags: Precursor [Macrovipera lebetina]	31	68798	4	0	1	0	3.4	5.93	6303	5	1	1	810.022	2427.05	3	2427.07	-0.0238	1	15.38	360	K	SCIMSGILRCETSYLFSDCSR	E	Carbamidomethyl (C)	0.000000000000000000100.0	Cmpd 397, AutoMSn(810.0224), 19.9 min	emPAI	0.05
155	gi|677783710	PREDICTED: exosome complex exonuclease RRP44, partial [Acanthisitta chloris]	30	103492	5	0	2	0	1.8	6.04	1716	1	1	1	401.75	801.486	2	801.496	-0.0102	1	28.66	31	K	AEILKTK	F			Cmpd 156, AutoMSn(401.7502), 14.5 min
155	gi|677783710	PREDICTED: exosome complex exonuclease RRP44, partial [Acanthisitta chloris]	30	103492	5	0	2	0	1.8	6.04	1719	9	0	1	401.757	801.499	2	801.496	0.0032	1	23.34	110	K	AEILKTK	F			Cmpd 170, AutoMSn(401.7568), 14.6 min
155	gi|677783710	PREDICTED: exosome complex exonuclease RRP44, partial [Acanthisitta chloris]	30	103492	5	0	2	0	1.8	6.04	1720	1	1	1	401.757	801.5	2	801.496	0.0042	1	27.76	38	K	AEILKTK	F			Cmpd 171, AutoMSn(401.7573), 14.7 min
155	gi|677783710	PREDICTED: exosome complex exonuclease RRP44, partial [Acanthisitta chloris]	30	103492	5	0	2	0	1.8	6.04	1721	1	1	1	401.758	801.501	2	801.496	0.0047	1	28.62	31	K	AEILKTK	F			Cmpd 165, AutoMSn(401.7576), 14.7 min
155	gi|677783710	PREDICTED: exosome complex exonuclease RRP44, partial [Acanthisitta chloris]	30	103492	5	0	2	0	1.8	6.04	2682	2	1	0	1084.54	1083.53	1	1083.65	-0.1137	1	23.19	79	K	IRMVLVEPK	V			Cmpd 139, AutoMSn(1084.5410), 13.9 min	emPAI	0.03
156	gi|591322757	PREDICTED: propionyl-CoA carboxylase beta chain, mitochondrial isoform X1 [Panthera tigris altaica]	30	61728	5	0	2	0	4	9.07	1716	1	0	1	401.75	801.486	2	801.442	0.0439	0	28.66	31	R	CPLLTQK	R			Cmpd 156, AutoMSn(401.7502), 14.5 min
156	gi|591322757	PREDICTED: propionyl-CoA carboxylase beta chain, mitochondrial isoform X1 [Panthera tigris altaica]	30	61728	5	0	2	0	4	9.07	1717	3	1	1	802.5	801.493	1	801.442	0.0513	0	24.7	77	R	CPLLTQK	R			Cmpd 172, AutoMSn(802.5005), 14.7 min
156	gi|591322757	PREDICTED: propionyl-CoA carboxylase beta chain, mitochondrial isoform X1 [Panthera tigris altaica]	30	61728	5	0	2	0	4	9.07	1720	1	0	1	401.757	801.5	2	801.442	0.0583	0	27.76	38	R	CPLLTQK	R			Cmpd 171, AutoMSn(401.7573), 14.7 min
156	gi|591322757	PREDICTED: propionyl-CoA carboxylase beta chain, mitochondrial isoform X1 [Panthera tigris altaica]	30	61728	5	0	2	0	4	9.07	1721	1	0	1	401.758	801.501	2	801.442	0.0589	0	28.62	31	R	CPLLTQK	R			Cmpd 165, AutoMSn(401.7576), 14.7 min
156	gi|591322757	PREDICTED: propionyl-CoA carboxylase beta chain, mitochondrial isoform X1 [Panthera tigris altaica]	30	61728	5	0	2	0	4	9.07	4923	7	1	0	858.419	1714.82	2	1714.94	-0.1166	1	11.37	990	R	HGAKLLYAFAEATVPK	V			Cmpd 451, AutoMSn(858.4193), 21.2 min	emPAI	0.05
157	gi|291190240	Transmembrane protein 43 [Salmo salar]	30	44726	4	0	1	0	1.7	5.55	1716	1	0	1	401.75	801.486	2	801.434	0.0513	0	28.66	31	K	AELINSR	N			Cmpd 156, AutoMSn(401.7502), 14.5 min
157	gi|291190240	Transmembrane protein 43 [Salmo salar]	30	44726	4	0	1	0	1.7	5.55	1720	1	0	1	401.757	801.5	2	801.434	0.0657	0	27.76	38	K	AELINSR	N			Cmpd 171, AutoMSn(401.7573), 14.7 min
157	gi|291190240	Transmembrane protein 43 [Salmo salar]	30	44726	4	0	1	0	1.7	5.55	1721	1	0	1	401.758	801.501	2	801.434	0.0663	0	28.62	31	K	AELINSR	N			Cmpd 165, AutoMSn(401.7576), 14.7 min
157	gi|291190240	Transmembrane protein 43 [Salmo salar]	30	44726	4	0	1	0	1.7	5.55	1722	1	1	1	401.758	801.502	2	801.434	0.0672	0	35.92	5.8	K	AELINSR	N			Cmpd 157, AutoMSn(401.7581), 14.6 min	emPAI	0.07
158	gi|521035771	F-box/LRR-repeat protein 19 [Myotis brandtii]	30	83931	4	0	1	0	1	9.38	1716	1	0	1	401.75	801.486	2	801.434	0.0513	0	28.66	31	R	AELLGSGR	K			Cmpd 156, AutoMSn(401.7502), 14.5 min
158	gi|521035771	F-box/LRR-repeat protein 19 [Myotis brandtii]	30	83931	4	0	1	0	1	9.38	1720	1	0	1	401.757	801.5	2	801.434	0.0657	0	27.76	38	R	AELLGSGR	K			Cmpd 171, AutoMSn(401.7573), 14.7 min
158	gi|521035771	F-box/LRR-repeat protein 19 [Myotis brandtii]	30	83931	4	0	1	0	1	9.38	1721	1	0	1	401.758	801.501	2	801.434	0.0663	0	28.62	31	R	AELLGSGR	K			Cmpd 165, AutoMSn(401.7576), 14.7 min
158	gi|521035771	F-box/LRR-repeat protein 19 [Myotis brandtii]	30	83931	4	0	1	0	1	9.38	1722	1	0	1	401.758	801.502	2	801.434	0.0672	0	35.92	5.8	R	AELLGSGR	K			Cmpd 157, AutoMSn(401.7581), 14.6 min	emPAI	0.04
159	gi|556988141	PREDICTED: sideroflexin-4 [Latimeria chalumnae]	30	35494	4	0	1	0	2.2	9.62	1716	1	0	1	401.75	801.486	2	801.434	0.0513	0	28.66	31	K	AEILNSR	T			Cmpd 156, AutoMSn(401.7502), 14.5 min
159	gi|556988141	PREDICTED: sideroflexin-4 [Latimeria chalumnae]	30	35494	4	0	1	0	2.2	9.62	1720	1	0	1	401.757	801.5	2	801.434	0.0657	0	27.76	38	K	AEILNSR	T			Cmpd 171, AutoMSn(401.7573), 14.7 min
159	gi|556988141	PREDICTED: sideroflexin-4 [Latimeria chalumnae]	30	35494	4	0	1	0	2.2	9.62	1721	1	0	1	401.758	801.501	2	801.434	0.0663	0	28.62	31	K	AEILNSR	T			Cmpd 165, AutoMSn(401.7576), 14.7 min
159	gi|556988141	PREDICTED: sideroflexin-4 [Latimeria chalumnae]	30	35494	4	0	1	0	2.2	9.62	1722	1	0	1	401.758	801.502	2	801.434	0.0672	0	35.92	5.8	K	AEILNSR	T			Cmpd 157, AutoMSn(401.7581), 14.6 min	emPAI	0.09
160	gi|642091513	unnamed protein product [Oncorhynchus mykiss]	30	307239	4	0	1	0	0.3	6.99	1716	1	0	1	401.75	801.486	2	801.434	0.0513	0	28.66	31	K	EAIISNR	N			Cmpd 156, AutoMSn(401.7502), 14.5 min
160	gi|642091513	unnamed protein product [Oncorhynchus mykiss]	30	307239	4	0	1	0	0.3	6.99	1720	1	0	1	401.757	801.5	2	801.434	0.0657	0	27.76	38	K	EAIISNR	N			Cmpd 171, AutoMSn(401.7573), 14.7 min
160	gi|642091513	unnamed protein product [Oncorhynchus mykiss]	30	307239	4	0	1	0	0.3	6.99	1721	1	0	1	401.758	801.501	2	801.434	0.0663	0	28.62	31	K	EAIISNR	N			Cmpd 165, AutoMSn(401.7576), 14.7 min
160	gi|642091513	unnamed protein product [Oncorhynchus mykiss]	30	307239	4	0	1	0	0.3	6.99	1722	1	0	1	401.758	801.502	2	801.434	0.0672	0	35.92	5.8	K	EAIISNR	N			Cmpd 157, AutoMSn(401.7581), 14.6 min	emPAI	0.01
161	gi|198428144	PREDICTED: cleavage and polyadenylation specificity factor subunit 2 [Ciona intestinalis]	30	88998	4	0	1	0	0.9	5.07	1716	1	0	1	401.75	801.486	2	801.496	-0.0102	1	28.66	31	K	AEIIKTK	M			Cmpd 156, AutoMSn(401.7502), 14.5 min
161	gi|198428144	PREDICTED: cleavage and polyadenylation specificity factor subunit 2 [Ciona intestinalis]	30	88998	4	0	1	0	0.9	5.07	1719	9	0	1	401.757	801.499	2	801.496	0.0032	1	23.34	110	K	AEIIKTK	M			Cmpd 170, AutoMSn(401.7568), 14.6 min
161	gi|198428144	PREDICTED: cleavage and polyadenylation specificity factor subunit 2 [Ciona intestinalis]	30	88998	4	0	1	0	0.9	5.07	1720	1	0	1	401.757	801.5	2	801.496	0.0042	1	27.76	38	K	AEIIKTK	M			Cmpd 171, AutoMSn(401.7573), 14.7 min
161	gi|198428144	PREDICTED: cleavage and polyadenylation specificity factor subunit 2 [Ciona intestinalis]	30	88998	4	0	1	0	0.9	5.07	1721	1	0	1	401.758	801.501	2	801.496	0.0047	1	28.62	31	K	AEIIKTK	M			Cmpd 165, AutoMSn(401.7576), 14.7 min	emPAI	0.04
162	gi|332244067	PREDICTED: LOW QUALITY PROTEIN: prolyl 4-hydroxylase subunit alpha-1 [Nomascus leucogenys]	30	57101	4	0	1	0	1.4	6.46	1716	1	0	1	401.75	801.486	2	801.496	-0.0102	1	28.66	31	K	AELLTKK	L			Cmpd 156, AutoMSn(401.7502), 14.5 min
162	gi|332244067	PREDICTED: LOW QUALITY PROTEIN: prolyl 4-hydroxylase subunit alpha-1 [Nomascus leucogenys]	30	57101	4	0	1	0	1.4	6.46	1717	3	0	1	802.5	801.493	1	801.496	-0.0028	1	24.7	77	K	AELLTKK	L			Cmpd 172, AutoMSn(802.5005), 14.7 min
162	gi|332244067	PREDICTED: LOW QUALITY PROTEIN: prolyl 4-hydroxylase subunit alpha-1 [Nomascus leucogenys]	30	57101	4	0	1	0	1.4	6.46	1720	1	0	1	401.757	801.5	2	801.496	0.0042	1	27.76	38	K	AELLTKK	L			Cmpd 171, AutoMSn(401.7573), 14.7 min
162	gi|332244067	PREDICTED: LOW QUALITY PROTEIN: prolyl 4-hydroxylase subunit alpha-1 [Nomascus leucogenys]	30	57101	4	0	1	0	1.4	6.46	1721	1	0	1	401.758	801.501	2	801.496	0.0047	1	28.62	31	K	AELLTKK	L			Cmpd 165, AutoMSn(401.7576), 14.7 min	emPAI	0.06
163	gi|449283244	Dynein heavy chain 8, axonemal, partial [Columba livia]	30	143096	3	0	1	0	0.6	7.91	1716	1	0	1	401.75	801.486	2	801.423	0.0625	0	28.66	31	R	AELLNDK	S			Cmpd 156, AutoMSn(401.7502), 14.5 min
163	gi|449283244	Dynein heavy chain 8, axonemal, partial [Columba livia]	30	143096	3	0	1	0	0.6	7.91	1720	1	0	1	401.757	801.5	2	801.423	0.0769	0	27.76	38	R	AELLNDK	S			Cmpd 171, AutoMSn(401.7573), 14.7 min
163	gi|449283244	Dynein heavy chain 8, axonemal, partial [Columba livia]	30	143096	3	0	1	0	0.6	7.91	1721	1	0	1	401.758	801.501	2	801.423	0.0775	0	28.62	31	R	AELLNDK	S			Cmpd 165, AutoMSn(401.7576), 14.7 min	emPAI	0.02
164	gi|640787037	PREDICTED: probable phospholipid-transporting ATPase IM, partial [Tarsius syrichta]	30	115846	4	0	1	0	0.7	6.95	1716	1	0	1	401.75	801.486	2	801.496	-0.0102	1	28.66	31	R	AEILTKK	E			Cmpd 156, AutoMSn(401.7502), 14.5 min
164	gi|640787037	PREDICTED: probable phospholipid-transporting ATPase IM, partial [Tarsius syrichta]	30	115846	4	0	1	0	0.7	6.95	1717	3	0	1	802.5	801.493	1	801.496	-0.0028	1	24.7	77	R	AEILTKK	E			Cmpd 172, AutoMSn(802.5005), 14.7 min
164	gi|640787037	PREDICTED: probable phospholipid-transporting ATPase IM, partial [Tarsius syrichta]	30	115846	4	0	1	0	0.7	6.95	1720	1	0	1	401.757	801.5	2	801.496	0.0042	1	27.76	38	R	AEILTKK	E			Cmpd 171, AutoMSn(401.7573), 14.7 min
164	gi|640787037	PREDICTED: probable phospholipid-transporting ATPase IM, partial [Tarsius syrichta]	30	115846	4	0	1	0	0.7	6.95	1721	1	0	1	401.758	801.501	2	801.496	0.0047	1	28.62	31	R	AEILTKK	E			Cmpd 165, AutoMSn(401.7576), 14.7 min	emPAI	0.03
165	gi|198419263	PREDICTED: atlastin-2-like, partial [Ciona intestinalis]	29	79470	7	0	1	0	1	8.31	1693	2	1	1	400.244	798.473	2	798.508	-0.0343	1	20.56	140	R	NGVLKLR	T			Cmpd 301, AutoMSn(400.2439), 17.8 min
165	gi|198419263	PREDICTED: atlastin-2-like, partial [Ciona intestinalis]	29	79470	7	0	1	0	1	8.31	1695	1	1	1	400.245	798.475	2	798.508	-0.0323	1	28.83	21	R	NGVLKLR	T			Cmpd 299, AutoMSn(400.2449), 17.8 min
165	gi|198419263	PREDICTED: atlastin-2-like, partial [Ciona intestinalis]	29	79470	7	0	1	0	1	8.31	1696	1	1	1	400.246	798.477	2	798.508	-0.0304	1	20.9	130	R	NGVLKLR	T			Cmpd 305, AutoMSn(400.2458), 17.9 min
165	gi|198419263	PREDICTED: atlastin-2-like, partial [Ciona intestinalis]	29	79470	7	0	1	0	1	8.31	1697	1	1	1	400.246	798.477	2	798.508	-0.0301	1	29.14	19	R	NGVLKLR	T			Cmpd 335, AutoMSn(400.2460), 17.7 min
165	gi|198419263	PREDICTED: atlastin-2-like, partial [Ciona intestinalis]	29	79470	7	0	1	0	1	8.31	1698	1	1	1	400.246	798.478	2	798.508	-0.03	1	29.4	18	R	NGVLKLR	T			Cmpd 280, AutoMSn(400.2461), 17.7 min
[truncated: 75 more rows]

## Sheet: hageni
T. hageni venom proteins identified by proteomics
[truncated: 1,999 more rows]
